# Supplementary material for: An elite allele TaDT1-AhapI enhances drought tolerance via mediating autophagic pathways in wheat
Source: Research Square preprint supplement (doi:10.21203/rs.3.rs-4746769/v1), 2024-08-07
Supplement: Supplementary file 1 [file a3fbb375a3cb6b1e64cebf3b.xlsx]

## Sheet: Supplementary Table 1
Supplementary Table 1. The Survival Rate (%) of 191 accessions used in GWAS.
Varieties	VCF_ID	Biological Replicate 1 (SR, %)			Average of Biological Replicate 1	Biological Replicate 2 (SR, %)			Average of Biological Replicate 2	Average Survival Rate (%) of Biological Replicate 1 and 2
		Technical Replicate 1	Technical Replicate 2	Technical Replicate 3		Technical Replicate 1	Technical Replicate 2	Technical Replicate 3
gaojiasuo	PH146	0	0	0	0	0	0	0	0	0
Triumph	PH149	0	0	0	0	0	0	0	0	0
lumai3	L46	0	0	0	0	0	0	0	0	0
bendihuanghuamai	S242	0	0	0	0	0	0	0	0	0
yizhimai	S250	0	0	0	0	0	0	0	0	0
wangshuibai	SRR10766504	0	0	0	0	0	0	0	0	0
laolaixia	S188	0	0	0	0	0	0	0	0	0
chayusuisuimai5	S257	0	0	0	0	0	4.16667	0	1.38889	0.595238
langxiansuisuimai6	S143	0	4.16667	0	1.38889	0	4.16667	0	1.38889	1.38889
CB037	DJ3	4.7619	0	0	1.5873	0	8.33333	0	2.77778	2.09751
liaochun10	LC10	4.7619	0	0	1.5873	8.33333	4.16667	0	4.16667	2.69274
As1521	S91	4.7619	0	0	1.5873	8.33333	4.16667	4.16667	5.55556	3.28798
nongda3338	ZY-67	4.7619	4.7619	0	3.1746	0	12.5	4.16667	5.55556	4.19501
As2065	S82	0	4.7619	4.7619	3.1746	4.16667	4.16667	8.33333	5.55556	4.19501
AS1525	S90	9.52381	4.7619	4.7619	6.34921	4.16667	4.16667	4.16667	4.16667	5.41383
XM001387	S3	9.52381	9.52381	4.7619	7.93651	4.16667	4.16667	8.33333	5.55556	6.9161
longzisuisuimai23	ZY-28	9.52381	9.52381	14.2857	11.1111	4.16667	4.16667	0	2.77778	7.53968
chayusuisuimai2	S255	9.52381	9.52381	14.2857	11.1111	0	4.16667	8.33333	4.16667	8.13492
langxianzheda17	S153	8.33333	8.33333	8.33333	8.33333	8.33333	8.33333	8.33333	8.33333	8.33333
han6172	PH123	4.7619	9.52381	14.2857	9.52381	8.33333	12.5	4.16667	8.33333	9.01361
youbaomai	PH67	19.0476	14.2857	0	11.1111	0	12.5	8.33333	6.94444	9.3254
AS2064	S83	19.0476	9.52381	4.7619	11.1111	8.33333	8.33333	12.5	9.72222	10.5159
jinan13	SRR10766567	14.2857	9.52381	4.7619	9.52381	12.5	16.6667	20.8333	16.6667	12.585
liuyuehuang	S113	23.8095	19.0476	4.7619	15.873	8.33333	12.5	12.5	11.1111	13.8322
hongjinbaoyin	S254	19.0476	14.2857	9.52381	14.2857	16.6667	12.5	16.6667	15.2778	14.7109
huangxiandalibanmang	PH48	0	23.8095	19.0476	14.2857	16.6667	29.1667	0	15.2778	14.7109
zhoumai26	PH112	19.0476	23.8095	19.0476	20.6349	20.8333	12.5	4.16667	12.5	17.1485
AS1284	S92	19.0476	23.8095	14.2857	19.0476	12.5	16.6667	16.6667	15.2778	17.432
pingyuan50	ZY-10	23.8095	19.0476	23.8095	22.2222	16.6667	12.5	8.33333	12.5	18.0556
xinong529	PH92	19.0476	14.2857	19.0476	17.4603	12.5	20.8333	25	19.4444	18.3107
lumai23	s48	29.1667	8.33333	16.6667	18.0556	14.2857	9.52381	33.3333	19.0476	18.4807
fengchan3	SRR10766499	14.2857	9.52381	23.8095	15.873	20.8333	25	20.8333	22.2222	18.5941
wunong6	PH139	14.2857	19.0476	19.0476	17.4603	16.6667	20.8333	25	20.8333	18.9059
longzizheda15	S155	23.8095	23.8095	19.0476	22.2222	16.6667	16.6667	16.6667	16.6667	19.8413
AS2050	S84	14.2857	19.0476	14.2857	15.873	12.5	25	33.3333	23.6111	19.1893
laiyang4671	PH53	23.8095	14.2857	23.8095	20.6349	16.6667	12.5	29.1667	19.4444	20.1247
aikang58	S11	28.5714	23.8095	14.2857	22.2222	16.6667	12.5	25	18.0556	20.4365
AS1297	S76	28.5714	19.0476	19.0476	22.2222	16.6667	16.6667	20.8333	18.0556	20.4365
baofeng104	bf104-1	9.52381	14.2857	23.8095	15.873	20.8333	29.1667	25	25	19.7846
jimai23	PH50	33.3333	19.0476	14.2857	22.2222	29.1667	20.8333	16.6667	22.2222	22.2222
zhoumai23	PH109	19.0476	23.8095	23.8095	22.2222	29.1667	25	20.8333	25	23.4127
lankao926	PH116	28.5714	14.2857	23.8095	22.2222	25	33.3333	16.6667	25	23.4127
wujiangzhuo	S247	19.0476	28.5714	23.8095	23.8095	25	20.8333	25	23.6111	23.7245
taishan23	PH66	33.3333	28.5714	28.5714	30.1587	20.8333	16.6667	16.6667	18.0556	24.9717
yanzhan4110	SRR10766626	28.5714	19.0476	14.2857	20.6349	20.8333	37.5	25	27.7778	23.6961
longzizheda28	S159	19.0476	19.0476	28.5714	22.2222	25	33.3333	20.8333	26.3889	24.0079
xinmai20	PH93	33.3333	23.8095	19.0476	25.3968	20.8333	25	29.1667	25	25.2268
langxiansuisuimai17	ZY-24	14.2857	23.8095	14.2857	17.4603	29.1667	37.5	33.3333	33.3333	24.263
8762	s8762-1	23.8095	14.2857	38.0952	25.3968	20.8333	29.1667	29.1667	26.3889	25.822
xinmai26	SRR10766489	28.5714	23.8095	23.8095	25.3968	29.1667	20.8333	29.1667	26.3889	25.822
gejiaxiang	S241	0	0	0	0	70.8333	0	85.7143	52.1825	22.3639
tianmin198	PH89	38.0952	33.3333	28.5714	33.3333	20.8333	16.6667	25	20.8333	27.9762
zimai12	PH69	28.5714	38.0952	33.3333	33.3333	20.8333	16.6667	25	20.8333	27.9762
nanda2419	S219	19.0476	23.8095	28.5714	23.8095	20.8333	37.5	37.5	31.9444	27.2959
jiachasuisuimai33	ZY-20	14.2857	19.0476	19.0476	17.4603	33.3333	41.6667	41.6667	38.8889	26.644
jimai44	jimai44	19.0476	23.8095	33.3333	25.3968	20.8333	33.3333	41.6667	31.9444	28.2029
mazhamai	S183	23.8095	19.0476	38.0952	26.9841	28.5714	33.3333	37.5	33.1349	29.6202
pingan8	PH84	19.0476	28.5714	33.3333	26.9841	37.5	33.3333	33.3333	34.7222	30.3005
xiaosanyuehuang	S184	28.5714	33.3333	23.8095	28.5714	29.1667	33.3333	37.5	33.3333	30.6122
zhoumai32	PH115	38.0952	19.0476	28.5714	28.5714	33.3333	37.5	29.1667	33.3333	30.6122
shanmai	S108	28.5714	23.8095	19.0476	23.8095	47.619	33.3333	38.0952	39.6825	30.6122
04luo7427	PH150	38.0952	33.3333	28.5714	33.3333	25	33.3333	37.5	31.9444	32.7381
kenong2009	PH77	33.3333	42.8571	33.3333	36.5079	28.5714	20.8333	37.5	28.9683	33.2766
nongda981	N981-1	19.0476	38.0952	42.8571	33.3333	29.1667	37.5	33.3333	33.3333	33.3333
zhoumai30	PH114	47.619	28.5714	33.3333	36.5079	33.3333	33.3333	25	30.5556	33.9569
zhoumai17	PH106	41.6667	33.3333	29.1667	34.7222	33.3333	37.5	29.1667	33.3333	34.127
luteng1	PH58	38.0952	33.3333	33.3333	34.9206	37.5	29.1667	33.3333	33.3333	34.2404
keyi5214	keyi5214-1	42.8571	38.0952	28.5714	36.5079	33.3333	29.1667	37.5	33.3333	35.1474
weilai0818	PH91	28.5714	33.3333	38.0952	33.3333	33.3333	37.5	41.6667	37.5	35.119
luomai31	PH81	33.3333	28.5714	38.0952	33.3333	33.3333	37.5	41.6667	37.5	35.119
AS1409	S77	38.0952	33.3333	33.3333	34.9206	38.0952	37.5	41.6667	39.0873	36.7063
zhengmai9023	S217	38.0952	42.8571	33.3333	38.0952	41.6667	37.5	33.3333	37.5	37.8401
gao5	G5-1	41.6667	37.5	33.3333	37.5	38.0952	42.8571	37.5	39.4841	38.3503
shannong12	PH59	28.5714	38.0952	42.8571	36.5079	33.3333	41.6667	50	41.6667	38.7188
shannong21	PH60	33.3333	47.619	38.0952	39.6825	41.6667	45.8333	29.1667	38.8889	39.3424
zhahong	S243	52.381	42.8571	47.619	47.619	33.3333	29.1667	33.3333	31.9444	40.9014
wenmai6	PH151	42.8571	38.0952	47.619	42.8571	45.8333	37.5	33.3333	38.8889	41.1565
baidatou	S106	38.0952	42.8571	33.3333	38.0952	37.5	37.5	58.3333	44.4444	40.8163
taishan1	SRR10766631	42.8571	38.0952	33.3333	38.0952	41.6667	50	41.6667	44.4444	40.8163
zhumaoyuanzitou	S24	42.8571	47.619	33.3333	41.2698	41.6667	45.8333	41.6667	43.0556	42.0351
xinong558	PH141	42.8571	38.0952	42.8571	41.2698	41.6667	45.8333	41.6667	43.0556	42.0351
yuejin5	PH68	47.619	42.8571	52.381	47.619	41.6667	37.5	33.3333	37.5	43.2823
taishan22	PH65	38.0952	38.0952	47.619	41.2698	54.1667	37.5	41.6667	44.4444	42.6304
zhoumai19	PH107	47.619	38.0952	42.8571	42.8571	41.6667	45.8333	45.8333	44.4444	43.5374
lankao198	PH78	57.1429	33.3333	38.0952	42.8571	37.5	45.8333	50	44.4444	43.5374
xinong9872	PH145	47.619	47.619	38.0952	44.4444	41.6667	54.16	33.3333	43.0533	43.8483
dalibanmang	S187	38.0952	47.619	42.8571	42.8571	45.8333	50	41.6667	45.8333	44.1327
zhengnong17	PH98	42.8571	33.3333	47.619	41.2698	45.8333	50	54.16	49.9978	45.0104
bianbachunmai6	S245	47.619	42.8571	42.8571	44.4444	45.8333	45.8333	50	47.2222	45.6349
yanzhan1	S218	42.8571	47.619	47.619	46.0317	41.6667	45.8333	50	45.8333	45.9467
motuoxiaomai	S244	47.619	52.381	52.381	50.7937	45.8333	41.6667	41.6667	43.0556	47.4773
954072	954072	38.0952	52.381	42.8571	44.4444	50	45.8333	54.16	49.9978	46.8244
pingan9	PH85	57.1429	42.8571	33.3333	44.4444	45.8333	54.1667	50	50	46.8254
xishanbiansui	S185	52.381	47.619	47.619	49.2063	45.8333	45.8333	45.8333	45.8333	47.7608
xinong556	PH140	57.1429	42.8571	47.619	49.2063	41.6667	45.8333	50	45.8333	47.7608
Lovrin10	SRR10766516	47.619	42.8571	57.1429	49.2063	54.1667	41.6667	45.8333	47.2222	48.356
4332	C2-1	57.1429	47.619	47.619	50.7937	45.8333	50	41.6667	45.8333	48.6678
zhongyu1123	PH101	52.381	47.619	47.619	49.2063	50	45.8333	50	48.6111	48.9512
heng4399	PH124	47.619	52.381	61.9048	53.9683	37.5	45.8333	50	44.4444	49.8866
Apache	ZY-12	47.619	42.8571	42.8571	44.4444	54.1667	54.1667	58.3333	55.5556	49.2063
changzhi6406	S209	42.8571	52.381	47.619	47.619	45.8333	54.1667	57.1429	52.381	49.6599
taishan5	PH63	61.9048	42.8571	45.8333	50.1984	50	54.16	45.8333	49.9978	50.1124
longzizheda4	ZY-41	61.9048	47.619	45.8333	51.7857	50	50	45.8333	48.6111	50.4252
chixiaomai	PH147	57.1429	45.8333	52.381	51.7857	45.8333	45.8333	54.1667	48.6111	50.4252
shannongyoumai3	PH61	58.3333	50	47.619	51.9841	41.6667	45.8333	58.3333	48.6111	50.5385
nongda3097	s3097-1	42.8571	52.381	57.1429	50.7937	54.1667	45.8333	50	50	50.4535
taishan4	PH62	61.9048	47.619	42.8571	50.7937	45.8333	54.1667	50	50	50.4535
luomai24	PH80	61.9048	47.619	42.8571	50.7937	45.8333	41.6667	62.5	50	50.4535
jinmai31	PH118	57.1429	57.1429	42.8571	52.381	41.6667	54.16	50	48.6089	50.7644
zhoumai27	zhou-27	47.619	57.1429	42.8571	49.2063	45.8333	54.16	58.3333	52.7756	50.736
luzi238	LZ238	38.0952	42.8571	57.1429	46.0317	54.1667	58.3333	58.3333	56.9444	50.7086
lumai15	PH56	52.381	42.8571	42.8571	46.0317	50	58.3333	62.5	56.9444	50.7086
yaomai16	PH122	52.381	47.619	42.8571	47.619	54.16	62.5	50	55.5533	51.0195
yannong23	PH71	52.381	61.9048	38.0952	50.7937	50	50	58.3333	52.7778	51.644
TAA10	C3-2	47.619	57.1429	42.8571	49.2063	58.3333	54.1667	54.1667	55.5556	51.9274
yunhan805	PH120	47.619	38.0952	52.381	46.0317	54.16	66.6667	58.3333	59.72	51.8981
As1367	S75	42.8571	42.8571	42.8571	42.8571	62.5	62.5	66.6667	63.8889	51.8707
bima4	S213	47.619	42.8571	42.8571	44.4444	62.5	66.6667	66.6667	65.2778	53.373
pingan7	PH83	52.381	66.6667	42.8571	53.9683	54.1667	58.3333	62.5	58.3333	55.839
beijing8	SRR10766520	52.381	61.9048	52.381	55.5556	58.3333	41.6667	70.8333	56.9444	56.1508
291	291	66.6667	52.381	52.381	57.1429	58.3333	62.5	62.5	61.1111	58.8435
sumai3	S210	61.9048	47.619	66.6667	58.7302	66.6667	54.1667	66.6667	62.5	60.3458
liangxing99	SRR10766492	47.619	71.4286	71.4286	63.4921	62.5	41.6667	70.8333	58.3333	61.2812
enmai4	S211	66.6667	57.1429	71.4286	65.0794	54.1667	70.8333	50	58.3333	62.1882
jinan17	SRR10766558	61.9048	76.1905	71.4286	69.8413	58.3333	50	54.16	54.1644	63.1226
yunhan20410	PH121	66.6667	61.9048	57.1429	61.9048	54.16	62.5	70.8333	62.4978	62.1589
zhoumai22	PH108	61.9048	71.4286	61.9048	65.0794	62.5	62.5	54.16	59.72	62.7825
ningchun4	SRR10766556	61.9048	57.1429	66.6667	61.9048	70.8333	58.3333	62.5	63.8889	62.7551
ji200040919	ji200040919	71.4286	57.1429	61.9048	63.4921	62.5	58.3333	66.6667	62.5	63.0669
zhongyuanmai	PH104	61.9048	66.6667	66.6667	65.0794	70.8333	58.3333	62.5	63.8889	64.5692
zhengnong46	PH99	57.1429	66.6667	61.9048	61.9048	62.5	66.6667	75	68.0556	64.5408
luomai23	PH79	71.4286	61.9048	58.3333	63.8889	58.3333	70.8333	70.8333	66.6667	65.0794
jingdong6	s6554	71.4286	76.1905	57.1429	68.254	58.3333	66.6667	62.5	62.5	65.788
muzongzhuoga	S248	66.6667	58.3333	70.8333	65.2778	76.1905	66.6667	57.1429	66.6667	65.873
jimai229	jimai229	71.4286	76.1905	52.381	66.6667	62.5	62.5	70.8333	65.2778	66.0714
291S	291S	57.1429	76.1905	57.1429	63.4921	66.6667	70.8333	70.8333	69.4444	66.0431
zhengyin4	SRR10766517	85.7143	61.9048	71.4286	73.0159	66.6667	58.3333	58.3333	61.1111	67.9138
nonglin10	S238	71.4286	76.1905	52.381	66.6667	66.6667	70.8333	66.6667	68.0556	67.2619
dabaimai	S103	4.7619	0	100	34.9206	100	100	100	100	62.8118
tianhe3	PH88	52.381	61.9048	66.6667	60.3175	70.8333	75	79.1667	75	66.61
yannong21	PH70	80.9524	76.1905	76.1905	77.7778	62.5	66.6667	54.1667	61.1111	70.6349
bonong6	PH72	76.1905	71.4286	66.6667	71.4286	66.6667	70.8333	66.6667	68.0556	69.983
zhoumai18	S135	80.9524	76.1905	71.4286	76.1905	66.6667	62.5	66.6667	65.2778	71.5136
xinmai208	PH94	66.6667	61.9048	71.4286	66.6667	70.8333	75	79.1667	75	70.2381
nongda5181	S140	66.6667	71.4286	80.9524	73.0159	70.8333	75	70.8333	72.2222	72.6757
hengguan35	PH126	76.1905	71.4286	71.4286	73.0159	70.8333	75	70.8333	72.2222	72.6757
AS1772	ZY-5	76.1905	71.4286	61.9048	69.8413	79.1667	75	75	76.3889	72.6474
zhongyu6	PH102	66.6667	66.6667	76.1905	69.8413	70.8333	79.1667	79.1667	76.3889	72.6474
nongda3753	s3753-1	80.9524	76.1905	61.9048	73.0159	66.6667	75	79.1667	73.6111	73.271
zhoumai24	PH110	80.9524	76.1905	71.4286	76.1905	79.1667	66.6667	66.6667	70.8333	73.8946
zhengpinmai8	PH100	80.9524	80.9524	71.4286	77.7778	66.6667	66.6667	75	69.4444	74.2063
taishan21	PH64	61.9048	61.9048	85.7143	69.8413	79.1667	83.3333	70.8333	77.7778	73.2426
linfen5064	PH119	76.1905	85.7143	71.4286	77.7778	66.6667	66.6667	79.1667	70.8333	74.8016
jimai19	PH49	76.1905	80.9524	80.9524	79.3651	76.1905	75	66.6667	72.619	76.4739
fan6	SRR10766515	85.7143	71.4286	71.4286	76.1905	75	75	79.1667	76.3889	76.2755
dehongfumai8	PH73	80.9524	85.7143	76.1905	80.9524	66.6667	70.8333	79.1667	72.2222	77.2109
aodesa3	S237	85.7143	80.9524	76.1905	80.9524	70.8333	79.1667	70.8333	73.6111	77.8061
yimai6	PH96	90.4762	80.9524	71.4286	80.9524	70.8333	70.8333	79.1667	73.6111	77.8061
anhui3	PH152	85.7143	85.7143	76.1905	82.5397	75	83.3333	62.5	73.6111	78.7132
bainong3217	SRR10766571	85.7143	76.1905	85.7143	82.5397	62.5	70.8333	87.5	73.6111	78.7132
chang6878	long6878-1	90.4762	85.7143	71.4286	82.5397	70.8333	75	75	73.6111	78.7132
hongdongmai	S253	76.1905	80.9524	71.4286	76.1905	87.5	75	79.1667	80.5556	78.0612
lankao906	DJ5	85.7143	80.9524	80.9524	82.5397	70.8333	75	79.1667	75	79.3084
zhongyu8	PH103	76.1905	76.1905	80.9524	77.7778	75	83.3333	83.3333	80.5556	78.9683
rikeze8	S230	61.9048	71.4286	80.9524	71.4286	83.3333	91.6667	87.5	87.5	78.3163
nongda3753mutant	s564-1-1	76.1905	90.4762	80.9524	82.5397	70.8333	79.1667	79.1667	76.3889	79.9036
fengwu981	PH74	76.1905	80.9524	66.6667	74.6032	85.7143	83.3333	87.5	85.5159	79.28
neixiang5	SRR10766554	76.1905	80.9524	80.9524	79.3651	83.3333	79.1667	83.3333	81.9444	80.4705
TAM107	TAM107	85.7143	80.9524	76.1905	80.9524	79.1667	83.3333	79.1667	80.5556	80.7823
zhoumai25	PH111	80.9524	80.9524	85.7143	82.5397	83.3333	70.8333	83.3333	79.1667	81.0941
yujiao6	PH97	80.9524	85.7143	90.4762	85.7143	83.3333	75	70.8333	76.3889	81.7177
lumai22	PH57	85.7143	90.4762	76.1905	84.127	75	79.1667	83.3333	79.1667	82.0011
tianmin298	PH90	80.9524	71.4286	90.4762	80.9524	79.1667	83.3333	87.5	83.3333	81.9728
liangxing77	PH54	85.7143	80.9524	90.4762	85.7143	70.8333	79.1667	87.5	79.1667	82.9082
jing411	C5-1	85.7143	71.4286	85.7143	80.9524	87.5	83.3333	83.3333	84.7222	82.568
zhoumai16	PH105	95.2381	85.7143	76.1905	85.7143	79.1667	83.3333	79.1667	80.5556	83.5034
XX329	XX-2	90.4762	85.7143	80.9524	85.7143	79.1667	83.3333	79.1667	80.5556	83.5034
shijiazhuang54	S227	80.9524	90.4762	85.7143	85.7143	79.1667	83.3333	83.3333	81.9444	84.0986
zangdong4	S228	61.9048	85.7143	85.7143	77.7778	83.3333	91.6667	95.8333	90.2778	83.1349
heng6632	PH125	85.7143	80.9524	76.1905	80.9524	79.1667	87.5	95.8333	87.5	83.7585
shi4185	2DL-R2	90.4762	85.7143	85.7143	87.3016	83.3333	79.1667	87.5	83.3333	85.6009
rikeze54	S229	90.4762	85.7143	85.7143	87.3016	79.1667	87.5	91.6667	86.1111	86.7914
jinan16	PH52	80.9524	85.7143	95.2381	87.3016	83.3333	87.5	91.6667	87.5	87.3866
lunxuan987	SRR10766625	95.2381	90.4762	90.4762	92.0635	79.1667	83.3333	91.6667	84.7222	88.9172
jinmai47	SRR10766495	85.7143	90.4762	90.4762	88.8889	91.6667	95.8333	79.1667	88.8889	88.8889
luohan7	PH117	85.7143	90.4762	95.2381	90.4762	87.5	83.3333	91.6667	87.5	89.2007
shannong138	L446	85.7143	90.4762	91.6667	89.2857	90.4762	87.5	95.8333	91.2698	90.1361
changle5	PH47	85.7143	95.2381	95.2381	92.0635	87.5	91.6667	95.8333	91.6667	91.8934
jin50LP-82	s295	100	100	100	100	100	95.8333	91.6667	95.8333	98.2143
zhengmai1817	L277	100	100	95.2381	98.4127	95.8333	100	100	98.6111	98.4977
kangdingxiaomai	S249	100	100	100	100	100	100	100	100	100
The correlation between two independent replicate experiments was 0.945

## Sheet: Supplementary Table 2
Supplementary Table 2. Information of SNPs associated with wheat drought tolerance with P value < 1 × 10-4 in Chromosome 2A.
Chromosome	Position	P value	Reference_allele	Alternative_allele
2A	274763108	2.1908e-10	C	T
2A	419944033	1.2754e-10	C	T
2A	421875626	2.3153e-10	G	A
2A	424810703	2.2509e-10	G	A
2A	425327465	1.6861e-10	C	T
2A	426860538	1.7122e-10	T	C
2A	427049880	1.106e-10	C	G
2A	431941174	1.9109e-10	A	G
2A	432778936	1.9321e-10	C	G
2A	432893334	9.1957e-11	A	G
2A	436591765	1.5318e-10	G	A
2A	436749371	4.0279e-11	G	T
2A	449424760	1.5466e-10	G	A
2A	449692082	1.4152e-10	C	T
2A	454560139	4.2958e-11	A	G
2A	454560155	2.2644e-10	T	C
2A	455742322	8.9581e-11	C	T
2A	466938538	5.8507e-11	T	C
2A	466938539	5.8507e-11	T	G
2A	504378607	4.7054e-11	A	C

## Sheet: Supplementary Table 3
Supplementary Table 3. The structure classifications of the 191 wheat varieties in GWAS and distributions of the haplotypes.
Varieties	VCF_ID	Group	Haplotype	Classification
lankao926	PH116	Clade I	Hap II	Cultivar
tianmin198	PH89	Clade I	Hap II	Cultivar
lankao198	PH78	Clade I	Hap II	Cultivar
yanzhan4110	SRR10766626	Clade I	Hap II	Cultivar
xinmai208	PH94	Clade I	Hap II	Cultivar
yanzhan1	S218	Clade I	Hap II	Cultivar
zhoumai32	PH115	Clade I	Hap II	Cultivar
aikang58	S11	Clade I	Hap II	Cultivar
8762	s8762-1	Clade I	Hap II	Cultivar
zhongyu1123	PH101	Clade I	Hap II	Cultivar
pingan8	PH84	Clade I	Hap II	Cultivar
zhoumai26	PH112	Clade I	Hap II	Cultivar
zhoumai17	PH106	Clade I	Hap II	Cultivar
luomai31	PH81	Clade I	Hap II	Cultivar
chixiaomai	PH147	Clade I	Hap I	Landrace
As1367	S75	Clade I	Hap I	Landrace
gaojiasuo	PH146	Clade I	Hap I	Cultivar
fan6	SRR10766515	Clade I	Hap I	Cultivar
enmai4	S211	Clade I	Hap I	Cultivar
tianmin298	PH90	Clade I	Hap I	Cultivar
luomai24	PH80	Clade I	Hap I	Cultivar
04luo7427	PH150	Clade I	Hap I	Cultivar
weilai0818	PH91	Clade I	Hap I	Cultivar
lumai15	PH56	Clade I	Hap I	Cultivar
zhongyu8	PH103	Clade I	Hap I	Cultivar
zhongyu6	PH102	Clade I	Hap I	Cultivar
zhoumai25	PH111	Clade I	Hap I	Cultivar
luomai23	PH79	Clade I	Hap I	Cultivar
zhongyuanmai	PH104	Clade I	Hap I	Cultivar
bainong3217	SRR10766571	Clade I	Hap I	Cultivar
pingan7	PH83	Clade I	Hap I	Cultivar
fengwu981	PH74	Clade I	Hap I	Cultivar
zhoumai16	PH105	Clade I	Hap I	Cultivar
dehongfumai8	PH73	Clade I	Hap I	Cultivar
zhoumai24	PH110	Clade I	Hap I	Cultivar
zhoumai27	zhou-27	Clade I	Hap I	Cultivar
zimai12	PH69	Clade I	Hap I	Cultivar
zhengpinmai8	PH100	Clade I	Hap I	Cultivar
zhengnong46	PH99	Clade I	Hap I	Cultivar
yimai6	PH96	Clade I	Hap I	Cultivar
zhoumai23	PH109	Clade I	Hap I	Cultivar
zhoumai22	PH108	Clade I	Hap I	Cultivar
zhoumai30	PH114	Clade I	Hap I	Cultivar
tianhe3	PH88	Clade I	Hap I	Cultivar
zhoumai18	S135	Clade I	Hap I	Cultivar
Apache	ZY-12	Clade I	Hap I	Cultivar
lankao906	DJ5	Clade I	Hap I	Cultivar
shi4185	2DL-R2	Clade II	Hap II	Cultivar
ningchun4	SRR10766556	Clade II	Hap II	Cultivar
954072	954072	Clade II	Hap II	Cultivar
linfen5064	PH119	Clade II	Hap II	Cultivar
taishan5	PH63	Clade II	Hap II	Cultivar
hengguan35	PH126	Clade II	Hap II	Cultivar
yujiao6	PH97	Clade II	Hap II	Cultivar
shannong138	L446	Clade II	Hap I	Cultivar
291S	291S	Clade II	Hap I	Landrace
xinong556	PH140	Clade II	Hap I	Cultivar
luzi238	LZ238	Clade II	Hap I	Cultivar
anhui3	PH152	Clade II	Hap I	Cultivar
sumai3	S210	Clade II	Hap I	Cultivar
shannongyoumai3	PH61	Clade II	Hap I	Cultivar
AS1772	ZY-5	Clade II	Hap I	Landrace
changzhi6406	S209	Clade II	Hap I	Cultivar
nonglin10	S238	Clade II	Hap I	Cultivar
yaomai16	PH122	Clade II	Hap I	Cultivar
han6172	PH123	Clade II	Hap I	Cultivar
taishan22	PH65	Clade II	Hap I	Cultivar
jinan17	SRR10766558	Clade II	Hap I	Cultivar
jimai19	PH49	Clade II	Hap I	Cultivar
yannong23	PH71	Clade II	Hap I	Cultivar
yannong21	PH70	Clade II	Hap I	Cultivar
shannong21	PH60	Clade II	Hap I	Cultivar
liangxing77	PH54	Clade II	Hap I	Cultivar
jimai23	PH50	Clade II	Hap I	Cultivar
TAM107	TAM107	Clade II	Hap I	Cultivar
aodesa3	S237	Clade II	Hap I	Cultivar
Triumph	PH149	Clade II	Hap I	Cultivar
heng6632	PH125	Clade II	Hap I	Cultivar
lunxuan987	SRR10766625	Clade II	Hap I	Cultivar
jingdong6	s6554	Clade II	Hap I	Cultivar
jinan16	PH52	Clade II	Hap I	Cultivar
lumai22	PH57	Clade II	Hap I	Cultivar
jimai229	jimai229	Clade II	Hap I	Cultivar
ji200040919	ji200040919	Clade II	Hap I	Cultivar
zhengmai1817	L277	Clade II	Hap I	Cultivar
nongda3753mutant	s564-1-1	Clade II	Hap I	Cultivar
nongda3753	s3753-1	Clade II	Hap I	Cultivar
jimai44	jimai44	Clade II	Hap I	Cultivar
liangxing99	SRR10766492	Clade II	Hap I	Cultivar
XX329	XX-2	Clade II	Hap I	Landrace
TAA10	C3-2	Clade II	Hap I	Cultivar
gao5	G5-1	Clade II	Hap I	Cultivar
Lovrin10	SRR10766516	Clade II	Hap I	Cultivar
jing411	C5-1	Clade II	Hap I	Cultivar
291	291	Clade II	Hap I	Cultivar
zhumaoyuanzitou	S24	Clade III	Hap II	Landrace
chayusuisuimai5	S257	Clade III	Hap II	Landrace
chayusuisuimai2	S255	Clade III	Hap II	Landrace
liaochun10	LC10	Clade III	Hap II	Cultivar
CB037	DJ3	Clade III	Hap II	Cultivar
zhoumai19	PH107	Clade III	Hap II	Cultivar
xinmai20	PH93	Clade III	Hap II	Cultivar
zhengnong17	PH98	Clade III	Hap II	Cultivar
wenmai6	PH151	Clade III	Hap II	Cultivar
xinmai26	SRR10766489	Clade III	Hap II	Cultivar
laiyang4671	PH53	Clade III	Hap II	Cultivar
jinan13	SRR10766567	Clade III	Hap II	Cultivar
rikeze8	S230	Clade III	Hap II	Cultivar
heng4399	PH124	Clade III	Hap II	Cultivar
baofeng104	bf104-1	Clade III	Hap II	Cultivar
xinong9872	PH145	Clade III	Hap II	Cultivar
xinong558	PH141	Clade III	Hap II	Cultivar
shannong12	PH59	Clade III	Hap II	Cultivar
zhengyin4	SRR10766517	Clade III	Hap II	Cultivar
xinong529	PH92	Clade III	Hap II	Cultivar
nanda2419	S219	Clade III	Hap II	Cultivar
jiachasuisuimai33	ZY-20	Clade III	Hap II	Landrace
wunong6	PH139	Clade III	Hap II	Cultivar
zhengmai9023	S217	Clade III	Hap II	Cultivar
kenong2009	PH77	Clade III	Hap II	Cultivar
youbaomai	PH67	Clade III	Hap II	Cultivar
taishan1	SRR10766631	Clade III	Hap II	Cultivar
rikeze54	S229	Clade III	Hap II	Cultivar
langxianzheda17	S153	Clade III	Hap II	Landrace
longzizheda15	S155	Clade III	Hap II	Landrace
longzisuisuimai23	ZY-28	Clade III	Hap II	Landrace
4332	C2-1	Clade III	Hap II	Cultivar
nongda3338	ZY-67	Clade III	Hap II	Cultivar
keyi5214	keyi5214-1	Clade III	Hap II	Cultivar
nongda981	N981-1	Clade III	Hap II	Cultivar
AS2050	S84	Clade III	Hap II	Landrace
As2065	S82	Clade III	Hap II	Landrace
AS2064	S83	Clade III	Hap II	Landrace
luteng1	PH58	Clade III	Hap II	Cultivar
huangxiandalibanmang	PH48	Clade III	Hap II	Landrace
neixiang5	SRR10766554	Clade III	Hap II	Cultivar
dalibanmang	S187	Clade III	Hap II	Landrace
xishanbiansui	S185	Clade III	Hap II	Landrace
yuejin5	PH68	Clade III	Hap II	Cultivar
mazhamai	S183	Clade III	Hap II	Landrace
pingyuan50	ZY-10	Clade III	Hap II	Landrace
wangshuibai	SRR10766504	Clade III	Hap II	Landrace
lumai3	L46	Clade III	Hap II	Cultivar
laolaixia	S188	Clade III	Hap II	Landrace
xiaosanyuehuang	S184	Clade III	Hap II	Landrace
fengchan3	SRR10766499	Clade III	Hap II	Cultivar
wujiangzhuo	S247	Clade III	Hap II	Landrace
dabaimai	S103	Clade III	Hap II	Landrace
baidatou	S106	Clade III	Hap II	Landrace
hongdongmai	S253	Clade III	Hap II	Landrace
muzongzhuoga	S248	Clade III	Hap II	Landrace
liuyuehuang	S113	Clade III	Hap II	Landrace
yizhimai	S250	Clade III	Hap II	Landrace
shanmai	S108	Clade III	Hap II	Landrace
kangdingxiaomai	S249	Clade III	Hap II	Landrace
bendihuanghuamai	S242	Clade III	Hap II	Landrace
motuoxiaomai	S244	Clade III	Hap II	Landrace
hongjinbaoyin	S254	Clade III	Hap II	Landrace
bianbachunmai6	S245	Clade III	Hap II	Landrace
langxiansuisuimai17	ZY-24	Clade III	Hap II	Landrace
langxiansuisuimai6	S143	Clade III	Hap II	Landrace
XM001387	S3	Clade III	Hap II	Landrace
zhahong	S243	Clade III	Hap II	Landrace
As1521	S91	Clade III	Hap II	Landrace
AS1525	S90	Clade III	Hap II	Landrace
AS1284	S92	Clade III	Hap II	Landrace
AS1409	S77	Clade III	Hap II	Landrace
AS1297	S76	Clade III	Hap II	Landrace
pingan9	PH85	Clade III	Hap I	Cultivar
taishan4	PH62	Clade III	Hap I	Cultivar
bonong6	PH72	Clade III	Hap I	Cultivar
changle5	PH47	Clade III	Hap I	Cultivar
shijiazhuang54	S227	Clade III	Hap I	Cultivar
bima4	S213	Clade III	Hap I	Cultivar
beijing8	SRR10766520	Clade III	Hap I	Cultivar
taishan23	PH66	Clade III	Hap I	Cultivar
taishan21	PH64	Clade III	Hap I	Cultivar
yunhan805	PH120	Clade III	Hap I	Cultivar
jinmai31	PH118	Clade III	Hap I	Cultivar
yunhan20410	PH121	Clade III	Hap I	Cultivar
luohan7	PH117	Clade III	Hap I	Cultivar
jinmai47	SRR10766495	Clade III	Hap I	Cultivar
zangdong4	S228	Clade III	Hap I	Cultivar
longzizheda4	ZY-41	Clade III	Hap I	Landrace
longzizheda28	S159	Clade III	Hap I	Landrace
nongda5181	S140	Clade III	Hap I	Cultivar
nongda3097	s3097-1	Clade III	Hap I	Cultivar
gejiaxiang	S241	Clade III	Hap I	Landrace
chang6878	long6878-1	Clade III	Hap I	Cultivar
jin50LP-82	s295	Clade III	Hap I	Cultivar
lumai23	s48	Clade III	Hap I	Cultivar

## Sheet: Supplementary Table 4
Supplementary Table 4. The variations of TaDT1-A in 115 accessions were identified by re-sequencing based on PCR amplification.
Varieties	VCF_ID	Haplotype	-819bp	-792bp	-747bp	-392bp	-217bp
			v1	v2	v3	v4	v5
Triumph	PH149	Hap I	0	C	C	G	C
gaojiasuo	PH146	Hap I	0	C	C	G	C
han6172	PH123	Hap I	0	C	C	G	C
lumai23	s48	Hap I	0	C	C	G	C
jimai23	PH50	Hap I	0	C	C	G	C
zhoumai23	PH109	Hap I	0	C	C	G	C
taishan23	PH66	Hap I	0	C	C	G	C
longzizheda28	S159	Hap I	0	C	C	G	C
gejiaxiang	S241	Hap I	0	C	C	G	C
zimai12	PH69	Hap I	0	C	C	G	C
jimai44	jimai44	Hap I	0	C	C	G	C
04luo7427	PH150	Hap I	0	C	C	G	C
zhoumai30	PH114	Hap I	0	C	C	G	C
weilai0818	PH91	Hap I	0	C	C	G	C
gao5	G5-1	Hap I	0	C	C	G	C
shannong21	PH60	Hap I	0	C	C	G	C
taishan22	PH65	Hap I	0	C	C	G	C
pingan9	PH85	Hap I	0	C	C	G	C
xinong556	PH140	Hap I	0	C	C	G	C
Lovrin10	SRR10766516	Hap I	0	C	C	G	C
Apache	ZY-12	Hap I	0	C	C	G	C
changzhi6406	S209	Hap I	0	C	C	G	C
chixiaomai	PH147	Hap I	0	C	C	G	C
longzizheda4	ZY-41	Hap I	0	C	C	G	C
luomai23	PH79	Hap I	0	C	C	G	C
jingdong6	s6554	Hap I	0	C	C	G	C
jimai229	jimai229	Hap I	0	C	C	G	C
291S	291S	Hap I	0	C	C	G	C
nonglin10	S238	Hap I	0	C	C	G	C
tianhe3	PH88	Hap I	0	C	C	G	C
yannong21	PH70	Hap I	0	C	C	G	C
bonong6	PH72	Hap I	0	C	C	G	C
zhoumai18	S135	Hap I	0	C	C	G	C
nongda5181	S140	Hap I	0	C	C	G	C
AS1772	ZY-5	Hap I	0	C	C	G	C
zhongyu6	PH102	Hap I	0	C	C	G	C
nongda3753	s3753-1	Hap I	0	C	C	G	C
zhoumai24	PH110	Hap I	0	C	C	G	C
zhengpinmai8	PH100	Hap I	0	C	C	G	C
taishan21	PH64	Hap I	0	C	C	G	C
jimai19	PH49	Hap I	0	C	C	G	C
fan6	SRR10766515	Hap I	0	C	C	G	C
shannong138	L446	Hap I	0	C	C	G	C
changle5	PH47	Hap I	0	C	C	G	C
jin50LP-82	s295	Hap I	0	C	C	G	C
zhengmai1817	L277	Hap I	0	C	C	G	C
bendihuanghuamai	S242	Hap II	Insertion 899bp	0	G	A	0
laolaixia	S188	Hap II	Insertion 899bp	0	G	A	0
lumai3	L46	Hap II	Insertion 899bp	0	G	A	0
wangshuibai	SRR10766504	Hap II	Insertion 899bp	0	G	A	0
yizhimai	S250	Hap II	Insertion 899bp	0	G	A	0
chayusuisuimai5	S257	Hap II	Insertion 899bp	0	G	A	0
langxiansuisuimai6	S143	Hap II	Insertion 899bp	0	G	A	0
CB037	DJ3	Hap II	Insertion 899bp	0	G	A	0
liaochun10	LC10	Hap II	Insertion 899bp	0	G	A	0
As1521	S91	Hap II	Insertion 899bp	0	G	A	0
As2065	S82	Hap II	Insertion 899bp	0	G	A	0
nongda3338	ZY-67	Hap II	Insertion 899bp	0	G	A	0
AS1525	S90	Hap II	Insertion 899bp	0	G	A	0
XM001387	S3	Hap II	Insertion 899bp	0	G	A	0
longzisuisuimai23	ZY-28	Hap II	Insertion 899bp	0	G	A	0
chayusuisuimai2	S255	Hap II	Insertion 899bp	0	G	A	0
langxianzheda17	S153	Hap II	Insertion 899bp	0	G	A	0
youbaomai	PH67	Hap II	Insertion 899bp	0	G	A	0
AS2064	S83	Hap II	Insertion 899bp	0	G	A	0
jinan13	SRR10766567	Hap II	Insertion 899bp	0	G	A	0
liuyuehuang	S113	Hap II	Insertion 899bp	0	G	A	0
hongjinbaoyin	S254	Hap II	Insertion 899bp	0	G	A	0
huangxiandalibanmang	PH48	Hap II	Insertion 899bp	0	G	A	0
zhoumai26	PH112	Hap II	Insertion 899bp	0	G	A	0
AS1284	S92	Hap II	Insertion 899bp	0	G	A	0
pingyuan50	ZY-10	Hap II	Insertion 899bp	0	G	A	0
xinong529	PH92	Hap II	Insertion 899bp	0	G	A	0
fengchan3	SRR10766499	Hap II	Insertion 899bp	0	G	A	0
wunong6	PH139	Hap II	Insertion 899bp	0	G	A	0
longzizheda15	S155	Hap II	Insertion 899bp	0	G	A	0
AS2050	S84	Hap II	Insertion 899bp	0	G	A	0
laiyang4671	PH53	Hap II	Insertion 899bp	0	G	A	0
aikang58	S11	Hap II	Insertion 899bp	0	G	A	0
AS1297	S76	Hap II	Insertion 899bp	0	G	A	0
baofeng104	bf104-1	Hap II	Insertion 899bp	0	G	A	0
lankao926	PH116	Hap II	Insertion 899bp	0	G	A	0
wujiangzhuo	S247	Hap II	Insertion 899bp	0	G	A	0
yanzhan4110	SRR10766626	Hap II	Insertion 899bp	0	G	A	0
xinmai20	PH93	Hap II	Insertion 899bp	0	G	A	0
langxiansuisuimai17	ZY-24	Hap II	Insertion 899bp	0	G	A	0
8762	s8762-1	Hap II	Insertion 899bp	0	G	A	0
xinmai26	SRR10766489	Hap II	Insertion 899bp	0	G	A	0
tianmin198	PH89	Hap II	Insertion 899bp	0	G	A	0
nanda2419	S219	Hap II	Insertion 899bp	0	G	A	0
jiachasuisuimai33	ZY-20	Hap II	Insertion 899bp	0	G	A	0
mazhamai	S183	Hap II	Insertion 899bp	0	G	A	0
pingan8	PH84	Hap II	Insertion 899bp	0	G	A	0
xiaosanyuehuang	S184	Hap II	Insertion 899bp	0	G	A	0
zhoumai32	PH115	Hap II	Insertion 899bp	0	G	A	0
shanmai	S108	Hap II	Insertion 899bp	0	G	A	0
kenong2009	PH77	Hap II	Insertion 899bp	0	G	A	0
nongda981	N981-1	Hap II	Insertion 899bp	0	G	A	0
zhoumai17	PH106	Hap II	Insertion 899bp	0	G	A	0
luteng1	PH58	Hap II	Insertion 899bp	0	G	A	0
keyi5214	keyi5214-1	Hap II	Insertion 899bp	0	G	A	0
luomai31	PH81	Hap II	Insertion 899bp	0	G	A	0
kangdingxiaomai	S249	Hap II	Insertion 899bp	0	G	A	0
zhengmai9023	S217	Hap II	Insertion 899bp	0	G	A	0
shannong12	PH59	Hap II	Insertion 899bp	0	G	A	0
wenmai6	PH151	Hap II	Insertion 899bp	0	G	A	0
zhahong	S243	Hap II	Insertion 899bp	0	G	A	0
baidatou	S106	Hap II	Insertion 899bp	0	G	A	0
taishan1	SRR10766631	Hap II	Insertion 899bp	0	G	A	0
zhumaoyuanzitou	S24	Hap II	Insertion 899bp	0	G	A	0
xinong558	PH141	Hap II	Insertion 899bp	0	G	A	0
yuejin5	PH68	Hap II	Insertion 899bp	0	G	A	0
lankao198	PH78	Hap II	Insertion 899bp	0	G	A	0
zhoumai19	PH107	Hap II	Insertion 899bp	0	G	A	0
xinong9872	PH145	Hap II	Insertion 899bp	0	G	A	0

## Sheet: Supplementary Table 5
Supplementary Table 5. The potential upstream regulators of TaDT1-A identified by Y1H assays using the 899bp fragment of TaDT1-AHapⅡ as bait sequence
Wheat Gene	Wheat Description	Rice Gene	Rice Description	Tair Gene	Tair Description
TraesCS1A02G049100	BURP domain protein RD22
TraesCS1A02G203600	Chitinase	Os10g0542900	Cht8; Similar to chitinase
TraesCS1A02G212000	Expansin protein	Os10g0555600	Beta-expansin precursor	AT3G60570	EXPB5; Expansin-B5
TraesCS1B02G117400	1-aminocyclopropane-1-carboxylate oxidase	Os05g0149400	ACC oxidase, Ethylene biosynthesis
TraesCS1B02G208000	Basic helix loop helix (BHLH) family transcription factor	Os10g0575000	JAZ-interacting transcription factor, Positive regulator of jasmonate (JA) signaling pathway, Bacterial blight resistance, Spikelet development	AT5G46760	MYC3; Transcription factor MYC3
TraesCS1B02G225700	Expansin protein	Os10g0555600	Beta-expansin precursor	AT3G60570	EXPB5; Expansin-B5
TraesCS1D02G101600	40S ribosomal protein S4	Os05g0368300	Similar to 40S ribosomal protein S4, X isoform (Single copy abundant mRNA protein) (SCR10)	AT5G07090	RPS4B; 40S ribosomal protein S4-2
TraesCS1D02G107000	Peroxisomal membrane (Mpv17/PMP22) family protein
TraesCS1D02G261800	NAC domain-containing protein	Os05g0418800	No apical meristem (NAM) protein domain containing protein
TraesCS1D02G273100	Transcription factor	Os05g0437700	Similar to G-box-binding factor 4	AT1G43700	VIP1; Transcription factor VIP1
TraesCS2A02G058100	Acidic chitinase
TraesCS2A02G066900	Ribulose bisphosphate carboxylase small chain	Os12g0291400	Similar to Petunia ribulose 1,5-bisphosphate carboxylase small subunit mRNA (clone pSSU 51), partial cds. (Fragment)
TraesCS2A02G075000	Germin-like protein	Os08g0460000	Similar to Germin-like protein 1 precursor
TraesCS2A02G204800	Chlorophyll a-b binding protein, chloroplastic	Os07g0562700	Similar to Type III chlorophyll a/b-binding protein (Fragment)	AT5G54270	LHCB3; Chlorophyll a-b binding protein 3, chloroplastic
TraesCS2A02G215600	Basic helix-loop-helix transcription factor	Os07g0543000	Similar to Helix-loop-helix-like protein (Fragment)	AT5G54680	ILR3; Transcription factor ILR3
TraesCS2A02G223200	tRNA wybutosine-synthesizing protein 2/3/4	Os07g0515000	Similar to Met-10+ like family protein / kelch repeat-containing protein	AT4G04670	tRNA wybutosine-synthesizing protein 2/3/4
TraesCS2A02G571300	Peroxidase	Os04g0689000	Similar to Peroxidase (EC 1.11.1.7)
TraesCS2B02G090300	Germin-like protein	Os08g0460000	Similar to Germin-like protein 1 precursor
TraesCS2B02G234500	Cytochrome b6-f complex iron-sulfur subunit	Os07g0556200	petC; Rieske [2Fe-2S] region domain containing protein
TraesCS2B02G259100	NADH oxidoreductase F subunit	Os07g0645400	Similar to NADH-ubiquinone oxidoreductase 51 kDa subunit	AT5G08530	CI51; NADH dehydrogenase [ubiquinone] flavoprotein 1, mitochondrial
TraesCS2B02G282400	Sugar transporter, putative	Os07g0106200	MST3; Similar to Monosaccharide transporter 3
TraesCS2B02G289800	LOB domain-containing protein
TraesCS2B02G339800	Lipoxygenase domain-containing 1	Os04g0456300	Similar to H0523F07.7 protein
TraesCS2B02G528300	Glutamine synthetase	Os04g0659100	Glutamine synthetase shoot isozyme, chloroplast precursor (EC 6.3.1.2) (Glutamate--ammonia ligase) (Clone lambda-GS31)	AT5G16570	GLN1-4; Glutamine synthetase
TraesCS2D02G073700	Germin-like protein	Os08g0460000	Similar to Germin-like protein 1 precursor
TraesCS2D02G221200	Basic helix-loop-helix transcription factor	Os07g0543000	Similar to Helix-loop-helix-like protein (Fragment)	AT5G54680	ILR3; Transcription factor ILR3
TraesCS2D02G317800	Pathogenesis-related protein 1	Os03g0300400	Pathogen-related protein (JIOsPR10)
TraesCS2D02G386800	Multiprotein-bridging factor, putative	Os08g0366100	Similar to Endothelial differentiation-related factor 1 (EDF-1) (Multiprotein bridging factor 1) (MBF1)	AT2G42680	MBF1A
TraesCS3A02G140900	GDSL esterase/lipase	Os01g0214800	Lipase, GDSL domain containing protein	AT3G14820	GDSL esterase/lipase At3g14820
TraesCS3A02G141300	GDSL esterase/lipase	Os01g0215700	Esterase, SGNH hydrolase-type domain containing protein	AT3G14820	GDSL esterase/lipase At3g14820
TraesCS3A02G419400	Pathogenic type III effector avirulence factor Avr AvrRpt-cleavage: cleavage site protein	Os01g0914000	Conserved hypothetical protein
TraesCS3B02G154600	50S ribosomal protein L5	Os01g0205500	Similar to 60S ribosomal protein L11-2 (L16). Splice isoform 2	AT4G18730	RPL11C; 60S ribosomal protein L11-2
TraesCS3B02G277800	KRR1 small subunit processome component	Os01g0713800	Similar to RNA binding
TraesCS3B02G498900	Leucine-rich repeat receptor-like protein kinase family protein
TraesCS3B02G608500	Aquaporin	Os01g0975900	Similar to Tonoplast membrane integral protein ZmTIP1-2	AT4G01470	TIP1-3; Aquaporin TIP1-3
TraesCS3D02G146200	GDSL esterase/lipase	Os01g0214800	Lipase, GDSL domain containing protein	AT3G14820	GDSL esterase/lipase At3g14820
TraesCS3D02G383700	Fructose-bisphosphate aldolase	Os01g0905800	Aldolase C-1	AT2G36460	FBA6; Fructose-bisphosphate aldolase 6, cytosolic
TraesCS3D02G384000	Fructose-bisphosphate aldolase	Os01g0905800	Aldolase C-1	AT2G36460	FBA6; Fructose-bisphosphate aldolase 6, cytosolic
TraesCS3D02G451800	Leucine-rich repeat receptor-like protein kinase family protein
TraesCS3D02G467600	i	Os01g0937100	Similar to Xylanase inhibitor precursor (Xylanase inhibitor TAXI-I)
TraesCS4A02G055000	Leucine-rich repeat receptor protein kinase	Os03g0211900	Leucine-rich repeat, N-terminal domain containing protein	AT5G61240	Leucine-rich repeat (LRR) family protein
TraesCS4A02G123600	NADH:ubiquinone oxidoreductase subunit	Os03g0313000	Similar to NADH-ubiquinone oxidoreductase (Fragment)
TraesCS4A02G169100	Translationally-controlled tumor protein	Os11g0660500	Translationally controlled tumor protein, Mercury tolerance	AT3G16640	TCTP1; Translationally-controlled tumor protein 1
TraesCS4A02G220400	Proteasome subunit beta type	Os09g0515200	Beta 7 subunit of 20S proteasome
TraesCS4A02G320100	2-oxoglutarate (2OG) and Fe(II)-dependent oxygenase superfamily protein	Os03g0856000	2OG-Fe(II) oxygenase domain containing protein
TraesCS4A02G346900	Leucine-rich repeat receptor-like protein kinase
TraesCS4B02G212300	Heat-shock protein, putative	Os03g0266900	Low molecular mass heat shock protein Oshsp17.3	AT2G29500	HSP17.6B; 17.6 kDa class I heat shock protein 2
TraesCS4B02G226800	Pathogenesis-related thaumatin-like protein	Os03g0243900	Similar to Thaumatin-like protein	AT1G20030	Pathogenesis-related thaumatin superfamily protein
TraesCS4B02G276900	Basic helix-loop-helix (BHLH) family transcription factor
TraesCS4B02G364000	Acid phosphatase 1
TraesCS4D02G031800	Germin-like protein 1	Os03g0694000	Similar to Oxalate oxidase 1 (EC 1.2.3.4) (Germin)
TraesCS4D02G191400	40S ribosomal protein S7	Os03g0297100	40S ribosomal protein S7	AT3G02560	RPS7B; 40S ribosomal protein S7-2
TraesCS4D02G226000	Heat shock protein	Os03g0245800	Similar to Heat shock protein 26
TraesCS4D02G337300	Serine carboxypeptidase, putative
TraesCS5A02G052600	Glucan 1,3-beta-glucosidase	Os10g0370800	Similar to Exo-1,3-beta-glucanase precursor (EC 3.2.1.58) (Fragment)
TraesCS5A02G251800	Dof zinc finger protein	Os09g0475800	Transcriptional activator, Regulation of the C4 photosynthesis gene, OsC4PPDK
TraesCS5A02G545700	Invertase inhibitor	Os03g0100200	Transcriptional coactivator/pterin dehydratase family protein
TraesCS5B02G064000	Glucan 1,3-beta-glucosidase	Os10g0370800	Similar to Exo-1,3-beta-glucanase precursor (EC 3.2.1.58) (Fragment)
TraesCS5B02G162800	Ribulose bisphosphate carboxylase small chain	Os12g0291400	Similar to Petunia ribulose 1,5-bisphosphate carboxylase small subunit mRNA (clone pSSU 51), partial cds. (Fragment)
TraesCS5B02G169300	Heavy metal transport/detoxification protein	Os09g0272000	Heavy metal transport/detoxification protein domain containing protein	AT3G07600	HIPP16; Heavy metal-associated isoprenylated plant protein 16
TraesCS5B02G235600	BZIP transcription factor	Os09g0456200	Similar to BZIP transcription factor ABI5	AT3G19290	ABF4; ABRE binding factor 4
TraesCS5B02G266600	AT hook motif DNA-binding family protein	Os09g0491708	Protein of unknown function DUF296 domain containing protein
TraesCS5D02G054300	Germin-like protein	Os08g0189300	Germin-like protein 8-4, Disease resistance
TraesCS5D02G104600	Nucleoside diphosphate kinase	Os12g0548300	Nucleoside diphosphate kinase, Regulation of chloroplast development and chlorophyll biosynthesis, Abiotic stress response (ABA and salinity)
TraesCS5D02G173000	Coatomer protein complex, subunit zeta 1	Os09g0251450	Similar to Coatomer subunit zeta-2
TraesCS5D02G176400	Heavy metal transport/detoxification protein	Os09g0272000	Heavy metal transport/detoxification protein domain containing protein
TraesCS5D02G176600	Heavy metal transport/detoxification protein	Os09g0272000	Heavy metal transport/detoxification protein domain containing protein
TraesCS5D02G357600	Chlorophyll a-b binding protein, chloroplastic	Os01g0600900	Chlorophyll a-b binding protein 2, chloroplast precursor (LHCII type I CAB-2) (LHCP)	AT2G34420	LHB1B2; Chlorophyll a-b binding protein, chloroplastic
TraesCS5D02G408200	Chitinase
TraesCS5D02G491600	Zinc finger protein	Os03g0820300	TFIIIA-type zinc finger protein, Transcription activator, Abiotic stress tolerance
TraesCS6A02G045100	BHLH transcription factor	Os02g0116600	Helix-loop-helix DNA-binding domain containing protein
TraesCS6A02G208300	Ubiquitin-associated protein	Os02g0593700	Similar to Ubiquitin-associated protein	AT4G24690	NBR1; Protein NBR1 homolog
TraesCS6B02G060700	BHLH transcription factor	Os02g0116600	Helix-loop-helix DNA-binding domain containing protein
TraesCS6B02G104300	Transferase, transferring glycosyl groups
TraesCS6B02G420300	Cinnamoyl CoA reductase	Os02g0811400	Similar to Cinnamoyl CoA reductase
TraesCS6B02G450500	50S ribosomal protein L9	Os02g0822600	Similar to 50S ribosomal protein L9
TraesCS6B02G462400	Gibberellin-regulated family protein
TraesCS6D02G152700	Chlorophyll a-b binding protein, chloroplastic	Os02g0197600	Chlorophyll a/b-binding protein type III (Fragment)
TraesCS6D02G172900	Cytokinin oxidase/dehydrogenase	Os02g0220000	Similar to cytokinin oxidase1	AT5G56970	CKX3; Cytokinin dehydrogenase 3
TraesCS6D02G262700	ADP,ATP carrier protein, mitochondrial	Os02g0718900	ADP,ATP carrier protein, mitochondrial precursor (ADP/ATP translocase) (Adenine nucleotide translocator) (ANT)	AT3G08580	AAC1
TraesCS6D02G378000	Inosine-5'-monophosphate dehydrogenase	Os02g0818000	Similar to Brown planthopper-induced resistance protein 1
TraesCS7A02G113600	GDSL esterase/lipase	Os06g0156600	Lipase, GDSL domain containing protein
TraesCS7A02G178300	Germin-like protein	Os08g0460000	Similar to Germin-like protein 1 precursor
TraesCS7A02G189600	Nuclear migration protein nudC	Os06g0231300	CS domain domain containing protein
TraesCS7A02G198900	Pathogenesis-related protein 1	Os10g0191300	Similar to PR-1a pathogenesis related protein (Hv-1a) precursor
TraesCS7A02G223700	lipid-binding serum glycoprotein family protein	Os06g0309200	Similar to lipid binding protein
TraesCS7A02G237100	Chlorophyll a-b binding protein, chloroplastic	Os01g0600900	Chlorophyll a-b binding protein 2, chloroplast precursor (LHCII type I CAB-2) (LHCP)	AT2G34420	LHB1B2; Chlorophyll a-b binding protein, chloroplastic
TraesCS7A02G278700	Ribosomal protein	Os08g0558800	Similar to Ribosomal protein	AT2G27530	RPL10AB; 60S ribosomal protein L10a-2
TraesCS7A02G307700	BHLH transcription factor	Os08g0138500	Similar to Helix-loop-helix-like protein (Fragment)	AT5G54680	ILR3; Transcription factor ILR3
TraesCS7B02G208000	BHLH transcription factor	Os08g0138500	Similar to Helix-loop-helix-like protein (Fragment)	AT5G54680	ILR3; Transcription factor ILR3
TraesCS7B02G337300	Desiccation-related protein PCC13-62, putative, expressed
TraesCS7D02G108900	GDSL esterase/lipase	Os06g0156600	Lipase, GDSL domain containing protein
TraesCS7D02G111800	GDSL esterase/lipase	Os06g0157000	Esterase, SGNH hydrolase-type domain containing protein
TraesCS7D02G180200	Germin-like protein	Os08g0460000	Similar to Germin-like protein 1 precursor
TraesCS7D02G201400	Pathogenesis-related protein 1	Os10g0191300	Similar to PR-1a pathogenesis related protein (Hv-1a) precursor
TraesCS7D02G304500	BHLH transcription factor	Os08g0138500	Similar to Helix-loop-helix-like protein (Fragment)	AT5G54680	ILR3; Transcription factor ILR3
TraesCS7D02G554400	Ring finger protein	Os02g0832150	Similar to zinc finger (C3HC4-type RING finger) family protein
TraesCSU02G025800	Transferase, transferring glycosyl groups
TraesCSU02G056700	Non-specific lipid-transfer protein
TraesCSU02G056900	Non-specific lipid-transfer protein

## Sheet: Supplementary Table 6
Supplementary Table 6. The putative cis-element motif in 899bp sequence of TaDT1-AHapII
Site Name	Site Name	Organism	Position	Strand	Matrix score.	Sequence	Function
AAGAA-motif	AAGAA-motif	Avena sativa	225	+	7	GAAAGAA	-
ABRE	ABRE	Arabidopsis thaliana	283	+	6	CACGTG	cis-acting element involved in the abscisic acid responsiveness
	ABRE	Arabidopsis thaliana	525	-	6	CACGTG	cis-acting element involved in the abscisic acid responsiveness
	ABRE	Arabidopsis thaliana	284	+	5	ACGTG	cis-acting element involved in the abscisic acid responsiveness
	ABRE	Arabidopsis thaliana	526	+	5	ACGTG	cis-acting element involved in the abscisic acid responsiveness
	ABRE	Arabidopsis thaliana	127	+	5	ACGTG	cis-acting element involved in the abscisic acid responsiveness
	ABRE	Hordeum vulgare	523	-	9	GCAACGTGTC	cis-acting element involved in the abscisic acid responsiveness
AC-II	AC-II	Populus tremuloides	586	-	11	TCACCAACCCCC	-
CAAT-box	CAAT-box	Pisum sativum	332	+	5	CAAAT	common cis-acting element in promoter and enhancer regions
	CAAT-box	Pisum sativum	737	+	5	CAAAT	common cis-acting element in promoter and enhancer regions
	CAAT-box	Nicotiana glutinosa	359	-	4	CAAT	common cis-acting element in promoter and enhancer regions
	CAAT-box	Arabidopsis thaliana	801	+	5	CCAAT	common cis-acting element in promoter and enhancer regions
	CAAT-box	Nicotiana glutinosa	177	+	4	CAAT	common cis-acting element in promoter and enhancer regions
	CAAT-box	Pisum sativum	760	+	5	CAAAT	common cis-acting element in promoter and enhancer regions
	CAAT-box	Pisum sativum	573	+	5	CAAAT	common cis-acting element in promoter and enhancer regions
	CAAT-box	Nicotiana glutinosa	802	+	4	CAAT	common cis-acting element in promoter and enhancer regions
CAT-box	CAT-box	Arabidopsis thaliana	304	-	6	GCCACT	cis-acting regulatory element related to meristem expression
	CAT-box	Arabidopsis thaliana	550	-	6	GCCACT	cis-acting regulatory element related to meristem expression
CGTCA-motif	CGTCA-motif	Hordeum vulgare	125	-	5	CGTCA	cis-acting regulatory element involved in the MeJA-responsiveness
	CGTCA-motif	Hordeum vulgare	545	+	5	CGTCA	cis-acting regulatory element involved in the MeJA-responsiveness
G-Box	G-Box	Pisum sativum	525	-	6	CACGTG	cis-acting regulatory element involved in light responsiveness
	G-Box	Pisum sativum	283	+	6	CACGTG	cis-acting regulatory element involved in light responsiveness
G-box	G-box	Zea mays	126	-	6	CACGTC	cis-acting regulatory element involved in light responsiveness
	G-box	Brassica napus	524	+	9	ACACGTGGC	cis-acting regulatory element involved in light responsiveness
	G-box	Brassica napus	282	+	8	ACACGTGT	cis-acting regulatory element involved in light responsiveness
	G-box	Arabidopsis thaliana	525	-	6	CACGTG	cis-acting regulatory element involved in light responsiveness
	G-box	Zea mays	207	+	6	CACGAC	cis-acting regulatory element involved in light responsiveness
	G-box	Arabidopsis thaliana	283	+	6	CACGTG	cis-acting regulatory element involved in light responsiveness
GC-motif	GC-motif	Oryza sativa	3	-	9	AGCGCGCCG	-
GCN4_motif	GCN4_motif	Oryza sativa	67	-	7	TGAGTCA	cis-regulatory element involved in endosperm expression
MBS	MBS	Arabidopsis thaliana	653	-	6	CAACTG	MYB binding site involved in drought-inducibility
MRE	MRE	Petroselinum crispum	419	+	7	AACCTAA	MYB binding site involved in light responsiveness
MYC	MYC	Arabidopsis thaliana	573	-	6	CATTTG	-
Myb	Myb	Arabidopsis thaliana	653	-	6	CAACTG	-
NON	NON	Nicotiana tabacum	527	-	10	CAACGGCCACG	-
O2-site	O2-site	Zea mays	727	+	10	GATGATGTGG	cis-acting regulatory element involved in zein metabolism regulation
P-box	P-box	Oryza sativa	193	+	7	CCTTTTG	gibberellin-responsive element
	P-box	Oryza sativa	217	+	7	CCTTTTG	gibberellin-responsive element
TATA-box	TATA-box	Arabidopsis thaliana	389	+	4	TATA	core promoter element around -30 of transcription start
	TATA-box	Brassica napus	402	+	6	ATATAT	core promoter element around -30 of transcription start
	TATA-box	Arabidopsis thaliana	183	+	4	TATA	core promoter element around -30 of transcription start
	TATA-box	Arabidopsis thaliana	403	+	4	TATA	core promoter element around -30 of transcription start
TGACG-motif	TGACG-motif	Hordeum vulgare	125	+	5	TGACG	cis-acting regulatory element involved in the MeJA-responsiveness
	TGACG-motif	Hordeum vulgare	545	-	5	TGACG	cis-acting regulatory element involved in the MeJA-responsiveness
Unnamed__1	Unnamed__1	Zea mays	242	-	5	CGTGG	-
	Unnamed__1	Zea mays	527	+	5	CGTGG	-
	Unnamed__1	Petunia sp.	523	-	9	GCCACGTGGC	-
	Unnamed__1	Zea mays	533	+	5	CGTGG	-
Unnamed__2	Unnamed__2	Zea mays	115	+	6	CCCCGG	-
Unnamed__4	Unnamed__4	Petroselinum hortense	13	+	4	CTCC	-
	Unnamed__4	Petroselinum hortense	559	+	4	CTCC	-
	Unnamed__4	Petroselinum hortense	343	+	4	CTCC	-
	Unnamed__4	Petroselinum hortense	684	-	4	CTCC	-
	Unnamed__4	Petroselinum hortense	136	-	4	CTCC	-
	Unnamed__4	Petroselinum hortense	599	-	4	CTCC	-
	Unnamed__4	Petroselinum hortense	503	-	4	CTCC	-
	Unnamed__4	Petroselinum hortense	751	-	4	CTCC	-
	Unnamed__4	Petroselinum hortense	120	-	4	CTCC	-
	Unnamed__4	Petroselinum hortense	240	+	4	CTCC	-
WRE3	WRE3	Pisum sativum	567	+	6	CCACCT	-
WUN-motif	WUN-motif	Nicotiana glutinosa	610	+	9	TAATTACTC	-
as-1	as-1	Arabidopsis thaliana	125	+	5	TGACG	-
	as-1	Arabidopsis thaliana	545	-	5	TGACG	-

## Sheet: Supplementary Table 7
Supplementary Table 7. The geographical distribution of 1256 wheat accessions.
Varieties	VCF_ID	Longitude	Latitude	continents	Haplotype
23923	S125	40.4897	9.145	Africa	Hap II
TRI 25528	SAMEA10943944	32.248	15.3214	Africa	Hap I
TRI 1210	SAMEA10943960	32.2066	16.6682	Africa	Hap I
TRI 4495	SAMEA10944385	32.35	15.31	Africa	Hap I
TRI 4508	SAMEA10944080	32.35	15.31	Africa	Hap I
TRI 5447	SAMEA10943978	32.35	15.31	Africa	Hap I
TRI 6774	SAMEA10943972	32.35	15.31	Africa	Hap I
TRI 6790	SAMEA10944359	32.35	15.31	Africa	Hap I
TRI 7993	SAMEA10944127	32.35	15.31	Africa	Hap I
TRI 9666	SAMEA10944131	32.35	15.31	Africa	Hap I
TRI 1229	SAMEA10944547	32.35	15.31	Africa	Hap I
TRI 1243	SAMEA10944548	32.35	15.31	Africa	Hap I
TRI 3687	SAMEA10944558	32.35	15.31	Africa	Hap I
TRI 5206	SAMEA10944693	32.35	15.31	Africa	Hap I
TRI 5082	SAMEA10944588	32.35	15.31	Africa	Hap I
TRI 5085	SAMEA10944589	32.35	15.31	Africa	Hap I
TRI 6740	SAMEA10944599	32.35	15.31	Africa	Hap I
TRI 6747	SAMEA10944600	32.35	15.31	Africa	Hap I
TRI 6765	SAMEA10944695	32.35	15.31	Africa	Hap I
TRI 6775	SAMEA10944602	32.35	15.31	Africa	Hap I
TRI 9366	SAMEA10944638	32.35	15.31	Africa	Hap I
TRI 9367	SAMEA10944708	32.35	15.31	Africa	Hap I
TRI 9520	SAMEA10944642	32.35	15.31	Africa	Hap I
TRI 9522	SAMEA10944643	32.35	15.31	Africa	Hap I
TRI 9625	SAMEA10944646	32.35	15.31	Africa	Hap I
TRI 24604	SAMEA10944017	33.8582	16.8614	Africa	Hap I
TRI 24905	SAMEA10944049	31.048	16.3809	Africa	Hap I
TRI 22561	SAMEA10944056	32.1186	16.8127	Africa	Hap I
TRI 21111	SAMEA10944132	32.5812	15.2795	Africa	Hap I
TRI 23573	SAMEA10944374	32.6323	14.9417	Africa	Hap I
23909	S124	-7.0926	31.7917	Africa	Hap I
bendihuanghuamai	S242	102.007	29.7741	Asia	Hap II
YN156	S177	103.612	29.9108	Asia	Hap II
TRI 12340	SAMEA10944339	77.13	28.37	Asia	Hap II
TRI 12322	SAMEA10944087	77.13	28.37	Asia	Hap I
1696	S206	84.124	28.3949	Asia	Hap II
1697	S207	84.124	28.3949	Asia	Hap II
As1666	S94	102.141	28.1316	Asia	Hap II
YN098	S175	103.312	30.0254	Asia	Hap II
YT-32	S59	103.585	28.0681	Asia	Hap II
YN411	S179	102.414	29.8009	Asia	Hap II
As1658	S93	102.072	30.8826	Asia	Hap II
kangdingxiaomai	S249	103.709	29.0329	Asia	Hap II
YT-19	S57	102.238	29.6123	Asia	Hap II
As1587	S95	102.31	29.12	Asia	Hap II
As1635	S96	102.31	29.12	Asia	Hap II
As1588	S97	102.31	29.12	Asia	Hap II
As1668	S98	102.31	29.12	Asia	Hap II
As1661	S99	102.31	29.12	Asia	Hap II
As1670	S100	102.31	29.12	Asia	Hap II
honghuosui	S105	102.31	29.12	Asia	Hap II
baimuxiban	S104	102.31	29.12	Asia	Hap II
hongqimai	S101	102.31	29.12	Asia	Hap I
huoliyan	S251	102.31	29.12	Asia	Hap II
dabaimai	S103	102.31	29.12	Asia	Hap II
yizhimai	S250	102.31	29.12	Asia	Hap II
dabaitou	S106	102.31	29.12	Asia	Hap II
lanhuamai	S240	102.31	29.12	Asia	Hap II
duanyaomai	S102	102.31	29.12	Asia	Hap I
Zhushimai	SRR10766604	102.31	29.12	Asia	Hap II
Mianyang 15	SRR10766577	102.31	29.12	Asia	Hap II
Mianyang 26	SRR10766551	102.31	29.12	Asia	Hap II
Chengduguangtou	SRR10766522	102.31	29.12	Asia	Hap II
Chinses Spring	CRR062130	102.31	29.12	Asia	Hap II
Mianyang 11	SRR10766578	102.31	29.12	Asia	Hap I
Mianyang 20	SRR10766575	102.31	29.12	Asia	Hap I
Chuanmai 22	SRR10766573	102.31	29.12	Asia	Hap I
Wuyimai	SRR10766531	102.31	29.12	Asia	Hap I
Fan 6	SRR10766515	102.31	29.12	Asia	Hap I
Chuanmai 42	SRR10766500	102.31	29.12	Asia	Hap I
Baihuamai	SRR10766605	102.31	29.12	Asia	Hap II
Huoliyan	CRR062167	102.31	29.12	Asia	Hap II
Ganmai 8	SRR10766620	102.31	29.12	Asia	Hap I
Hezhoudamai	SRR10766616	102.31	29.12	Asia	Hap I
FMSY	SRR7164585	102.31	29.12	Asia	Hap II
HNSH	SRR7164587	102.31	29.12	Asia	Hap II
HMM	SRR7164655	102.31	29.12	Asia	Hap II
HM	SRR7164672	102.31	29.12	Asia	Hap II
ZP	SRR7164643	102.31	29.12	Asia	Hap II
TJBXM	SRR7164680	102.31	29.12	Asia	Hap II
BDHHM	SRR7164690	102.31	29.12	Asia	Hap II
DXHKYM	SRR7164591	102.31	29.12	Asia	Hap II
JM	SRR7164657	102.31	29.12	Asia	Hap I
nanda2419	S219	102.31	29.12	Asia	Hap II
fan6	S216	102.31	29.12	Asia	Hap I
YN109	S176	101.743	28.8281	Asia	Hap II
baimangxiaomai	S246	103.061	28.6718	Asia	Hap II
Paozimai	SRR10766612	115.72	29.79	Asia	Hap II
Xuzhou 14	SRR10766521	115.72	29.79	Asia	Hap II
Jiangdongmen	SRR10766530	115.72	29.79	Asia	Hap II
Wangshuibai	SRR10766504	115.72	29.79	Asia	Hap II
ZWT	SRR7164683	115.72	29.79	Asia	Hap II
MXM	SRR7164686	115.72	29.79	Asia	Hap II
WYM	SRR7164632	115.72	29.79	Asia	Hap II
LZT	SRR7164676	115.72	29.79	Asia	Hap II
SLZ	SRR7164639	115.72	29.79	Asia	Hap II
DYH	SRR7164584	115.72	29.79	Asia	Hap II
Chanbuzhi	SRR10766614	115.72	29.79	Asia	Hap II
YT-6	S6	101.469	28.0064	Asia	Hap II
YN241	S178	102.129	28.7574	Asia	Hap II
YT-31	S58	103.153	30.5437	Asia	Hap I
IG21134447	S204	36.2384	30.5852	Asia	Hap I
YT-2	S56	101.363	29.4684	Asia	Hap II
40b	CRR289941	49.5	30.9	Asia	Hap I
PNE 226-2	CRR290047	67	30.9	Asia	Hap II
PNE 226-1	CRR290102	67	30.9	Asia	Hap II
Type No. 14	CRR290061	72	31	Asia	Hap II
Type No. 7	CRR290074	72	31	Asia	Hap II
As1500	S81	89.9479	33.4307	Asia	Hap II
As1511	S51	89.4946	32.8473	Asia	Hap II
As1409	S77	91.8618	31.8414	Asia	Hap II
bianbachunmai6	S245	91.7206	31.5577	Asia	Hap II
As2064	S83	91.1505	32.3609	Asia	Hap II
langxiansuisuixiaomai15	S23	89.7451	32.4639	Asia	Hap II
XM001274	S2	89.4067	33.111	Asia	Hap II
motuoxiaomai	S244	91.8355	33.3854	Asia	Hap II
XM001203	S1	89.8214	31.7167	Asia	Hap II
Type No. 13	CRR290186	73.1	31.4	Asia	Hap II
longzizheda9	S42	89.4849	33.1313	Asia	Hap II
longzizheda57	S164	91.7566	32.4749	Asia	Hap II
tiegonghongmai	S14	91.4954	32.9685	Asia	Hap I
Wanmai19	CRR290015	117.2	31.5	Asia	Hap II
As1483	S79	89.2767	31.6726	Asia	Hap II
L8	CRR289950	120.3	31.8	Asia	Hap II
K17	CRR290006	120.3	31.8	Asia	Hap II
L3B	CRR290089	120.3	31.8	Asia	Hap II
K18	CRR290161	120.3	31.8	Asia	Hap II
As2050	S84	89.3856	32.2832	Asia	Hap II
Z1B10186	S262	89.735	33.6333	Asia	Hap II
Type No. 25	CRR290016	72.2	31.9	Asia	Hap II
Type No. 19H	CRR290268	72.2	31.9	Asia	Hap I
24184	S132	35.2332	31.9522	Asia	Hap I
Guang Siu Zi	CRR290068	118.8	32	Asia	Hap II
longzizheda28	S159	91.6866	33.6941	Asia	Hap I
Xinyang75256	CRR290050	114.1	32.1	Asia	Hap II
longzisuisuixiaomai10	S25	90.1825	32.441	Asia	Hap II
langxiansuisuixiaomai9	S22	89.1742	32.2102	Asia	Hap II
longzisuisuixiaomai23	S28	91.977	31.2178	Asia	Hap II
As1516	S72	90.741	33.2233	Asia	Hap II
Z1B27323	S258	91.0669	31.0736	Asia	Hap II
Z1B10164	S259	91.2667	32.1476	Asia	Hap II
As1503	S80	89.0233	31.969	Asia	Hap II
K397	CRR290262	74	32.6	Asia	Hap II
As1316	S47	89.7909	32.1308	Asia	Hap II
langxiansuisuixiaomai17	S24	90.36	32.78	Asia	Hap II
langxiansuisuixiaomai6	S143	90.36	32.78	Asia	Hap II
langxiansuisuixiaomai18	S144	90.36	32.78	Asia	Hap II
Z1B27331	S264	90.36	32.78	Asia	Hap II
Z1B10204	S265	90.36	32.78	Asia	Hap II
As1301	S46	90.36	32.78	Asia	Hap II
As1373	S74	90.36	32.78	Asia	Hap II
As1297	S76	90.36	32.78	Asia	Hap II
As1367	S75	90.36	32.78	Asia	Hap I
As1342	S86	90.36	32.78	Asia	Hap I
langxianzheda20	S39	90.36	32.78	Asia	Hap II
langxianzheda35	S40	90.36	32.78	Asia	Hap II
langxianzheda16	S152	90.36	32.78	Asia	Hap II
langxianzheda17	S153	90.36	32.78	Asia	Hap II
langxianzheda4	S38	90.36	32.78	Asia	Hap I
Z1B10236	S268	90.36	32.78	Asia	Hap II
sangrizheda21	S45	90.36	32.78	Asia	Hap I
sangrizheda3	S166	90.36	32.78	Asia	Hap I
sangrizheda4	S167	90.36	32.78	Asia	Hap I
sangrizheda6	S168	90.36	32.78	Asia	Hap I
sangrizheda7	S169	90.36	32.78	Asia	Hap I
As1405	S49	90.36	32.78	Asia	Hap II
As1407	S87	90.36	32.78	Asia	Hap II
jiachasuisuixiaomai8	S17	90.36	32.78	Asia	Hap II
jiachasuisuixiaomai27	S18	90.36	32.78	Asia	Hap II
jiachasuisuixiaomai32	S19	90.36	32.78	Asia	Hap II
jiachasuisuixiaomai33	S20	90.36	32.78	Asia	Hap II
jiachasuisuixiaomai34	S21	90.36	32.78	Asia	Hap II
jiachazheda55	S35	90.36	32.78	Asia	Hap II
XM001387	S3	90.36	32.78	Asia	Hap II
chayazheda14	S30	90.36	32.78	Asia	Hap II
chayazheda18	S31	90.36	32.78	Asia	Hap II
chayazheda19	S32	90.36	32.78	Asia	Hap II
chayazheda49	S145	90.36	32.78	Asia	Hap II
chayazheda32	S33	90.36	32.78	Asia	Hap I
Z1B10165	S260	90.36	32.78	Asia	Hap II
Z1B10166	S261	90.36	32.78	Asia	Hap II
As1348	S48	90.36	32.78	Asia	Hap II
As1508	S88	90.36	32.78	Asia	Hap II
longzizheda19	S43	90.36	32.78	Asia	Hap II
longzizheda15	S155	90.36	32.78	Asia	Hap II
longzizheda22	S156	90.36	32.78	Asia	Hap II
longzizheda62	S165	90.36	32.78	Asia	Hap II
Z1B10226	S266	90.36	32.78	Asia	Hap II
Z1B27330	S267	90.36	32.78	Asia	Hap II
zang1817	Zang1817	90.36	32.78	Asia	Hap II
longzizheda23	S157	90.36	32.78	Asia	Hap I
As1523	S52	90.36	32.78	Asia	Hap II
As1526	S89	90.36	32.78	Asia	Hap II
As1525	S90	90.36	32.78	Asia	Hap II
As1521	S91	90.36	32.78	Asia	Hap II
As1284	S92	90.36	32.78	Asia	Hap II
longzizheda23	S158	90.36	32.78	Asia	Hap II
longzizheda29	S160	90.36	32.78	Asia	Hap II
longzizheda34	S162	90.36	32.78	Asia	Hap II
longzizheda48	S163	90.36	32.78	Asia	Hap II
longzizheda27	S44	90.36	32.78	Asia	Hap I
langxianzheda35	S37	90.36	32.78	Asia	Hap II
langxianzheda5	S149	90.36	32.78	Asia	Hap II
langxianzheda7	S151	90.36	32.78	Asia	Hap II
langxianzheda25	S154	90.36	32.78	Asia	Hap II
langxianzheda6	S150	90.36	32.78	Asia	Hap I
jiachazheda9	S34	90.36	32.78	Asia	Hap II
jiachazheda28	S36	90.36	32.78	Asia	Hap II
jiachazheda28	S146	90.36	32.78	Asia	Hap II
jiachazheda37	S147	90.36	32.78	Asia	Hap II
jiachazheda39	S148	90.36	32.78	Asia	Hap II
muzongzhuoga	S248	90.36	32.78	Asia	Hap II
Z1B10122	S255	90.36	32.78	Asia	Hap II
Z1B27343	S256	90.36	32.78	Asia	Hap II
Z1B10123	S257	90.36	32.78	Asia	Hap II
zang1817	Zang1817	90.36	32.78	Asia	Hap II
xizangmisui	S13	90.36	32.78	Asia	Hap I
xiaomai	S111	90.36	32.78	Asia	Hap II
xiaohongmai	S110	90.36	32.78	Asia	Hap II
liuyuehuang	S113	90.36	32.78	Asia	Hap II
maohongmai	S112	90.36	32.78	Asia	Hap II
duanbaimai	S114	90.36	32.78	Asia	Hap I
gejiaxiang	S241	90.36	32.78	Asia	Hap I
AS1772	S5	90.36	32.78	Asia	Hap I
AS1289	S4	90.36	32.78	Asia	Hap II
Gatuo	SRR10766619	90.36	32.78	Asia	Hap II
Galaohan	SRR10766608	90.36	32.78	Asia	Hap I
GYWLL	SRR7164642	90.36	32.78	Asia	Hap II
rikeze54	S229	90.36	32.78	Asia	Hap II
rikeze8	S230	90.36	32.78	Asia	Hap II
zangdong4	S228	90.36	32.78	Asia	Hap I
As1494	S50	91.9121	31.7517	Asia	Hap II
longzisuisuixiaomai17	S27	90.76	33.9108	Asia	Hap II
longzizheda32	S161	90.0227	33.395	Asia	Hap II
Wanyuanxuan9	CRR289938	112.52	33	Asia	Hap II
Wanyuanbai1	CRR290127	112.52	33	Asia	Hap II
As1340	S78	91.7982	33.0281	Asia	Hap II
Hongyouzi	CRR289963	111.48	33.13	Asia	Hap II
Hawasia	CRR289929	43.7	33.2	Asia	Hap I
Homara Mania	CRR289967	43.7	33.2	Asia	Hap I
Yosifia	CRR289970	43.7	33.2	Asia	Hap I
Homara	CRR289982	43.7	33.2	Asia	Hap I
Mania	CRR289983	43.7	33.2	Asia	Hap I
Kendiharia	CRR290072	43.7	33.2	Asia	Hap I
W157	CRR289916	75.6	33.2	Asia	Hap II
Shan229	CRR290066	107.25	33.3	Asia	Hap II
Luomai6	CRR290055	114	33.3	Asia	Hap I
TRI 11635	SAMEA10944081	73.1	33.4	Asia	Hap II
TRI 11742	SAMEA10944390	73.1	33.4	Asia	Hap II
TRI 11649	SAMEA10944130	73.1	33.4	Asia	Hap I
TRI 11739	SAMEA10944136	73.1	33.4	Asia	Hap I
W168	CRR290114	75.8	33.4	Asia	Hap II
W167	CRR290240	75.8	33.4	Asia	Hap II
Zhoumai13	CRR289994	114.4	33.4	Asia	Hap I
Huaimai22	CRR290117	119	33.4	Asia	Hap I
Huaimai25	CRR290253	119	33.4	Asia	Hap I
Shanyou225	CRR289992	109.247	34.3519	Asia	Hap I
zhahong	S243	90.9654	33.5845	Asia	Hap II
zuogongsuisuixiaomai1	S16	91.0109	31.5449	Asia	Hap II
Yu Hua Zi	CRR290195	119.8	33.5	Asia	Hap II
IWA8604850	CRR290237	46.5	33.6	Asia	Hap II
FAO 33.214	CRR290250	73.1	33.6	Asia	Hap II
As1513	S73	89.6174	33.4177	Asia	Hap I
Xiaoyan92	CRR289944	108.608	34.6313	Asia	Hap II
As2065	S82	89.5532	32.549	Asia	Hap II
longzisuisuixiaomai24	S29	91.5394	31.4762	Asia	Hap II
longzisuisuixiaomai11	S26	90.6013	32.5876	Asia	Hap II
wujiangzhuo	S247	89.403	31.322	Asia	Hap II
TRI 10471	SAMEA10944665	69	34	Asia	Hap II
TRI 3364	SAMEA10944669	69	34	Asia	Hap I
Shan253	CRR290133	108.04	34.16	Asia	Hap II
Jimai 20	CRR062080	115.859	35.1132	Asia	Hap I
Xinong2611	CRR290141	108	34.2	Asia	Hap II
Xiaoyan926	CRR290172	108.6	34.2	Asia	Hap II
Yuanfeng175	CRR290183	108.6	34.2	Asia	Hap II
Xiaoyan39	CRR290242	108.6	34.2	Asia	Hap II
Xiaoyan15	CRR290019	108.6	34.2	Asia	Hap I
Xiaoyan4	CRR290106	108.6	34.2	Asia	Hap I
Xiaoyan503	CRR290148	108.6	34.2	Asia	Hap I
W120	CRR290181	76.15	34.22	Asia	Hap II
Jinan 13	SRR10766567	116.065	35.6956	Asia	Hap II
IWA8607807	CRR290077	47.1	34.3	Asia	Hap II
Qinmai11	CRR290156	107.15	34.38	Asia	Hap II
Gandom-i-Safade	CRR289986	67	34.4	Asia	Hap II
W125	CRR290164	76.3	34.4	Asia	Hap II
Luohan8	CRR290065	112.3	34.4	Asia	Hap II
Luomai21	CRR290182	112.3	34.4	Asia	Hap II
Luohan11	CRR290171	112.3	34.4	Asia	Hap I
Luohan13	CRR290241	112.3	34.4	Asia	Hap I
Zhengyumai9987	CRR290032	113.4	34.4	Asia	Hap II
Zhengmai9405	CRR290194	113.4	34.4	Asia	Hap II
Zhengmai0856	CRR290218	113.4	34.4	Asia	Hap II
Zhengzi8709-4-4	CRR289931	113.4	34.4	Asia	Hap I
Zhengyou7	CRR290017	113.4	34.4	Asia	Hap I
Zhengzhou6903	CRR290112	113.4	34.4	Asia	Hap I
Zhengmai005	CRR290137	113.4	34.4	Asia	Hap I
Zhengmai336	CRR290208	113.4	34.4	Asia	Hap I
Zhengmai1066	CRR290210	113.4	34.4	Asia	Hap I
BS21	S60	117.567	34.5727	Asia	Hap II
Liangxing 99	SRR10766492	117.083	34.8192	Asia	Hap I
Gandom-i-Safadek	CRR290103	65.5	34.5	Asia	Hap II
Shan150	CRR290199	109	34.5	Asia	Hap II
Lankao86	CRR290101	114.5	34.5	Asia	Hap II
Lankaoaizao8	CRR290135	114.5	34.5	Asia	Hap II
dalibanmang	S187	116.637	36.8782	Asia	Hap II
Gandom	CRR289940	65.8	34.6	Asia	Hap II
Yumai62	CRR290000	113	34.6	Asia	Hap II
Yumai57	CRR289925	113	34.6	Asia	Hap I
Yumai34	CRR290003	113	34.6	Asia	Hap I
Yumai14	CRR290178	113	34.6	Asia	Hap I
Yuejin 5	CRR062172	117.995	35.9827	Asia	Hap II
C-1	CRR290150	36.7	34.7	Asia	Hap I
BS23	S61	115.096	34.0707	Asia	Hap II
Yunong416	CRR290221	113.65	34.76	Asia	Hap II
ningyang5	S15	116.272	35.9592	Asia	Hap II
Damaskus 6	CRR290018	39	34.8	Asia	Hap I
Aleppo 32	CRR290073	39	34.8	Asia	Hap I
Aleppo 1	CRR290214	39	34.8	Asia	Hap I
IWA8608636	CRR290069	48.6	34.8	Asia	Hap II
xiaosanyuehuang	S184	115.321	35.9798	Asia	Hap II
Aimengniu	SRR10766512	115.409	36.4064	Asia	Hap II
Yuzhan89106	CRR290030	114.28	35	Asia	Hap I
pingyuan50	S10	117.382	34.1308	Asia	Hap II
D-2	CRR290187	36.8	35.1	Asia	Hap I
Changwu131	CRR290174	107.5	35.1	Asia	Hap I
Jiaomai668	CRR290012	113.1	35.1	Asia	Hap II
Xiaoyan55	CRR290093	109.275	33.1194	Asia	Hap II
Xinmai9817	CRR289942	113.6	35.2	Asia	Hap II
Xinmai18	CRR289959	113.6	35.2	Asia	Hap II
IWA8608766	CRR290154	47	35.3	Asia	Hap I
86PK1287-001.14	CRR290207	75.5	35.3	Asia	Hap II
mazhamai	S183	117.527	36.2623	Asia	Hap II
Mexipak 66	SRR10766514	75.5333	35.3167	Asia	Hap I
TRI 5804	SAMEA10944060	51.3	35.44	Asia	Hap I
TRI 5807	SAMEA10944373	51.3	35.44	Asia	Hap I
TRI 6414	SAMEA10943998	51.3	35.44	Asia	Hap I
TRI 6430	SAMEA10943963	51.3	35.44	Asia	Hap I
TRI 6454	SAMEA10944064	51.3	35.44	Asia	Hap I
TRI 6487	SAMEA10944020	51.3	35.44	Asia	Hap I
TRI 6610	SAMEA10944343	51.3	35.44	Asia	Hap I
TRI 9674	SAMEA10944142	51.3	35.44	Asia	Hap I
TRI 6376	SAMEA10944595	51.3	35.44	Asia	Hap I
TRI 6382	SAMEA10944596	51.3	35.44	Asia	Hap I
TRI 6389	SAMEA10944694	51.3	35.44	Asia	Hap I
TRI 6655	SAMEA10944597	51.3	35.44	Asia	Hap I
Zhengpinmai25	CRR290034	115	35.5	Asia	Hap I
IWA8604270	CRR289952	47	35.6	Asia	Hap II
Tirmai	CRR290042	69.5	35.6	Asia	Hap II
Jimai 19	CRR062092	117.033	34.8775	Asia	Hap I
Jimai 22	CRR062096	116.408	35.2487	Asia	Hap I
23977	S128	104.286	35.7518	Asia	Hap I
23989	S129	104.286	35.7518	Asia	Hap I
Jinan 9	SRR10766532	117.158	36.2308	Asia	Hap I
chunxiaomai	S182	117.909	34.9339	Asia	Hap II
xishanbiansui	S185	117.425	36.2044	Asia	Hap II
BS49	S62	116.504	34.359	Asia	Hap II
Yannong 21	SRR10766490	116.4	35.88	Asia	Hap I
Zijiehong	SRR10766610	116.4	35.88	Asia	Hap I
Jining 3	SRR10766601	116.4	35.88	Asia	Hap I
Fengchan 3	SRR10766499	116.4	35.88	Asia	Hap II
Xian 8	SRR10766580	116.4	35.88	Asia	Hap II
Shaannong 7859	SRR10766570	116.4	35.88	Asia	Hap II
Xinong 979	CRR062104	116.4	35.88	Asia	Hap II
Mazhamai	CRR062114	116.4	35.88	Asia	Hap II
Xiaoyan 6	SRR10766513	116.4	35.88	Asia	Hap II
Shaan 213	SRR10766595	116.4	35.88	Asia	Hap II
Xinong 881	SRR10766592	116.4	35.88	Asia	Hap II
Xiaoyan 96	SRR10766590	116.4	35.88	Asia	Hap II
Aifeng 3	SRR10766588	116.4	35.88	Asia	Hap II
Bima 1	CRR062047	116.4	35.88	Asia	Hap I
Bima 4	CRR062111	116.4	35.88	Asia	Hap I
Xinong 6028	SRR10766525	116.4	35.88	Asia	Hap I
Xiaoyan 22	SRR10766624	116.4	35.88	Asia	Hap I
Xinong 65	SRR10766597	116.4	35.88	Asia	Hap I
Neixiang 5	SRR10766554	116.4	35.88	Asia	Hap II
Yumai 17	SRR10766579	116.4	35.88	Asia	Hap II
Wenmai 6	SRR10766557	116.4	35.88	Asia	Hap II
Yumai 41	SRR10766552	116.4	35.88	Asia	Hap II
Zhoumai 18	CRR062095	116.4	35.88	Asia	Hap II
Zhengmai 9023	CRR062098	116.4	35.88	Asia	Hap II
Bainong AK 58	CRR062102	116.4	35.88	Asia	Hap II
Youzimai	SRR10766524	116.4	35.88	Asia	Hap II
Zhou 8425B	SRR10766511	116.4	35.88	Asia	Hap II
Fumai	SRR10766503	116.4	35.88	Asia	Hap II
Xinmai 26	SRR10766489	116.4	35.88	Asia	Hap II
Bainong 201	SRR10766630	116.4	35.88	Asia	Hap II
Yanzhan 4110	SRR10766626	116.4	35.88	Asia	Hap II
Youzitou	SRR10766617	116.4	35.88	Asia	Hap II
Guangtoubaishenmai	SRR10766615	116.4	35.88	Asia	Hap II
Sanyuehuang	SRR10766611	116.4	35.88	Asia	Hap II
Yumai 47	SRR10766599	116.4	35.88	Asia	Hap II
Bainong 791	SRR10766586	116.4	35.88	Asia	Hap II
Mengxian 201	SRR10766583	116.4	35.88	Asia	Hap II
Boai 7023	SRR10766543	116.4	35.88	Asia	Hap I
Yumai 13	SRR10766587	116.4	35.88	Asia	Hap I
Yumai 7	SRR10766581	116.4	35.88	Asia	Hap I
Bainong 3217	SRR10766571	116.4	35.88	Asia	Hap I
Yumai 2	SRR10766569	116.4	35.88	Asia	Hap I
Zhoumai 9	SRR10766555	116.4	35.88	Asia	Hap I
Yumai 18	SRR10766553	116.4	35.88	Asia	Hap I
Zhengmai 366	SRR10766546	116.4	35.88	Asia	Hap I
Zhoumai 22	CRR062101	116.4	35.88	Asia	Hap I
Zhoumai 16	CRR062103	116.4	35.88	Asia	Hap I
Fengdecunmai 5	SRR10766501	116.4	35.88	Asia	Hap I
Bainong 4199	SRR10766629	116.4	35.88	Asia	Hap I
Yanshi 4	SRR10766600	116.4	35.88	Asia	Hap I
VA_ZhouMai18	C42	116.4	35.88	Asia	Hap I
TMM	SRR7164641	116.4	35.88	Asia	Hap II
DKM	SRR7164673	116.4	35.88	Asia	Hap II
YZM	SRR7164675	116.4	35.88	Asia	Hap II
XFS	SRR7164682	116.4	35.88	Asia	Hap II
LGD	SRR7164653	116.4	35.88	Asia	Hap II
QCM	SRR7164661	116.4	35.88	Asia	Hap II
YNSW	SRR7256797	116.4	35.88	Asia	Hap I
ZJH	SRR7164648	116.4	35.88	Asia	Hap I
CSB	SRR7164589	116.4	35.88	Asia	Hap I
LLX	SRR7256781	116.4	35.88	Asia	Hap I
fengchan3hao	S214	116.4	35.88	Asia	Hap II
zhengmai9023	S217	116.4	35.88	Asia	Hap II
yanzhan1	S218	116.4	35.88	Asia	Hap II
taishan1	S220	116.4	35.88	Asia	Hap II
zhengyin4	S223	116.4	35.88	Asia	Hap II
zhoumai18	S135	116.4	35.88	Asia	Hap I
yannong15	S136	116.4	35.88	Asia	Hap I
lumai21	S137	116.4	35.88	Asia	Hap I
yumai18	S139	116.4	35.88	Asia	Hap I
bima4	S213	116.4	35.88	Asia	Hap I
jinan17	S215	116.4	35.88	Asia	Hap I
yumai21	S221	116.4	35.88	Asia	Hap I
bainong3217	S224	116.4	35.88	Asia	Hap I
jinmai47	S270	116.4	35.88	Asia	Hap I
jimai22	S272	116.4	35.88	Asia	Hap I
Red Kamsereti	CRR290155	74.3	35.9	Asia	Hap I
86PK1304-001.00	CRR290013	74.4	36	Asia	Hap I
Jinan 17	SRR10766558	117.234	36.1808	Asia	Hap I
Yannong 19	SRR10766562	117.208	34.4481	Asia	Hap I
Chang6154	CRR289976	113.1	36.1	Asia	Hap I
Chang6359	CRR290266	113.1	36.1	Asia	Hap I
Taishan4033	CRR289997	117	36.1	Asia	Hap I
Shannong20	CRR289948	117.1	36.1	Asia	Hap I
Lumai5	CRR290043	117.1	36.1	Asia	Hap I
Liangxing 66	SRR10766493	117.452	36.3502	Asia	Hap I
86PK1307-001.00	CRR290224	74.4	36.2	Asia	Hap II
PH 82-2-2	SRR10766593	117.282	35.2957	Asia	Hap II
IWA8612682	CRR290107	59.6	36.3	Asia	Hap II
86PK1308-001.11	CRR290255	74.5	36.3	Asia	Hap II
86PK1308-001.07	CRR289914	74.5	36.3	Asia	Hap I
Changhe24	CRR290100	113.1	36.3	Asia	Hap II
Hanmai13	CRR289957	114.3	36.4	Asia	Hap I
Han4589	CRR290267	114.3	36.4	Asia	Hap I
K35	CRR289917	117	36.4	Asia	Hap I
Jishi42	CRR290238	117	36.4	Asia	Hap I
baibiansui	S186	116.075	36.9645	Asia	Hap II
Shannongfu 63	SRR10766574	116.316	35.8881	Asia	Hap I
Lumai 15	CRR062089	115.36	34.9256	Asia	Hap I
laolaixia	S188	117.613	34.9624	Asia	Hap II
Lumai 21	SRR10766563	115.513	34.6039	Asia	Hap I
Lumai 14	SRR10766609	117.712	36.0913	Asia	Hap I
IWA8604628	CRR290122	54.5	36.8	Asia	Hap II
Jinan 2	SRR10766565	116.497	35.1079	Asia	Hap I
Taishan 1	SRR10766631	116.058	36.941	Asia	Hap II
Jinan 16	CRR062079	115.55	36.4441	Asia	Hap II
TJK03-194	CRR289947	71.6	37.4	Asia	Hap I
TJK03-195	CRR289980	71.6	37.4	Asia	Hap I
Dame	CRR289969	45.2	37.5	Asia	Hap II
Jinnong207	CRR290076	112.3	37.5	Asia	Hap II
Jinmai49	CRR290153	112.3	37.5	Asia	Hap I
TJK03-295	CRR290120	71.7	38	Asia	Hap I
TJK03-296	CRR290159	71.7	38	Asia	Hap I
Shi5033	CRR289979	114.3	38	Asia	Hap II
ShiB05-7388	CRR289965	114.3	38	Asia	Hap I
Jimai585	CRR289984	114.3	38	Asia	Hap I
Kenong199	CRR290082	114.3	38	Asia	Hap I
Kenong1006	CRR290151	114.3	38	Asia	Hap I
Shixin828	CRR290231	114.3	38	Asia	Hap I
Shixin733	CRR290257	114.3	38	Asia	Hap I
Aizao8	CRR290079	114.48	38.03	Asia	Hap II
Kenong2007	CRR290204	114.52	38.05	Asia	Hap I
Kenong9204	CRR290209	114.52	38.05	Asia	Hap I
TRI 13101	SAMEA10944044	117.453	39.461	Asia	Hap II
PYEQ	SRR7164681	114.798	39.4157	Asia	Hap I
TRI 2519	SAMEA10944555	115.397	38.8783	Asia	Hap II
TJK04-3	CRR289932	68.7	38.4	Asia	Hap II
Shijiazhuang 54	CRR062048	112.834	40.2062	Asia	Hap I
TJK04-379	CRR289928	69.2	38.5	Asia	Hap II
Henong825	CRR290177	115.3	38.5	Asia	Hap II
Jimai 30	SRR10766598	112.526	39.8431	Asia	Hap I
Shi 4185	CRR062097	112.45	38.8845	Asia	Hap II
TRI 9571	SAMEA10944093	115.863	38.6324	Asia	Hap II
dingxingzhai	S180	112.762	40.4616	Asia	Hap II
23971	S126	71.2761	38.861	Asia	Hap II
23974	S127	71.2761	38.861	Asia	Hap II
TJK2006:204	CRR289943	71.3	38.9	Asia	Hap II
ZYJWLQ	SRR7164689	114.642	39.4557	Asia	Hap II
TJK04-420	CRR290215	68.8	39	Asia	Hap II
Hong Huo Mai	CRR290029	116	39	Asia	Hap II
TRI 16936	SAMEA10944389	125.3	39.09	Asia	Hap II
yanda1817	S11	114.487	39.7264	Asia	Hap II
TRI 8117	SAMEA10944337	116.355	40.1082	Asia	Hap II
TJK2006:335	CRR289968	68.7	39.2	Asia	Hap II
TJK2006:354	CRR290162	69.1	39.2	Asia	Hap I
TJK2006:291	CRR290121	68.7	39.4	Asia	Hap I
TJK2006:298	CRR290152	68.7	39.4	Asia	Hap I
Baishanmai	SRR10766618	113.838	40.4045	Asia	Hap II
Nongda135	CRR290021	116.2	39.5	Asia	Hap II
Z39-Dalilengjiao	CRR290041	116.2	39.5	Asia	Hap II
Nongda1193	CRR290193	116.2	39.5	Asia	Hap II
Xiaobaimang	CRR290197	116.7	39.52	Asia	Hap II
TRI 3348	SAMEA10944668	116.2	39.55	Asia	Hap II
TRI 4526	SAMEA10944564	116.2	39.55	Asia	Hap II
TRI 8058	SAMEA10944702	116.2	39.55	Asia	Hap II
TRI 8075	SAMEA10944630	116.2	39.55	Asia	Hap II
TRI 9569	SAMEA10944644	116.2	39.55	Asia	Hap II
TRI 23706	SAMEA10944356	116.2	39.55	Asia	Hap I
TRI 23795	SAMEA10944349	116.2	39.55	Asia	Hap I
TRI 8054	SAMEA10944348	116.2	39.55	Asia	Hap I
TRI 8076	SAMEA10943984	116.2	39.55	Asia	Hap I
TRI 1414	SAMEA10944721	116.2	39.55	Asia	Hap I
TRI 3341	SAMEA10944718	116.2	39.55	Asia	Hap I
TRI 3343	SAMEA10944667	116.2	39.55	Asia	Hap I
TRI 8070	SAMEA10944629	116.2	39.55	Asia	Hap I
TRI 8079	SAMEA10944703	116.2	39.55	Asia	Hap I
TRI 8116	SAMEA10944632	116.2	39.55	Asia	Hap I
Hulutou	CRR290085	116.06	39.56	Asia	Hap II
Gaoyou 503	SRR10766549	112.55	38.1199	Asia	Hap II
CZ6406	SRR7164691	113.58	39.66	Asia	Hap I
KFEH	SRR7164652	113.58	39.66	Asia	Hap I
BJBH	SRR7256741	113.58	39.66	Asia	Hap I
Yanda 1817	CRR062105	113.58	39.66	Asia	Hap II
Zhongyou 9507	SRR10766494	113.58	39.66	Asia	Hap II
Beijing 8	SRR10766520	113.58	39.66	Asia	Hap I
Zhongmai 66	SRR10766502	113.58	39.66	Asia	Hap I
Zhongmai 175	SRR10766496	113.58	39.66	Asia	Hap I
Lunxuan 987	SRR10766625	113.58	39.66	Asia	Hap I
Kechun 14	SRR10766591	113.58	39.66	Asia	Hap I
shi4185	S64	113.58	39.66	Asia	Hap II
nongda3338	S67	113.58	39.66	Asia	Hap II
shiruan02-1	S142	113.58	39.66	Asia	Hap II
nongda3331	S3331	113.58	39.66	Asia	Hap II
nongda5181	S140	113.58	39.66	Asia	Hap I
changzhi6406	S209	113.58	39.66	Asia	Hap I
luofulin10	S212	113.58	39.66	Asia	Hap I
beijing8	S225	113.58	39.66	Asia	Hap I
shijiazhuang54	S227	113.58	39.66	Asia	Hap I
lunxuan987	S271	113.58	39.66	Asia	Hap I
jing411	S273	113.58	39.66	Asia	Hap I
nongda3097	YM03	113.58	39.66	Asia	Hap I
jingdong6	S6554	113.58	39.66	Asia	Hap I
Jimai 26	SRR10766566	114.164	39.7945	Asia	Hap II
baihuomai	S181	113	39.2257	Asia	Hap II
Hengguan 35	CRR062100	113.028	39.8095	Asia	Hap II
Shijiazhuang 8	SRR10766623	112.796	39.4441	Asia	Hap II
23891	S122	45.0382	40.0691	Asia	Hap II
Jinmai 47	SRR10766495	112.725	40.7294	Asia	Hap I
Shiluan 02-1	SRR10766497	113.503	40.6578	Asia	Hap II
Chul	CRR289962	67.83	40.1	Asia	Hap I
24193	S134	47.5769	40.1431	Asia	Hap I
TRI 3377	SAMEA10944670	115.389	38.5735	Asia	Hap II
TRI 13099	SAMEA10944104	116.423	39.2466	Asia	Hap II
DHM	SRR7164684	112.104	39.9053	Asia	Hap II
TRI 14915	SAMEA10944369	117.064	39.4176	Asia	Hap II
TRI 2422	SAMEA10943992	116.83	38.3124	Asia	Hap II
Gaocheng 8901	SRR10766498	112.445	38.8067	Asia	Hap II
Handan 6172	SRR10766545	112.694	40.8988	Asia	Hap I
BQM	SRR7164674	113.773	40.5266	Asia	Hap II
Jimai 38	SRR10766548	113.774	38.3487	Asia	Hap II
Jinmai 10	SRR10766596	112.046	38.4487	Asia	Hap I
hongchunmai	S252	84.72	41.35	Asia	Hap I
XHP	SRR7164633	110.76	41.86	Asia	Hap II
HLM	SRR7256757	110.76	41.86	Asia	Hap I
K2003-8	CRR290176	76.7	43.2	Asia	Hap I
Xinkehan 9	CRR062069	122.78	44.79	Asia	Hap II
Laogaidaqingmang	SRR10766622	122.78	44.79	Asia	Hap I
JCYLYL	SRR7164679	122.78	44.79	Asia	Hap II
BYM	SRR7164588	122.78	44.79	Asia	Hap II
YM	SRR7164646	122.78	44.79	Asia	Hap II
KFSH	SRR7164634	122.78	44.79	Asia	Hap I
K2003-55	CRR289978	66.9	48	Asia	Hap I
K2003-65	CRR290236	80.8	48	Asia	Hap I
K2003-108	CRR290139	84.7	49.2	Asia	Hap I
Kasisik	CRR290031	38.9	36.7	Eurasia	Hap I
Floransa	CRR289995	35.3	37	Eurasia	Hap I
Kilcikiz	CRR290138	36.9	37.2	Eurasia	Hap I
Kandihari	CRR289934	40.6	37.2	Eurasia	Hap II
Floransa C	CRR290198	35.6	37.3	Eurasia	Hap I
Floransa B	CRR290225	35.6	37.3	Eurasia	Hap I
Kirmizi Yazlik	CRR289933	40.7	37.9	Eurasia	Hap I
Sari	CRR290259	40.7	37.9	Eurasia	Hap I
TU86-14-04-1	CRR290027	42.1	38	Eurasia	Hap I
TU86-13-07	CRR290189	42.1	38	Eurasia	Hap I
84TK105-056.0	CRR290239	40	38.4	Eurasia	Hap I
84TK101-036.1	CRR289991	40.6	38.4	Eurasia	Hap I
Cankiri	CRR289953	39.3	38.6	Eurasia	Hap I
Karakilcik	CRR289930	44	38.7	Eurasia	Hap I
Kunduru Menceki	CRR290115	38.7	38.8	Eurasia	Hap I
23896	S123	35.2433	38.9637	Eurasia	Hap I
24056	S131	35.2433	38.9637	Eurasia	Hap I
IG21134349	S203	35.2433	38.9637	Eurasia	Hap I
TU85-082-01	CRR290230	41.5	39.1	Eurasia	Hap I
Tir	CRR290269	43.2	39.1	Eurasia	Hap II
TRI 22417	SAMEA10944386	32.54	39.57	Eurasia	Hap I
TRI 4642	SAMEA10944139	32.54	39.57	Eurasia	Hap I
TRI 7079	SAMEA10943947	32.54	39.57	Eurasia	Hap I
Normal Yumusak	CRR290105	39.5	39.8	Eurasia	Hap I
79TK112-1067B	CRR289918	41.3	40	Eurasia	Hap I
B-872	CRR290005	41.5	40	Eurasia	Hap I
B-941	CRR290173	41.5	40	Eurasia	Hap I
B-938	CRR290213	41.5	40	Eurasia	Hap I
79TK109-595	CRR290128	41.5	40.3	Eurasia	Hap I
Yumusak B	CRR290040	43.1	40.6	Eurasia	Hap I
79TK104-552B	CRR290020	43.1	40.8	Eurasia	Hap I
79TK104-548B	CRR290163	43.1	40.8	Eurasia	Hap I
79TK098-516	CRR290049	43.3	40.8	Eurasia	Hap I
79TK098-519A	CRR290098	43.3	40.8	Eurasia	Hap I
79TK100-531A-2	CRR290063	43.3	41	Eurasia	Hap I
TRI 4597	SAMEA10944567	23.46	37.58	Europe	Hap II
TRI 1621	SAMEA10944367	23.46	37.58	Europe	Hap I
TRI 3382	SAMEA10944556	23.46	37.58	Europe	Hap I
TRI 19729	SAMEA10944012	-9.1	38.42	Europe	Hap II
TRI 7560	SAMEA10944727	-3.45	40.25	Europe	Hap I
TRI 1458	SAMEA10944553	19.49	41.18	Europe	Hap II
TRI 3389	SAMEA10944557	19.49	41.18	Europe	Hap II
St 1472/506	SRR10766510	12.5674	41.8719	Europe	Hap II
Mentana	CRR062109	12.5674	41.8719	Europe	Hap II
Abbondanza	SRR10766518	12.5674	41.8719	Europe	Hap II
St 2422/464	SRR10766517	12.5674	41.8719	Europe	Hap II
Rieti	SRR10766508	12.5674	41.8719	Europe	Hap II
Mara	SRR10766603	12.5674	41.8719	Europe	Hap II
Fontarronco	SRR10766584	12.5674	41.8719	Europe	Hap II
Funo	SRR10766529	12.5674	41.8719	Europe	Hap I
Autonomia	SRR10766594	12.5674	41.8719	Europe	Hap I
Villa Glori	SRR10766589	12.5674	41.8719	Europe	Hap I
San Pastore	SRR10766585	12.5674	41.8719	Europe	Hap I
TRI 10389	SAMEA10944008	26.1	44.27	Europe	Hap I
TRI 10401	SAMEA10944336	26.1	44.27	Europe	Hap I
TRI 9781	SAMEA10944651	26.1	44.27	Europe	Hap I
TRI 9782	SAMEA10944652	26.1	44.27	Europe	Hap I
TRI 9814	SAMEA10944653	26.1	44.27	Europe	Hap I
TRI 9815	SAMEA10944654	26.1	44.27	Europe	Hap I
TRI 10139	SAMEA10944711	26.1	44.27	Europe	Hap I
TRI 10182	SAMEA10944712	26.1	44.27	Europe	Hap I
TRI 10408	SAMEA10944664	26.1	44.27	Europe	Hap I
TRI 6835	SAMEA10944055	26.1	44.27	Europe	Hap I
TRI 9661	SAMEA10944649	26.1	44.27	Europe	Hap I
TRI 9664	SAMEA10944650	26.1	44.27	Europe	Hap I
TRI 10354	SAMEA10944038	20.37	44.5	Europe	Hap I
TRI 10356	SAMEA10944662	21.37	45.5	Europe	Hap I
Apache	S12	2.2137	46.2276	Europe	Hap I
AZTEC	S235	2.2137	46.2276	Europe	Hap I
TRI 8121	SAMEA10944704	19.1115	48.635	Europe	Hap II
TRI 10357	SAMEA10944663	22.37	46.5	Europe	Hap I
TRI 5115	SAMEA10944691	18.5214	48.7322	Europe	Hap II
TRI 5136	SAMEA10944591	20.4569	47.3539	Europe	Hap II
Folklor	SAMEA10944442	3.43612	48.9305	Europe	Hap I
Dialog	SAMEA10944321	1.9014	49.3436	Europe	Hap I
TRI 9365	SAMEA10944637	19.05	47.29	Europe	Hap II
TRI 9656	SAMEA10944648	19.05	47.29	Europe	Hap II
TRI 19677	SAMEA10944109	19.05	47.29	Europe	Hap I
TRI 21226	SAMEA10944025	19.05	47.29	Europe	Hap I
TRI 1136	SAMEA10943999	19.05	47.29	Europe	Hap I
TRI 4767	SAMEA10944032	19.05	47.29	Europe	Hap I
TRI 180	SAMEA10944666	19.05	47.29	Europe	Hap I
TRI 4258	SAMEA10944562	19.05	47.29	Europe	Hap I
TRI 4772	SAMEA10944573	19.05	47.29	Europe	Hap I
TRI 4999	SAMEA10944684	19.05	47.29	Europe	Hap I
TRI 5012	SAMEA10944028	18.39	47.8174	Europe	Hap II
CF_99007	SAMEA10944319	2.4858	47.2465	Europe	Hap I
Mentor	SAMEA10944492	1.53105	47.9112	Europe	Hap I
TRI 10359	SAMEA10944005	23.37	47.5	Europe	Hap I
Memory	SAMEA10944331	3.98333	49.6274	Europe	Hap I
Lovrin 10	SRR10766516	26.7333	47.6833	Europe	Hap I
Linus	SAMEA10944485	1.53416	50.1601	Europe	Hap I
Antonius	SAMEA10944407	15.427	47.5502	Europe	Hap I
Altigo	SAMEA10944405	2.36656	47.6165	Europe	Hap I
Alexander	SAMEA10944404	3.65503	47.5362	Europe	Hap I
TRI 187	SAMEA10944111	3.05216	48.4526	Europe	Hap I
Fridolin	SAMEA10944444	16.22	48.12	Europe	Hap I
Globus	SAMEA10944448	16.22	48.12	Europe	Hap I
Vitus	SAMEA10944249	16.22	48.12	Europe	Hap I
Achat	SAMEA10944401	16.22	48.12	Europe	Hap I
TRI 13625	SAMEA10944114	16.22	48.12	Europe	Hap I
TRI 13649	SAMEA10944006	16.22	48.12	Europe	Hap I
TRI 13688	SAMEA10944010	16.22	48.12	Europe	Hap I
TRI 13706	SAMEA10944126	16.22	48.12	Europe	Hap I
TRI 16044	SAMEA10944091	16.22	48.12	Europe	Hap I
TRI 16635	SAMEA10944388	16.22	48.12	Europe	Hap I
TRI 16857	SAMEA10944103	16.22	48.12	Europe	Hap I
Xenos	SAMEA10944252	16.22	48.12	Europe	Hap I
TRI 341	SAMEA10943945	16.22	48.12	Europe	Hap I
TRI 7432	SAMEA10944073	16.22	48.12	Europe	Hap I
TRI 344	SAMEA10944539	16.22	48.12	Europe	Hap I
TRI 1205	SAMEA10944546	16.22	48.12	Europe	Hap I
TRI 1322	SAMEA10944550	16.22	48.12	Europe	Hap I
TRI 3702	SAMEA10944722	4.75821	50.5522	Europe	Hap I
Eriwan	SAMEA10944322	17.7663	47.2941	Europe	Hap I
Intact	SAMEA10944456	3.85151	47.236	Europe	Hap I
Rebell	SAMEA10944517	2.2	48.5	Europe	Hap I
Sailor	SAMEA10944526	2.2	48.5	Europe	Hap I
Solehio	SAMEA10944226	2.2	48.5	Europe	Hap I
Renan	SAMEA10944518	2.2	48.5	Europe	Hap I
Soissons	SAMEA10944537	2.2	48.5	Europe	Hap I
TRI 10147	SAMEA10943987	2.2	48.5	Europe	Hap I
TRI 10384	SAMEA10944363	2.2	48.5	Europe	Hap I
TRI 19524	SAMEA10944124	2.2	48.5	Europe	Hap I
TRI 21852	SAMEA10944370	2.2	48.5	Europe	Hap I
TRI 23876	SAMEA10943950	2.2	48.5	Europe	Hap I
TRI 24654	SAMEA10943967	2.2	48.5	Europe	Hap I
TRI 24798	SAMEA10944057	2.2	48.5	Europe	Hap I
TRI 9333	SAMEA10943969	2.2	48.5	Europe	Hap I
TRI 9993	SAMEA10944106	2.2	48.5	Europe	Hap I
TRI 9332	SAMEA10944636	2.2	48.5	Europe	Hap I
TRI 1017	SAMEA10944086	2.2	48.5	Europe	Hap I
TRI 4723	SAMEA10943951	2.2	48.5	Europe	Hap I
TRI 6717	SAMEA10943991	2.2	48.5	Europe	Hap I
TRI 7343	SAMEA10944033	2.2	48.5	Europe	Hap I
TRI 7597	SAMEA10944351	2.2	48.5	Europe	Hap I
TRI 7883	SAMEA10943953	2.2	48.5	Europe	Hap I
TRI 8304	SAMEA10944102	2.2	48.5	Europe	Hap I
TRI 1005	SAMEA10944542	2.2	48.5	Europe	Hap I
TRI 7014	SAMEA10944610	2.2	48.5	Europe	Hap I
TRI 5164	SAMEA10944692	2.2	48.5	Europe	Hap I
TRI 5230	SAMEA10944592	2.2	48.5	Europe	Hap I
TRI 5239	SAMEA10944593	2.2	48.5	Europe	Hap I
TRI 6895	SAMEA10944696	2.2	48.5	Europe	Hap I
TRI 6897	SAMEA10944697	2.2	48.5	Europe	Hap I
TRI 6899	SAMEA10944608	2.2	48.5	Europe	Hap I
TRI 6840	SAMEA10944603	2.2	48.5	Europe	Hap I
TRI 6867	SAMEA10944604	2.2	48.5	Europe	Hap I
TRI 6868	SAMEA10944605	2.2	48.5	Europe	Hap I
TRI 6870	SAMEA10944606	2.2	48.5	Europe	Hap I
TRI 6874	SAMEA10944607	2.2	48.5	Europe	Hap I
TRI 6726	SAMEA10944598	2.2	48.5	Europe	Hap I
TRI 7884	SAMEA10944626	2.2	48.5	Europe	Hap I
TRI 7888	SAMEA10944627	2.2	48.5	Europe	Hap I
TRI 7893	SAMEA10944628	2.2	48.5	Europe	Hap I
TRI 9433	SAMEA10944640	2.2	48.5	Europe	Hap I
BUENNO	SAMEA10944318	2.83376	50.0152	Europe	Hap I
TRI 7719	SAMEA10944728	5.46456	50.9792	Europe	Hap I
Eurojet	SAMEA10944435	16.3173	49.3667	Europe	Hap I
Bombus	SAMEA10944419	1.14179	48.2045	Europe	Hap I
Johnny	SAMEA10944459	3.84599	47.7063	Europe	Hap I
FRA-C1	SRR7164604	2.42458	48.8511	Europe	Hap I
Partner	SAMEA10944511	2.60237	50.2825	Europe	Hap I
Boregar	SAMEA10944316	1.15589	49.9188	Europe	Hap I
Arezzo	SAMEA10944313	1.96841	47.4849	Europe	Hap I
TRI 7818	SAMEA10944729	3.96456	51.6099	Europe	Hap I
Instinct	SAMEA10944455	3.6139	48.6076	Europe	Hap I
TRI 9978	SAMEA10944655	4.48694	51.4923	Europe	Hap II
Neuzucht	SRR10766582	9.33333	49.4167	Europe	Hap I
Expert	SAMEA10944436	1.6279	49.3224	Europe	Hap I
Balaton	SAMEA10944412	16.7067	48.8708	Europe	Hap I
TRI 197	SAMEA10944677	25.37	49.5	Europe	Hap I
Boss	SAMEA10944421	2.15262	50.4185	Europe	Hap I
Baguette11	SAMEA10944411	3.78317	47.9664	Europe	Hap I
Oxal	SAMEA10944508	1.73905	48.4661	Europe	Hap I
23995	S130	40	50	Europe	Hap I
gaojiasuo	S236	40	50	Europe	Hap I
aodesa3	S237	40	50	Europe	Hap I
TRI 11213	SAMEA10944397	14.22	50.05	Europe	Hap II
TRI 13302	SAMEA10944068	14.22	50.05	Europe	Hap II
Banquet	SAMEA10944315	14.22	50.05	Europe	Hap I
TRI 11195	SAMEA10944085	14.22	50.05	Europe	Hap I
TRI 11996	SAMEA10944143	14.22	50.05	Europe	Hap I
TRI 12026	SAMEA10944113	14.22	50.05	Europe	Hap I
TRI 13205	SAMEA10944394	14.22	50.05	Europe	Hap I
TRI 13312	SAMEA10944122	14.22	50.05	Europe	Hap I
TRI 8038	SAMEA10944022	14.22	50.05	Europe	Hap I
TRI 4987	SAMEA10944583	14.22	50.05	Europe	Hap I
TRI 7716	SAMEA10944623	14.22	50.05	Europe	Hap I
Hyperion	SAMEA10944453	-0.665057	51.9913	Europe	Hap I
Intense	SAMEA10944457	2.40802	50.9243	Europe	Hap I
Einstein	SAMEA10944432	0.588169	50.9789	Europe	Hap I
KWSGymnast	SAMEA10944470	0.953358	52.8642	Europe	Hap I
Barok	SAMEA10944414	2.56995	47.0773	Europe	Hap I
Humber	SAMEA10944452	-0.0505177	50.72	Europe	Hap I
TRI 7384	SAMEA10944095	26.37	50.5	Europe	Hap I
TRI 7821	SAMEA10944730	4.21	50.51	Europe	Hap I
TRI 7838	SAMEA10944624	4.21	50.51	Europe	Hap I
TRI 8455	SAMEA10944634	4.21	50.51	Europe	Hap I
Monty	SAMEA10944495	-0.96154	50.7279	Europe	Hap I
TRI 370	SAMEA10944540	4.97713	51.9615	Europe	Hap I
Kobiera	SAMEA10944464	20.9222	52.8553	Europe	Hap I
Markiza	SAMEA10944490	22.3803	53.8633	Europe	Hap I
C42	S7	10.4515	51.1657	Europe	Hap II
Hubel	S9	10.4515	51.1657	Europe	Hap II
3418	S8	10.4515	51.1657	Europe	Hap II
Bauländer Spelz	S115	10.4515	51.1657	Europe	Hap II
Holstenkorn	S117	10.4515	51.1657	Europe	Hap II
Kippenhauser	S118	10.4515	51.1657	Europe	Hap II
Lignee	S119	10.4515	51.1657	Europe	Hap II
Ostro	S120	10.4515	51.1657	Europe	Hap II
Zuzger	S121	10.4515	51.1657	Europe	Hap II
Emilius	S116	10.4515	51.1657	Europe	Hap I
REKTOR	S233	10.4515	51.1657	Europe	Hap I
TRI 10170	SAMEA10943962	5.78959	48.6603	Europe	Hap I
KWSMilaneco	SAMEA10944473	13.7014	53.4274	Europe	Hap I
Musketeer	SAMEA10944498	-0.05	51.36	Europe	Hap I
Panorama	SAMEA10944510	-0.05	51.36	Europe	Hap I
Smuggler	SAMEA10944535	-0.05	51.36	Europe	Hap I
Travix	SAMEA10944244	-0.05	51.36	Europe	Hap I
Velocity	SAMEA10944248	-0.05	51.36	Europe	Hap I
Welford	SAMEA10944250	-0.05	51.36	Europe	Hap I
Xi19	SAMEA10944253	-0.05	51.36	Europe	Hap I
Consort	SAMEA10944428	-0.05	51.36	Europe	Hap I
Hereward	SAMEA10944451	-0.05	51.36	Europe	Hap I
Lynx	SAMEA10944486	-0.05	51.36	Europe	Hap I
Macro	SAMEA10944487	-0.05	51.36	Europe	Hap I
Malacca	SAMEA10944329	-0.05	51.36	Europe	Hap I
Savannah	SAMEA10944528	-0.05	51.36	Europe	Hap I
Symbol	SAMEA10944237	-0.05	51.36	Europe	Hap I
TRI 10049	SAMEA10944656	-0.05	51.36	Europe	Hap I
TRI 10179	SAMEA10944659	-0.05	51.36	Europe	Hap I
TRI 1401	SAMEA10944552	-0.05	51.36	Europe	Hap I
TRI 1024	SAMEA10944543	-0.05	51.36	Europe	Hap I
TRI 4740	SAMEA10944680	-0.05	51.36	Europe	Hap I
TRI 4893	SAMEA10944579	-0.05	51.36	Europe	Hap I
TRI 9323	SAMEA10944635	-0.05	51.36	Europe	Hap I
TRI 9679	SAMEA10944709	-0.05	51.36	Europe	Hap I
TRI 10898	SAMEA10944096	-0.05	51.36	Europe	Hap II
TRI 10924	SAMEA10944004	-0.05	51.36	Europe	Hap II
TRI 11131	SAMEA10944342	-0.05	51.36	Europe	Hap II
Kranich	SAMEA10944467	12.9287	52.1189	Europe	Hap I
Florian	SAMEA10944441	13.0032	53.8788	Europe	Hap I
TRI 5468	SAMEA10944594	5.26494	49.9514	Europe	Hap I
TRI 8134	SAMEA10944633	27.37	51.5	Europe	Hap I
KWSMagic	SAMEA10944472	13.0851	52.8484	Europe	Hap I
Bosporus	SAMEA10944420	13.3367	51.463	Europe	Hap I
TRI 3701	SAMEA10944671	4.90881	51.5171	Europe	Hap I
Famulus	SAMEA10944437	14.0383	52.3453	Europe	Hap I
TRI 10169	SAMEA10944658	4.61128	50.0106	Europe	Hap II
Bruce	SAMEA10944422	14.2383	53.489	Europe	Hap I
Gladiator	SAMEA10944446	0.380687	51.6261	Europe	Hap I
KWSMaddox	SAMEA10944327	12.2742	52.9125	Europe	Hap I
TRI 7873	SAMEA10944383	3.08555	48.2574	Europe	Hap I
Chiron	SAMEA10944320	14.636	52.0636	Europe	Hap I
Batuta	SAMEA10944415	21.8389	52.1819	Europe	Hap I
Apostel	SAMEA10944312	13.9893	51.2926	Europe	Hap I
Attraktion	SAMEA10944410	14.6822	52.816	Europe	Hap I
Kingdom	SAMEA10944463	-0.146952	52.1945	Europe	Hap I
NLD-C1	SRR7164628	5.94767	52.0277	Europe	Hap I
Glasgow	SAMEA10944323	0.160208	52.8853	Europe	Hap I
Alceste	SAMEA10944309	13.894	51.5044	Europe	Hap I
Rubens	SAMEA10944522	21	52.13	Europe	Hap I
Rywalka	SAMEA10944525	21	52.13	Europe	Hap I
Satyna	SAMEA10944527	21	52.13	Europe	Hap I
Smuga	SAMEA10944534	21	52.13	Europe	Hap I
Tonacja	SAMEA10944239	21	52.13	Europe	Hap I
Korweta	SAMEA10944466	21	52.13	Europe	Hap I
Mewa	SAMEA10944333	21	52.13	Europe	Hap I
TRI 12818	SAMEA10943955	21	52.13	Europe	Hap I
TRI 21181	SAMEA10944134	21	52.13	Europe	Hap I
TRI 21197	SAMEA10944013	21	52.13	Europe	Hap I
TRI 24254	SAMEA10943986	21	52.13	Europe	Hap I
TRI 160	SAMEA10944034	21	52.13	Europe	Hap I
TRI 8014	SAMEA10944071	21	52.13	Europe	Hap I
TRI 159	SAMEA10944719	21	52.13	Europe	Hap I
TRI 4651	SAMEA10944674	21	52.13	Europe	Hap I
TRI 4659	SAMEA10944675	21	52.13	Europe	Hap I
TRI 4801	SAMEA10944575	21	52.13	Europe	Hap I
TRI 5080	SAMEA10944688	21	52.13	Europe	Hap I
TRI 5096	SAMEA10944689	21	52.13	Europe	Hap I
TRI 6830	SAMEA10944725	21	52.13	Europe	Hap I
TRI 9604	SAMEA10944645	21	52.13	Europe	Hap I
Edward	SAMEA10944431	12.1649	51.2097	Europe	Hap I
Wilhelmina	SRR10766507	5.2913	52.1326	Europe	Hap I
Elixer	SAMEA10944433	14.2757	53.4795	Europe	Hap I
Jantarka	SAMEA10944325	22.0241	51.5879	Europe	Hap I
Sophytra	SAMEA10944228	4.54	52.23	Europe	Hap I
Semper	SAMEA10944530	4.54	52.23	Europe	Hap I
Tower	SAMEA10944243	4.54	52.23	Europe	Hap I
TRI 11952	SAMEA10944088	4.54	52.23	Europe	Hap I
Trintella	SAMEA10944245	4.54	52.23	Europe	Hap I
TRI 1111	SAMEA10944003	4.54	52.23	Europe	Hap I
TRI 5042	SAMEA10944051	4.54	52.23	Europe	Hap I
TRI 5247	SAMEA10943968	4.54	52.23	Europe	Hap I
TRI 4959	SAMEA10944580	4.54	52.23	Europe	Hap I
TRI 8280	SAMEA10944705	4.54	52.23	Europe	Hap I
Akteur	SAMEA10944402	14.3604	53.024	Europe	Hap I
KWSOzon	SAMEA10944475	13.25	52.3	Europe	Hap I
KWSPius	SAMEA10944476	13.25	52.3	Europe	Hap I
KWSSalix	SAMEA10944477	13.25	52.3	Europe	Hap I
KWSScirocco	SAMEA10944328	13.25	52.3	Europe	Hap I
Lahertis	SAMEA10944478	13.25	52.3	Europe	Hap I
Lars	SAMEA10944479	13.25	52.3	Europe	Hap I
Lear	SAMEA10944480	13.25	52.3	Europe	Hap I
LGImposanto	SAMEA10944482	13.25	52.3	Europe	Hap I
LGKopernikus	SAMEA10944483	13.25	52.3	Europe	Hap I
LGMagirus	SAMEA10944484	13.25	52.3	Europe	Hap I
Magister	SAMEA10944488	13.25	52.3	Europe	Hap I
Manager	SAMEA10944489	13.25	52.3	Europe	Hap I
Marin	SAMEA10944330	13.25	52.3	Europe	Hap I
Matrix	SAMEA10944491	13.25	52.3	Europe	Hap I
Mescal	SAMEA10944332	13.25	52.3	Europe	Hap I
Midas	SAMEA10944493	13.25	52.3	Europe	Hap I
Mulan	SAMEA10944496	13.25	52.3	Europe	Hap I
Muskat	SAMEA10944497	13.25	52.3	Europe	Hap I
Nelson	SAMEA10944503	13.25	52.3	Europe	Hap I
Nordkap	SAMEA10944504	13.25	52.3	Europe	Hap I
Norin	SAMEA10944505	13.25	52.3	Europe	Hap I
Ohio	SAMEA10944506	13.25	52.3	Europe	Hap I
Patras	SAMEA10944512	13.25	52.3	Europe	Hap I
PF001	SAMEA10944144	13.25	52.3	Europe	Hap I
PF002	SAMEA10944145	13.25	52.3	Europe	Hap I
PF003	SAMEA10944146	13.25	52.3	Europe	Hap I
PF004	SAMEA10944147	13.25	52.3	Europe	Hap I
PF005	SAMEA10944148	13.25	52.3	Europe	Hap I
PF006	SAMEA10944149	13.25	52.3	Europe	Hap I
PF007	SAMEA10944150	13.25	52.3	Europe	Hap I
PF008	SAMEA10944151	13.25	52.3	Europe	Hap I
PF009	SAMEA10944152	13.25	52.3	Europe	Hap I
PF010	SAMEA10944153	13.25	52.3	Europe	Hap I
PF011	SAMEA10944154	13.25	52.3	Europe	Hap I
PF012	SAMEA10944155	13.25	52.3	Europe	Hap I
PF013	SAMEA10944156	13.25	52.3	Europe	Hap I
PF014	SAMEA10944157	13.25	52.3	Europe	Hap I
PF016	SAMEA10944159	13.25	52.3	Europe	Hap I
PF017	SAMEA10944160	13.25	52.3	Europe	Hap I
PF018	SAMEA10944161	13.25	52.3	Europe	Hap I
PF019	SAMEA10944162	13.25	52.3	Europe	Hap I
PF020	SAMEA10944163	13.25	52.3	Europe	Hap I
PF021	SAMEA10944164	13.25	52.3	Europe	Hap I
PF022	SAMEA10944165	13.25	52.3	Europe	Hap I
PF023	SAMEA10944166	13.25	52.3	Europe	Hap I
PF024	SAMEA10944167	13.25	52.3	Europe	Hap I
PF025	SAMEA10944168	13.25	52.3	Europe	Hap I
PF026	SAMEA10944169	13.25	52.3	Europe	Hap I
PF027	SAMEA10944170	13.25	52.3	Europe	Hap I
PF028	SAMEA10944171	13.25	52.3	Europe	Hap I
PF029	SAMEA10944172	13.25	52.3	Europe	Hap I
PF030	SAMEA10944173	13.25	52.3	Europe	Hap I
PF031	SAMEA10944174	13.25	52.3	Europe	Hap I
PF032	SAMEA10944175	13.25	52.3	Europe	Hap I
PF033	SAMEA10944176	13.25	52.3	Europe	Hap I
PF034	SAMEA10944177	13.25	52.3	Europe	Hap I
PF035	SAMEA10944178	13.25	52.3	Europe	Hap I
PF036	SAMEA10944179	13.25	52.3	Europe	Hap I
PF037	SAMEA10944180	13.25	52.3	Europe	Hap I
PF039	SAMEA10944182	13.25	52.3	Europe	Hap I
PF040	SAMEA10944183	13.25	52.3	Europe	Hap I
PF041	SAMEA10944184	13.25	52.3	Europe	Hap I
PF042	SAMEA10944185	13.25	52.3	Europe	Hap I
PF043	SAMEA10944186	13.25	52.3	Europe	Hap I
PF044	SAMEA10944187	13.25	52.3	Europe	Hap I
PF045	SAMEA10944188	13.25	52.3	Europe	Hap I
PF046	SAMEA10944189	13.25	52.3	Europe	Hap I
PF047	SAMEA10944190	13.25	52.3	Europe	Hap I
PF048	SAMEA10944191	13.25	52.3	Europe	Hap I
PF049	SAMEA10944192	13.25	52.3	Europe	Hap I
PF050	SAMEA10944193	13.25	52.3	Europe	Hap I
PF051	SAMEA10944194	13.25	52.3	Europe	Hap I
PF052	SAMEA10944195	13.25	52.3	Europe	Hap I
PF053	SAMEA10944196	13.25	52.3	Europe	Hap I
PF054	SAMEA10944197	13.25	52.3	Europe	Hap I
PF055	SAMEA10944198	13.25	52.3	Europe	Hap I
PF056	SAMEA10944199	13.25	52.3	Europe	Hap I
PF057	SAMEA10944200	13.25	52.3	Europe	Hap I
PF058	SAMEA10944201	13.25	52.3	Europe	Hap I
PF059	SAMEA10944202	13.25	52.3	Europe	Hap I
PF060	SAMEA10944203	13.25	52.3	Europe	Hap I
PF061	SAMEA10944204	13.25	52.3	Europe	Hap I
PF062	SAMEA10944205	13.25	52.3	Europe	Hap I
PF063	SAMEA10944206	13.25	52.3	Europe	Hap I
PF064	SAMEA10944207	13.25	52.3	Europe	Hap I
PF065	SAMEA10944208	13.25	52.3	Europe	Hap I
PF066	SAMEA10944209	13.25	52.3	Europe	Hap I
PF067	SAMEA10944210	13.25	52.3	Europe	Hap I
PF068	SAMEA10944211	13.25	52.3	Europe	Hap I
PF069	SAMEA10944212	13.25	52.3	Europe	Hap I
PF070	SAMEA10944213	13.25	52.3	Europe	Hap I
PF071	SAMEA10944214	13.25	52.3	Europe	Hap I
PF072	SAMEA10944215	13.25	52.3	Europe	Hap I
PF073	SAMEA10944216	13.25	52.3	Europe	Hap I
PF074	SAMEA10944217	13.25	52.3	Europe	Hap I
PF075	SAMEA10944218	13.25	52.3	Europe	Hap I
PF076	SAMEA10944219	13.25	52.3	Europe	Hap I
PF077	SAMEA10944220	13.25	52.3	Europe	Hap I
PF078	SAMEA10944221	13.25	52.3	Europe	Hap I
PF079	SAMEA10944222	13.25	52.3	Europe	Hap I
PF080	SAMEA10944223	13.25	52.3	Europe	Hap I
PF081	SAMEA10944224	13.25	52.3	Europe	Hap I
PF082	SAMEA10944225	13.25	52.3	Europe	Hap I
PF083	SAMEA10944255	13.25	52.3	Europe	Hap I
PF084	SAMEA10944256	13.25	52.3	Europe	Hap I
PF085	SAMEA10944257	13.25	52.3	Europe	Hap I
PF087	SAMEA10944259	13.25	52.3	Europe	Hap I
PF088	SAMEA10944260	13.25	52.3	Europe	Hap I
PF089	SAMEA10944261	13.25	52.3	Europe	Hap I
PF090	SAMEA10944262	13.25	52.3	Europe	Hap I
PF091	SAMEA10944263	13.25	52.3	Europe	Hap I
PF093	SAMEA10944265	13.25	52.3	Europe	Hap I
PF094	SAMEA10944266	13.25	52.3	Europe	Hap I
PF097	SAMEA10944269	13.25	52.3	Europe	Hap I
PF098	SAMEA10944270	13.25	52.3	Europe	Hap I
PF099	SAMEA10944271	13.25	52.3	Europe	Hap I
PF100	SAMEA10944272	13.25	52.3	Europe	Hap I
PF101	SAMEA10944273	13.25	52.3	Europe	Hap I
PF102	SAMEA10944274	13.25	52.3	Europe	Hap I
PF103	SAMEA10944275	13.25	52.3	Europe	Hap I
PF104	SAMEA10944276	13.25	52.3	Europe	Hap I
PF105	SAMEA10944277	13.25	52.3	Europe	Hap I
PF106	SAMEA10944278	13.25	52.3	Europe	Hap I
PF107	SAMEA10944279	13.25	52.3	Europe	Hap I
PF108	SAMEA10944280	13.25	52.3	Europe	Hap I
PF109	SAMEA10944281	13.25	52.3	Europe	Hap I
PF110	SAMEA10944282	13.25	52.3	Europe	Hap I
PF111	SAMEA10944283	13.25	52.3	Europe	Hap I
PF112	SAMEA10944284	13.25	52.3	Europe	Hap I
PF113	SAMEA10944285	13.25	52.3	Europe	Hap I
PF114	SAMEA10944286	13.25	52.3	Europe	Hap I
PF115	SAMEA10944287	13.25	52.3	Europe	Hap I
PF116	SAMEA10944288	13.25	52.3	Europe	Hap I
PF117	SAMEA10944289	13.25	52.3	Europe	Hap I
PF118	SAMEA10944290	13.25	52.3	Europe	Hap I
PF119	SAMEA10944291	13.25	52.3	Europe	Hap I
PF120	SAMEA10944292	13.25	52.3	Europe	Hap I
Pionier	SAMEA10944513	13.25	52.3	Europe	Hap I
PM001	SAMEA10944293	13.25	52.3	Europe	Hap I
PM002	SAMEA10944294	13.25	52.3	Europe	Hap I
PM003	SAMEA10944295	13.25	52.3	Europe	Hap I
PM004	SAMEA10944296	13.25	52.3	Europe	Hap I
PM005	SAMEA10944297	13.25	52.3	Europe	Hap I
PM006	SAMEA10944298	13.25	52.3	Europe	Hap I
PM007	SAMEA10944299	13.25	52.3	Europe	Hap I
PM008	SAMEA10944300	13.25	52.3	Europe	Hap I
PM009	SAMEA10944301	13.25	52.3	Europe	Hap I
PM010	SAMEA10944302	13.25	52.3	Europe	Hap I
PM011	SAMEA10944303	13.25	52.3	Europe	Hap I
PM012	SAMEA10944304	13.25	52.3	Europe	Hap I
PM013	SAMEA10944305	13.25	52.3	Europe	Hap I
PM014	SAMEA10944306	13.25	52.3	Europe	Hap I
PM015	SAMEA10944307	13.25	52.3	Europe	Hap I
Ponticus	SAMEA10944514	13.25	52.3	Europe	Hap I
Position	SAMEA10944515	13.25	52.3	Europe	Hap I
Primus	SAMEA10944516	13.25	52.3	Europe	Hap I
RibbeckPZO	SAMEA10944520	13.25	52.3	Europe	Hap I
Rubisko	SAMEA10944523	13.25	52.3	Europe	Hap I
Rumor	SAMEA10944524	13.25	52.3	Europe	Hap I
Schamane	SAMEA10944529	13.25	52.3	Europe	Hap I
Sheriff	SAMEA10944531	13.25	52.3	Europe	Hap I
Smaragd	SAMEA10944533	13.25	52.3	Europe	Hap I
Sobi	SAMEA10944536	13.25	52.3	Europe	Hap I
Sokrates	SAMEA10944538	13.25	52.3	Europe	Hap I
SWTataros	SAMEA10944235	13.25	52.3	Europe	Hap I
SWTopper	SAMEA10944236	13.25	52.3	Europe	Hap I
Tarkus	SAMEA10944238	13.25	52.3	Europe	Hap I
Torrild	SAMEA10944242	13.25	52.3	Europe	Hap I
TRI 29481	SAMEA10943965	13.25	52.3	Europe	Hap I
Tuareg	SAMEA10944246	13.25	52.3	Europe	Hap I
Tukan	SAMEA10944247	13.25	52.3	Europe	Hap I
Zappa	SAMEA10944400	13.25	52.3	Europe	Hap I
Zeppelin	SAMEA10944254	13.25	52.3	Europe	Hap I
Bussard	SAMEA10944423	13.25	52.3	Europe	Hap I
Caesar	SAMEA10944424	13.25	52.3	Europe	Hap I
Kanzler	SAMEA10944462	13.25	52.3	Europe	Hap I
Mikon	SAMEA10944494	13.25	52.3	Europe	Hap I
Sperber	SAMEA10944229	13.25	52.3	Europe	Hap I
Toronto	SAMEA10944241	13.25	52.3	Europe	Hap I
TRI 10177	SAMEA10944065	13.25	52.3	Europe	Hap I
TRI 11849	SAMEA10944341	13.25	52.3	Europe	Hap I
TRI 19339	SAMEA10944036	13.25	52.3	Europe	Hap I
TRI 21462	SAMEA10944027	13.25	52.3	Europe	Hap I
TRI 22633	SAMEA10944021	13.25	52.3	Europe	Hap I
TRI 22672	SAMEA10944035	13.25	52.3	Europe	Hap I
TRI 22993	SAMEA10944000	13.25	52.3	Europe	Hap I
TRI 24083	SAMEA10944070	13.25	52.3	Europe	Hap I
TRI 24515	SAMEA10943979	13.25	52.3	Europe	Hap I
TRI 9326	SAMEA10944015	13.25	52.3	Europe	Hap I
TRI 10373	SAMEA10944714	13.25	52.3	Europe	Hap I
TRI 1120	SAMEA10944074	13.25	52.3	Europe	Hap I
TRI 1183	SAMEA10944040	13.25	52.3	Europe	Hap I
TRI 1586	SAMEA10944052	13.25	52.3	Europe	Hap I
TRI 24598	SAMEA10943982	13.25	52.3	Europe	Hap I
TRI 313	SAMEA10944054	13.25	52.3	Europe	Hap I
TRI 4189	SAMEA10944072	13.25	52.3	Europe	Hap I
TRI 4858	SAMEA10943971	13.25	52.3	Europe	Hap I
TRI 4981	SAMEA10943957	13.25	52.3	Europe	Hap I
TRI 7040	SAMEA10944048	13.25	52.3	Europe	Hap I
TRI 7692	SAMEA10944031	13.25	52.3	Europe	Hap I
TRI 9555	SAMEA10944141	13.25	52.3	Europe	Hap I
TRI 285	SAMEA10944698	13.25	52.3	Europe	Hap I
TRI 1081	SAMEA10944544	13.25	52.3	Europe	Hap I
TRI 1139	SAMEA10944545	13.25	52.3	Europe	Hap I
TRI 1289	SAMEA10944549	13.25	52.3	Europe	Hap I
TRI 1340	SAMEA10944551	13.25	52.3	Europe	Hap I
TRI 3808	SAMEA10944559	13.25	52.3	Europe	Hap I
TRI 3810	SAMEA10944560	13.25	52.3	Europe	Hap I
TRI 4669	SAMEA10944676	13.25	52.3	Europe	Hap I
TRI 4671	SAMEA10944571	13.25	52.3	Europe	Hap I
TRI 4687	SAMEA10944678	13.25	52.3	Europe	Hap I
TRI 4751	SAMEA10944572	13.25	52.3	Europe	Hap I
TRI 4788	SAMEA10944681	13.25	52.3	Europe	Hap I
TRI 4798	SAMEA10944574	13.25	52.3	Europe	Hap I
TRI 4808	SAMEA10944683	13.25	52.3	Europe	Hap I
TRI 4815	SAMEA10944576	13.25	52.3	Europe	Hap I
TRI 7015	SAMEA10944611	13.25	52.3	Europe	Hap I
TRI 7048	SAMEA10944613	13.25	52.3	Europe	Hap I
TRI 7051	SAMEA10944614	13.25	52.3	Europe	Hap I
TRI 4970	SAMEA10944581	13.25	52.3	Europe	Hap I
TRI 4984	SAMEA10944582	13.25	52.3	Europe	Hap I
TRI 4997	SAMEA10944584	13.25	52.3	Europe	Hap I
TRI 5025	SAMEA10944685	13.25	52.3	Europe	Hap I
TRI 5054	SAMEA10944585	13.25	52.3	Europe	Hap I
TRI 5065	SAMEA10944586	13.25	52.3	Europe	Hap I
TRI 5075	SAMEA10944587	13.25	52.3	Europe	Hap I
TRI 5102	SAMEA10944690	13.25	52.3	Europe	Hap I
TRI 7606	SAMEA10944621	13.25	52.3	Europe	Hap I
TRI 7702	SAMEA10944622	13.25	52.3	Europe	Hap I
TRI 8441	SAMEA10944707	13.25	52.3	Europe	Hap I
Arktis	SAMEA10944409	13.1555	52.6028	Europe	Hap I
Gulliver	SAMEA10944324	-0.911005	50.4391	Europe	Hap I
Discus	SAMEA10944430	14.5304	53.2841	Europe	Hap I
KWSMontana	SAMEA10944474	12.28	52.2392	Europe	Hap I
Nadobna	SAMEA10944500	20.4908	51.8001	Europe	Hap I
Benchmark	SAMEA10944416	13.2788	53.9907	Europe	Hap I
TRI 8299	SAMEA10944706	28.37	52.5	Europe	Hap I
Faustus	SAMEA10944438	13.8555	51.7592	Europe	Hap I
Gustav	SAMEA10944449	12.3173	52.5353	Europe	Hap I
Anapolis	SAMEA10944311	12.4904	52.4707	Europe	Hap I
Alchemy	SAMEA10944403	0.835633	52.5954	Europe	Hap I
Banderola	SAMEA10944413	21.5476	52.5636	Europe	Hap I
Joker	SAMEA10944460	14.7193	52.9455	Europe	Hap I
Glaucus	SAMEA10944447	14.1576	52.8278	Europe	Hap I
Franz	SAMEA10944443	13.3994	53.6499	Europe	Hap I
KWSBarny	SAMEA10944326	12.353	51.866	Europe	Hap I
Colonia	SAMEA10944427	13.3903	51.5519	Europe	Hap I
Capone	SAMEA10944425	14.9171	51.0897	Europe	Hap I
Gatsby	SAMEA10944445	-0.372156	50.1802	Europe	Hap I
Nateja	SAMEA10944501	21.6669	51.9665	Europe	Hap I
Kometus	SAMEA10944465	12.1728	51.7547	Europe	Hap I
Bryza	SAMEA10944317	13.7789	53.4284	Europe	Hap I
OstkaStrzelecka	SAMEA10944507	22.1349	51.8252	Europe	Hap I
PF015	SAMEA10944158	13.0641	52.3802	Europe	Hap II
KWSChamsin	SAMEA10944468	14.0571	52.4103	Europe	Hap I
KWSLoft	SAMEA10944471	12.4072	53.1233	Europe	Hap I
Julius	SAMEA10944461	14.3358	51.8552	Europe	Hap I
Muza	SAMEA10944499	21.769	52.8958	Europe	Hap I
TRI 9460	SAMEA10944641	29.37	53.5	Europe	Hap II
Izyda	SAMEA10944458	21.0138	53.1767	Europe	Hap I
Figura	SAMEA10944439	21.7381	53.0861	Europe	Hap I
Finezja	SAMEA10944440	22.4563	51.8328	Europe	Hap I
Natula	SAMEA10944502	20.5326	52.9577	Europe	Hap I
Bogatka	SAMEA10944417	21.4366	51.9068	Europe	Hap I
Impression	SAMEA10944454	14.9939	51.1374	Europe	Hap I
Legenda	SAMEA10944481	22.6877	53.3839	Europe	Hap I
Estivus	SAMEA10944434	13.3834	52.2944	Europe	Hap I
Dichter	SAMEA10944429	12.2855	53.9285	Europe	Hap I
Ambition	SAMEA10944406	12.34	55.41	Europe	Hap I
Amundsen	SAMEA10944310	12.34	55.41	Europe	Hap I
Cassiopeia	SAMEA10944426	12.34	55.41	Europe	Hap I
Rockefeller	SAMEA10944521	12.34	55.41	Europe	Hap I
Torkil	SAMEA10944240	12.34	55.41	Europe	Hap I
Xantippe	SAMEA10944251	12.34	55.41	Europe	Hap I
Solist	SAMEA10944227	12.34	55.41	Europe	Hap I
TRI 4721	SAMEA10944679	12.34	55.41	Europe	Hap I
TRI 4793	SAMEA10944682	12.34	55.41	Europe	Hap I
SWHarnesk	SAMEA10944231	18.234	59.6126	Europe	Hap I
SWHurtig	SAMEA10944233	17.8658	58.8415	Europe	Hap I
Slejpner	SAMEA10944532	18.03	59.2	Europe	Hap I
Stava	SAMEA10944230	18.03	59.2	Europe	Hap I
TRI 16039	SAMEA10944024	18.03	59.2	Europe	Hap I
TRI 23848	SAMEA10944014	18.03	59.2	Europe	Hap I
TRI 24195	SAMEA10944120	18.03	59.2	Europe	Hap I
TRI 24301	SAMEA10944069	18.03	59.2	Europe	Hap I
TRI 109	SAMEA10944016	18.03	59.2	Europe	Hap I
TRI 330	SAMEA10944101	18.03	59.2	Europe	Hap I
TRI 63	SAMEA10943989	18.03	59.2	Europe	Hap I
TRI 95	SAMEA10943964	18.03	59.2	Europe	Hap I
TRI 4606	SAMEA10944673	18.03	59.2	Europe	Hap I
TRI 5108	SAMEA10944590	18.03	59.2	Europe	Hap I
TRI 23760	SAMEA10944083	25.03	60.15	Europe	Hap I
TRI 9927	SAMEA10944710	25.03	60.15	Europe	Hap I
TRI 123	SAMEA10944030	25.03	60.15	Europe	Hap I
Aperitiv	SAMEA10944408	19.0275	60.6982	Europe	Hap I
SWSkotte	SAMEA10944234	17.0309	59.899	Europe	Hap I
Inia 66	SAMEA10944347	-99.1	19.2	North America	Hap II
TAM 202	CRR289922	-98.5	31.39	North America	Hap I
TAM 400	CRR290265	-98.5	31.39	North America	Hap I
TAM 303	CRR289958	-98.5	31.39	North America	Hap I
Sturdy 2K	CRR290026	-98.5	31.39	North America	Hap I
TAM 112	CRR290045	-98.5	31.39	North America	Hap I
TAM 111	CRR290256	-98.5	31.39	North America	Hap I
Jagalene	CRR290095	-98.5	31.39	North America	Hap II
ok Bullet	CRR290088	-97.17	35.4	North America	Hap II
OK00421	CRR290002	-97.17	35.4	North America	Hap I
Ok101	CRR290036	-97.17	35.4	North America	Hap I
Endurance	CRR290166	-97.17	35.4	North America	Hap I
Okfield	CRR290212	-97.17	35.4	North America	Hap I
Intrada	CRR290222	-97.17	35.4	North America	Hap I
Stanton	CRR290051	-96.9892	38.0283	North America	Hap II
Laredo	CRR289936	-105.197	38.1845	North America	Hap I
Cutter	CRR290129	-98.133	37.2267	North America	Hap II
Ogallala	CRR290028	-104.387	39.4793	North America	Hap I
Halt	CRR289972	-104.336	37.6082	North America	Hap I
Betty	CRR289993	-97.2482	37.2879	North America	Hap II
Bond CL	CRR289937	-103.677	39.996	North America	Hap I
Santa Fe	CRR289966	-96.8683	38.4862	North America	Hap II
Arlin	CRR290252	-98.43	38.41	North America	Hap II
Neosho	CRR289975	-98.43	38.41	North America	Hap I
Burchett	CRR289988	-98.43	38.41	North America	Hap I
Kalvesta	CRR290010	-98.43	38.41	North America	Hap I
Heyne	CRR290022	-98.43	38.41	North America	Hap I
Trego	CRR290033	-98.43	38.41	North America	Hap I
Cossack	CRR290099	-98.43	38.41	North America	Hap I
Overley	CRR290149	-98.43	38.41	North America	Hap I
RonL	CRR290228	-98.43	38.41	North America	Hap I
Keota	CRR290234	-98.43	38.41	North America	Hap I
Thunderbolt	CRR290014	-104.065	39.3991	North America	Hap I
Fuller	CRR289924	-96.7665	39.0475	North America	Hap I
Oro Blanco	CRR290048	-105.53	38.93	North America	Hap I
Ponderosa	CRR290064	-105.53	38.93	North America	Hap I
Hatcher	CRR290070	-105.53	38.93	North America	Hap I
Above	CRR290081	-105.53	38.93	North America	Hap I
Longhorn	CRR290108	-105.53	38.93	North America	Hap I
Jules	CRR290109	-105.53	38.93	North America	Hap I
Yuma	CRR290118	-105.53	38.93	North America	Hap I
Cisco	CRR290188	-105.53	38.93	North America	Hap I
Prowers	CRR290205	-105.53	38.93	North America	Hap I
Hondo	CRR290220	-105.53	38.93	North America	Hap I
Ankor	CRR290246	-105.53	38.93	North America	Hap I
Platte	CRR289971	-97.393	39.4908	North America	Hap II
Ripper	CRR290001	-105.454	38.6718	North America	Hap I
TRI 27364	SAMEA10944372	-77.02	39.91	North America	Hap II
TRI 7963	SAMEA10944075	-77.02	39.91	North America	Hap II
TRI 4883	SAMEA10944578	-77.02	39.91	North America	Hap II
Arrowsmith	CRR289945	-99.6	41.58	North America	Hap I
Cougar	CRR289926	-99.6	41.58	North America	Hap I
Antelope	CRR289960	-99.6	41.58	North America	Hap I
Windstar	CRR289977	-99.6	41.58	North America	Hap I
Goodstreak	CRR289989	-99.6	41.58	North America	Hap I
Harry	CRR290071	-99.6	41.58	North America	Hap I
Alliance	CRR290094	-99.6	41.58	North America	Hap I
Wahoo	CRR290192	-99.6	41.58	North America	Hap I
Hallam	CRR290196	-99.6	41.58	North America	Hap I
Pronghorn	CRR290217	-99.6	41.58	North America	Hap I
Niobrara	CRR290263	-99.6	41.58	North America	Hap I
Tomahauk	CRR290054	-93.3	42.5	North America	Hap I
Harding	CRR290052	-100.27	44.33	North America	Hap I
Wendy	CRR290062	-100.27	44.33	North America	Hap I
SD97538	CRR290116	-100.27	44.33	North America	Hap I
Tandem	CRR290146	-100.27	44.33	North America	Hap I
Nekota	CRR290060	-99.6322	44.6149	North America	Hap I
Alice	CRR289985	-98.9878	45.1406	North America	Hap I
Crimson	CRR289939	-99.1861	45.6449	North America	Hap II
TRI 1251	SAMEA10944084	-75.42	45.27	North America	Hap I
WB411W	CRR289951	-111.2	45.7	North America	Hap II
Shavano	CRR290039	-111.2	45.7	North America	Hap I
CI 12203	SRR10766633	-120	47	North America	Hap I
Cook	SAMEA10944377	149.08	-35.15	Oceania	Hap II
TRI 21021	SAMEA10944058	149.08	-35.15	Oceania	Hap I
Quality	SRR10766509	133.775	-25.2744	Oceania	Hap I
OPTIMUS	S239	133.775	-25.2744	Oceania	Hap I
TRI 11465	SAMEA10944352	-60	-36.3	South America	Hap II
TRI 19343	SAMEA10944346	-60	-36.3	South America	Hap II
TRI 11460	SAMEA10944393	-60	-36.3	South America	Hap I
TRI 11469	SAMEA10944358	-60	-36.3	South America	Hap I
TRI 4840	SAMEA10944577	-60	-36.3	South America	Hap I
Tomahauk	CRR290054	-93.3	42.5	North America		Tomahauk
Cook	SAMEA10944377	149.08	-35.15	Oceania		Cook
TRI 21021	SAMEA10944058	149.08	-35.15	Oceania		TRI 21021
Quality	SRR10766509	133.775	-25.2744	Oceania		Quality
OPTIMUS	S239	133.775	-25.2744	Oceania		OPTIMUS
TRI 11465	SAMEA10944352	-60	-36.3	South America		TRI 11465
TRI 19343	SAMEA10944346	-60	-36.3	South America		TRI 19343
TRI 11460	SAMEA10944393	-60	-36.3	South America		TRI 11460
TRI 11469	SAMEA10944358	-60	-36.3	South America		TRI 11469
TRI 4840	SAMEA10944577	-60	-36.3	South America		TRI 4840

## Sheet: Supplementary Table 8
Supplementary Table 8. The haplotype information of 1032 wheat accessions.
Varieties	VCF-ID	Classification	Haplotype
shi4185	ZY-64	Cultivar	Hap II
nongda3338	ZY-67	Cultivar	Hap II
shiruan02-1	S142	Cultivar	Hap II
fengchan3hao	S214	Cultivar	Hap II
zhengmai9023	S217	Cultivar	Hap II
yanzhan1	S218	Cultivar	Hap II
nanda2419	S219	Cultivar	Hap II
taishan1	S220	Cultivar	Hap II
zhengyin4	S223	Cultivar	Hap II
rikeze54	S229	Cultivar	Hap II
rikeze8	S230	Cultivar	Hap II
nongda3331	s3331	Cultivar	Hap II
Crimson	CRR289939	Cultivar	Hap II
WB411W	CRR289951	Cultivar	Hap II
Santa Fe	CRR289966	Cultivar	Hap II
Betty	CRR289993	Cultivar	Hap II
Stanton	CRR290051	Cultivar	Hap II
ok Bullet	CRR290088	Cultivar	Hap II
Jagalene	CRR290095	Cultivar	Hap II
Cutter	CRR290129	Cultivar	Hap II
86PK1287-001.14	CRR290207	Cultivar	Hap II
Arlin	CRR290252	Cultivar	Hap II
Neixiang 5	SRR10766554	Cultivar	Hap II
Xuzhou 14	SRR10766521	Cultivar	Hap II
St 1472/506	SRR10766510	Cultivar	Hap II
Fengchan 3	SRR10766499	Cultivar	Hap II
Taishan 1	SRR10766631	Cultivar	Hap II
Xian 8	SRR10766580	Cultivar	Hap II
Yumai 17	SRR10766579	Cultivar	Hap II
Mianyang 15	SRR10766577	Cultivar	Hap II
Xinkehan 9	CRR062069	Cultivar	Hap II
Shaannong 7859	SRR10766570	Cultivar	Hap II
Jinan 13	SRR10766567	Cultivar	Hap II
Jimai 26	SRR10766566	Cultivar	Hap II
Jinan 16	CRR062079	Cultivar	Hap II
Wenmai 6	SRR10766557	Cultivar	Hap II
Ningchun 4	SRR10766556	Cultivar	Hap II
Yumai 41	SRR10766552	Cultivar	Hap II
Mianyang 26	SRR10766551	Cultivar	Hap II
Gaoyou 503	SRR10766549	Cultivar	Hap II
Jimai 38	SRR10766548	Cultivar	Hap II
Zhoumai 18	CRR062095	Cultivar	Hap II
Shi 4185	CRR062097	Cultivar	Hap II
Zhengmai 9023	CRR062098	Cultivar	Hap II
Hengguan 35	CRR062100	Cultivar	Hap II
Bainong AK 58	CRR062102	Cultivar	Hap II
Xinong 979	CRR062104	Cultivar	Hap II
Mentana	CRR062109	Cultivar	Hap II
Early Premium	SRR10766527	Cultivar	Hap II
Abbondanza	SRR10766518	Cultivar	Hap II
St 2422/464	SRR10766517	Cultivar	Hap II
Xiaoyan 6	SRR10766513	Cultivar	Hap II
Aimengniu	SRR10766512	Cultivar	Hap II
Zhou 8425B	SRR10766511	Cultivar	Hap II
Rieti	SRR10766508	Cultivar	Hap II
Gaocheng 8901	SRR10766498	Cultivar	Hap II
Shiluan 02-1	SRR10766497	Cultivar	Hap II
Zhongyou 9507	SRR10766494	Cultivar	Hap II
Xinmai 26	SRR10766489	Cultivar	Hap II
Bainong 201	SRR10766630	Cultivar	Hap II
Yanzhan 4110	SRR10766626	Cultivar	Hap II
Shijiazhuang 8	SRR10766623	Cultivar	Hap II
Mara	SRR10766603	Cultivar	Hap II
Yuejin 5	CRR062172	Cultivar	Hap II
Yumai 47	SRR10766599	Cultivar	Hap II
Shaan 213	SRR10766595	Cultivar	Hap II
PH 82-2-2	SRR10766593	Cultivar	Hap II
Xinong 881	SRR10766592	Cultivar	Hap II
Xiaoyan 96	SRR10766590	Cultivar	Hap II
Aifeng 3	SRR10766588	Cultivar	Hap II
Bainong 791	SRR10766586	Cultivar	Hap II
Fontarronco	SRR10766584	Cultivar	Hap II
Mengxian 201	SRR10766583	Cultivar	Hap II
CAN-C1	SRR7256745	Cultivar	Hap II
FMSY	SRR7164585	Cultivar	Hap II
JCYLYL	SRR7164679	Cultivar	Hap II
XYLH	SRR7164651	Cultivar	Hap II
GYWLL	SRR7164642	Cultivar	Hap II
AMN	SRR7164650	Cultivar	Hap II
NXWH	SRR7164638	Cultivar	Hap II
KXSH	SRR7164635	Cultivar	Hap II
HNSH	SRR7164587	Cultivar	Hap II
ZYJWLQ	SRR7164689	Cultivar	Hap II
YASY	SRR7280761	Cultivar	Hap II
Wanyuanxuan9	CRR289938	Cultivar	Hap II
Xinmai9817	CRR289942	Cultivar	Hap II
Xiaoyan92	CRR289944	Cultivar	Hap II
Xinmai18	CRR289959	Cultivar	Hap II
Shi5033	CRR289979	Cultivar	Hap II
Yumai62	CRR290000	Cultivar	Hap II
Jiaomai668	CRR290012	Cultivar	Hap II
Wanmai19	CRR290015	Cultivar	Hap II
Nongda135	CRR290021	Cultivar	Hap II
Zhengyumai9987	CRR290032	Cultivar	Hap II
Wenmai8	CRR290038	Cultivar	Hap II
Z39-Dalilengjiao	CRR290041	Cultivar	Hap II
Luohan8	CRR290065	Cultivar	Hap II
Shan229	CRR290066	Cultivar	Hap II
Jinnong207	CRR290076	Cultivar	Hap II
Aizao8	CRR290079	Cultivar	Hap II
Xiaoyan55	CRR290093	Cultivar	Hap II
Changhe24	CRR290100	Cultivar	Hap II
Lankao86	CRR290101	Cultivar	Hap II
Wanyuanbai1	CRR290127	Cultivar	Hap II
Shan253	CRR290133	Cultivar	Hap II
09J40	CRR290134	Cultivar	Hap II
Xinong2611	CRR290141	Cultivar	Hap II
Qinmai11	CRR290156	Cultivar	Hap II
Xiaoyan926	CRR290172	Cultivar	Hap II
Luomai21	CRR290182	Cultivar	Hap II
Yuanfeng175	CRR290183	Cultivar	Hap II
Nongda1193	CRR290193	Cultivar	Hap II
Zhengmai9405	CRR290194	Cultivar	Hap II
Shan150	CRR290199	Cultivar	Hap II
NC08-2	CRR290211	Cultivar	Hap II
Zhengmai0856	CRR290218	Cultivar	Hap II
Yunong416	CRR290221	Cultivar	Hap II
Xiaoyan39	CRR290242	Cultivar	Hap II
Dali1	CRR290248	Cultivar	Hap II
PF015	SAMEA10944158	Cultivar	Hap II
zhoumai18	S135	Cultivar	Hap I
yannong15	S136	Cultivar	Hap I
lumai21	S137	Cultivar	Hap I
yumai18	S139	Cultivar	Hap I
nongda5181	S140	Cultivar	Hap I
changzhi6406	S209	Cultivar	Hap I
sumai3	S210	Cultivar	Hap I
enmai4	S211	Cultivar	Hap I
luofulin10	S212	Cultivar	Hap I
bima4	S213	Cultivar	Hap I
jinan17	S215	Cultivar	Hap I
fan6	S216	Cultivar	Hap I
yumai21	S221	Cultivar	Hap I
bainong3217	S224	Cultivar	Hap I
beijing8	S225	Cultivar	Hap I
shijiazhuang54	S227	Cultivar	Hap I
zangdong4	S228	Cultivar	Hap I
nonglin10	S238	Cultivar	Hap I
OPTIMUS	S239	Cultivar	Hap I
jinmai47	DJ1	Cultivar	Hap I
lunxuan987	LX987	Cultivar	Hap I
jimai22	C4-2	Cultivar	Hap I
jing411	C5-1	Cultivar	Hap I
s274	s3097-1	Cultivar	Hap I
jingdong6	s6554	Cultivar	Hap I
TAM 202	CRR289922	Cultivar	Hap I
Fuller	CRR289924	Cultivar	Hap I
Cougar	CRR289926	Cultivar	Hap I
Laredo	CRR289936	Cultivar	Hap I
Bond CL	CRR289937	Cultivar	Hap I
Arrowsmith	CRR289945	Cultivar	Hap I
TAM 303	CRR289958	Cultivar	Hap I
Antelope	CRR289960	Cultivar	Hap I
Halt	CRR289972	Cultivar	Hap I
Neosho	CRR289975	Cultivar	Hap I
Windstar	CRR289977	Cultivar	Hap I
Alice	CRR289985	Cultivar	Hap I
Burchett	CRR289988	Cultivar	Hap I
Goodstreak	CRR289989	Cultivar	Hap I
84TK101-036.1	CRR289991	Cultivar	Hap I
Rowdy	CRR289998	Cultivar	Hap I
Ripper	CRR290001	Cultivar	Hap I
Kalvesta	CRR290010	Cultivar	Hap I
Thunderbolt	CRR290014	Cultivar	Hap I
Heyne	CRR290022	Cultivar	Hap I
Sturdy 2K	CRR290026	Cultivar	Hap I
Ogallala	CRR290028	Cultivar	Hap I
Trego	CRR290033	Cultivar	Hap I
Ok101	CRR290036	Cultivar	Hap I
Shavano	CRR290039	Cultivar	Hap I
TAM 112	CRR290045	Cultivar	Hap I
Oro Blanco	CRR290048	Cultivar	Hap I
Harding	CRR290052	Cultivar	Hap I
Tomahauk	CRR290054	Cultivar	Hap I
Nekota	CRR290060	Cultivar	Hap I
Wendy	CRR290062	Cultivar	Hap I
Ponderosa	CRR290064	Cultivar	Hap I
Hatcher	CRR290070	Cultivar	Hap I
Harry	CRR290071	Cultivar	Hap I
Above	CRR290081	Cultivar	Hap I
Alliance	CRR290094	Cultivar	Hap I
Longhorn	CRR290108	Cultivar	Hap I
Jules	CRR290109	Cultivar	Hap I
SD97538	CRR290116	Cultivar	Hap I
Yuma	CRR290118	Cultivar	Hap I
Tandem	CRR290146	Cultivar	Hap I
Overley	CRR290149	Cultivar	Hap I
IWA8608766	CRR290154	Cultivar	Hap I
Endurance	CRR290166	Cultivar	Hap I
Cisco	CRR290188	Cultivar	Hap I
Wahoo	CRR290192	Cultivar	Hap I
Hallam	CRR290196	Cultivar	Hap I
Prowers	CRR290205	Cultivar	Hap I
Okfield	CRR290212	Cultivar	Hap I
Pronghorn	CRR290217	Cultivar	Hap I
Hondo	CRR290220	Cultivar	Hap I
Intrada	CRR290222	Cultivar	Hap I
RonL	CRR290228	Cultivar	Hap I
Keota	CRR290234	Cultivar	Hap I
Ankor	CRR290246	Cultivar	Hap I
TAM 111	CRR290256	Cultivar	Hap I
Niobrara	CRR290263	Cultivar	Hap I
TAM 400	CRR290265	Cultivar	Hap I
Akteur	SAMEA10944402	Cultivar	Hap I
Alceste	SAMEA10944309	Cultivar	Hap I
Alchemy	SAMEA10944403	Cultivar	Hap I
Alexander	SAMEA10944404	Cultivar	Hap I
Altigo	SAMEA10944405	Cultivar	Hap I
Ambition	SAMEA10944406	Cultivar	Hap I
Amundsen	SAMEA10944310	Cultivar	Hap I
Anapolis	SAMEA10944311	Cultivar	Hap I
Antonius	SAMEA10944407	Cultivar	Hap I
Aperitiv	SAMEA10944408	Cultivar	Hap I
Apostel	SAMEA10944312	Cultivar	Hap I
Arezzo	SAMEA10944313	Cultivar	Hap I
Arktis	SAMEA10944409	Cultivar	Hap I
Attraktion	SAMEA10944410	Cultivar	Hap I
Baguette11	SAMEA10944411	Cultivar	Hap I
Balaton	SAMEA10944412	Cultivar	Hap I
Banderola	SAMEA10944413	Cultivar	Hap I
Banquet	SAMEA10944315	Cultivar	Hap I
Barok	SAMEA10944414	Cultivar	Hap I
Batuta	SAMEA10944415	Cultivar	Hap I
Benchmark	SAMEA10944416	Cultivar	Hap I
Bogatka	SAMEA10944417	Cultivar	Hap I
Bombus	SAMEA10944419	Cultivar	Hap I
Boregar	SAMEA10944316	Cultivar	Hap I
Bosporus	SAMEA10944420	Cultivar	Hap I
Boss	SAMEA10944421	Cultivar	Hap I
Bruce	SAMEA10944422	Cultivar	Hap I
Bryza	SAMEA10944317	Cultivar	Hap I
BUENNO	SAMEA10944318	Cultivar	Hap I
Capone	SAMEA10944425	Cultivar	Hap I
Cassiopeia	SAMEA10944426	Cultivar	Hap I
CF_99007	SAMEA10944319	Cultivar	Hap I
Chiron	SAMEA10944320	Cultivar	Hap I
Colonia	SAMEA10944427	Cultivar	Hap I
Dialog	SAMEA10944321	Cultivar	Hap I
Dichter	SAMEA10944429	Cultivar	Hap I
Discus	SAMEA10944430	Cultivar	Hap I
Edward	SAMEA10944431	Cultivar	Hap I
Einstein	SAMEA10944432	Cultivar	Hap I
Elixer	SAMEA10944433	Cultivar	Hap I
Eriwan	SAMEA10944322	Cultivar	Hap I
Estivus	SAMEA10944434	Cultivar	Hap I
Eurojet	SAMEA10944435	Cultivar	Hap I
Expert	SAMEA10944436	Cultivar	Hap I
Famulus	SAMEA10944437	Cultivar	Hap I
Faustus	SAMEA10944438	Cultivar	Hap I
Figura	SAMEA10944439	Cultivar	Hap I
Finezja	SAMEA10944440	Cultivar	Hap I
Florian	SAMEA10944441	Cultivar	Hap I
Folklor	SAMEA10944442	Cultivar	Hap I
Franz	SAMEA10944443	Cultivar	Hap I
Fridolin	SAMEA10944444	Cultivar	Hap I
Gatsby	SAMEA10944445	Cultivar	Hap I
Gladiator	SAMEA10944446	Cultivar	Hap I
Glasgow	SAMEA10944323	Cultivar	Hap I
Glaucus	SAMEA10944447	Cultivar	Hap I
Globus	SAMEA10944448	Cultivar	Hap I
Gulliver	SAMEA10944324	Cultivar	Hap I
Gustav	SAMEA10944449	Cultivar	Hap I
Humber	SAMEA10944452	Cultivar	Hap I
Hyperion	SAMEA10944453	Cultivar	Hap I
Impression	SAMEA10944454	Cultivar	Hap I
Instinct	SAMEA10944455	Cultivar	Hap I
Intact	SAMEA10944456	Cultivar	Hap I
Intense	SAMEA10944457	Cultivar	Hap I
Izyda	SAMEA10944458	Cultivar	Hap I
Jantarka	SAMEA10944325	Cultivar	Hap I
Johnny	SAMEA10944459	Cultivar	Hap I
Joker	SAMEA10944460	Cultivar	Hap I
Julius	SAMEA10944461	Cultivar	Hap I
Kingdom	SAMEA10944463	Cultivar	Hap I
Kobiera	SAMEA10944464	Cultivar	Hap I
Kometus	SAMEA10944465	Cultivar	Hap I
Kranich	SAMEA10944467	Cultivar	Hap I
KWSBarny	SAMEA10944326	Cultivar	Hap I
KWSChamsin	SAMEA10944468	Cultivar	Hap I
KWSGymnast	SAMEA10944470	Cultivar	Hap I
KWSLoft	SAMEA10944471	Cultivar	Hap I
KWSMaddox	SAMEA10944327	Cultivar	Hap I
KWSMagic	SAMEA10944472	Cultivar	Hap I
KWSMilaneco	SAMEA10944473	Cultivar	Hap I
KWSMontana	SAMEA10944474	Cultivar	Hap I
KWSOzon	SAMEA10944475	Cultivar	Hap I
KWSPius	SAMEA10944476	Cultivar	Hap I
KWSSalix	SAMEA10944477	Cultivar	Hap I
KWSScirocco	SAMEA10944328	Cultivar	Hap I
Lahertis	SAMEA10944478	Cultivar	Hap I
Lars	SAMEA10944479	Cultivar	Hap I
Lear	SAMEA10944480	Cultivar	Hap I
Legenda	SAMEA10944481	Cultivar	Hap I
LGImposanto	SAMEA10944482	Cultivar	Hap I
LGKopernikus	SAMEA10944483	Cultivar	Hap I
LGMagirus	SAMEA10944484	Cultivar	Hap I
Linus	SAMEA10944485	Cultivar	Hap I
Magister	SAMEA10944488	Cultivar	Hap I
Manager	SAMEA10944489	Cultivar	Hap I
Marin	SAMEA10944330	Cultivar	Hap I
Markiza	SAMEA10944490	Cultivar	Hap I
Matrix	SAMEA10944491	Cultivar	Hap I
Memory	SAMEA10944331	Cultivar	Hap I
Mentor	SAMEA10944492	Cultivar	Hap I
Mescal	SAMEA10944332	Cultivar	Hap I
Midas	SAMEA10944493	Cultivar	Hap I
Monty	SAMEA10944495	Cultivar	Hap I
Mulan	SAMEA10944496	Cultivar	Hap I
Muskat	SAMEA10944497	Cultivar	Hap I
Musketeer	SAMEA10944498	Cultivar	Hap I
Muza	SAMEA10944499	Cultivar	Hap I
Nadobna	SAMEA10944500	Cultivar	Hap I
Nateja	SAMEA10944501	Cultivar	Hap I
Natula	SAMEA10944502	Cultivar	Hap I
Nelson	SAMEA10944503	Cultivar	Hap I
Nordkap	SAMEA10944504	Cultivar	Hap I
Norin	SAMEA10944505	Cultivar	Hap I
Ohio	SAMEA10944506	Cultivar	Hap I
OstkaStrzelecka	SAMEA10944507	Cultivar	Hap I
Oxal	SAMEA10944508	Cultivar	Hap I
Panorama	SAMEA10944510	Cultivar	Hap I
Partner	SAMEA10944511	Cultivar	Hap I
Patras	SAMEA10944512	Cultivar	Hap I
Pionier	SAMEA10944513	Cultivar	Hap I
Ponticus	SAMEA10944514	Cultivar	Hap I
Position	SAMEA10944515	Cultivar	Hap I
Primus	SAMEA10944516	Cultivar	Hap I
Rebell	SAMEA10944517	Cultivar	Hap I
RibbeckPZO	SAMEA10944520	Cultivar	Hap I
Rockefeller	SAMEA10944521	Cultivar	Hap I
Rubens	SAMEA10944522	Cultivar	Hap I
Rubisko	SAMEA10944523	Cultivar	Hap I
Rumor	SAMEA10944524	Cultivar	Hap I
Rywalka	SAMEA10944525	Cultivar	Hap I
Sailor	SAMEA10944526	Cultivar	Hap I
Satyna	SAMEA10944527	Cultivar	Hap I
Schamane	SAMEA10944529	Cultivar	Hap I
Sheriff	SAMEA10944531	Cultivar	Hap I
Smaragd	SAMEA10944533	Cultivar	Hap I
Smuga	SAMEA10944534	Cultivar	Hap I
Smuggler	SAMEA10944535	Cultivar	Hap I
Sobi	SAMEA10944536	Cultivar	Hap I
Sokrates	SAMEA10944538	Cultivar	Hap I
Solehio	SAMEA10944226	Cultivar	Hap I
Sophytra	SAMEA10944228	Cultivar	Hap I
SWHarnesk	SAMEA10944231	Cultivar	Hap I
SWHurtig	SAMEA10944233	Cultivar	Hap I
SWSkotte	SAMEA10944234	Cultivar	Hap I
SWTataros	SAMEA10944235	Cultivar	Hap I
SWTopper	SAMEA10944236	Cultivar	Hap I
Tarkus	SAMEA10944238	Cultivar	Hap I
Tonacja	SAMEA10944239	Cultivar	Hap I
Torkil	SAMEA10944240	Cultivar	Hap I
Torrild	SAMEA10944242	Cultivar	Hap I
Travix	SAMEA10944244	Cultivar	Hap I
Tuareg	SAMEA10944246	Cultivar	Hap I
Tukan	SAMEA10944247	Cultivar	Hap I
Velocity	SAMEA10944248	Cultivar	Hap I
Vitus	SAMEA10944249	Cultivar	Hap I
Welford	SAMEA10944250	Cultivar	Hap I
Xantippe	SAMEA10944251	Cultivar	Hap I
Xi19	SAMEA10944253	Cultivar	Hap I
Zappa	SAMEA10944400	Cultivar	Hap I
Zeppelin	SAMEA10944254	Cultivar	Hap I
Achat	SAMEA10944401	Cultivar	Hap I
Arina	SAMEA10944314	Cultivar	Hap I
Bussard	SAMEA10944423	Cultivar	Hap I
Caesar	SAMEA10944424	Cultivar	Hap I
Consort	SAMEA10944428	Cultivar	Hap I
Hereward	SAMEA10944451	Cultivar	Hap I
Kanzler	SAMEA10944462	Cultivar	Hap I
Korweta	SAMEA10944466	Cultivar	Hap I
Lynx	SAMEA10944486	Cultivar	Hap I
Macro	SAMEA10944487	Cultivar	Hap I
Malacca	SAMEA10944329	Cultivar	Hap I
Mewa	SAMEA10944333	Cultivar	Hap I
Mikon	SAMEA10944494	Cultivar	Hap I
Renan	SAMEA10944518	Cultivar	Hap I
Savannah	SAMEA10944528	Cultivar	Hap I
Semper	SAMEA10944530	Cultivar	Hap I
Slejpner	SAMEA10944532	Cultivar	Hap I
Soissons	SAMEA10944537	Cultivar	Hap I
Solist	SAMEA10944227	Cultivar	Hap I
Sperber	SAMEA10944229	Cultivar	Hap I
Stava	SAMEA10944230	Cultivar	Hap I
Symbol	SAMEA10944237	Cultivar	Hap I
Toronto	SAMEA10944241	Cultivar	Hap I
Tower	SAMEA10944243	Cultivar	Hap I
Trintella	SAMEA10944245	Cultivar	Hap I
Xenos	SAMEA10944252	Cultivar	Hap I
CI 12203	SRR10766633	Cultivar	Hap I
Bima 1	CRR062047	Cultivar	Hap I
Shijiazhuang 54	CRR062048	Cultivar	Hap I
Jinan 2	SRR10766565	Cultivar	Hap I
Boai 7023	SRR10766543	Cultivar	Hap I
Jinan 9	SRR10766532	Cultivar	Hap I
Ganmai 8	SRR10766620	Cultivar	Hap I
Lumai 14	SRR10766609	Cultivar	Hap I
Jimai 30	SRR10766598	Cultivar	Hap I
Yumai 13	SRR10766587	Cultivar	Hap I
Yumai 7	SRR10766581	Cultivar	Hap I
Mianyang 11	SRR10766578	Cultivar	Hap I
Mianyang 20	SRR10766575	Cultivar	Hap I
Shannongfu 63	SRR10766574	Cultivar	Hap I
Chuanmai 22	SRR10766573	Cultivar	Hap I
Bainong 3217	SRR10766571	Cultivar	Hap I
Yumai 2	SRR10766569	Cultivar	Hap I
Yangmai 5	SRR10766568	Cultivar	Hap I
Een 1	SRR10766564	Cultivar	Hap I
Lumai 21	SRR10766563	Cultivar	Hap I
Yannong 19	SRR10766562	Cultivar	Hap I
Jimai 20	CRR062080	Cultivar	Hap I
Yangmai 158	SRR10766559	Cultivar	Hap I
Jinan 17	SRR10766558	Cultivar	Hap I
Zhoumai 9	SRR10766555	Cultivar	Hap I
Yumai 18	SRR10766553	Cultivar	Hap I
Lumai 15	CRR062089	Cultivar	Hap I
Jimai 19	CRR062092	Cultivar	Hap I
Zhengmai 366	SRR10766546	Cultivar	Hap I
Handan 6172	SRR10766545	Cultivar	Hap I
Jimai 22	CRR062096	Cultivar	Hap I
Huaimai 20	SRR10766539	Cultivar	Hap I
Zhoumai 22	CRR062101	Cultivar	Hap I
Zhoumai 16	CRR062103	Cultivar	Hap I
Wuyimai	SRR10766531	Cultivar	Hap I
Funo	SRR10766529	Cultivar	Hap I
Bima 4	CRR062111	Cultivar	Hap I
Xinong 6028	SRR10766525	Cultivar	Hap I
Beijing 8	SRR10766520	Cultivar	Hap I
Orofen	SRR10766519	Cultivar	Hap I
Lovrin 10	SRR10766516	Cultivar	Hap I
Fan 6	SRR10766515	Cultivar	Hap I
Mexipak 66	SRR10766514	Cultivar	Hap I
Quality	SRR10766509	Cultivar	Hap I
Wilhelmina	SRR10766507	Cultivar	Hap I
Akagomughi	SRR10766506	Cultivar	Hap I
Zhongmai 66	SRR10766502	Cultivar	Hap I
Fengdecunmai 5	SRR10766501	Cultivar	Hap I
Chuanmai 42	SRR10766500	Cultivar	Hap I
Zhongmai 175	SRR10766496	Cultivar	Hap I
Jinmai 47	SRR10766495	Cultivar	Hap I
Liangxing 66	SRR10766493	Cultivar	Hap I
Liangxing 99	SRR10766492	Cultivar	Hap I
Sumai 3	CRR062143	Cultivar	Hap I
Yannong 21	SRR10766490	Cultivar	Hap I
Bainong 4199	SRR10766629	Cultivar	Hap I
Xumai 856	SRR10766628	Cultivar	Hap I
Xumai 35	SRR10766627	Cultivar	Hap I
Lunxuan 987	SRR10766625	Cultivar	Hap I
Xiaoyan 22	SRR10766624	Cultivar	Hap I
Jining 3	SRR10766601	Cultivar	Hap I
Yanshi 4	SRR10766600	Cultivar	Hap I
Xinong 65	SRR10766597	Cultivar	Hap I
Jinmai 10	SRR10766596	Cultivar	Hap I
Autonomia	SRR10766594	Cultivar	Hap I
Kechun 14	SRR10766591	Cultivar	Hap I
Villa Glori	SRR10766589	Cultivar	Hap I
San Pastore	SRR10766585	Cultivar	Hap I
Neuzucht	SRR10766582	Cultivar	Hap I
FRA-C1	SRR7164604	Cultivar	Hap I
NLD-C1	SRR7164628	Cultivar	Hap I
YNSW	SRR7256797	Cultivar	Hap I
ZDSH	SRR7164688	Cultivar	Hap I
KFSH	SRR7164634	Cultivar	Hap I
PYEQ	SRR7164681	Cultivar	Hap I
JM8H	SRR7164685	Cultivar	Hap I
CZ6406	SRR7164691	Cultivar	Hap I
KFEH	SRR7164652	Cultivar	Hap I
BJBH	SRR7256741	Cultivar	Hap I
C42	S7	Cultivar	Hap I
K35	CRR289917	Cultivar	Hap I
Zhengmai98	CRR289923	Cultivar	Hap I
Yumai57	CRR289925	Cultivar	Hap I
Zhengzi8709-4-4	CRR289931	Cultivar	Hap I
Shannong20	CRR289948	Cultivar	Hap I
Hanmai13	CRR289957	Cultivar	Hap I
ShiB05-7388	CRR289965	Cultivar	Hap I
Chang6154	CRR289976	Cultivar	Hap I
Jimai585	CRR289984	Cultivar	Hap I
C104	CRR289987	Cultivar	Hap I
Shanyou225	CRR289992	Cultivar	Hap I
Zhoumai13	CRR289994	Cultivar	Hap I
Taishan4033	CRR289997	Cultivar	Hap I
Yumai34	CRR290003	Cultivar	Hap I
Zhengyou7	CRR290017	Cultivar	Hap I
Xiaoyan15	CRR290019	Cultivar	Hap I
Yuzhan89106	CRR290030	Cultivar	Hap I
Zhengpinmai25	CRR290034	Cultivar	Hap I
Lumai5	CRR290043	Cultivar	Hap I
Yubao1	CRR290075	Cultivar	Hap I
Kenong199	CRR290082	Cultivar	Hap I
Huapei6	CRR290086	Cultivar	Hap I
Chuanmai7201	CRR290096	Cultivar	Hap I
Xiaoyan4	CRR290106	Cultivar	Hap I
Huaimai22	CRR290117	Cultivar	Hap I
Xiaoyan503	CRR290148	Cultivar	Hap I
Kenong1006	CRR290151	Cultivar	Hap I
Jinmai49	CRR290153	Cultivar	Hap I
Luohan11	CRR290171	Cultivar	Hap I
Zhaomin1006-08X3	CRR290203	Cultivar	Hap I
Kenong2007	CRR290204	Cultivar	Hap I
Liangfeng998	CRR290206	Cultivar	Hap I
Zhengmai336	CRR290208	Cultivar	Hap I
Kenong9204	CRR290209	Cultivar	Hap I
Zhengmai1066	CRR290210	Cultivar	Hap I
Shixin828	CRR290231	Cultivar	Hap I
Luohan13	CRR290241	Cultivar	Hap I
Huaimai25	CRR290253	Cultivar	Hap I
Shixin733	CRR290257	Cultivar	Hap I
Zhao08-29	CRR290264	Cultivar	Hap I
Chang6359	CRR290266	Cultivar	Hap I
Han4589	CRR290267	Cultivar	Hap I
PF001	SAMEA10944144	Cultivar	Hap I
PF002	SAMEA10944145	Cultivar	Hap I
PF003	SAMEA10944146	Cultivar	Hap I
PF004	SAMEA10944147	Cultivar	Hap I
PF005	SAMEA10944148	Cultivar	Hap I
PF006	SAMEA10944149	Cultivar	Hap I
PF007	SAMEA10944150	Cultivar	Hap I
PF008	SAMEA10944151	Cultivar	Hap I
PF009	SAMEA10944152	Cultivar	Hap I
PF010	SAMEA10944153	Cultivar	Hap I
PF011	SAMEA10944154	Cultivar	Hap I
PF012	SAMEA10944155	Cultivar	Hap I
PF013	SAMEA10944156	Cultivar	Hap I
PF014	SAMEA10944157	Cultivar	Hap I
PF016	SAMEA10944159	Cultivar	Hap I
PF017	SAMEA10944160	Cultivar	Hap I
PF018	SAMEA10944161	Cultivar	Hap I
PF019	SAMEA10944162	Cultivar	Hap I
PF020	SAMEA10944163	Cultivar	Hap I
PF021	SAMEA10944164	Cultivar	Hap I
PF022	SAMEA10944165	Cultivar	Hap I
PF023	SAMEA10944166	Cultivar	Hap I
PF024	SAMEA10944167	Cultivar	Hap I
PF025	SAMEA10944168	Cultivar	Hap I
PF026	SAMEA10944169	Cultivar	Hap I
PF027	SAMEA10944170	Cultivar	Hap I
PF028	SAMEA10944171	Cultivar	Hap I
PF029	SAMEA10944172	Cultivar	Hap I
PF030	SAMEA10944173	Cultivar	Hap I
PF031	SAMEA10944174	Cultivar	Hap I
PF032	SAMEA10944175	Cultivar	Hap I
PF033	SAMEA10944176	Cultivar	Hap I
PF034	SAMEA10944177	Cultivar	Hap I
PF035	SAMEA10944178	Cultivar	Hap I
PF036	SAMEA10944179	Cultivar	Hap I
PF037	SAMEA10944180	Cultivar	Hap I
PF039	SAMEA10944182	Cultivar	Hap I
PF040	SAMEA10944183	Cultivar	Hap I
PF041	SAMEA10944184	Cultivar	Hap I
PF042	SAMEA10944185	Cultivar	Hap I
PF043	SAMEA10944186	Cultivar	Hap I
PF044	SAMEA10944187	Cultivar	Hap I
PF045	SAMEA10944188	Cultivar	Hap I
PF046	SAMEA10944189	Cultivar	Hap I
PF047	SAMEA10944190	Cultivar	Hap I
PF048	SAMEA10944191	Cultivar	Hap I
PF049	SAMEA10944192	Cultivar	Hap I
PF050	SAMEA10944193	Cultivar	Hap I
PF051	SAMEA10944194	Cultivar	Hap I
PF052	SAMEA10944195	Cultivar	Hap I
PF053	SAMEA10944196	Cultivar	Hap I
PF054	SAMEA10944197	Cultivar	Hap I
PF055	SAMEA10944198	Cultivar	Hap I
PF056	SAMEA10944199	Cultivar	Hap I
PF057	SAMEA10944200	Cultivar	Hap I
PF058	SAMEA10944201	Cultivar	Hap I
PF059	SAMEA10944202	Cultivar	Hap I
PF060	SAMEA10944203	Cultivar	Hap I
PF061	SAMEA10944204	Cultivar	Hap I
PF062	SAMEA10944205	Cultivar	Hap I
PF063	SAMEA10944206	Cultivar	Hap I
PF064	SAMEA10944207	Cultivar	Hap I
PF065	SAMEA10944208	Cultivar	Hap I
PF066	SAMEA10944209	Cultivar	Hap I
PF067	SAMEA10944210	Cultivar	Hap I
PF068	SAMEA10944211	Cultivar	Hap I
PF069	SAMEA10944212	Cultivar	Hap I
PF070	SAMEA10944213	Cultivar	Hap I
PF071	SAMEA10944214	Cultivar	Hap I
PF072	SAMEA10944215	Cultivar	Hap I
PF073	SAMEA10944216	Cultivar	Hap I
PF074	SAMEA10944217	Cultivar	Hap I
PF075	SAMEA10944218	Cultivar	Hap I
PF076	SAMEA10944219	Cultivar	Hap I
PF077	SAMEA10944220	Cultivar	Hap I
PF078	SAMEA10944221	Cultivar	Hap I
PF079	SAMEA10944222	Cultivar	Hap I
PF080	SAMEA10944223	Cultivar	Hap I
PF081	SAMEA10944224	Cultivar	Hap I
PF082	SAMEA10944225	Cultivar	Hap I
PF083	SAMEA10944255	Cultivar	Hap I
PF084	SAMEA10944256	Cultivar	Hap I
PF085	SAMEA10944257	Cultivar	Hap I
PF087	SAMEA10944259	Cultivar	Hap I
PF088	SAMEA10944260	Cultivar	Hap I
PF089	SAMEA10944261	Cultivar	Hap I
PF090	SAMEA10944262	Cultivar	Hap I
PF091	SAMEA10944263	Cultivar	Hap I
PF093	SAMEA10944265	Cultivar	Hap I
PF094	SAMEA10944266	Cultivar	Hap I
PF097	SAMEA10944269	Cultivar	Hap I
PF098	SAMEA10944270	Cultivar	Hap I
PF099	SAMEA10944271	Cultivar	Hap I
PF100	SAMEA10944272	Cultivar	Hap I
PF101	SAMEA10944273	Cultivar	Hap I
PF102	SAMEA10944274	Cultivar	Hap I
PF103	SAMEA10944275	Cultivar	Hap I
PF104	SAMEA10944276	Cultivar	Hap I
PF105	SAMEA10944277	Cultivar	Hap I
PF106	SAMEA10944278	Cultivar	Hap I
PF107	SAMEA10944279	Cultivar	Hap I
PF108	SAMEA10944280	Cultivar	Hap I
PF109	SAMEA10944281	Cultivar	Hap I
PF110	SAMEA10944282	Cultivar	Hap I
PF111	SAMEA10944283	Cultivar	Hap I
PF112	SAMEA10944284	Cultivar	Hap I
PF113	SAMEA10944285	Cultivar	Hap I
PF114	SAMEA10944286	Cultivar	Hap I
PF115	SAMEA10944287	Cultivar	Hap I
PF116	SAMEA10944288	Cultivar	Hap I
PF117	SAMEA10944289	Cultivar	Hap I
PF118	SAMEA10944290	Cultivar	Hap I
PF119	SAMEA10944291	Cultivar	Hap I
PF120	SAMEA10944292	Cultivar	Hap I
PM001	SAMEA10944293	Cultivar	Hap I
PM002	SAMEA10944294	Cultivar	Hap I
PM003	SAMEA10944295	Cultivar	Hap I
PM004	SAMEA10944296	Cultivar	Hap I
PM005	SAMEA10944297	Cultivar	Hap I
PM006	SAMEA10944298	Cultivar	Hap I
PM007	SAMEA10944299	Cultivar	Hap I
PM008	SAMEA10944300	Cultivar	Hap I
PM009	SAMEA10944301	Cultivar	Hap I
PM010	SAMEA10944302	Cultivar	Hap I
PM011	SAMEA10944303	Cultivar	Hap I
PM012	SAMEA10944304	Cultivar	Hap I
PM013	SAMEA10944305	Cultivar	Hap I
PM014	SAMEA10944306	Cultivar	Hap I
PM015	SAMEA10944307	Cultivar	Hap I
23891	S122	Landrace	Hap II
23923	S125	Landrace	Hap II
23971	S126	Landrace	Hap II
23974	S127	Landrace	Hap II
24185	S133	Landrace	Hap II
IG21134470	S205	Landrace	Hap II
S206	S206	Landrace	Hap II
S207	S207	Landrace	Hap II
YT-6	ZY-6	Landrace	Hap II
YT-2	ZY-56	Landrace	Hap II
YT-19	ZY-57	Landrace	Hap II
YT-32	ZY-59	Landrace	Hap II
YN098	S175	Landrace	Hap II
YN109	S176	Landrace	Hap II
YN156	S177	Landrace	Hap II
YN241	S178	Landrace	Hap II
YN411	S179	Landrace	Hap II
M-1	S170	Landrace	Hap II
M-20	S171	Landrace	Hap II
M-29	S172	Landrace	Hap II
M-81	S173	Landrace	Hap II
M-90	S174	Landrace	Hap II
3970	ZY-53	Landrace	Hap II
3987	ZY-54	Landrace	Hap II
3989	ZY-55	Landrace	Hap II
AS362	AS362	Landrace	Hap II
AS356	AS356	Landrace	Hap II
18C-429	18C-429	Landrace	Hap II
18C-430	18C-430	Landrace	Hap II
18C-448	18C-448	Landrace	Hap II
18C-450	18C-450	Landrace	Hap II
AS1289	S4	Landrace	Hap II
As1301	ZY-46	Landrace	Hap II
As1316	ZY-47	Landrace	Hap II
As1348	ZY-48	Landrace	Hap II
As1405	ZY-49	Landrace	Hap II
As1494	ZY-50	Landrace	Hap II
As1511	ZY-51	Landrace	Hap II
As1523	ZY-52	Landrace	Hap II
As1516	S72	Landrace	Hap II
As1373	S74	Landrace	Hap II
As1297	S76	Landrace	Hap II
As1409	S77	Landrace	Hap II
As1340	S78	Landrace	Hap II
As1483	S79	Landrace	Hap II
As1503	S80	Landrace	Hap II
As1500	S81	Landrace	Hap II
As2065	S82	Landrace	Hap II
As2064	S83	Landrace	Hap II
As2050	S84	Landrace	Hap II
As1407	S87	Landrace	Hap II
As1508	S88	Landrace	Hap II
As1526	S89	Landrace	Hap II
As1525	S90	Landrace	Hap II
As1521	S91	Landrace	Hap II
As1284	S92	Landrace	Hap II
zang1817	Zang1817	Landrace	Hap II
XM001203	S1	Landrace	Hap II
XM001274	S2	Landrace	Hap II
XM001387	S3	Landrace	Hap II
zuogongsuisuixiaomai1	ZY-16	Landrace	Hap II
jiachasuisuixiaomai8	ZY-17	Landrace	Hap II
jiachasuisuixiaomai27	ZY-18	Landrace	Hap II
jiachasuisuixiaomai32	ZY-19	Landrace	Hap II
jiachasuisuixiaomai33	ZY-20	Landrace	Hap II
jiachasuisuixiaomai34	ZY-21	Landrace	Hap II
langxiansuisuixiaomai9	ZY-22	Landrace	Hap II
langxiansuisuixiaomai15	ZY-23	Landrace	Hap II
langxiansuisuixiaomai17	ZY-24	Landrace	Hap II
longzisuisuixiaomai10	ZY-25	Landrace	Hap II
longzisuisuixiaomai11	ZY-26	Landrace	Hap II
longzisuisuixiaomai17	ZY-27	Landrace	Hap II
longzisuisuixiaomai23	ZY-28	Landrace	Hap II
longzisuisuixiaomai24	ZY-29	Landrace	Hap II
chayazheda14	ZY-30	Landrace	Hap II
chayazheda18	ZY-31	Landrace	Hap II
chayazheda19	ZY-32	Landrace	Hap II
jiachazheda9	ZY-34	Landrace	Hap II
jiachazheda55	ZY-35	Landrace	Hap II
jiachazheda63	ZY-36	Landrace	Hap II
langxianzheda3	ZY-37	Landrace	Hap II
langxianzheda20	ZY-39	Landrace	Hap II
langxianzheda35	ZY-40	Landrace	Hap II
longzizheda9	ZY-42	Landrace	Hap II
longzizheda19	ZY-43	Landrace	Hap II
langxiansuisuixiaomai6	S143	Landrace	Hap II
langxiansuisuixiaomai18	S144	Landrace	Hap II
chayazheda49	S145	Landrace	Hap II
jiachazheda28	S146	Landrace	Hap II
jiachazheda37	S147	Landrace	Hap II
jiachazheda39	S148	Landrace	Hap II
langxianzheda5	S149	Landrace	Hap II
langxianzheda7	S151	Landrace	Hap II
langxianzheda16	S152	Landrace	Hap II
langxianzheda17	S153	Landrace	Hap II
langxianzheda25	S154	Landrace	Hap II
longzizheda15	S155	Landrace	Hap II
longzizheda22	S156	Landrace	Hap II
longzizheda23	S158	Landrace	Hap II
longzizheda29	S160	Landrace	Hap II
longzizheda32	S161	Landrace	Hap II
longzizheda34	S162	Landrace	Hap II
longzizheda48	S163	Landrace	Hap II
longzizheda57	S164	Landrace	Hap II
longzizheda62	S165	Landrace	Hap II
Z1B10122	S255	Landrace	Hap II
Z1B27343	S256	Landrace	Hap II
Z1B10123	S257	Landrace	Hap II
Z1B27323	S258	Landrace	Hap II
Z1B10164	S259	Landrace	Hap II
Z1B10165	S260	Landrace	Hap II
Z1B10166	S261	Landrace	Hap II
Z1B10186	S262	Landrace	Hap II
Z1B27331	S264	Landrace	Hap II
Z1B10204	S265	Landrace	Hap II
Z1B10226	S266	Landrace	Hap II
Z1B27330	S267	Landrace	Hap II
Z1B10236	S268	Landrace	Hap II
lanhuamai	S240	Landrace	Hap II
bendihuanghuamai	S242	Landrace	Hap II
zhahong	S243	Landrace	Hap II
motuoxiaomai	S244	Landrace	Hap II
bianbachunmai6	S245	Landrace	Hap II
baimangxiaomai	S246	Landrace	Hap II
wujiangzhuo	S247	Landrace	Hap II
muzongzhuoga	S248	Landrace	Hap II
kangdingxiaomai	S249	Landrace	Hap II
yizhimai	S250	Landrace	Hap II
huoliyan	S251	Landrace	Hap II
hongdongmai	S253	Landrace	Hap II
hongjinbaoyin	S254	Landrace	Hap II
As1658	S93	Landrace	Hap II
As1666	S94	Landrace	Hap II
As1587	S95	Landrace	Hap II
As1635	S96	Landrace	Hap II
As1588	S97	Landrace	Hap II
As1668	S98	Landrace	Hap II
As1661	S99	Landrace	Hap II
As1670	S100	Landrace	Hap II
Bauländer Spelz	S115	Landrace	Hap II
Holstenkorn	S117	Landrace	Hap II
Kippenhauser	S118	Landrace	Hap II
Lignee	S119	Landrace	Hap II
Ostro	S120	Landrace	Hap II
Zuzger	S121	Landrace	Hap II
Altgold	ZY-7	Landrace	Hap II
3418	ZY-8	Landrace	Hap II
Hubel	ZY-9	Landrace	Hap II
chunxiaomai	S182	Landrace	Hap II
mazhamai	S183	Landrace	Hap II
xiaosanyuehuang	S184	Landrace	Hap II
dingxingzhai	S180	Landrace	Hap II
baihuomai	S181	Landrace	Hap II
xishanbiansui	S185	Landrace	Hap II
baibiansui	S186	Landrace	Hap II
dalibanmang	S187	Landrace	Hap II
laolaixia	S188	Landrace	Hap II
xiaohongmai	S110	Landrace	Hap II
xiaomai	S111	Landrace	Hap II
maohongmai	S112	Landrace	Hap II
liuyuehuang	S113	Landrace	Hap II
shanmai	S108	Landrace	Hap II
tutoumai	S109	Landrace	Hap II
dabaimai	S103	Landrace	Hap II
baimuxiban	S104	Landrace	Hap II
honghuosui	S105	Landrace	Hap II
dabaitou	S106	Landrace	Hap II
pingyuan50	ZY-10	Landrace	Hap II
Yanda1817	ZY-11	Landrace	Hap II
Yanda 1817	CRR062105	Landrace	Hap II
Jiangdongmen	SRR10766530	Landrace	Hap II
Youzimai	SRR10766524	Landrace	Hap II
Mazhamai	CRR062114	Landrace	Hap II
Chengduguangtou	SRR10766522	Landrace	Hap II
Chinses Spring	CRR062130	Landrace	Hap II
Wangshuibai	SRR10766504	Landrace	Hap II
Fumai	SRR10766503	Landrace	Hap II
Qiangweimai	SRR10766621	Landrace	Hap II
Gatuo	SRR10766619	Landrace	Hap II
Baishanmai	SRR10766618	Landrace	Hap II
Youzitou	SRR10766617	Landrace	Hap II
Guangtoubaishenmai	SRR10766615	Landrace	Hap II
Chanbuzhi	SRR10766614	Landrace	Hap II
Zaoxiaomai	SRR10766613	Landrace	Hap II
Paozimai	SRR10766612	Landrace	Hap II
Sanyuehuang	SRR10766611	Landrace	Hap II
Huoliyan	CRR062167	Landrace	Hap II
Baimazha	SRR10766606	Landrace	Hap II
Baihuamai	SRR10766605	Landrace	Hap II
Zhushimai	SRR10766604	Landrace	Hap II
DHM	SRR7164684	Landrace	Hap II
HMM	SRR7164655	Landrace	Hap II
LM	LM5-8	Landrace	Hap II
BYM	SRR7164588	Landrace	Hap II
BMZ	SRR7164659	Landrace	Hap II
BQM	SRR7164674	Landrace	Hap II
JiaHM	JiaHM_770-773	Landrace	Hap II
LTT	SRR7164677	Landrace	Hap II
HM	SRR7164672	Landrace	Hap II
TMM	SRR7164641	Landrace	Hap II
DKM	SRR7164673	Landrace	Hap II
YMBF	SRR7164649	Landrace	Hap II
YZM	SRR7164675	Landrace	Hap II
XFS	SRR7164682	Landrace	Hap II
ZWT	SRR7164683	Landrace	Hap II
MXM	SRR7164686	Landrace	Hap II
WYM	SRR7164632	Landrace	Hap II
SRM4H	SRR7164687	Landrace	Hap II
LZT	SRR7164676	Landrace	Hap II
SLZ	SRR7164639	Landrace	Hap II
LXZXM	SRR7164637	Landrace	Hap II
CYHM	SRR7411951	Landrace	Hap II
DYH	SRR7164584	Landrace	Hap II
ZP	SRR7164643	Landrace	Hap II
LGD	SRR7164653	Landrace	Hap II
QCM	SRR7164661	Landrace	Hap II
TJBXM	SRR7164680	Landrace	Hap II
HCM	SRR7164656	Landrace	Hap II
YM	SRR7164646	Landrace	Hap II
BDHHM	SRR7164690	Landrace	Hap II
XHP	SRR7164633	Landrace	Hap II
JinHM	SRR7164644	Landrace	Hap II
SM	SRR7164640	Landrace	Hap II
HTZ	SRR7164582	Landrace	Hap II
DXHKYM	SRR7164591	Landrace	Hap II
KSBP	KSBP_778-780-695	Landrace	Hap II
Huangmangbai	CRR289915	Landrace	Hap II
W157	CRR289916	Landrace	Hap II
Misria	CRR289927	Landrace	Hap II
TJK04-379	CRR289928	Landrace	Hap II
TJK04-3	CRR289932	Landrace	Hap II
Kandihari	CRR289934	Landrace	Hap II
Gandom	CRR289940	Landrace	Hap II
TJK2006:204	CRR289943	Landrace	Hap II
L8	CRR289950	Landrace	Hap II
IWA8604270	CRR289952	Landrace	Hap II
86PK1272-001.00	CRR289954	Landrace	Hap II
Hongyouzi	CRR289963	Landrace	Hap II
Dame	CRR289969	Landrace	Hap II
86PK1306-002.00	CRR289981	Landrace	Hap II
Gandom-i-Safade	CRR289986	Landrace	Hap II
Baixiaomangmai	CRR289990	Landrace	Hap II
IWA8614070	CRR290004	Landrace	Hap II
K17	CRR290006	Landrace	Hap II
Type No. 23-2	CRR290008	Landrace	Hap II
Type No. 25	CRR290016	Landrace	Hap II
Hong Huo Mai	CRR290029	Landrace	Hap II
Tirmai	CRR290042	Landrace	Hap II
PNE 226-2	CRR290047	Landrace	Hap II
Xinyang75256	CRR290050	Landrace	Hap II
Type No. 14	CRR290061	Landrace	Hap II
Guang Siu Zi	CRR290068	Landrace	Hap II
IWA8608636	CRR290069	Landrace	Hap II
Type No. 7	CRR290074	Landrace	Hap II
IWA8607807	CRR290077	Landrace	Hap II
IWA8604735	CRR290083	Landrace	Hap II
IWA8604731	CRR290084	Landrace	Hap II
Hulutou	CRR290085	Landrace	Hap II
L3B	CRR290089	Landrace	Hap II
Sadabozu 1	CRR290092	Landrace	Hap II
PNE 226-1	CRR290102	Landrace	Hap II
Gandom-i-Safadek	CRR290103	Landrace	Hap II
IWA8612682	CRR290107	Landrace	Hap II
W128	CRR290111	Landrace	Hap II
W168	CRR290114	Landrace	Hap II
IWA8604628	CRR290122	Landrace	Hap II
IWA8604010	CRR290123	Landrace	Hap II
Nyu Bai	CRR290132	Landrace	Hap II
Lankaoaizao8	CRR290135	Landrace	Hap II
Type No. 23-1	CRR290142	Landrace	Hap II
Sanshukomugi	CRR290143	Landrace	Hap II
IWA8604006	CRR290160	Landrace	Hap II
K18	CRR290161	Landrace	Hap II
W125	CRR290164	Landrace	Hap II
W120	CRR290181	Landrace	Hap II
86PK1305-001.00	CRR290185	Landrace	Hap II
Type No. 13	CRR290186	Landrace	Hap II
Yu Hua Zi	CRR290195	Landrace	Hap II
Xiaobaimang	CRR290197	Landrace	Hap II
TJK04-420	CRR290215	Landrace	Hap II
S-10	CRR290219	Landrace	Hap II
86PK1307-001.00	CRR290224	Landrace	Hap II
Baigeda	CRR290226	Landrace	Hap II
Wuhuatou	CRR290229	Landrace	Hap II
Gandum	CRR290232	Landrace	Hap II
IWA8604850	CRR290237	Landrace	Hap II
W167	CRR290240	Landrace	Hap II
FAO 33.214	CRR290250	Landrace	Hap II
Ermangmai	CRR290254	Landrace	Hap II
86PK1308-001.11	CRR290255	Landrace	Hap II
K397	CRR290262	Landrace	Hap II
Tir	CRR290269	Landrace	Hap II
23896	S123	Landrace	Hap I
23909	S124	Landrace	Hap I
23977	S128	Landrace	Hap I
23989	S129	Landrace	Hap I
23995	S130	Landrace	Hap I
24056	S131	Landrace	Hap I
24184	S132	Landrace	Hap I
24193	S134	Landrace	Hap I
IG21134349	S203	Landrace	Hap I
IG21134447	S204	Landrace	Hap I
5120	S208	Landrace	Hap I
YT-31	ZY-58	Landrace	Hap I
AS360	AS360	Landrace	Hap I
AS1772	ZY-5	Landrace	Hap I
tiegonghongmai	ZY-14	Landrace	Hap I
As1513	S73	Landrace	Hap I
As1367	S75	Landrace	Hap I
As1342	S86	Landrace	Hap I
chayazheda32	ZY-33	Landrace	Hap I
langxianzheda4	ZY-38	Landrace	Hap I
longzizheda4	ZY-41	Landrace	Hap I
longzizheda27	ZY-44	Landrace	Hap I
sangrizheda21	ZY-45	Landrace	Hap I
langxianzheda6	S150	Landrace	Hap I
longzizheda23	S157	Landrace	Hap I
longzizheda28	S159	Landrace	Hap I
sangrizheda3	S166	Landrace	Hap I
sangrizheda4	S167	Landrace	Hap I
sangrizheda6	S168	Landrace	Hap I
sangrizheda7	S169	Landrace	Hap I
gejiaxiang	S241	Landrace	Hap I
hongchunmai	S252	Landrace	Hap I
Emilius	S116	Landrace	Hap I
duanbaimai	S114	Landrace	Hap I
hongqimai	S101	Landrace	Hap I
duanyaomai	S102	Landrace	Hap I
Laogaidaqingmang	SRR10766622	Landrace	Hap I
Hezhoudamai	SRR10766616	Landrace	Hap I
Zijiehong	SRR10766610	Landrace	Hap I
Galaohan	SRR10766608	Landrace	Hap I
HLM	SRR7256757	Landrace	Hap I
ZJH	SRR7164648	Landrace	Hap I
JM	SRR7164657	Landrace	Hap I
CSB	SRR7164589	Landrace	Hap I
LLX	SRR7256781	Landrace	Hap I
HZB	SRR7280765	Landrace	Hap I
86PK1308-001.07	CRR289914	Landrace	Hap I
79TK112-1067B	CRR289918	Landrace	Hap I
Hawasia	CRR289929	Landrace	Hap I
Karakilcik	CRR289930	Landrace	Hap I
Kirmizi Yazlik	CRR289933	Landrace	Hap I
40b	CRR289941	Landrace	Hap I
Cankiri	CRR289953	Landrace	Hap I
Chul	CRR289962	Landrace	Hap I
FAO 33.213	CRR289964	Landrace	Hap I
Homara Mania	CRR289967	Landrace	Hap I
Yosifia	CRR289970	Landrace	Hap I
TJK03-195	CRR289980	Landrace	Hap I
Homara	CRR289982	Landrace	Hap I
Mania	CRR289983	Landrace	Hap I
Floransa	CRR289995	Landrace	Hap I
B-872	CRR290005	Landrace	Hap I
86PK1304-001.00	CRR290013	Landrace	Hap I
Damaskus 6	CRR290018	Landrace	Hap I
79TK104-552B	CRR290020	Landrace	Hap I
TU86-14-04-1	CRR290027	Landrace	Hap I
Kasisik	CRR290031	Landrace	Hap I
Yumusak B	CRR290040	Landrace	Hap I
79TK098-516	CRR290049	Landrace	Hap I
79TK100-531A-2	CRR290063	Landrace	Hap I
Kendiharia	CRR290072	Landrace	Hap I
Aleppo 32	CRR290073	Landrace	Hap I
79TK098-519A	CRR290098	Landrace	Hap I
Normal Yumusak	CRR290105	Landrace	Hap I
Kunduru Menceki	CRR290115	Landrace	Hap I
TJK03-295	CRR290120	Landrace	Hap I
Kamchtka	CRR290125	Landrace	Hap I
79TK109-595	CRR290128	Landrace	Hap I
Kilcikiz	CRR290138	Landrace	Hap I
C-1	CRR290150	Landrace	Hap I
Red Kamsereti	CRR290155	Landrace	Hap I
79TK104-548B	CRR290163	Landrace	Hap I
B-941	CRR290173	Landrace	Hap I
Karmir	CRR290175	Landrace	Hap I
D-2	CRR290187	Landrace	Hap I
TU86-13-07	CRR290189	Landrace	Hap I
84TK056-140.1	CRR290191	Landrace	Hap I
Floransa C	CRR290198	Landrace	Hap I
Kamrakhat	CRR290202	Landrace	Hap I
B-938	CRR290213	Landrace	Hap I
Aleppo 1	CRR290214	Landrace	Hap I
Floransa B	CRR290225	Landrace	Hap I
TU85-082-01	CRR290230	Landrace	Hap I
Shirokawa Shiro	CRR290235	Landrace	Hap I
Jishi42	CRR290238	Landrace	Hap I
84TK105-056.0	CRR290239	Landrace	Hap I
IWA8604165	CRR290247	Landrace	Hap I
Sari	CRR290259	Landrace	Hap I
Type No. 19H	CRR290268	Landrace	Hap I

## Sheet: Supplementary Table 9
Supplementary Table 9. Primers (5'-3') used in this study.
Primers	Primer Sequences (5'-3')	Description
TaDT1-p411-F	ATATATGGTCTCTGGCGGTGACGGGAGCGTGTCCAAGTT	TaDT1 CRISPR knock out lines
TaDT1-p411-F0	TGGTGACGGGAGCGTGTCCAAGTTTTAGAGCTAGAAATAGC
TaDT1-p411-R0	AACCGCCGTGTCCGAGCCGGCGCGCTTCTTGGTGCC
TaDT1-p411-R	ATTATTGGTCTCTAAACCGCCGTGTCCGAGCCGGCGC
TaATG8-p411-F	ATATATGGTCTCTGGCGGCGGAGGCTACCCGCATAAGTT	TaATG8 CRISPR knock out lines
TaATG8-p411-F0	TGGCGGAGGCTACCCGCATAAGTTTTAGAGCTAGAAATAGC
TaATG8-p411-R0	AACGCTTGAACGA GCTCTTCGCCGCTTCTTGGTGCC
TaATG8-p411-R	ATTATTGGTCTCTAAACGCTTGAACGA GCTCTTCGCC
TaATG18-p411-F	AATAATGGTCTCAAGCGCGGCGGAAGATCTCGCGGA	TaATG18 CRISPR knock out lines
TaATG18-p411-F0	GCGGCGGAAGATCTCGCGGAGTTTTAGAGCTAGAAATAGC
TaATG18-p411-R0	ATGCAGCGGCTCTGGTGGTCGCTTCTTGGTGCC
TaATG18-p411-R	ATTATTGGTCTCTAAACATGCAGCGGCTCTGGTGGT
TaCOS1-p411-F	AATAATGGTCTCAAGCGTGACTCCTTGGAGCCTGGT	TaCOS1 CRISPR knock out lines
TaCOS1-p411-F0	GTGACTCCTTGGAGCCTGGTGTTTTAGAGCTAGAAATAGC
TaCOS1-p411-R0	CAAGATTCACGCTTGCTTTCGCTTCTTGGTGCC
TaCOS1-p411-R	ATTATTGGTCTCTAAACCAAGATTCACGCTTGCTTT
TaDT1-p110-F1	AGGTCGACTCTAGAGGATCC ATGATGACCATGGATCTGA	TaDT1 over-expression lines/ Co-IP assay
TaDT1-p110-R2	TCGAGAGGTCCTTGGAAAAGGAGCTCCGGTAGCGGGG
TaDT1-p110-F3	CCCCGCTACCGGAGCTCCTTTTCCAAGGACCTCTCGA
TaDT1-p110-R4	TCGAGGGTACCCGGGGATCCTCAAAGCTTGGATCCACTA
TaMYC2-p110-F	AGGTCGACTCTAGAGGATCCATGAACCTGTGGACGGACGA	TaMYC2 over-expression lines
TaMYC2-p110-R	TCGAGGGTACCCGGGGATCCTTACCGGATTTGCATCGCGG
TaATG8-p110-F	AGGTCGACTCTAGAGGATCCATGGCGAAGAGCTCGTTCAA	TaATG8 over-expression lines
TaATG8-p110-R	TCGAGGGTACCCGGGGATCCCTAGAGCAATCCGAAGGTGT
TaATG18-p110-F	AGGTCGACTCTAGAGGATCCATGGCGACGCCCGCCCTGCCA	TaATG18 over-expression lines
TaATG18-p110-R	TCGAGGGTACCCGGGGATCCCTACGGCTGATCTGATGGTT
TaCOS1-p110-F1	AGGTCGACTCTAGAGGATCCATGATCCGACCAGGCTCCA	TaCOS1 over-expression lines
TaCOS1-p110-R2	TCCTCGCCCTTGCTCACCATGTCAGCGTATTTGACATCT
TaCOS1-p110-F3	CAGATGTCAAATACGCTGACATGGTGAGCAAGGGCGAGG
TaCOS1-p110-R4	TCGAGGGTACCCGGGGATCCCTACTTGTACAGCTCGTCC
TaDT1-A-CRI-F	ATGATGACCATGGATCTGA	for detecting knock out lines
TaDT1-A-CRI-R	GCCGAGACGCTGAACCCG
TaDT1-B-CRI-F	AATGGTGGTGGAAGGGGTAC
TaDT1-B-CRI-R	GCCGGTCCCATTCATTCA
TaDT1-D-CRI-F	CACCGCCTCGCTTCTTTTAT
TaDT1-D-CRI-R	GCCGCCTTCGAGCTGATT
TaATG8-A-CRI-F	AAGTTATCTATTTCGTGACG
TaATG8-A-CRI-R	CACAGCTTCCATAAGACGAGC
TaATG8-B-CRI-F	GTAAGCATCCGCCCTGG
TaATG8-B-CRI-R	CAGCCTCCATAAGACGAACC
TaATG18-A-CRI-F	AGGACTACGGCTGCTTCGCC
TaATG18-A-CRI-R	GGCAGACCAGCACAATGGAG
TaATG18-B-CRI-F	AGGACTACGGCTGCTTCGCG
TaATG18-B-CRI-R	CTCTGCAGCATTAAAGATCCTG
TaATG18-D-CRI-F	AGGACTACGGCTGCTTCGCG
TaATG18-D-CRI-R	CAATGAGCCTCCCATCCTGG
TaCOS1-A-CRI-F	CTTGACTCCTTAAAGGTCAGCAG
TaCOS1-A-CRI-R	CGTGTCCATGTTCTGATTCATAG
TaCOS1-B-CRI-F	ATCTGTTTGTTCAAGCTTGAGAG
TaCOS1-B-CRI-R	AGCAGATGTAAATAAACTTGGC
TaCOS1-D-CRI-F	CTGTAAATTATGACCTGAACC
TaCOS1-D-CRI-R	GATCGAAAGAGTACGCCAGCCTG
TaDT1-S1300GFP-F	TACACCAAATCGACTCTAGAATGATGACCATGGATCTGA	subcellular localization assay
TaDT1-S1300GFP-R	ATAGGTACCCGGGCTCTAGAGAGCTCCGGTAGCGGGGCG
TaMYC2-S1300GFP-F	TCAACCAAATCGACTCTAGAATGAACCTGTGGACGGACG
TaMYC2-S1300GFP-R	ATAGGTACCCGGGCTCTAGA TTACCGGATTTGCATCGCG
TaCOS1-S1300GFP-F	TCAACCAAATCGACTCTAGAATGATCCGACCAGGCTCCA	TaCOS1 subcellular localization and Co-IP activity assay
TaCOS1-S1300GFP-R	ATAGGTACCCGGGCTCTAGAGTCAGCGTATTTGACATCT
TaDT1-q-F	CCATGACCTTGGACTTCACC	RT-qPCR
TaDT1-q-R	CACCGTGCTGCACTTGTAGT
TaMYC2-q-F	GACAAGGAGACGCTCCACTC
TaMYC2-q-R	CGTGGTACACGTCCAGGTC
TaATG8-q-F	CGAGAGGGTGTCAGGACTTC
TaATG8-q-R	ACATCAGGGCCATAGGTACG
TaATG18-q-F	CTGGAGTGCCACAATTTCCT
TaATG18-q-R	TGCACAAGGCTTTCTTCCTT
TaCOS1-q-F	ATGCCTGGTTTCTTGATTGG
TaCOS1-q-R	TGCAACTAAATGAGCCCACA
TraesCS2A02G269600-q-F	ACAACCGTGAACCGTCTCTC
TraesCS2A02G269600-q-R	TATCTCGTCGGGTTCAGCTC
TraesCS2A02G269800-q-F	CGAATCTCGCTGAGGAAATC
TraesCS2A02G269800-q-R	CCCCTTCTCGATGTTTTCAA
TraesCS2A02G269300-q-F	GGGTTACATCCTAGCGGACA
TraesCS2A02G269300-q-R	GCCCACATAATGCACCTTCT
TraesCS2A02G269500-q-F	GCGAGAACCCACAGCTTATC
TraesCS2A02G269500-q-R	TCTCCCTCGTCGTTTAATGG
TraesCS2A02G269900-q-F	TGCTTGTGCAGTTCATAGGG
TraesCS2A02G269900-q-R	TTTGTGTTGTATCCGTGCAAA
TraesCS2A02G270000-q-F	ACCAAGCCTGCAACCATTAC
TraesCS2A02G270000-q-R	GTTGTGCAATGGGAGGTTCT
TraesCS2A02G269700-q-F	CTGTCTGCCCTGGGTAAGAT
TraesCS2A02G269700-q-R	ACACATGCAGACCAGCAAAA
TraesCS2A02G270100-q-F	CCGTCCATCGAAGATCAGTT
TraesCS2A02G270100-q-R	ACCTTTGCAATGTCGTTTCC
TraesCS2A02G270300-q-F	AATTGGGTGCTGAAAGATGG
TraesCS2A02G270300-q-R	GGGAACAAACAGGTGAGGAA
TraesCS2A02G269400-q-F	CTGCTCTGGCTTGGCTACTC
TraesCS2A02G269400-q-R	CACAGCCTCACAGCAGAAGA
TaGADPH-q-F	TTCAACATCATTCCAAGCAGC
TaGADPH-q-R	CGTAACCCAAAATGCCCTTG
TaACTIN-F	GGAATCCATGAGACCACCTAC
TaACTIN-R	GACCCAGACAACTCGCAAC
TaMYC2-S1300-F	TCAACCAAATCGACTCTAGAATGAACCTGTGGACGGACG	Transient dual luciferase reporter assay
TaMYC2-S1300-R	GGGAATTCGAGCTCGGTACCTTACCGGATTTGCATCGCG
TaDT1-S1300-F	TACACCAAATCGACTCTAGAATGATGACCATGGATCTGA
TaDT1-S1300-R	ATAGGTACCCGGGCTCTAGTCAGAGCTCCGGTAGCGGGGCG
TaCOS1-S1300-F	TACACCAAATCGACTCTAGAATGATCCGACCAGGCTCCA
TaCOS1-S1300-R	ATAGGTACCCGGGCTCTAGAGTCAGCGTATTTGACATCT
TaDT1-hapI/II-pGreen-F	TCCTGCAGCCCGGGGGATCCGAGCCAACGCGGGACTCACGAG
TaDT1-hapI/II-pGreen-R	GCTCTAGAACTAGTGGATCCGAAGAAGAAGTGAGGGAGACG
TaDT1-hapI/II818-pGreen-F	TCCTGCAGCCCGGGGGATCCTATGTATGTTACTAGTGTAAGTT
TaDT1-hapI/II818-pGreen-R	GCTCTAGAACTAGTGGATCCGAAGAAGAAGTGAGGGAGACG
TaDT1-mhapI-pGreen-F	TCCTGCAGCCCGGGGGATCCGAGCCAACGCGGGACTCACGAG
TaDT1-mhapI-pGreen-R	TGTTACTAGTCTATGTTAC
TaDT1-mhapII-pGreen-F	GGAAAAAAAAAAAAATTTTTCTATTTTACGAGTGGCACGGGCG
TaDT1-mhapII-pGreen-R	TCGTAAAATAGAAAAATTTTTTTTTTTTTCCTTTCATGAGAGGCA
TaATG8-pGreen-F	TCCTGCAGCCCGGGGGATCCCAAGCTCAGATGCACCCTT
TaATG8-pGreen-R	TCCTGCAGCCCGGGGGATCCTAAAGGGAGGAGGCCCCG
TaATG8-mut-pGreen-F	TTTTTTTCCCCCCCCTTCCACAGATGCCATTTCGG
TaATG8-mut-pGreen-R	AAGGGGGGGGAAAAAAATCGATGCTCAAAAAATGC
TaATG18-pGreen-F	TCCTGCAGCCCGGGGGATCCTCAATATTTTAGTCATGAC
TaATG18-pGreen-R	GCTCTAGAACTAGTGGATCCGGAGGGGGAGGCAAGGCAG
TaATG18-mut-pGreen-F	TGCAGTAGGGGGGGGGGGCACATGGAAGAGATTAAG
TaATG18-mut-pGreen-R	CCATGTGCCCCCCCCCCCTACTGCATGGGGGGTTGT
TaMYC2-AD-F	CCATGGAGGCCAGTGAATTCATGAACCTGTGGACGGACG	Y1H assay
TaMYC2-AD-R	AGCTCGAGCTCGATGGATCCTTACCGGATTTGCATCGCG
TaDT1-AbAi-F	TTGAATTCGAGCTCGGTACCACTCGGCGCGCTGCTCCTG
TaDT1-AbAi-R	TACAGAGCACATGCCTCGAGTGTTACTAGTCTATGTTAC
TaMYC2-6P-1-F	TCCAGGGGCCCCTGGGATCCATGAACCTGTGGACGGACG	EMSA assay
TaMYC2-6P-1-R	CCCGGGAATTCCGGGGATCCTTACCGGATTTGCATCGCG
TaDT1-Biotin-F	AAAGGAAAAAAACACGTGTTTTTCTATTTT
TaDT1-Biotin-R	AAAATAGAAAAACACGTGTTTTTTTCCTTT
TaDT1-Compet-F	AAAGGAAAAAAACACGTGTTTTTCTATTTT
TaDT1-Compet-R	AAAATAGAAAAACACGTGTTTTTTTCCTTT
TaDT1-mCompet-F	AAAGGAAAAAAAAAAAAATTTTTCTATTTT
TaDT1-mCompet-R	AAAATAGAAAAATTTTTTTTTTTTTCCTTT
TaATG8-Biotin-F	TCGATTTTTTTGTCATGACTTCCACAGATG
TaATG8-Biotin-R	CATCTGTGGAAGTCATGACAAAAAAATCGA
TaATG8-Compet-F	TCGATTTTTTTGTCATGACTTCCACAGATG
TaATG8-Compet-R	CATCTGTGGAAGTCATGACAAAAAAATCGA
TaATG8-mCompet-F	TCGATTTTTTTCCCCCCCCTTCCACAGATG
TaATG8-mCompet-R	CATCTGTGGAAGGGGGGGGAAAAAAATCGA
TaATG18-Biotin-F	CATGCAGTAGTGACAATGACCACATGGAAG
TaATG18-Biotin-R	CTTCCATGTGGTCATTGTCACTACTGCATG
TaATG18-Compet-F	CATGCAGTAGTGACAATGACCACATGGAAG
TaATG18-Compet-R	CTTCCATGTGGTCATTGTCACTACTGCATG
TaATG18-mCompet-F	CATGCAGTAGGGGGAAGGGGCACATGGAAG
TaATG18-mCompet-R	CTTCCATGTGCCCCTTCCCCCTACTGCATG
TaDT1-6P-1-F	TTCCAGGGGCCCCTGGGATCCATGATGACCATGGATCTG	EMSA and pull-down assay
TaDT1-6P-1-R	ACCCGGGAATTCCGGGGATCCTCAGAGCTCCGGTAGCGG
TaDT1-ChIP-P1-F	CGGAGCATGCTTACAAAACC	ChIP assay
TaDT1-ChIP-P1-R	AGACTGGGCACGACGTCTAT
TaDT1-ChIP-P2-F	GAGCTCAGTCGCTTGGATTT
TaDT1-ChIP-P2-R	CCCTGCGAAAGTCACAATTT
TaDT1-ChIP-P3-F	TGACCAGCCTAAGCATTTCC
TaDT1-ChIP-P3-R	GGGGAGTGACGAAAAGTCAA
TaDT1-ChIP-P4-F	TGACCAGCCTAAGCATTTCC
TaDT1-ChIP-P4-R	GGGGAGTGACGAAAAGTCAA
TaDT1-ChIP-P5-F	CCATGACCTTGGACTTCACC
TaDT1-ChIP-P5-R	CACCGTGCTGCACTTGTAGT
TaATG8-ChIP-P1-F	GTATGTCTGGTAAATTTCAGCTCG
TaATG8-ChIP-P1-R	GCAAAACCAACCATATGCAC
TaATG8-ChIP-P2-F	CTTTGTTGGCATTGTGCTGT
TaATG8-ChIP-P2-R	CTGCCTTTCATTGCCATTTT
TaATG8-ChIP-P3-F	AGAAGCCGCGCAAACAAG
TaATG8-ChIP-P3-R	GGAAGCGGAAACCAACTACC
TaATG8-ChIP-P4-F	CTGCTGTATTACGCGGGTTT
TaATG8-ChIP-P4-R	GCGTGCTTTGGTTTTAGCTC
TaATG18-ChIP-P1-F	GCCACAGTATCTGTTACGAGGT
TaATG18-ChIP-P1-R	AGCGGTCTAATGAGCTGGTC
TaATG18-ChIP-P2-F	GACCGCTACTAGAGCATTGGA
TaATG18-ChIP-P2-R	TTTCAGAACATGTTTTTCCTACCA
TaATG18-ChIP-P3-F	GGGAGACCAAGGTGTGGAAG
TaATG18-ChIP-P3-R	GAGGAGACCGAGGAGCTGT
TaATG18-ChIP-P4-F	CTGGCACCAGAAACGGTATT
TaATG18-ChIP-P4-R	GATGGACCACCAAAGAAGGA
TaCOS1-nLUC-F	TACGCGTCCCGGGGCGGTACCATGAATCCGACCAGGCTCC	LCI assay
TaCOS1-nLUC-R	TCCTTGTAGTCCATTTGTTGGTCAGCGTATTTGACATCT
TaDT1-cLUC-F	TACGCGTCCCGGGGCGGTACC ATGATGACCATGGATCTG
TaDT1-cLUC-R	TCCTTGTAGTCCATTTGTTG GAGCTCCGGTAGCGGGGCGAG
TaCOS1-cYFP-F	CAATTACAGGTACCCGGGGATCC ATGAATCCGACCAGGCTCC	BiFC assay
TaCOS1-cYFP-R	CTGCCACCGCCGTCGACTCTAGA GTCAGCGTATTTGACATCT
TaDT1-nYFP-F	CATCGAGGACGCCGGCGGATCCATGATGACCATGGATCTG
TaDT1-nYFP-R	GAAAGCTCTGCAGGTCGACTCTAGAGAGCTCCGGTAGCGGGGCGAG
TaCOS1-32α-F	GATATCGGATCCGAATTCATGAATCCGACCAGGCTCC	pull-down assay
TaCOS1-32α-R	GGCCGCAAGCTTGTCGACGTCAGCGTATTTGACATCT

## Sheet: Supplementary Table 10
Supplementary Table 10. Natural wheat accessions of varying ploidy used for haplotype analysis
Varieties	Classification	Haplotype
B040	Wild emmer	Hap I
GH418	Landrace	Hap I
GH407	Landrace	Hap I
GH376	Landrace	Hap I
GH372	Landrace	Hap I
GH371	Landrace	Hap I
GH318	Landrace	Hap I
GH316	Landrace	Hap I
GH315	Landrace	Hap I
GH314	Landrace	Hap I
GH313	Landrace	Hap I
GH312	Landrace	Hap I
GH308	Landrace	Hap I
GH307	Landrace	Hap I
GH300	Landrace	Hap I
GH298	Landrace	Hap I
GH287	Landrace	Hap I
GH286	Landrace	Hap I
GH251	Landrace	Hap I
GH174	Landrace	Hap I
GH173	Landrace	Hap I
GH170	Landrace	Hap I
GH167	Landrace	Hap I
GH159	Landrace	Hap I
GH158	Landrace	Hap I
GH154	Landrace	Hap I
GH144	Landrace	Hap I
GH143	Landrace	Hap I
GH142	Landrace	Hap I
GH141	Landrace	Hap I
GH140	Landrace	Hap I
GH139	Landrace	Hap I
GH138	Landrace	Hap I
GH137	Landrace	Hap I
GH136	Landrace	Hap I
GH135	Landrace	Hap I
B125	Durum wheat	Hap I
B124	Durum wheat	Hap I
B123	Durum wheat	Hap I
B122	Durum wheat	Hap I
B119	Durum wheat	Hap I
B118	Durum wheat	Hap I
B117	Durum wheat	Hap I
B116	Durum wheat	Hap I
B115	Durum wheat	Hap I
B114	Durum wheat	Hap I
B113	Durum wheat	Hap I
GT102	Durum wheat	Hap I
GT100	Durum wheat	Hap I
GT099	Durum wheat	Hap I
GT098	Durum wheat	Hap I
GT443	Durum wheat	Hap I
GT103	Durum wheat	Hap I
GT104	Durum wheat	Hap I
B090	Domesticated emmer	Hap I
B077	Domesticated emmer	Hap I
SY_Mattis	Cultivar	Hap I
Mace	Cultivar	Hap I
Lancer	Cultivar	Hap I
CDC_Stanley	Cultivar	Hap I
CDC_Landmark	Cultivar	Hap I
ArinaLandraceFor	Cultivar	Hap I
GH440	Cultivar	Hap I
GH438	Cultivar	Hap I
GH437	Cultivar	Hap I
GH436	Cultivar	Hap I
GH435	Cultivar	Hap I
GH434	Cultivar	Hap I
GH405	Cultivar	Hap I
GH404	Cultivar	Hap I
GH403	Cultivar	Hap I
GH402	Cultivar	Hap I
GH401	Cultivar	Hap I
GH400	Cultivar	Hap I
GH399	Cultivar	Hap I
GH398	Cultivar	Hap I
GH397	Cultivar	Hap I
GH394	Cultivar	Hap I
GH393	Cultivar	Hap I
GH392	Cultivar	Hap I
GH391	Cultivar	Hap I
GH389	Cultivar	Hap I
GH384	Cultivar	Hap I
GH383	Cultivar	Hap I
GH381	Cultivar	Hap I
GH380	Cultivar	Hap I
GH379	Cultivar	Hap I
GH378	Cultivar	Hap I
GH377	Cultivar	Hap I
GH323	Cultivar	Hap I
GH322	Cultivar	Hap I
GH321	Cultivar	Hap I
GH320	Cultivar	Hap I
GH319	Cultivar	Hap I
GH209	Cultivar	Hap I
GH208	Cultivar	Hap I
GH196	Cultivar	Hap I
GH191	Cultivar	Hap I
GH190	Cultivar	Hap I
GH188	Cultivar	Hap I
GH187	Cultivar	Hap I
GH185	Cultivar	Hap I
GH183	Cultivar	Hap I
GH179	Cultivar	Hap I
GH176	Cultivar	Hap I
GH175	Cultivar	Hap I
GH151	Cultivar	Hap I
GH150	Cultivar	Hap I
GH148	Cultivar	Hap I
GH147	Cultivar	Hap I
GH146	Cultivar	Hap I
GH145	Cultivar	Hap I
GT001	Wild emmer	Hap II
GT002	Wild emmer	Hap II
GT003	Wild emmer	Hap II
GT004	Wild emmer	Hap II
GT005	Wild emmer	Hap II
GT006	Wild emmer	Hap II
GT442	Wild emmer	Hap II
GT012	Wild emmer	Hap II
GT013	Wild emmer	Hap II
GT014	Wild emmer	Hap II
GT015	Wild emmer	Hap II
GT016	Wild emmer	Hap II
GT017	Wild emmer	Hap II
GT018	Wild emmer	Hap II
GT019	Wild emmer	Hap II
GT020	Wild emmer	Hap II
GT021	Wild emmer	Hap II
GT022	Wild emmer	Hap II
GT023	Wild emmer	Hap II
GT024	Wild emmer	Hap II
GT025	Wild emmer	Hap II
GT026	Wild emmer	Hap II
GT027	Wild emmer	Hap II
GT028	Wild emmer	Hap II
GT029	Wild emmer	Hap II
GT030	Wild emmer	Hap II
GT031	Wild emmer	Hap II
GT448	Wild emmer	Hap II
GT449	Wild emmer	Hap II
GT450	Wild emmer	Hap II
GT451	Wild emmer	Hap II
GT452	Wild emmer	Hap II
GT453	Wild emmer	Hap II
B023	Wild emmer	Hap II
B024	Wild emmer	Hap II
B025	Wild emmer	Hap II
B026	Wild emmer	Hap II
B027	Wild emmer	Hap II
B028	Wild emmer	Hap II
B029	Wild emmer	Hap II
B030	Wild emmer	Hap II
B031	Wild emmer	Hap II
B032	Wild emmer	Hap II
B033	Wild emmer	Hap II
B034	Wild emmer	Hap II
B035	Wild emmer	Hap II
B036	Wild emmer	Hap II
B037	Wild emmer	Hap II
B038	Wild emmer	Hap II
B039	Wild emmer	Hap II
B041	Wild emmer	Hap II
B042	Wild emmer	Hap II
B044	Wild emmer	Hap II
B045	Wild emmer	Hap II
B046	Wild emmer	Hap II
B047	Wild emmer	Hap II
B048	Wild emmer	Hap II
B049	Wild emmer	Hap II
B050	Wild emmer	Hap II
B052	Wild emmer	Hap II
GH444	Landrace	Hap II
GH445	Landrace	Hap II
GH446	Landrace	Hap II
GH134	Landrace	Hap II
GH155	Landrace	Hap II
GH157	Landrace	Hap II
GH160	Landrace	Hap II
GH161	Landrace	Hap II
GH162	Landrace	Hap II
GH163	Landrace	Hap II
GH164	Landrace	Hap II
GH168	Landrace	Hap II
GH169	Landrace	Hap II
GH171	Landrace	Hap II
GH172	Landrace	Hap II
GH197	Landrace	Hap II
GH202	Landrace	Hap II
GH203	Landrace	Hap II
GH204	Landrace	Hap II
GH205	Landrace	Hap II
GH206	Landrace	Hap II
GH207	Landrace	Hap II
GH211	Landrace	Hap II
GH217	Landrace	Hap II
GH238	Landrace	Hap II
GH239	Landrace	Hap II
GH243	Landrace	Hap II
GH249	Landrace	Hap II
GH250	Landrace	Hap II
GH252	Landrace	Hap II
GH253	Landrace	Hap II
GH254	Landrace	Hap II
GH255	Landrace	Hap II
GH264	Landrace	Hap II
GH266	Landrace	Hap II
GH275	Landrace	Hap II
GH276	Landrace	Hap II
GH278	Landrace	Hap II
GH279	Landrace	Hap II
GH280	Landrace	Hap II
GH281	Landrace	Hap II
GH282	Landrace	Hap II
GH283	Landrace	Hap II
GH284	Landrace	Hap II
GH285	Landrace	Hap II
GH288	Landrace	Hap II
GH289	Landrace	Hap II
GH290	Landrace	Hap II
GH291	Landrace	Hap II
GH292	Landrace	Hap II
GH293	Landrace	Hap II
GH294	Landrace	Hap II
GH295	Landrace	Hap II
GH296	Landrace	Hap II
GH297	Landrace	Hap II
GH299	Landrace	Hap II
GH301	Landrace	Hap II
GH302	Landrace	Hap II
GH303	Landrace	Hap II
GH304	Landrace	Hap II
GH305	Landrace	Hap II
GH306	Landrace	Hap II
GH309	Landrace	Hap II
GH310	Landrace	Hap II
GH311	Landrace	Hap II
GH317	Landrace	Hap II
GH329	Landrace	Hap II
GH343	Landrace	Hap II
GH352	Landrace	Hap II
GH353	Landrace	Hap II
GH354	Landrace	Hap II
GH355	Landrace	Hap II
GH356	Landrace	Hap II
GH357	Landrace	Hap II
GH358	Landrace	Hap II
GH359	Landrace	Hap II
GH360	Landrace	Hap II
GH361	Landrace	Hap II
GH362	Landrace	Hap II
GH363	Landrace	Hap II
GH364	Landrace	Hap II
GH365	Landrace	Hap II
GH366	Landrace	Hap II
GH367	Landrace	Hap II
GH368	Landrace	Hap II
GH369	Landrace	Hap II
GH370	Landrace	Hap II
GH373	Landrace	Hap II
GH374	Landrace	Hap II
GH375	Landrace	Hap II
GH406	Landrace	Hap II
GH408	Landrace	Hap II
GH412	Landrace	Hap II
GH415	Landrace	Hap II
GH416	Landrace	Hap II
GH417	Landrace	Hap II
GH419	Landrace	Hap II
GH420	Landrace	Hap II
GH441	Landrace	Hap II
TW025	Landrace	Hap II
TW026	Landrace	Hap II
TW027	Landrace	Hap II
TW028	Landrace	Hap II
TW029	Landrace	Hap II
GT105	Durum wheat	Hap II
GT101	Durum wheat	Hap II
B120	Durum wheat	Hap II
B121	Durum wheat	Hap II
GT007	Domesticated emmer	Hap II
GT008	Domesticated emmer	Hap II
GT009	Domesticated emmer	Hap II
GT010	Domesticated emmer	Hap II
GT011	Domesticated emmer	Hap II
B063	Domesticated emmer	Hap II
B064	Domesticated emmer	Hap II
B065	Domesticated emmer	Hap II
B066	Domesticated emmer	Hap II
B067	Domesticated emmer	Hap II
B068	Domesticated emmer	Hap II
B069	Domesticated emmer	Hap II
B070	Domesticated emmer	Hap II
B071	Domesticated emmer	Hap II
B072	Domesticated emmer	Hap II
B073	Domesticated emmer	Hap II
B074	Domesticated emmer	Hap II
B075	Domesticated emmer	Hap II
B076	Domesticated emmer	Hap II
B078	Domesticated emmer	Hap II
B079	Domesticated emmer	Hap II
B080	Domesticated emmer	Hap II
B081	Domesticated emmer	Hap II
B082	Domesticated emmer	Hap II
B083	Domesticated emmer	Hap II
B084	Domesticated emmer	Hap II
B085	Domesticated emmer	Hap II
B086	Domesticated emmer	Hap II
B087	Domesticated emmer	Hap II
B088	Domesticated emmer	Hap II
B089	Domesticated emmer	Hap II
B091	Domesticated emmer	Hap II
GH149	Cultivar	Hap II
GH152	Cultivar	Hap II
GH153	Cultivar	Hap II
GH156	Cultivar	Hap II
GH165	Cultivar	Hap II
GH166	Cultivar	Hap II
GH177	Cultivar	Hap II
GH178	Cultivar	Hap II
GH180	Cultivar	Hap II
GH181	Cultivar	Hap II
GH182	Cultivar	Hap II
GH184	Cultivar	Hap II
GH186	Cultivar	Hap II
GH189	Cultivar	Hap II
GH192	Cultivar	Hap II
GH193	Cultivar	Hap II
GH194	Cultivar	Hap II
GH195	Cultivar	Hap II
GH256	Cultivar	Hap II
GH257	Cultivar	Hap II
GH324	Cultivar	Hap II
GH382	Cultivar	Hap II
GH385	Cultivar	Hap II
GH386	Cultivar	Hap II
GH387	Cultivar	Hap II
GH388	Cultivar	Hap II
GH390	Cultivar	Hap II
GH395	Cultivar	Hap II
GH396	Cultivar	Hap II
GH439	Cultivar	Hap II
Jagger	Cultivar	Hap II
Norin61	Cultivar	Hap II
Spelt	Cultivar	Hap II
