# Supplementary material for: An elite allele TaDT1-AhapI enhances drought tolerance via mediating autophagic pathways in wheat
Source: Research Square preprint supplement (doi:10.21203/rs.3.rs-4746769/v1), 2024-08-07
Supplement: Supplementary file 2 [file c89c820d5bb9d43281e9ebae.xlsx]

## Sheet: Supplementary Data 1
Supplementary Data 1. 10756 DEGs generated from WT vs TaDT1-A KO plants under Drought conditions.
Gene ID	log2FC(dWT vs dKO)	P value(dWT vs dKO)
TraesCS6B02G091100	7.6885	5.77704e-10
TraesCS2D02G138400	7.00699	4.18565e-08
TraesCS5D02G488300	6.64791	3.43252e-07
TraesCS5D02G487900	6.12409	1.41689e-06
TraesCS1B02G019800	5.9626	1.76621e-05
TraesCS2B02G124800	5.94808	1.58106e-05
TraesCS7D02G439300	5.76667	1.02507e-05
TraesCS3A02G480400	5.76442	1.31876e-07
TraesCS6B02G074200	5.71369	0.000111981
TraesCS2A02G578200	5.56734	0.000123369
TraesCS7D02G256000	5.48579	0.000313515
TraesCSU02G263300	5.47751	0.000167822
TraesCS3D02G475200	5.42028	6.13635e-12
TraesCS2A02G570500	5.41797	0.000269709
TraesCS3B02G526000	5.3528	0.000331452
TraesCS5D02G080200	5.33622	6.18243e-05
TraesCS5A02G411700	5.31266	0.00034866
TraesCSU02G031600	5.30485	2.61697e-06
TraesCS2D02G518200	5.2417	0.000518648
TraesCS6A02G005100	5.21846	0.000569728
TraesCS2D02G568300	5.18425	0.000568507
TraesCS3B02G565600	5.16894	0.000593887
TraesCS6B02G037600	5.14082	0.000774746
TraesCS1B02G320300	5.1171	0.000199366
TraesCS3A02G383900	5.10494	0.000162254
TraesCSU02G265700	5.0496	1.41449e-05
TraesCS6B02G425200	5.04923	0.000983664
TraesCS4D02G015600	5.03951	4.39058e-10
TraesCS7D02G161200	5.03468	3.58257e-31
TraesCS3D02G057400	5.0328	0.000991407
TraesCS7D02G119100	4.99396	0.00188564
TraesCS1A02G297700	4.93906	0.00150945
TraesCS2A02G272300	4.90876	0.00245551
TraesCS5B02G541100	4.87821	0.00176907
TraesCS2D02G049200	4.84838	0.00239027
TraesCS5B02G209000	4.83147	0.000478421
TraesCS5B02G415400	4.82538	0.00087179
TraesCS7D02G551400	4.81924	5.31705e-41
TraesCSU02G269900	4.81429	4.06216e-05
TraesCS5D02G488400	4.8034	0.0025632
TraesCS3D02G517800	4.78933	6.85432e-11
TraesCS5A02G183300	4.77906	5.90662e-20
TraesCS7B02G354400	4.76386	0.00316718
TraesCS6A02G058300	4.74201	0.00449495
TraesCSU02G023100	4.74012	0.00450199
TraesCS4D02G265200	4.7011	0.00468327
TraesCS6B02G234800	4.62972	2.59806e-06
TraesCS5B02G181500	4.60394	6.00294e-39
TraesCSU02G264900	4.58204	1.23541e-07
TraesCS3A02G489500	4.57655	0.00124384
TraesCS1B02G123900	4.56888	0.0059624
TraesCS7A02G558500	4.50184	1.00821e-18
TraesCS3D02G518800	4.49773	0.00189853
TraesCSU02G270800	4.47779	6.14983e-06
TraesCS1D02G052500	4.45701	0.00192963
TraesCS1A02G001300	4.41692	1.32386e-08
TraesCSU02G253400	4.4168	0.000463822
TraesCSU02G173800	4.39949	7.96151e-09
TraesCS1A02G355300	4.38821	6.21461e-09
TraesCSU02G258200	4.37928	1.0215e-08
TraesCS4A02G031400	4.35753	0.00294125
TraesCS6B02G473800	4.34119	0.000381401
TraesCS5A02G555600	4.32909	9.10743e-09
TraesCSU02G269400	4.27997	0.00399872
TraesCS5D02G345900	4.27455	0.000374711
TraesCS1A02G000800	4.23362	2.1604e-13
TraesCSU02G146600	4.19011	2.53146e-05
TraesCS7A02G198800	4.16598	0.00518337
TraesCSU02G267700	4.14461	0.000649503
TraesCS5D02G023700	4.11662	8.00303e-18
TraesCS2D02G484200	4.11188	2.15786e-11
TraesCS5D02G488900	4.11076	1.81005e-07
TraesCS6B02G250500	4.10233	3.66639e-05
TraesCS4D02G032000	4.06248	1.3299e-35
TraesCS5B02G485200	4.06132	0.00117304
TraesCS3B02G525000	4.00035	7.86633e-05
TraesCSU02G249800	3.97819	3.9601e-14
TraesCS3B02G493100	3.96649	0.00207431
TraesCS1D02G181100	3.8687	2.41147e-07
TraesCS1A02G001000	3.85184	1.77946e-22
TraesCSU02G260600	3.82384	2.28104e-05
TraesCS3B02G185500	3.8054	2.71081e-06
TraesCS3D02G272200	3.77385	6.50847e-44
TraesCSU02G263900	3.76907	7.96829e-10
TraesCSU02G258900	3.76253	3.88371e-22
TraesCSU02G271300	3.73548	5.18494e-07
TraesCS5D02G488800	3.73348	4.96689e-05
TraesCS7B02G049500	3.72484	0.00329971
TraesCS4A02G498000	3.71765	4.80389e-15
TraesCS2A02G509100	3.68576	0.00401136
TraesCS5D02G025300	3.67283	8.46444e-06
TraesCSU02G075700	3.65862	7.38679e-08
TraesCSU02G263200	3.6488	0.00079546
TraesCS4A02G279300	3.62536	8.03228e-11
TraesCSU02G265400	3.61456	8.98162e-05
TraesCS1A02G001200	3.56973	0.000926535
TraesCS7D02G255400	3.56932	3.71402e-05
TraesCS2B02G487300	3.54401	4.05754e-29
TraesCS5A02G555700	3.53831	0.00108116
TraesCS1B02G087000	3.51405	1.32624e-16
TraesCS1A02G358100	3.51198	2.56707e-08
TraesCS7D02G119300	3.501	3.60654e-05
TraesCS4B02G377100	3.49515	1.05736e-13
TraesCS1A02G000900	3.48171	7.05712e-12
TraesCSU02G256700	3.47662	1.43238e-15
TraesCSU02G262400	3.42859	6.65027e-12
TraesCS4D02G031700	3.41594	4.48382e-92
TraesCS5D02G050200	3.4122	2.81061e-12
TraesCS1A02G000700	3.40696	1.02948e-05
TraesCS1A02G000200	3.40632	1.56249e-12
TraesCSU02G056800	3.40602	0.00268232
TraesCS1A02G000400	3.37531	5.69132e-16
TraesCS6A02G225400	3.37011	0.000368368
TraesCSU02G248500	3.35614	8.58067e-09
TraesCSU02G260700	3.35071	1.22419e-16
TraesCS5D02G484900	3.34503	2.68448e-06
TraesCS7D02G463700	3.33352	9.65248e-07
TraesCS1A02G001100	3.33256	8.6644e-20
TraesCSU02G269600	3.327	2.50337e-21
TraesCS4A02G244700	3.30924	0.000202461
TraesCS5D02G023800	3.30217	3.60745e-18
TraesCS6B02G117900	3.30069	5.00807e-11
TraesCSU02G265800	3.29621	0.000815083
TraesCS4D02G031800	3.29402	2.44359e-47
TraesCS4D02G031900	3.2864	5.72427e-58
TraesCSU02G263100	3.27786	1.27381e-13
TraesCS5A02G555500	3.27663	9.85732e-17
TraesCSU02G242000	3.26979	1.9039e-08
TraesCS4D02G229600	3.26899	5.26611e-07
TraesCS1A02G001500	3.25944	1.6505e-06
TraesCS7A02G103600	3.25937	0.00333374
TraesCS3D02G520200	3.20779	2.99848e-07
TraesCSU02G269800	3.2024	0.00494397
TraesCSU02G145700	3.19799	3.5933e-10
TraesCS7A02G059500	3.1951	0.00125208
TraesCS1A02G000500	3.18525	9.09387e-14
TraesCS7D02G464000	3.14319	0.0031671
TraesCS5D02G488500	3.13139	6.26947e-08
TraesCS6B02G256200	3.10514	0.000491842
TraesCS7D02G119200	3.10046	1.31472e-10
TraesCS5D02G457400	3.09363	3.07155e-15
TraesCS4B02G377200	3.09032	7.72148e-05
TraesCS5B02G429900	3.08867	3.36886e-14
TraesCS1A02G339200	3.08332	0.00180321
TraesCS1A02G000300	3.08327	0.000255568
TraesCS1A02G001400	3.07415	6.64309e-13
TraesCS4D02G030700	3.06413	8.09722e-35
TraesCS4A02G244900	3.04989	1.2836e-15
TraesCSU02G271600	3.03727	0.0004042
TraesCS6D02G091800	3.03715	0.00296006
TraesCS5A02G004700	3.03181	6.1166e-37
TraesCS5A02G004600	3.02811	0.000730063
TraesCS2B02G487400	3.02776	1.02419e-08
TraesCS1A02G282400	3.01623	5.68844e-07
TraesCS7A02G198900	3.00696	1.26282e-12
TraesCS6A02G009800	2.99798	0.000637171
TraesCSU02G075600	2.97943	0.00298921
TraesCSU02G262100	2.96768	3.13484e-06
TraesCS3A02G272800	2.96265	0.00302478
TraesCS5D02G010900	2.95134	5.16763e-06
TraesCS6D02G139500	2.95036	0.00383604
TraesCS5B02G535400	2.91029	2.48137e-05
TraesCS4D02G229500	2.9053	0.00130525
TraesCSU02G247700	2.90132	0.00152823
TraesCS6B02G117700	2.88022	2.21335e-05
TraesCS7D02G159500	2.87161	0.0067066
TraesCS5D02G012000	2.86343	3.36898e-35
TraesCS2D02G244000	2.82602	0.00558708
TraesCS4B02G033100	2.8158	2.06653e-65
TraesCS2B02G442700	2.77057	1.60245e-10
TraesCS1A02G377000	2.76632	0.00355313
TraesCS7D02G119000	2.76478	2.82024e-05
TraesCS2B02G585600	2.76182	0.00329544
TraesCS4A02G279200	2.75382	9.33908e-06
TraesCS2D02G552100	2.72702	1.0973e-37
TraesCS2A02G532600	2.72225	0.000206086
TraesCS3A02G483000	2.72004	6.95464e-12
TraesCS5A02G494400	2.7093	0.00345333
TraesCSU02G271400	2.70426	0.000183718
TraesCS1D02G087700	2.70358	0.00218442
TraesCS5A02G544400	2.70172	0.000121668
TraesCS4A02G245000	2.69692	0.00448002
TraesCS1A02G000100	2.67153	0.000276883
TraesCS3A02G481500	2.66955	1.91353e-08
TraesCS5A02G004800	2.66924	4.21828e-07
TraesCS1D02G182600	2.66558	3.49577e-05
TraesCS7B02G105100	2.66387	4.38093e-19
TraesCS2D02G101200	2.66141	0.00060223
TraesCS4B02G033300	2.65954	5.70312e-34
TraesCS5D02G011800	2.65903	2.79859e-07
TraesCSU02G265300	2.65408	2.60904e-05
TraesCS7A02G386800	2.65273	5.60924e-45
TraesCS6A02G162900	2.63268	1.15692e-06
TraesCSU02G266300	2.61506	0.000176442
TraesCS4D02G032100	2.60185	1.09566e-05
TraesCS7A02G075600	2.59361	2.21137e-06
TraesCS5D02G436000	2.58835	1.81925e-32
TraesCS7D02G526600	2.58716	0.00204083
TraesCS5B02G403700	2.5842	1.90803e-33
TraesCS4B02G033600	2.57689	6.17765e-11
TraesCS5D02G002900	2.57593	0.00138343
TraesCS1D02G362900	2.56154	0.000433903
TraesCS3D02G077400	2.5494	9.90717e-08
TraesCS1A02G384800	2.53543	6.28665e-05
TraesCSU02G266700	2.50915	0.0012396
TraesCS7D02G494100	2.5054	2.6861e-16
TraesCS4A02G181900	2.50046	2.65808e-14
TraesCS6A02G015500	2.49965	1.58409e-11
TraesCS7B02G215300	2.49112	4.76917e-05
TraesCS7D02G339000	2.48877	0.000144283
TraesCS2B02G355900	2.48646	0.000343499
TraesCS3D02G477300	2.47244	0.00341793
TraesCS4A02G296300	2.45601	2.26835e-33
TraesCS1A02G405800	2.4539	0.00191176
TraesCS2A02G547200	2.45223	0.000726791
TraesCSU02G222000	2.44405	0.000276078
TraesCS1D02G355100	2.42363	1.11444e-11
TraesCS5B02G366900	2.41981	0.00234827
TraesCS4A02G400600	2.38635	1.23722e-17
TraesCSU02G128500	2.37629	0.00670634
TraesCS3D02G146000	2.37395	0.00295821
TraesCS3A02G260100	2.37195	4.57826e-32
TraesCS3A02G033000	2.36776	0.00245024
TraesCS6A02G178900	2.36604	0.0010857
TraesCS3D02G067200	2.36503	0.000343364
TraesCSU02G261800	2.36272	0.00112596
TraesCS6B02G170000	2.34031	0.000301991
TraesCS6B02G196600	2.33966	0.000500874
TraesCS1D02G207100	2.3333	7.55678e-23
TraesCS6B02G022500	2.31884	3.25008e-16
TraesCS3B02G526700	2.31818	0.000150781
TraesCS6B02G283800	2.29288	2.54095e-07
TraesCS3A02G482200	2.29064	1.04919e-23
TraesCS4D02G031600	2.29004	1.01983e-30
TraesCS1A02G200400	2.28512	0.000133037
TraesCS3A02G435200	2.28226	2.67799e-08
TraesCS7B02G104900	2.26034	2.74532e-07
TraesCS3D02G524700	2.25521	1.01659e-65
TraesCS3D02G500800	2.25476	9.72763e-09
TraesCS4B02G377400	2.2547	0.000210799
TraesCS6B02G355700	2.24048	1.78714e-11
TraesCS2A02G484200	2.23063	8.18968e-06
TraesCS6B02G188300	2.22998	0.00478515
TraesCS2D02G139100	2.22462	1.03795e-23
TraesCS3D02G480100	2.22302	0.00384755
TraesCS5B02G068100	2.19973	0.000295532
TraesCS5B02G425600	2.19743	1.44218e-08
TraesCSU02G051900	2.19231	8.1411e-05
TraesCS6B02G122300	2.15946	0.000704915
TraesCS1A02G395100	2.14888	2.65438e-25
TraesCS3B02G282500	2.1425	2.5837e-46
TraesCS7D02G089800	2.13845	3.67503e-07
TraesCS3B02G282400	2.13543	8.2492e-22
TraesCS1A02G312700	2.13002	2.37053e-19
TraesCS7B02G455700	2.12246	0.000399472
TraesCS1A02G234600	2.11738	1.77124e-144
TraesCS1D02G363300	2.11722	4.69645e-07
TraesCS3A02G009300	2.11624	0.000312829
TraesCS1D02G179900	2.10901	4.69544e-08
TraesCS7B02G321300	2.10392	0.00572623
TraesCS7A02G528700	2.09841	1.15204e-37
TraesCS5B02G210200	2.09814	0.000861589
TraesCS2D02G006500	2.09234	3.23945e-49
TraesCS2B02G159800	2.08425	0.000243031
TraesCS7A02G101900	2.08422	3.0898e-05
TraesCS6B02G297600	2.08127	0.000748268
TraesCS4D02G318700	2.07336	1.22001e-05
TraesCS2B02G627900	2.07216	0.00421005
TraesCS7D02G119400	2.06631	0.00285566
TraesCS4D02G176200	2.0635	0.0012564
TraesCS7A02G055800	2.06145	1.36867e-13
TraesCS2A02G177200	2.05668	0.000133542
TraesCS7D02G516700	2.04946	1.24001e-34
TraesCS1A02G426700	2.04808	1.20287e-14
TraesCS2D02G081000	2.04694	0.000845823
TraesCS4A02G439000	2.04664	0.000119228
TraesCS6A02G002900	2.04396	9.70292e-05
TraesCS4B02G377000	2.03261	0.00189539
TraesCS1A02G349900	2.0322	3.16877e-62
TraesCS3B02G359800	2.02757	2.92523e-05
TraesCS1A02G250000	2.0195	2.31322e-12
TraesCS2D02G364500	2.01896	0.00047137
TraesCS7A02G528800	2.0186	9.39501e-17
TraesCS3A02G483100	2.01726	3.3918e-08
TraesCS7D02G412900	2.01318	1.13649e-05
TraesCS3D02G305500	2.00801	0.00350944
TraesCS6A02G369800	2.00394	4.64364e-05
TraesCS1A02G299200	1.99759	4.00299e-11
TraesCS4A02G328500	1.98956	0.00165974
TraesCS5D02G049200	1.98231	4.23306e-14
TraesCS1A02G442100	1.97983	0.000533226
TraesCS4D02G273300	1.9791	0.00173286
TraesCS5D02G268600	1.97821	4.41256e-07
TraesCS6A02G403200	1.95188	1.85827e-06
TraesCS1A02G352500	1.95166	5.07108e-05
TraesCS1A02G341200	1.95147	5.51635e-22
TraesCS3D02G390700	1.94598	6.48592e-06
TraesCS7B02G378300	1.94452	0.00258775
TraesCS2B02G360300	1.94089	6.22268e-09
TraesCS5B02G063600	1.93933	0.00524131
TraesCS3A02G392800	1.9367	3.11253e-08
TraesCS3D02G102300	1.93441	1.47764e-18
TraesCS7D02G516900	1.93421	9.37761e-38
TraesCS3A02G233600	1.9335	2.61329e-08
TraesCS3D02G055000	1.93198	0.00370816
TraesCS4D02G032200	1.9224	1.76281e-16
TraesCS3A02G199200	1.918	7.4874e-29
TraesCS5A02G460500	1.91282	4.69566e-17
TraesCS5A02G432600	1.91006	0.00650882
TraesCS3A02G517100	1.90941	3.17922e-43
TraesCS3B02G533800	1.90826	0.00198627
TraesCS4B02G297300	1.89852	1.6257e-11
TraesCS1D02G376500	1.89668	0.00318498
TraesCS6B02G304000	1.8958	2.33335e-14
TraesCS3B02G091400	1.89483	0.000559255
TraesCS7D02G516800	1.89147	3.96427e-19
TraesCS2D02G264400	1.88631	0.00418258
TraesCS2D02G219800	1.88627	1.25014e-10
TraesCS7B02G283000	1.87838	3.20835e-07
TraesCS1A02G203600	1.87516	3.93548e-30
TraesCS1A02G273800	1.87425	0.000771033
TraesCS6A02G024300	1.87204	0.000680058
TraesCS6D02G302600	1.87126	0.00589286
TraesCS4B02G033400	1.86877	0.00225436
TraesCS1D02G207000	1.86475	1.75399e-08
TraesCS1A02G333200	1.86274	0.000140287
TraesCS2A02G566200	1.86059	5.89374e-10
TraesCS4A02G471500	1.85914	0.00143018
TraesCS7B02G205600	1.85913	1.94492e-05
TraesCS7D02G201400	1.85171	8.04747e-36
TraesCS3A02G260200	1.85063	2.0763e-52
TraesCS1D02G284900	1.84816	0.00520377
TraesCS2A02G110200	1.84712	0.000879989
TraesCS5D02G559700	1.84406	0.000295986
TraesCS1A02G369800	1.83805	5.29781e-84
TraesCS1A02G351000	1.83507	2.44857e-11
TraesCS1A02G393700	1.83423	0.00430521
TraesCS1A02G308700	1.82728	0.000380416
TraesCSU02G269500	1.82197	3.27402e-07
TraesCS7B02G357300	1.82168	0.00179599
TraesCS1B02G087800	1.82157	0.00580167
TraesCS2D02G478400	1.81583	0.002039
TraesCS5A02G118900	1.81515	6.47632e-105
TraesCS5D02G008300	1.81139	1.56006e-14
TraesCS3B02G185900	1.80945	2.4747e-06
TraesCS1A02G414000	1.80786	1.21154e-15
TraesCS3A02G288800	1.79885	1.45801e-07
TraesCS5D02G012300	1.79337	1.6574e-06
TraesCS5D02G545300	1.79325	1.32097e-08
TraesCS5B02G532400	1.79289	0.000607614
TraesCS3B02G293200	1.79146	1.09164e-40
TraesCS1A02G265200	1.7899	8.78283e-22
TraesCS1A02G285400	1.78707	4.87547e-26
TraesCS1A02G401200	1.78289	4.77865e-08
TraesCS1A02G329600	1.77643	6.63469e-56
TraesCS3D02G478000	1.7744	4.06813e-07
TraesCS2D02G360900	1.76471	5.73795e-07
TraesCS1A02G253400	1.75625	1.36509e-73
TraesCS1A02G248000	1.75431	4.44218e-05
TraesCS3A02G477300	1.75423	0.00147554
TraesCS7B02G157600	1.75145	1.25913e-05
TraesCS1A02G388800	1.74793	0.000129745
TraesCS3A02G402000	1.74739	3.64717e-08
TraesCS1A02G203700	1.74652	2.35163e-22
TraesCS3B02G313400	1.74241	4.24879e-15
TraesCS3D02G260500	1.74051	2.81865e-25
TraesCS1B02G234700	1.73808	4.16026e-08
TraesCS3D02G326200	1.73616	0.000101194
TraesCS1A02G360400	1.73153	2.96989e-17
TraesCS3D02G260300	1.7303	1.59796e-51
TraesCS1A02G424100	1.72817	1.33825e-79
TraesCS5A02G004900	1.72579	0.00135203
TraesCS5A02G489900	1.72307	0.0002074
TraesCS3D02G120200	1.72102	4.22707e-05
TraesCS3D02G149300	1.71678	2.84171e-07
TraesCS5B02G126800	1.70944	0.00202457
TraesCS1D02G292000	1.70644	1.20489e-06
TraesCS3D02G067100	1.70522	5.81619e-05
TraesCS3B02G598200	1.70237	1.11741e-13
TraesCS7A02G428800	1.69813	3.95793e-10
TraesCS4B02G013100	1.69782	3.45793e-12
TraesCS3D02G515400	1.69496	2.42794e-10
TraesCS2D02G268600	1.69346	0.00513039
TraesCS6D02G057800	1.68776	1.40816e-14
TraesCS3B02G563800	1.68724	0.00130248
TraesCS1A02G364700	1.68537	3.01068e-07
TraesCS1A02G361000	1.68346	5.29253e-40
TraesCS3D02G496800	1.68136	0.00566823
TraesCS7B02G413400	1.68068	1.59558e-10
TraesCS1A02G362100	1.67962	5.48101e-25
TraesCS5D02G408200	1.67751	7.26104e-44
TraesCS3D02G228400	1.67347	1.30336e-32
TraesCS3D02G243900	1.66897	0.00411774
TraesCS1A02G354500	1.66891	5.85655e-06
TraesCS6A02G240900	1.6684	0.000690795
TraesCS2B02G582100	1.66827	2.20856e-13
TraesCS1A02G387400	1.66576	1.9042e-12
TraesCS1B02G022400	1.66565	4.66795e-05
TraesCS1A02G444000	1.66015	8.12773e-05
TraesCS2A02G534400	1.65264	0.000990325
TraesCS1D02G096400	1.65036	3.09189e-28
TraesCS7D02G494000	1.64852	6.47095e-93
TraesCS2A02G578000	1.64256	0.00419309
TraesCS5D02G452500	1.63759	5.44238e-08
TraesCS7A02G521500	1.63393	7.70642e-06
TraesCS5B02G124600	1.63242	0.00268257
TraesCS5A02G128000	1.63001	0.00410681
TraesCS6B02G261000	1.62917	9.1312e-12
TraesCS6A02G310300	1.62501	1.82155e-06
TraesCS3D02G084400	1.6239	8.32199e-11
TraesCS1A02G269400	1.61896	7.05486e-05
TraesCS1B02G149900	1.61423	3.76278e-05
TraesCS6D02G149300	1.61272	8.18513e-14
TraesCS1A02G442300	1.61133	6.51569e-09
TraesCS7B02G396000	1.60967	6.23938e-06
TraesCS1D02G190100	1.60871	4.45307e-06
TraesCS6B02G406300	1.60822	6.01747e-45
TraesCS7D02G201300	1.60815	7.91683e-08
TraesCS7D02G095900	1.60611	1.19138e-16
TraesCS6D02G157600	1.60578	0.000974605
TraesCS4B02G178500	1.60394	1.33351e-05
TraesCS5D02G472200	1.60238	3.5009e-24
TraesCS4D02G116000	1.60207	0.00403906
TraesCS6D02G237100	1.60173	0.000914451
TraesCS1A02G276200	1.60147	0.000406466
TraesCS6A02G174600	1.59938	0.00125864
TraesCS1A02G323800	1.59622	0.00351483
TraesCS3A02G078400	1.59595	4.64104e-07
TraesCS2A02G098700	1.59262	1.52778e-05
TraesCS6B02G201500	1.59234	1.869e-31
TraesCS5B02G413300	1.58854	0.00014733
TraesCS2D02G198000	1.58694	1.51157e-06
TraesCS2D02G255500	1.58495	0.00524876
TraesCS1A02G335100	1.58189	0.000221524
TraesCS5A02G145600	1.58056	1.7346e-12
TraesCS3D02G127500	1.57835	0.00547912
TraesCS5B02G546200	1.57532	0.000991435
TraesCS1A02G254000	1.57275	4.1879e-06
TraesCS5A02G074200	1.56816	0.000584794
TraesCS3B02G306400	1.56414	1.75395e-09
TraesCS1A02G358000	1.56372	1.34856e-09
TraesCS1A02G235800	1.56322	0.00558974
TraesCS3B02G389400	1.56314	1.58174e-20
TraesCS3D02G483000	1.55835	1.32699e-07
TraesCS3D02G501700	1.55821	7.45244e-12
TraesCS2D02G430800	1.55694	8.90656e-08
TraesCS2D02G364600	1.55394	0.00152264
TraesCS2D02G028900	1.55177	0.00595275
TraesCS7D02G247600	1.55144	0.00253243
TraesCS2D02G121400	1.55066	0.000405299
TraesCS6A02G028800	1.5491	0.00231331
TraesCS7A02G236200	1.54841	1.77952e-11
TraesCS7A02G350500	1.54719	2.72837e-11
TraesCS3B02G093300	1.54344	2.92155e-28
TraesCS7D02G490800	1.54242	4.4597e-17
TraesCS5D02G419300	1.54075	0.000415679
TraesCS4A02G340700	1.53952	0.000279871
TraesCS1B02G436800	1.5374	6.78783e-07
TraesCSU02G009000	1.53595	0.004037
TraesCS3A02G309000	1.53317	4.02421e-25
TraesCS3B02G080700	1.53174	0.00376815
TraesCS1A02G435000	1.53134	1.46833e-10
TraesCS7A02G528900	1.53097	3.45613e-08
TraesCS1A02G390500	1.5293	1.26936e-09
TraesCS2B02G395200	1.52381	1.98294e-05
TraesCS2D02G311100	1.52339	0.000374654
TraesCS1A02G332400	1.5211	0.00205701
TraesCS3B02G575400	1.51978	0.000127031
TraesCS5B02G566000	1.5197	2.17186e-05
TraesCS2A02G569300	1.51783	1.62519e-10
TraesCS3B02G578500	1.51716	0.00233341
TraesCS3D02G133100	1.51652	5.03887e-18
TraesCS1A02G239000	1.51341	1.25319e-26
TraesCS1A02G400700	1.51279	6.95051e-06
TraesCS1A02G186600	1.51241	2.84805e-05
TraesCS2A02G566000	1.50987	0.000165344
TraesCS5B02G525000	1.50661	0.000398582
TraesCS5D02G087900	1.50618	2.36228e-12
TraesCS1A02G375800	1.50524	5.54472e-33
TraesCS2D02G436200	1.50519	5.13053e-13
TraesCS1B02G466200	1.50304	2.88934e-08
TraesCS3A02G133400	1.50222	7.68768e-06
TraesCS6B02G192400	1.49879	1.20809e-39
TraesCS1A02G420900	1.4981	2.72686e-27
TraesCS7A02G259600	1.49788	0.00212268
TraesCS1A02G261400	1.49713	5.49924e-28
TraesCS1A02G250100	1.49637	7.44795e-05
TraesCS5D02G559400	1.49567	2.4491e-06
TraesCS3B02G254700	1.49442	4.67515e-13
TraesCS3A02G265100	1.49376	0.000401135
TraesCS4A02G126400	1.49359	0.000944329
TraesCS2D02G502300	1.49274	0.00200048
TraesCS1A02G329500	1.49108	2.00918e-11
TraesCS1D02G352600	1.48908	1.60849e-42
TraesCS1B02G115900	1.48774	1.09874e-35
TraesCS7B02G010700	1.48736	0.000224566
TraesCS1D02G122400	1.48554	0.000835642
TraesCS1B02G370800	1.4834	0.000498058
TraesCS7B02G042000	1.4815	0.00105475
TraesCS3A02G279800	1.48061	7.08528e-40
TraesCS2A02G119600	1.47834	3.14052e-05
TraesCS7B02G060500	1.4773	0.000800356
TraesCS6B02G022400	1.47613	5.48067e-14
TraesCS2B02G182800	1.47571	1.60345e-71
TraesCS2A02G312600	1.47432	5.11641e-12
TraesCS4A02G043800	1.4738	3.83852e-12
TraesCS5B02G017300	1.47306	0.000613812
TraesCS6D02G255200	1.47298	9.06532e-19
TraesCS1A02G262100	1.47279	1.29136e-10
TraesCS3B02G189000	1.4708	0.00013178
TraesCS7B02G443100	1.46772	0.002266
TraesCS1D02G440500	1.4616	0.00621481
TraesCS7D02G269400	1.46003	1.33532e-09
TraesCSU02G259600	1.45811	9.65746e-05
TraesCS1A02G424800	1.45631	0.000221599
TraesCS5A02G463500	1.45515	0.00287028
TraesCS7A02G456600	1.45194	5.29124e-10
TraesCS2D02G374600	1.44796	0.000578886
TraesCS1A02G328100	1.44738	0.000194501
TraesCS2A02G455600	1.44541	0.00147324
TraesCS2D02G075000	1.44355	1.65523e-07
TraesCS3D02G127800	1.44224	5.96029e-05
TraesCS3D02G542600	1.44154	2.04234e-05
TraesCS1A02G246700	1.44078	0.000293808
TraesCS1A02G263600	1.43986	2.6881e-23
TraesCS1A02G321700	1.43844	0.000197565
TraesCS5B02G291100	1.43741	4.02649e-07
TraesCS7A02G172900	1.43693	0.00110366
TraesCS4A02G007600	1.4357	1.55974e-08
TraesCS6B02G340300	1.43457	0.00032909
TraesCS6B02G063900	1.43368	5.50077e-38
TraesCS6D02G316600	1.43171	7.27292e-31
TraesCS3B02G118300	1.43049	1.40466e-08
TraesCS1B02G260700	1.42829	0.00510056
TraesCS2D02G069100	1.42632	1.90177e-11
TraesCS3D02G350700	1.42612	1.41667e-10
TraesCS4B02G055400	1.42563	8.6245e-10
TraesCS1A02G300000	1.42218	7.04063e-40
TraesCS4A02G129800	1.42048	1.86876e-06
TraesCS2A02G005100	1.41968	8.3141e-15
TraesCS1A02G313300	1.41751	3.54008e-95
TraesCS2A02G315600	1.41657	5.6747e-07
TraesCS3D02G091900	1.4163	7.47628e-12
TraesCS7D02G206100	1.41538	2.0349e-05
TraesCS4D02G176700	1.41522	9.96132e-10
TraesCS6D02G013600	1.41496	0.00142238
TraesCS1D02G353800	1.41329	8.57691e-05
TraesCS7D02G383300	1.41102	5.38823e-43
TraesCS6B02G063400	1.40938	0.00204203
TraesCS3A02G425700	1.40925	0.000931943
TraesCS1A02G275200	1.40921	6.7931e-56
TraesCS7A02G506100	1.40902	8.94186e-26
TraesCS2A02G510800	1.40876	1.34357e-05
TraesCS1B02G020600	1.40814	8.49516e-06
TraesCS1A02G304200	1.40593	1.3179e-08
TraesCS1B02G466900	1.40574	0.00471766
TraesCS1A02G322100	1.40335	7.50671e-05
TraesCS2B02G614100	1.40278	0.000108625
TraesCS2A02G438200	1.40069	3.92447e-32
TraesCS3D02G495700	1.39888	0.000284843
TraesCS7D02G077300	1.39551	1.64247e-10
TraesCS6D02G033000	1.39383	0.00174959
TraesCS1A02G298800	1.392	1.87659e-29
TraesCS5B02G268700	1.39149	0.00176836
TraesCS5B02G470300	1.38888	0.000123954
TraesCS2A02G114600	1.38885	1.57331e-15
TraesCS1A02G443700	1.38781	0.00010984
TraesCS1A02G388400	1.38768	2.79677e-15
TraesCS2A02G433500	1.38643	5.60041e-56
TraesCS3A02G133100	1.3852	0.00333965
TraesCS7D02G491900	1.38161	0.00243014
TraesCS3B02G556500	1.38143	0.000158886
TraesCS3B02G287200	1.3787	3.07043e-05
TraesCS6D02G353300	1.37703	1.23112e-34
TraesCS6B02G329300	1.37691	1.09383e-08
TraesCS3A02G309100	1.37577	1.36542e-24
TraesCS1A02G406300	1.36895	3.19657e-15
TraesCS1A02G250400	1.36785	1.08041e-08
TraesCS6B02G059000	1.36697	3.6548e-23
TraesCS5B02G560800	1.36529	1.04396e-09
TraesCS1A02G231500	1.36351	6.75517e-05
TraesCS3D02G128500	1.36143	8.85516e-06
TraesCSU02G024000	1.35913	0.00032383
TraesCS3B02G549800	1.35819	0.000195711
TraesCS3A02G377300	1.35664	0.000544141
TraesCS7D02G102100	1.35612	3.54919e-06
TraesCS1A02G416600	1.3506	1.83042e-33
TraesCS1A02G267700	1.35013	0.00458303
TraesCS5D02G457200	1.35	0.000752488
TraesCS3D02G084600	1.34984	0.00133966
TraesCS1A02G443900	1.34763	7.20344e-141
TraesCS6D02G054900	1.34561	2.4923e-30
TraesCS1A02G367100	1.34409	8.92981e-05
TraesCS1A02G305500	1.34213	0.00176412
TraesCS1A02G239700	1.33934	1.2765e-05
TraesCS1A02G300600	1.33839	0.00584666
TraesCS1A02G241000	1.33801	4.74127e-25
TraesCS4B02G000800	1.33675	0.0038061
TraesCS3D02G027500	1.33624	5.81484e-05
TraesCS1A02G417700	1.3361	0.000851054
TraesCS2B02G608400	1.33562	0.000831789
TraesCS2D02G162200	1.33539	0.00337996
TraesCS1D02G237500	1.33438	8.95549e-91
TraesCS6B02G372300	1.3327	3.67874e-05
TraesCS1A02G408800	1.3323	0.0023529
TraesCS5A02G171600	1.3289	8.4158e-06
TraesCS5D02G165100	1.3284	0.00341182
TraesCS6B02G359100	1.3252	6.98224e-08
TraesCS3D02G078900	1.31985	2.35659e-10
TraesCS7D02G531800	1.31931	0.000960719
TraesCS3D02G254700	1.31827	4.65168e-05
TraesCS7D02G495500	1.31759	9.60012e-23
TraesCS6D02G382100	1.31661	0.00443531
TraesCS7D02G377400	1.31656	3.32931e-10
TraesCS1A02G265900	1.31651	1.72367e-54
TraesCS1A02G314400	1.31473	5.5775e-08
TraesCS6B02G075200	1.31408	6.7768e-15
TraesCS1A02G423700	1.31309	0.003065
TraesCS2A02G501900	1.31284	5.32584e-10
TraesCS3B02G056100	1.31281	0.00261971
TraesCS1A02G312400	1.31149	0.00043762
TraesCS6B02G191900	1.31074	4.82383e-45
TraesCS2B02G595300	1.30973	4.13636e-08
TraesCS1A02G315500	1.30971	6.83047e-05
TraesCS4D02G243100	1.30968	2.5791e-33
TraesCS1A02G376500	1.30964	0.000747037
TraesCS1A02G295300	1.30883	5.23129e-09
TraesCS3A02G529400	1.30806	1.44627e-06
TraesCS1A02G368800	1.30498	0.000989751
TraesCS1A02G365200	1.3042	0.00638052
TraesCS2D02G573000	1.304	1.14011e-05
TraesCS3B02G107200	1.30365	1.62442e-14
TraesCS6B02G439700	1.3024	0.0029167
TraesCS7B02G296800	1.3022	1.98407e-17
TraesCS5A02G478300	1.29895	3.21695e-11
TraesCS1A02G281600	1.29783	2.33087e-25
TraesCS5D02G146600	1.29737	6.71055e-06
TraesCS2D02G329900	1.29554	2.53752e-05
TraesCS6D02G018500	1.2925	5.72047e-11
TraesCS1A02G303600	1.29014	5.86043e-20
TraesCS6D02G162700	1.28967	3.67276e-16
TraesCS2B02G267400	1.28964	0.00235262
TraesCS6B02G132400	1.2895	2.55958e-07
TraesCS1A02G221400	1.28692	0.000407948
TraesCS1A02G261800	1.28683	1.58685e-15
TraesCS1A02G229800	1.28608	0.00172049
TraesCS7D02G175900	1.28598	6.73657e-09
TraesCS5A02G205700	1.28461	0.000320936
TraesCS1A02G408900	1.28405	1.42967e-19
TraesCS7D02G495200	1.28316	2.56542e-07
TraesCS4D02G200700	1.28238	2.74351e-07
TraesCS7D02G302000	1.27885	2.03953e-10
TraesCS1A02G284900	1.27861	9.88015e-24
TraesCS2B02G085500	1.27636	0.00050374
TraesCS4A02G192900	1.27412	2.22559e-21
TraesCS6B02G367100	1.27384	4.14552e-18
TraesCS1A02G285600	1.27291	2.12992e-07
TraesCS1A02G238800	1.27271	3.57729e-27
TraesCS1A02G372400	1.27229	6.09485e-70
TraesCS1A02G281100	1.27004	0.00028807
TraesCS1B02G324300	1.26875	1.43012e-30
TraesCS4D02G359900	1.26796	0.000244797
TraesCS2A02G564300	1.26775	0.00286393
TraesCS1A02G291800	1.26595	0.00289039
TraesCS1A02G263000	1.26553	2.45124e-09
TraesCS2A02G507400	1.26551	3.69802e-32
TraesCS4D02G068900	1.26541	6.3224e-17
TraesCS3B02G020700	1.26473	1.33555e-13
TraesCS5A02G498300	1.26462	0.000989421
TraesCS1A02G298900	1.26432	9.85296e-45
TraesCS7A02G381100	1.26415	6.19717e-16
TraesCS1D02G436500	1.26379	3.54554e-12
TraesCS4D02G285300	1.26352	0.000356622
TraesCS6D02G094700	1.26298	3.66127e-28
TraesCS7D02G142000	1.26235	0.000498168
TraesCS1A02G281000	1.26209	1.63881e-32
TraesCS4D02G328900	1.26191	1.53803e-13
TraesCS1A02G358400	1.25985	9.00254e-10
TraesCS4D02G219400	1.25969	3.36304e-08
TraesCS3B02G428800	1.25967	0.00206973
TraesCS2D02G459600	1.25953	0.00128464
TraesCS1B02G111200	1.25898	1.17527e-06
TraesCS1A02G252400	1.25898	2.61638e-11
TraesCS3A02G375100	1.25865	0.00429678
TraesCS6D02G020700	1.25757	5.24727e-11
TraesCS3B02G536100	1.25715	6.82632e-11
TraesCS1A02G292000	1.2563	4.96009e-05
TraesCS2A02G509600	1.25327	0.000255408
TraesCS2D02G431500	1.25296	6.72745e-49
TraesCS6D02G310500	1.25285	1.40003e-45
TraesCS1A02G425400	1.25273	2.07536e-06
TraesCS1A02G311900	1.25051	0.00131592
TraesCS7D02G133500	1.24817	2.41537e-25
TraesCS1B02G121700	1.2481	0.0059123
TraesCS2B02G163300	1.24794	0.00614216
TraesCS4A02G203400	1.24626	3.18637e-06
TraesCS1A02G279800	1.24589	4.22528e-22
TraesCS6A02G041700	1.24523	1.89651e-17
TraesCS2B02G521300	1.24506	0.000367902
TraesCS2A02G350900	1.24505	2.0861e-06
TraesCS7B02G455300	1.24491	0.000214852
TraesCS1A02G356900	1.24487	0.000119445
TraesCS3B02G113500	1.24387	4.87883e-59
TraesCS1A02G332200	1.24324	1.90694e-11
TraesCS6A02G057400	1.24318	3.38329e-13
TraesCS3B02G372300	1.24223	1.04846e-09
TraesCS1A02G275300	1.24206	9.90658e-10
TraesCS1A02G255000	1.2407	3.7932e-09
TraesCS1A02G334800	1.24069	3.32093e-26
TraesCS1A02G364200	1.24029	6.87078e-17
TraesCS6B02G347700	1.23911	0.00257172
TraesCS1A02G278300	1.23875	4.44841e-10
TraesCS2D02G321600	1.23868	1.4106e-05
TraesCS1B02G364200	1.23793	7.7419e-29
TraesCS1A02G433400	1.23729	0.00312587
TraesCS7A02G053100	1.23647	9.0163e-05
TraesCS5B02G549300	1.23645	0.000123263
TraesCS1A02G290800	1.23513	1.15157e-08
TraesCS2D02G502400	1.23492	8.8468e-22
TraesCS3D02G181800	1.23481	7.90507e-11
TraesCS2B02G119100	1.23388	0.00160748
TraesCS3D02G518200	1.23216	2.25774e-08
TraesCS7B02G257400	1.23109	3.45926e-13
TraesCS3B02G152200	1.22894	1.77947e-12
TraesCS4B02G315400	1.22675	2.40753e-05
TraesCS2D02G115300	1.22667	0.000261165
TraesCS5B02G536200	1.22606	5.48428e-08
TraesCS3A02G356600	1.22443	5.22967e-07
TraesCS6A02G318700	1.22341	4.17555e-07
TraesCS4D02G045400	1.2234	0.00334691
TraesCS7D02G516600	1.22281	6.50851e-22
TraesCS3B02G410400	1.22056	1.71096e-33
TraesCS5B02G010900	1.22023	3.56181e-05
TraesCS1A02G279100	1.21956	3.88012e-30
TraesCS1D02G047200	1.21865	6.05624e-07
TraesCS1A02G259100	1.2173	8.64359e-37
TraesCS7A02G454300	1.21582	1.42021e-06
TraesCS2D02G070300	1.21561	0.000333444
TraesCS5D02G342600	1.21433	1.53751e-06
TraesCS7A02G090300	1.21357	0.0058046
TraesCS1A02G367200	1.21344	3.96222e-05
TraesCS5A02G229700	1.21086	0.000462128
TraesCS1A02G363100	1.21079	6.4715e-22
TraesCS6B02G056900	1.21024	8.8993e-18
TraesCS1A02G384000	1.2095	3.54512e-11
TraesCS2B02G454100	1.20447	9.99387e-07
TraesCS2B02G464900	1.20417	0.000299991
TraesCS4D02G263500	1.20311	3.18957e-08
TraesCS4A02G446500	1.20248	1.28066e-05
TraesCS5B02G478100	1.20231	2.64732e-12
TraesCS1A02G360500	1.1992	4.41998e-30
TraesCS2A02G172600	1.19734	7.82164e-06
TraesCS7D02G203900	1.19543	0.000124341
TraesCS1A02G258200	1.1954	1.10108e-38
TraesCS6B02G406000	1.19475	3.50658e-18
TraesCS1D02G223000	1.1935	5.96276e-05
TraesCS2A02G377200	1.1927	0.000214229
TraesCS1A02G246400	1.19107	2.01505e-40
TraesCS1A02G280600	1.19088	1.35469e-38
TraesCS6D02G153100	1.19021	1.59185e-50
TraesCS5A02G338200	1.18937	0.00556237
TraesCS3D02G048200	1.18573	1.41667e-07
TraesCS1A02G373200	1.18328	9.24454e-12
TraesCS5B02G132000	1.18219	1.77712e-07
TraesCS1A02G366700	1.18137	2.82007e-26
TraesCS1A02G414700	1.18129	0.00286142
TraesCS1A02G259400	1.1804	0.000402102
TraesCS3D02G256100	1.1798	8.38998e-06
TraesCS1A02G259000	1.17927	2.17635e-16
TraesCS7B02G058500	1.17894	0.000624568
TraesCS1A02G280900	1.17883	0.00338421
TraesCS6A02G017500	1.17851	8.79552e-06
TraesCS1A02G325500	1.17822	5.78378e-28
TraesCS7D02G390300	1.17706	1.68648e-15
TraesCS1A02G265600	1.17665	8.49771e-90
TraesCS5D02G532500	1.1763	0.00564973
TraesCS7B02G445700	1.17586	1.4049e-07
TraesCS1A02G319500	1.1745	0.00118805
TraesCS1A02G283100	1.17446	0.00216965
TraesCS3A02G369900	1.17387	2.40069e-05
TraesCS1A02G311200	1.17365	0.000331014
TraesCS4B02G328400	1.17279	8.40017e-08
TraesCS1A02G282800	1.17227	1.54127e-05
TraesCS1A02G363200	1.1703	1.95935e-05
TraesCS2D02G198900	1.16956	3.7596e-05
TraesCS7A02G529000	1.16946	1.918e-05
TraesCS6B02G217300	1.16793	1.21589e-06
TraesCS4B02G060100	1.16744	0.000331291
TraesCS5B02G389500	1.16743	0.000515973
TraesCS7A02G134100	1.16718	5.01687e-31
TraesCS5D02G514700	1.16664	0.000102643
TraesCS6D02G191500	1.16638	6.1262e-12
TraesCS1A02G021000	1.16618	3.16242e-15
TraesCS4D02G325500	1.16614	7.38708e-05
TraesCS2A02G287600	1.16575	0.00596385
TraesCS2D02G346600	1.16456	0.0033235
TraesCS1A02G413700	1.1615	7.41277e-07
TraesCS1A02G342900	1.16147	5.35625e-13
TraesCS4D02G002100	1.16028	1.44062e-05
TraesCS5D02G550900	1.15958	0.0013653
TraesCS3D02G188000	1.15914	2.9812e-25
TraesCS5A02G261400	1.15903	0.000947076
TraesCS5B02G015700	1.15826	9.71057e-06
TraesCS7B02G445500	1.15618	3.95434e-07
TraesCS1A02G260400	1.15536	0.00333786
TraesCS5B02G059800	1.15495	2.86843e-05
TraesCS1A02G334100	1.15485	1.6762e-13
TraesCS5B02G183500	1.15257	2.06195e-24
TraesCS2A02G380100	1.15218	9.21019e-10
TraesCS7D02G233900	1.15152	3.16312e-11
TraesCS1A02G361100	1.15115	2.39895e-12
TraesCS4D02G055700	1.14974	3.47512e-11
TraesCS4B02G045100	1.14746	0.00452045
TraesCS1D02G282300	1.14731	0.000987098
TraesCS3B02G355900	1.14717	0.000471928
TraesCS1A02G431500	1.14714	2.09316e-08
TraesCS1A02G401800	1.1471	0.00270453
TraesCS1A02G215100	1.14705	1.13296e-09
TraesCS4A02G235300	1.14607	1.27981e-07
TraesCS7A02G537300	1.14298	5.87889e-08
TraesCS1A02G367500	1.14128	3.40248e-05
TraesCS6D02G218600	1.14065	6.63875e-05
TraesCS1A02G298000	1.14059	2.46988e-08
TraesCS6A02G416000	1.14046	2.10873e-19
TraesCS2B02G157500	1.1397	0.00026463
TraesCS5A02G193600	1.13915	0.000114672
TraesCS6B02G273300	1.13832	0.00222002
TraesCS7A02G090100	1.13655	0.000807179
TraesCS5B02G426300	1.13638	1.5436e-09
TraesCS3D02G497000	1.13532	0.000134718
TraesCS3D02G362800	1.13484	0.000735304
TraesCS1A02G310700	1.13482	1.02603e-08
TraesCS2D02G313700	1.13477	1.85693e-12
TraesCS1A02G395200	1.1347	2.16489e-40
TraesCS1A02G264900	1.13429	2.96269e-14
TraesCS1A02G284000	1.13405	1.04057e-08
TraesCS6B02G359000	1.1339	2.22355e-09
TraesCS5B02G072300	1.13211	0.00331744
TraesCS7B02G443200	1.1321	3.21089e-06
TraesCS7A02G418500	1.13201	0.000107804
TraesCS7B02G474300	1.13122	3.00598e-13
TraesCS1A02G289300	1.13116	3.41809e-13
TraesCS1B02G309000	1.13088	3.76745e-05
TraesCS4D02G045300	1.13075	3.31673e-13
TraesCS4B02G045400	1.1306	1.46244e-16
TraesCS1A02G263700	1.13003	8.71854e-39
TraesCS1A02G265700	1.12912	2.15935e-75
TraesCS5D02G176400	1.12855	0.000120735
TraesCS2B02G059500	1.12789	0.00363265
TraesCS1A02G357300	1.12688	4.22229e-19
TraesCS7B02G035200	1.12534	1.70954e-08
TraesCS2D02G315200	1.1251	8.33517e-08
TraesCS1B02G125400	1.12499	2.35394e-14
TraesCS3D02G144900	1.12397	6.15553e-16
TraesCS1A02G239800	1.1237	5.41318e-15
TraesCS7D02G443400	1.12367	5.58716e-05
TraesCS1A02G245600	1.1231	8.34274e-25
TraesCS7A02G102800	1.12274	6.84879e-05
TraesCS7A02G269400	1.12241	0.000179648
TraesCS3D02G534800	1.12217	2.9616e-30
TraesCS2B02G586400	1.12217	1.33637e-06
TraesCS7B02G079500	1.12147	3.91047e-16
TraesCS1A02G387700	1.12043	5.64183e-61
TraesCS1A02G355500	1.1199	5.03269e-38
TraesCS3B02G563300	1.11962	2.16448e-13
TraesCS1B02G249000	1.11824	4.68921e-47
TraesCS3A02G298200	1.11805	0.00216471
TraesCS1B02G374900	1.11531	1.11629e-08
TraesCS1A02G251200	1.11494	6.83672e-18
TraesCS1A02G375200	1.11406	0.000268881
TraesCS1A02G398300	1.11338	9.09446e-12
TraesCS3A02G397000	1.11305	4.72665e-09
TraesCS5B02G290200	1.11205	1.49459e-12
TraesCS1A02G351900	1.1119	2.08292e-42
TraesCS1A02G407600	1.11152	2.38485e-16
TraesCS1A02G262800	1.10975	1.03861e-19
TraesCS2D02G258800	1.10922	0.00474864
TraesCS1A02G270900	1.10908	7.46703e-11
TraesCS1A02G337800	1.10884	8.05301e-33
TraesCS3A02G428700	1.10875	0.000576927
TraesCS6B02G384900	1.10649	2.14013e-09
TraesCS6D02G089000	1.10623	9.09294e-11
TraesCS6B02G024900	1.10513	4.27866e-08
TraesCS6B02G200000	1.10453	9.8427e-07
TraesCS4D02G124600	1.10407	0.000435541
TraesCS2B02G028500	1.10342	0.00227424
TraesCS3D02G434200	1.10292	0.00267909
TraesCS1A02G308000	1.10261	3.62592e-11
TraesCS6B02G298700	1.10255	0.00419761
TraesCS5B02G530800	1.10111	0.000827285
TraesCS3B02G183400	1.10109	9.71048e-08
TraesCS2B02G204500	1.10088	1.38055e-12
TraesCS7D02G277400	1.10073	6.48996e-11
TraesCS1A02G364500	1.09961	7.44399e-09
TraesCS1A02G423800	1.0994	2.8048e-65
TraesCS3B02G146500	1.09844	0.00382758
TraesCS2B02G483100	1.09769	2.21584e-08
TraesCS3B02G099400	1.09365	4.60783e-09
TraesCS5D02G568400	1.09363	4.79375e-11
TraesCS2B02G537500	1.09357	3.76996e-06
TraesCS6B02G114000	1.09329	0.0012259
TraesCS7B02G413500	1.09305	0.000233815
TraesCS7D02G524200	1.0926	0.000708527
TraesCS1D02G312800	1.09244	6.11062e-35
TraesCS1A02G246100	1.09176	4.06828e-05
TraesCS1A02G257200	1.09136	1.09832e-06
TraesCS1A02G341500	1.0905	4.24001e-07
TraesCS5A02G494800	1.08908	4.74034e-18
TraesCS3A02G390000	1.08797	1.37085e-22
TraesCS1B02G393100	1.08731	0.000799634
TraesCS1A02G323900	1.0873	1.31233e-05
TraesCS5D02G050100	1.08715	2.21628e-14
TraesCS1A02G240200	1.08674	0.00161562
TraesCS3D02G318600	1.08564	6.27766e-07
TraesCS1A02G390400	1.0847	1.41085e-07
TraesCS2A02G367700	1.08451	2.78927e-06
TraesCS5A02G261200	1.08446	3.90965e-06
TraesCS6A02G159400	1.08296	3.83739e-37
TraesCS1A02G247900	1.08253	5.04034e-16
TraesCS2A02G186600	1.08202	0.000454617
TraesCS6A02G376200	1.08153	3.31261e-05
TraesCS1A02G363300	1.08122	7.83407e-08
TraesCS4D02G348600	1.08063	1.20911e-08
TraesCS2B02G028000	1.07989	0.00178653
TraesCS7A02G523800	1.07987	6.25303e-06
TraesCS5D02G021700	1.0781	3.40795e-07
TraesCS1A02G368100	1.07772	7.12758e-08
TraesCS1A02G189100	1.07646	2.17753e-17
TraesCS6B02G404800	1.07625	0.000142802
TraesCS1A02G248800	1.07499	1.81667e-08
TraesCS6D02G018400	1.07456	5.20188e-13
TraesCS1A02G394400	1.07408	9.45064e-46
TraesCS1A02G243100	1.07374	5.23564e-05
TraesCS1A02G283000	1.07303	2.38464e-07
TraesCS1A02G251100	1.07222	7.91343e-05
TraesCS7D02G279900	1.07201	3.05604e-14
TraesCS1A02G425100	1.07175	6.00239e-08
TraesCS4A02G093000	1.07173	1.72695e-06
TraesCS1A02G381500	1.07163	4.11784e-25
TraesCS4D02G212100	1.07061	5.35782e-25
TraesCS1A02G373000	1.07056	1.88502e-08
TraesCS1A02G330700	1.07033	9.29277e-08
TraesCS7B02G185600	1.07031	2.36711e-05
TraesCS1A02G262600	1.07031	2.03394e-13
TraesCS7B02G277300	1.06995	1.00377e-06
TraesCS1A02G403000	1.06943	7.91421e-18
TraesCS1A02G391000	1.06923	1.7034e-13
TraesCS1A02G300800	1.06832	5.78194e-09
TraesCS3D02G255200	1.06816	2.72304e-09
TraesCS2A02G556100	1.06713	0.000224042
TraesCS3A02G486000	1.06523	1.76495e-34
TraesCS5D02G244900	1.06462	2.19987e-13
TraesCS6D02G079500	1.06451	0.00070632
TraesCS1A02G110900	1.0644	3.43556e-17
TraesCS1A02G364000	1.06428	9.42405e-53
TraesCS6B02G362700	1.06305	3.18587e-34
TraesCS2A02G481400	1.06216	1.11447e-07
TraesCS6D02G289700	1.06196	4.63889e-08
TraesCS1A02G352700	1.06176	0.00014728
TraesCS5D02G386900	1.06167	7.23922e-07
TraesCS1A02G258100	1.06162	5.57551e-13
TraesCS7B02G355200	1.0597	8.2905e-08
TraesCS5A02G318000	1.0582	1.69214e-05
TraesCSU02G246100	1.0578	8.89634e-13
TraesCS4D02G115000	1.05772	1.12638e-09
TraesCS4B02G321900	1.0575	1.08404e-06
TraesCS2D02G178900	1.05711	0.00169462
TraesCS1A02G415100	1.05605	3.75367e-14
TraesCS1A02G316900	1.05483	6.71336e-40
TraesCS1A02G366500	1.0546	0.000219017
TraesCS6B02G122200	1.05425	1.2469e-10
TraesCS7B02G190700	1.05389	1.25264e-13
TraesCS1A02G415200	1.05343	4.19415e-17
TraesCS6B02G346000	1.05341	2.06621e-21
TraesCS3B02G262700	1.05228	0.00116895
TraesCS1A02G304900	1.05142	0.000380167
TraesCS6B02G353600	1.05087	4.85705e-10
TraesCS5B02G056800	1.05063	0.00371947
TraesCS2D02G347200	1.0499	8.28834e-08
TraesCS1A02G441100	1.04894	4.2958e-07
TraesCS5A02G473600	1.04884	2.66341e-06
TraesCS5B02G197700	1.04865	9.37727e-06
TraesCS1A02G186300	1.04843	0.00666288
TraesCS1A02G243700	1.04648	4.3009e-08
TraesCS6D02G205700	1.04582	2.30844e-05
TraesCSU02G098500	1.04566	3.77692e-06
TraesCS6B02G170300	1.0456	0.00166313
TraesCS1A02G339700	1.04536	0.00304943
TraesCS1B02G129000	1.04534	2.42041e-23
TraesCS2B02G198900	1.04502	1.45567e-05
TraesCS6B02G356200	1.04458	6.52464e-09
TraesCS1A02G323000	1.04416	1.53804e-06
TraesCS1B02G404500	1.04405	9.65227e-08
TraesCS1A02G255800	1.04302	7.45014e-56
TraesCS6A02G073300	1.04294	4.05924e-05
TraesCS3A02G225100	1.04294	1.82475e-11
TraesCS6B02G473400	1.04199	4.44103e-18
TraesCS3B02G179500	1.04164	4.7955e-26
TraesCS7B02G171000	1.04131	8.57503e-08
TraesCS3D02G133200	1.04027	2.6317e-08
TraesCS4A02G066200	1.03783	8.72923e-21
TraesCS3B02G199800	1.03727	0.00102996
TraesCS2D02G301000	1.03694	1.9975e-14
TraesCS6B02G401700	1.03661	0.0019685
TraesCS1A02G270700	1.03636	6.60904e-24
TraesCS6A02G063800	1.0358	0.00203487
TraesCS2D02G136100	1.03556	6.31811e-05
TraesCS4D02G182800	1.03542	1.85437e-08
TraesCS3D02G219800	1.03507	0.00259161
TraesCS1A02G291400	1.03505	4.67426e-07
TraesCS4B02G234300	1.03479	0.000362908
TraesCS5A02G294600	1.03475	3.12342e-07
TraesCS2D02G534400	1.03468	0.00574945
TraesCS3B02G187700	1.03431	0.0019747
TraesCS1A02G236500	1.0332	1.39912e-10
TraesCS4D02G296200	1.03285	3.02393e-06
TraesCS3A02G377600	1.03245	2.51703e-13
TraesCS2B02G481200	1.03243	0.00156196
TraesCS7D02G097200	1.03239	3.73196e-10
TraesCS4D02G120400	1.03238	1.85813e-17
TraesCS2A02G136100	1.03236	0.00137994
TraesCS4A02G189600	1.03218	0.00104457
TraesCS5A02G481300	1.03211	5.99909e-10
TraesCS5B02G015500	1.03118	1.5492e-16
TraesCSU02G053800	1.03109	7.69042e-05
TraesCS1A02G235100	1.03106	1.09783e-32
TraesCS1D02G343300	1.03088	9.52024e-06
TraesCS6D02G310900	1.03088	9.79377e-05
TraesCS1A02G369900	1.03024	0.00281291
TraesCS4A02G488900	1.0302	0.000471891
TraesCS6A02G241700	1.03003	0.000411063
TraesCS5B02G129700	1.0295	1.50343e-05
TraesCS2B02G554900	1.02943	3.14698e-21
TraesCS4B02G341500	1.02939	0.000550102
TraesCS7A02G189500	1.02919	4.41351e-08
TraesCS1A02G411200	1.02911	7.79991e-13
TraesCS5B02G513700	1.02843	5.13755e-11
TraesCS6A02G173600	1.02781	1.21433e-11
TraesCS1A02G411600	1.02749	8.52877e-53
TraesCS4D02G081600	1.0271	3.0615e-17
TraesCS3B02G091800	1.02702	7.04347e-21
TraesCS1B02G148600	1.02676	0.000196633
TraesCS1A02G285200	1.02655	4.56042e-22
TraesCS2B02G530100	1.02633	1.22183e-16
TraesCS1A02G392000	1.02612	8.64844e-26
TraesCS5D02G568500	1.02473	4.78581e-14
TraesCS3D02G481400	1.02441	1.55162e-40
TraesCS7B02G209600	1.02417	7.16199e-07
TraesCS6A02G322900	1.02389	0.00382663
TraesCS1A02G371600	1.02368	9.63258e-06
TraesCS2A02G143300	1.02366	0.0019061
TraesCS1A02G249000	1.02333	0.00397318
TraesCS1B02G470800	1.02322	6.35264e-07
TraesCS1A02G228800	1.02312	0.00226827
TraesCS1A02G305400	1.0227	2.35127e-10
TraesCS4B02G083600	1.02237	7.09247e-16
TraesCS2D02G098200	1.0221	1.76714e-05
TraesCS2A02G348200	1.02124	0.00238236
TraesCS5B02G236300	1.02009	3.40394e-06
TraesCS5A02G263100	1.01945	0.000272297
TraesCS6B02G080000	1.01923	7.53262e-24
TraesCS1A02G312800	1.01756	0.000234996
TraesCS2B02G091300	1.01751	0.0019664
TraesCS3A02G021900	1.01643	2.43905e-06
TraesCS4A02G085000	1.01607	0.00417482
TraesCS6B02G193400	1.01571	9.01962e-36
TraesCS6D02G059300	1.0153	0.00289778
TraesCS1D02G040500	1.01486	2.12968e-18
TraesCS5D02G364900	1.01453	7.38012e-11
TraesCS1A02G277600	1.01447	6.29906e-12
TraesCS1A02G254100	1.0138	0.00146067
TraesCS5D02G463900	1.01369	1.43277e-15
TraesCS5A02G407700	1.01287	3.58312e-30
TraesCS1B02G205500	1.01265	0.0003145
TraesCS7B02G256000	1.01195	7.39876e-07
TraesCS6B02G041200	1.01168	7.98108e-16
TraesCS1A02G325400	1.01122	5.39636e-25
TraesCS5B02G156000	1.01089	3.83814e-08
TraesCS1A02G430200	1.01089	0.00323307
TraesCS7A02G550900	1.01078	1.29812e-17
TraesCS1A02G366400	1.01014	5.92644e-10
TraesCS3D02G223400	1.0099	2.25883e-09
TraesCS6B02G056800	1.00893	2.41475e-26
TraesCS5D02G338200	1.00861	2.95259e-05
TraesCS7A02G394800	1.00831	8.0068e-09
TraesCS4B02G118800	1.00764	0.000457898
TraesCS1A02G221700	1.00754	1.25972e-06
TraesCS1A02G409100	1.00597	0.00614027
TraesCS4D02G099000	1.00484	1.1733e-11
TraesCS5D02G507300	1.00419	3.12562e-11
TraesCS3A02G229900	1.00412	6.21335e-09
TraesCS1A02G245300	1.00363	2.59912e-10
TraesCS1D02G215900	1.00344	1.98803e-13
TraesCS1A02G369700	1.00261	5.75846e-26
TraesCS6D02G235800	1.00129	7.70628e-12
TraesCS1A02G373800	1.00093	0.00187743
TraesCS1A02G274400	1.00033	9.69645e-22
TraesCS1D02G444100	0.999872	0.000106397
TraesCS1A02G110800	0.999745	1.71844e-05
TraesCS3B02G537800	0.999638	3.50735e-05
TraesCS1A02G248200	0.999498	6.60543e-08
TraesCS3A02G416800	0.99922	2.83128e-21
TraesCS6B02G004400	0.998646	5.37129e-11
TraesCS2B02G515800	0.997032	0.000698001
TraesCS1A02G444800	0.996594	1.93804e-08
TraesCS4B02G107300	0.996231	2.78288e-06
TraesCS7B02G445600	0.996205	6.74466e-05
TraesCS4A02G331100	0.995906	0.00531582
TraesCS5B02G412500	0.99555	1.65015e-28
TraesCS2A02G432800	0.994972	1.95978e-06
TraesCS1A02G270800	0.993037	6.84559e-13
TraesCS1A02G331700	0.993037	9.90452e-20
TraesCS4D02G088500	0.992524	5.11814e-08
TraesCS2A02G318800	0.991518	0.00248618
TraesCS5D02G432900	0.990978	1.1361e-44
TraesCS6A02G283500	0.990309	1.2596e-10
TraesCS4B02G274700	0.989849	3.58917e-20
TraesCS2B02G286400	0.989648	3.12547e-08
TraesCS1A02G413900	0.989417	9.43632e-16
TraesCS5D02G440900	0.98922	7.51859e-08
TraesCS5D02G417600	0.989156	1.2199e-28
TraesCS1A02G420100	0.988878	5.8768e-07
TraesCS2D02G432800	0.988432	1.17361e-21
TraesCS1A02G428400	0.988216	2.73818e-14
TraesCS6B02G271000	0.987748	1.47979e-14
TraesCS5B02G490600	0.987413	0.00259965
TraesCS7B02G289600	0.987311	4.10586e-14
TraesCS4B02G097200	0.987097	0.000705868
TraesCS6A02G100300	0.986349	0.000142147
TraesCS1A02G426800	0.986332	1.80836e-05
TraesCS3D02G187400	0.986122	5.28539e-06
TraesCS3B02G251200	0.986026	2.13467e-08
TraesCS3D02G523300	0.985975	1.44052e-09
TraesCS5A02G433200	0.985882	1.50964e-05
TraesCS1D02G112300	0.985524	2.46624e-33
TraesCS4A02G339800	0.985043	6.74095e-06
TraesCS1A02G245500	0.984891	0.00494346
TraesCS4B02G142100	0.983767	1.97525e-13
TraesCS2B02G608900	0.983612	0.00325133
TraesCS3B02G339300	0.983207	0.00160101
TraesCS1A02G254200	0.983149	4.34698e-44
TraesCS1A02G427000	0.983098	3.10606e-15
TraesCS7D02G372600	0.98308	0.0017622
TraesCS3B02G475000	0.981665	0.00515901
TraesCS1B02G077300	0.980927	0.000263796
TraesCS5D02G532100	0.980472	8.57641e-08
TraesCS1A02G374500	0.979287	0.00185855
TraesCS6B02G077800	0.979256	4.34086e-11
TraesCS1A02G330300	0.978775	1.56452e-32
TraesCS4B02G276100	0.978309	0.00455802
TraesCS1A02G236400	0.978285	7.55333e-12
TraesCS1A02G231000	0.977877	2.72038e-13
TraesCS4A02G178300	0.976971	0.0025982
TraesCS1B02G059900	0.97649	0.000605125
TraesCS6B02G324800	0.976347	1.35329e-08
TraesCS1B02G174600	0.975508	3.90712e-45
TraesCS5B02G491200	0.975157	2.72161e-07
TraesCS1A02G270600	0.974901	7.28085e-13
TraesCS2B02G521100	0.974251	3.05505e-05
TraesCS6D02G307500	0.974024	1.45111e-06
TraesCS5D02G504800	0.973361	4.04988e-08
TraesCS1A02G445000	0.972429	4.7866e-17
TraesCS1A02G374400	0.971699	5.00022e-23
TraesCS6B02G323400	0.971434	5.38372e-05
TraesCS5B02G321800	0.971315	1.35869e-52
TraesCS5A02G524400	0.971149	1.95283e-10
TraesCS1A02G374200	0.970831	5.58691e-10
TraesCS5A02G369100	0.970769	3.27939e-05
TraesCS3D02G501500	0.970315	0.000353347
TraesCS1A02G269500	0.970013	8.18885e-08
TraesCS6B02G302400	0.969943	7.5691e-12
TraesCS1A02G446000	0.969265	0.0033857
TraesCS3D02G354300	0.967834	2.67442e-07
TraesCS1A02G357900	0.967658	2.39187e-26
TraesCS1A02G301600	0.967602	5.45507e-23
TraesCS4B02G122300	0.967486	1.19146e-20
TraesCS5A02G424400	0.967461	2.50752e-31
TraesCS1A02G327800	0.967315	0.000237954
TraesCS1A02G174700	0.967231	1.43313e-45
TraesCS7B02G034400	0.967175	0.00045466
TraesCS7D02G437000	0.96698	1.1562e-11
TraesCS3B02G098700	0.966937	8.24929e-16
TraesCS5B02G394200	0.966602	1.22824e-66
TraesCS1B02G377600	0.966079	3.34717e-07
TraesCS1A02G305800	0.966013	0.000791467
TraesCS1A02G251900	0.965642	0.000586646
TraesCS1A02G413300	0.964899	7.42873e-05
TraesCS6B02G355900	0.964842	0.00060326
TraesCS1A02G433300	0.964731	5.10614e-05
TraesCS7D02G271600	0.964184	5.85616e-12
TraesCS1A02G445800	0.963658	0.00532082
TraesCS2B02G459100	0.963577	7.70528e-10
TraesCS6D02G243900	0.963357	0.000100975
TraesCS5B02G436300	0.96298	2.47846e-15
TraesCS3D02G370700	0.962716	2.45481e-16
TraesCS3A02G142700	0.96247	1.84285e-11
TraesCS1D02G122800	0.962265	6.27962e-23
TraesCS6B02G362400	0.962211	0.000262732
TraesCS7B02G441100	0.961963	2.87925e-11
TraesCS2D02G254500	0.961771	5.05398e-15
TraesCS1A02G234200	0.96143	2.46065e-14
TraesCS3A02G413700	0.961217	1.96616e-07
TraesCS3B02G374600	0.960593	0.00242702
TraesCS5D02G324300	0.960187	0.000962084
TraesCS1A02G238700	0.959842	8.5518e-19
TraesCS1A02G273000	0.959332	1.30457e-07
TraesCS1A02G236700	0.959252	0.000336148
TraesCS1A02G442400	0.959207	6.94599e-21
TraesCS5D02G030700	0.959035	4.8016e-07
TraesCS1A02G281800	0.958651	2.29208e-08
TraesCS7D02G087500	0.958524	1.87528e-12
TraesCS5B02G236500	0.9585	1.94496e-05
TraesCS7A02G307300	0.957629	4.51376e-21
TraesCS1A02G363600	0.957443	0.00210437
TraesCS6D02G305400	0.95664	9.60567e-18
TraesCS1A02G160200	0.956562	0.000113532
TraesCS7D02G309200	0.956281	7.16236e-06
TraesCS1D02G361500	0.955736	3.69342e-16
TraesCS2D02G000200	0.955584	0.002721
TraesCSU02G122000	0.955377	8.51344e-13
TraesCS7D02G536800	0.953872	4.48798e-12
TraesCS3D02G261800	0.95232	7.39072e-05
TraesCS1D02G114700	0.952093	2.03905e-05
TraesCS3D02G184300	0.951782	0.000409112
TraesCS5A02G465200	0.951729	1.80913e-13
TraesCS3B02G132700	0.951171	4.14743e-05
TraesCS1A02G411100	0.951083	2.58855e-06
TraesCS1A02G242100	0.95092	0.000195423
TraesCS1B02G127900	0.950601	8.35209e-11
TraesCS1B02G234900	0.949934	7.9537e-15
TraesCS5A02G001400	0.949382	7.21012e-24
TraesCS2D02G348900	0.948103	0.000222305
TraesCS7D02G014200	0.947822	0.00598706
TraesCS4D02G280800	0.9475	5.82559e-05
TraesCS1A02G422900	0.947312	0.00115564
TraesCS4A02G230900	0.946766	2.31006e-09
TraesCS1A02G256300	0.946411	1.18458e-23
TraesCS5B02G426500	0.94635	1.56472e-23
TraesCS1A02G295800	0.945992	0.000700194
TraesCS6D02G152300	0.945941	0.000639235
TraesCS1D02G403300	0.945827	5.56966e-09
TraesCS7A02G305200	0.945203	0.000385122
TraesCS1A02G365700	0.944822	0.000950096
TraesCS4B02G203100	0.943731	1.56691e-12
TraesCS5A02G490100	0.943592	7.36171e-07
TraesCS1A02G286200	0.943486	7.93576e-21
TraesCS1A02G330500	0.942954	8.69425e-19
TraesCS1D02G305200	0.941864	0.00127001
TraesCS6B02G358900	0.94179	2.58533e-12
TraesCS5D02G066100	0.941409	1.58158e-06
TraesCS1A02G234900	0.941133	8.55137e-20
TraesCS5A02G502800	0.940958	6.15863e-12
TraesCS1A02G255100	0.940236	7.97585e-35
TraesCS4D02G104200	0.940055	0.00342819
TraesCS1A02G358700	0.939386	1.03353e-05
TraesCS6B02G401300	0.93934	9.85207e-10
TraesCS2B02G260200	0.938707	1.77271e-36
TraesCS3D02G033800	0.93799	1.52061e-10
TraesCS4D02G008300	0.937909	1.60443e-07
TraesCS3B02G200000	0.937879	0.00198694
TraesCS5B02G016100	0.93752	1.08696e-11
TraesCS1A02G388000	0.936566	3.69426e-10
TraesCS1A02G422400	0.936229	7.49147e-11
TraesCS1A02G270200	0.935905	0.000999979
TraesCS5B02G159000	0.935203	6.61215e-12
TraesCS1A02G286000	0.935168	9.60238e-07
TraesCS1A02G263800	0.935128	4.53123e-06
TraesCS1A02G288900	0.934718	8.1736e-09
TraesCS4D02G302500	0.934484	1.72607e-08
TraesCS7A02G103700	0.933707	0.00559677
TraesCS4B02G263300	0.933663	5.33687e-10
TraesCS4B02G031200	0.933263	0.00277789
TraesCS7A02G483700	0.933241	9.05195e-17
TraesCS1A02G262300	0.933087	2.84203e-34
TraesCS6B02G198900	0.932676	4.18336e-42
TraesCS3A02G280600	0.932495	1.13256e-30
TraesCS1D02G047300	0.932296	3.82765e-19
TraesCS6D02G076400	0.932201	0.00251538
TraesCS1A02G396000	0.932046	1.88713e-28
TraesCS5B02G310800	0.931979	7.07511e-06
TraesCS1A02G434600	0.931829	8.89616e-06
TraesCS5B02G336900	0.931683	0.000297479
TraesCS3B02G462800	0.930876	8.26103e-16
TraesCS2B02G570600	0.930832	0.00152204
TraesCS4A02G017700	0.930575	1.6801e-24
TraesCS7B02G349100	0.930507	6.98073e-07
TraesCS7A02G118700	0.930259	0.000540163
TraesCS6B02G296400	0.930027	1.13904e-08
TraesCS4A02G225100	0.929883	1.0379e-15
TraesCS1A02G230100	0.929791	2.56507e-05
TraesCS3D02G145200	0.929582	2.65425e-05
TraesCS6A02G327700	0.929092	1.67549e-09
TraesCS4A02G445600	0.928231	1.59142e-07
TraesCS1A02G301400	0.92818	3.38002e-05
TraesCS1A02G367000	0.927864	7.54133e-11
TraesCS7B02G440900	0.927228	7.02956e-05
TraesCS2A02G438300	0.926923	1.96168e-18
TraesCS1A02G327200	0.92685	4.04451e-19
TraesCS3A02G146500	0.92684	1.04383e-05
TraesCS7D02G421900	0.926373	7.32738e-05
TraesCS1D02G109300	0.925885	0.00497135
TraesCS5D02G467100	0.925822	1.72408e-17
TraesCS1A02G256400	0.925675	5.83377e-12
TraesCS1A02G235000	0.925631	4.70454e-19
TraesCS1D02G433600	0.925471	0.000561943
TraesCS1A02G333900	0.925447	4.01104e-14
TraesCS2A02G270200	0.925258	3.06672e-11
TraesCS2D02G255600	0.924928	0.00569321
TraesCS4A02G298900	0.924795	2.94787e-10
TraesCS5B02G315700	0.924788	6.64906e-08
TraesCS1A02G165700	0.924094	1.36348e-34
TraesCS1A02G298100	0.923626	6.12463e-11
TraesCS2D02G269200	0.923235	7.61553e-11
TraesCS6B02G177100	0.922653	6.26156e-06
TraesCS3A02G183800	0.921723	1.76207e-05
TraesCS3B02G090400	0.921595	0.000100293
TraesCS5B02G355800	0.921543	2.472e-26
TraesCS5B02G110500	0.921202	3.6536e-09
TraesCS1A02G322700	0.921082	9.15096e-07
TraesCS5D02G190600	0.921042	3.46478e-18
TraesCS3D02G024700	0.920787	0.000133607
TraesCS7B02G365300	0.920574	0.000582511
TraesCS1D02G284400	0.920361	3.76568e-11
TraesCS1A02G358600	0.919874	5.22002e-32
TraesCS1A02G385900	0.919673	1.22205e-09
TraesCS5B02G561300	0.919443	0.000133875
TraesCS3B02G483500	0.919276	1.11546e-05
TraesCS4D02G044800	0.918895	0.00197792
TraesCS1D02G217700	0.918662	0.00254456
TraesCS2B02G480800	0.918529	0.00294482
TraesCS6A02G331900	0.918389	1.09893e-15
TraesCS1D02G175000	0.917994	9.9651e-34
TraesCS1A02G269100	0.917753	4.67656e-14
TraesCS1A02G095800	0.916752	0.00467306
TraesCS2A02G365000	0.916027	3.38356e-06
TraesCS5D02G403700	0.915905	7.57699e-16
TraesCS1A02G325600	0.915103	2.04624e-20
TraesCS2D02G223000	0.915094	3.30481e-05
TraesCS1A02G364400	0.914727	1.64164e-18
TraesCS5A02G182600	0.914576	0.000541605
TraesCS3A02G118200	0.91443	0.000759248
TraesCS1A02G259700	0.914423	3.40602e-12
TraesCS1A02G283800	0.914391	1.33277e-18
TraesCS1A02G418300	0.914141	2.45158e-20
TraesCS3A02G230000	0.912868	3.17515e-54
TraesCS2A02G066600	0.9126	0.000392545
TraesCS7B02G354800	0.912574	0.0025072
TraesCS3B02G236600	0.912471	4.17173e-20
TraesCS7B02G205100	0.912265	1.13338e-09
TraesCS4A02G031000	0.912175	1.19033e-08
TraesCS6D02G401200	0.912019	4.74392e-12
TraesCS1A02G260900	0.911642	8.63092e-25
TraesCS7B02G128000	0.91164	1.64368e-06
TraesCS1B02G182400	0.911411	1.29183e-31
TraesCS1B02G138900	0.911059	1.00096e-05
TraesCS1A02G389500	0.910524	2.14619e-25
TraesCS5A02G063900	0.910337	6.64407e-13
TraesCS6B02G402000	0.910106	7.68366e-08
TraesCS3B02G152300	0.909555	6.63176e-07
TraesCS3D02G083700	0.909528	5.89746e-10
TraesCS1A02G350500	0.909275	4.54788e-21
TraesCS3A02G045200	0.90885	0.00219585
TraesCS6A02G271600	0.908599	5.99861e-12
TraesCS3B02G158500	0.908413	0.00013599
TraesCS1A02G355200	0.908184	1.69675e-18
TraesCS1A02G261000	0.907612	7.62886e-18
TraesCS6D02G245800	0.907019	6.30199e-08
TraesCS6A02G018200	0.906622	5.79781e-08
TraesCS1D02G090200	0.906048	0.000507691
TraesCS2B02G411900	0.905755	8.96226e-22
TraesCS1A02G295200	0.905665	2.50022e-05
TraesCS1A02G157200	0.905513	0.000911432
TraesCS1A02G269200	0.905365	9.72852e-06
TraesCS1D02G164300	0.904969	1.01092e-33
TraesCS1A02G283200	0.904831	2.64005e-09
TraesCS6A02G301300	0.903946	5.14007e-05
TraesCS1A02G278100	0.903763	2.18765e-08
TraesCS5A02G535400	0.90374	0.000114638
TraesCS1A02G231100	0.903212	2.35841e-12
TraesCS2B02G369100	0.903038	3.09068e-07
TraesCS1A02G246600	0.902972	1.17891e-22
TraesCS1A02G242400	0.902668	9.00667e-20
TraesCS5B02G571400	0.902668	2.83362e-10
TraesCS7B02G133800	0.902302	5.71837e-11
TraesCS1A02G399600	0.902223	2.03184e-09
TraesCS6A02G093300	0.902003	1.81519e-06
TraesCS5A02G478100	0.901989	0.00155603
TraesCS5D02G477800	0.901746	2.55723e-11
TraesCS6A02G323000	0.901436	4.7256e-11
TraesCS2B02G297700	0.900606	5.47165e-07
TraesCS1A02G283900	0.900405	9.21057e-08
TraesCS2B02G454500	0.900335	6.92991e-40
TraesCS1B02G226200	0.900138	0.000380787
TraesCS5B02G561400	0.89905	3.24559e-06
TraesCS1A02G311400	0.898685	3.74258e-27
TraesCS1A02G249600	0.898672	2.53275e-23
TraesCS5A02G193500	0.898541	0.00323777
TraesCS4D02G059200	0.897217	0.000146411
TraesCS1A02G374300	0.896772	2.53816e-08
TraesCS1A02G333800	0.895818	0.00021763
TraesCS6A02G172200	0.895737	0.000194134
TraesCS1A02G257300	0.895282	4.97203e-18
TraesCS7B02G175200	0.894726	3.57704e-18
TraesCS3B02G372600	0.894499	0.00209557
TraesCS1A02G305700	0.894428	8.1227e-11
TraesCS4B02G056300	0.893155	1.34601e-05
TraesCS5D02G264900	0.892999	0.000237645
TraesCS6B02G260200	0.892983	0.00388353
TraesCS1B02G461600	0.892875	8.97454e-20
TraesCS1A02G302800	0.892597	3.52384e-10
TraesCS6B02G262400	0.89246	8.42586e-20
TraesCS1A02G388700	0.892385	1.53311e-13
TraesCS4A02G203800	0.892376	5.84819e-20
TraesCS5A02G230400	0.89188	1.42749e-15
TraesCS6A02G181000	0.891105	0.00177604
TraesCS7B02G441600	0.891008	0.00429468
TraesCS4A02G488100	0.89089	1.13844e-05
TraesCS2D02G541900	0.890789	2.12867e-08
TraesCS5D02G530800	0.890642	1.47748e-05
TraesCS2B02G444500	0.890512	8.11526e-05
TraesCS1A02G396900	0.89016	1.40423e-09
TraesCS1A02G229900	0.890031	6.1611e-08
TraesCS1A02G289800	0.890013	0.00247797
TraesCS1A02G281400	0.890004	3.64944e-17
TraesCS4B02G070000	0.889633	4.41562e-06
TraesCS5A02G142000	0.889614	7.74323e-12
TraesCS1A02G243000	0.889323	2.32244e-14
TraesCS1A02G287400	0.888995	5.8213e-19
TraesCS1D02G191100	0.888815	0.000101614
TraesCS1A02G409700	0.888768	1.11912e-05
TraesCS1A02G395600	0.888154	1.8125e-12
TraesCS7A02G550300	0.887738	7.6167e-05
TraesCS5D02G163100	0.887725	6.30819e-06
TraesCS1A02G265800	0.887622	1.11131e-54
TraesCS1A02G173800	0.887545	0.000792518
TraesCS1A02G238900	0.88739	2.56874e-19
TraesCS1A02G420500	0.887329	7.39662e-10
TraesCS3D02G081300	0.887212	2.19899e-06
TraesCS2B02G154500	0.886869	8.20531e-08
TraesCS4D02G039200	0.886784	0.000104581
TraesCS1A02G241900	0.886764	1.17097e-09
TraesCS6B02G454500	0.886456	0.000437507
TraesCS7D02G354600	0.885994	0.00666619
TraesCS3B02G300300	0.885909	9.54613e-08
TraesCS4B02G223000	0.885732	0.00216905
TraesCS7B02G212500	0.884346	0.000143686
TraesCS1A02G282700	0.883677	0.00344667
TraesCS7B02G277700	0.883501	1.45066e-05
TraesCS5A02G369300	0.883501	5.46267e-06
TraesCS3D02G076300	0.883327	1.69473e-09
TraesCS7B02G441700	0.883323	5.70013e-05
TraesCS3B02G352300	0.881848	3.28194e-15
TraesCS1A02G402800	0.880947	0.000246449
TraesCS1A02G340700	0.880896	0.00646688
TraesCS1A02G439500	0.880465	1.78211e-14
TraesCS4D02G176300	0.880008	3.31862e-08
TraesCS7A02G309600	0.879945	3.81408e-08
TraesCS2D02G349000	0.879574	0.00503172
TraesCS3B02G236900	0.879412	0.00110097
TraesCS5B02G468800	0.879307	7.94757e-46
TraesCS6B02G404700	0.879171	4.30368e-08
TraesCS2B02G456100	0.878945	1.54822e-15
TraesCS1A02G442500	0.878266	3.98819e-13
TraesCS1A02G404500	0.877633	6.37691e-54
TraesCS4B02G117200	0.877629	3.50415e-07
TraesCS2A02G551600	0.877441	5.00706e-09
TraesCS4A02G246100	0.877107	1.47517e-41
TraesCS6D02G311200	0.876927	6.39296e-14
TraesCS1A02G286900	0.876438	2.75956e-05
TraesCS2A02G571300	0.876377	1.68298e-13
TraesCS1A02G255400	0.876206	3.424e-26
TraesCS1A02G391900	0.876126	0.000425001
TraesCS5D02G237800	0.875836	0.000753755
TraesCS1A02G242900	0.875827	0.00430964
TraesCS5B02G504000	0.875571	3.94412e-09
TraesCS4A02G080600	0.875311	2.84992e-30
TraesCS4A02G255500	0.874745	0.00541512
TraesCS1A02G273100	0.87465	1.3215e-13
TraesCS6A02G271200	0.874623	9.40013e-06
TraesCS1A02G375900	0.874076	0.00170515
TraesCS5B02G294600	0.874065	1.16882e-24
TraesCS5A02G181700	0.873956	0.00153103
TraesCS4D02G012700	0.873677	1.70829e-06
TraesCS1A02G335900	0.873669	1.92244e-06
TraesCS4A02G340600	0.873661	3.74912e-05
TraesCS1A02G266300	0.873586	3.88422e-13
TraesCS3B02G213600	0.872921	2.61156e-25
TraesCS1A02G359400	0.872915	3.14344e-05
TraesCS2A02G302900	0.872386	1.87992e-05
TraesCS2B02G507700	0.871645	7.96188e-05
TraesCS3D02G367600	0.871428	0.00302428
TraesCS1A02G348700	0.871416	2.33278e-11
TraesCS4D02G050700	0.871339	5.11093e-34
TraesCS4B02G229200	0.870971	0.000118623
TraesCS7B02G134200	0.87056	2.89054e-07
TraesCS5D02G328100	0.870019	2.36151e-47
TraesCS3D02G210800	0.869991	8.5342e-09
TraesCS5B02G572700	0.869796	0.000927656
TraesCS5B02G045100	0.869687	3.12155e-07
TraesCS6A02G396300	0.869328	0.00373944
TraesCS5A02G459200	0.869185	8.56461e-31
TraesCS1A02G112700	0.869178	6.12408e-05
TraesCS5A02G236700	0.869155	1.67834e-07
TraesCS5A02G423900	0.86875	7.61988e-07
TraesCS1A02G354600	0.868705	0.00260496
TraesCS1D02G252900	0.868416	1.13009e-22
TraesCS3B02G148100	0.868392	3.4907e-11
TraesCS1A02G158600	0.868381	4.9032e-34
TraesCS4A02G313700	0.868169	0.00146516
TraesCS1A02G251600	0.867856	2.67038e-20
TraesCS6B02G376200	0.866789	5.23574e-36
TraesCS1A02G438600	0.866789	1.25569e-17
TraesCS7A02G041100	0.866769	0.000946567
TraesCS1A02G255900	0.866327	6.96381e-09
TraesCS4D02G173700	0.866227	2.2006e-17
TraesCS4B02G059300	0.865603	2.50173e-19
TraesCS6A02G041900	0.865039	0.00425915
TraesCS7A02G246200	0.864972	2.07425e-13
TraesCS5D02G435800	0.864866	0.0023335
TraesCS1A02G397200	0.864114	0.00406465
TraesCS1A02G281300	0.863475	5.91997e-08
TraesCS3B02G314300	0.863264	3.40255e-13
TraesCS5B02G003600	0.86289	0.00034268
TraesCS1A02G440200	0.862803	7.38053e-14
TraesCS6A02G082900	0.862543	0.00275964
TraesCS1A02G349200	0.86219	6.25457e-12
TraesCS2A02G393900	0.861886	2.66852e-21
TraesCS4D02G192600	0.860474	2.65353e-13
TraesCS2B02G311200	0.860405	0.00489154
TraesCS2B02G401500	0.859389	3.31217e-09
TraesCS7D02G304100	0.858854	0.000222094
TraesCS5B02G219700	0.858625	1.13639e-24
TraesCS1A02G437600	0.858156	0.000143132
TraesCS7A02G506000	0.858112	1.30915e-21
TraesCS1A02G249400	0.857914	1.50075e-14
TraesCS7B02G115900	0.857706	2.34947e-08
TraesCS5A02G321300	0.857637	2.09301e-47
TraesCS5B02G351200	0.857348	4.27901e-12
TraesCS2A02G132300	0.856935	2.54175e-08
TraesCS5D02G126600	0.856758	4.11079e-07
TraesCS1A02G443200	0.856315	3.27064e-06
TraesCS7D02G372200	0.856278	1.99105e-06
TraesCS7B02G176200	0.855982	0.0014847
TraesCS6A02G103300	0.855619	0.00080878
TraesCS1B02G135800	0.855444	2.95238e-25
TraesCS1A02G251400	0.854991	5.86679e-10
TraesCS4D02G235500	0.854718	0.000153458
TraesCS1A02G273900	0.854546	0.000199498
TraesCS1A02G368000	0.854471	3.69484e-07
TraesCS1A02G080500	0.854451	1.3175e-05
TraesCS2A02G254200	0.854407	2.393e-08
TraesCS4D02G088200	0.853599	2.35241e-12
TraesCS1B02G367300	0.85354	0.00209196
TraesCS6A02G401500	0.853504	0.00220285
TraesCS1A02G425000	0.85343	1.05521e-08
TraesCS2D02G391800	0.853263	7.91301e-12
TraesCS1A02G244700	0.853109	8.5438e-09
TraesCS1A02G289900	0.853048	0.000647539
TraesCS7B02G255000	0.852884	2.71815e-10
TraesCS1A02G066400	0.852681	0.000200605
TraesCS5B02G507300	0.852608	6.52675e-07
TraesCS1A02G344000	0.852552	1.31388e-17
TraesCS5B02G294400	0.851951	5.78749e-06
TraesCS4A02G298200	0.851691	5.5102e-12
TraesCS1A02G340200	0.851597	0.00163562
TraesCS7A02G487400	0.851529	0.000571227
TraesCS5B02G262500	0.851452	0.00526591
TraesCS7D02G078700	0.851435	0.00108066
TraesCS5D02G082700	0.851248	0.00265081
TraesCS6B02G401000	0.851128	3.86449e-09
TraesCS1A02G374800	0.850803	1.03815e-12
TraesCS2A02G348800	0.850559	1.18747e-05
TraesCS7D02G309400	0.850397	1.64423e-07
TraesCS4D02G181100	0.850382	3.14013e-05
TraesCS6A02G353700	0.850289	1.02382e-20
TraesCS1A02G150400	0.849529	0.00106747
TraesCS3A02G287400	0.849005	2.91527e-05
TraesCS5B02G572400	0.848616	3.89158e-14
TraesCS3B02G584700	0.847497	1.95964e-07
TraesCS2B02G048200	0.847182	9.9381e-05
TraesCS5B02G350900	0.846066	0.00154585
TraesCS1A02G267300	0.846047	1.23868e-14
TraesCS1A02G330600	0.846016	7.56739e-13
TraesCS6A02G294200	0.845816	0.00196777
TraesCS1D02G082500	0.845571	1.86763e-12
TraesCS5B02G228500	0.845565	1.89367e-06
TraesCS1A02G272200	0.845542	7.45264e-06
TraesCS1D02G335900	0.845422	9.31529e-05
TraesCS6D02G252700	0.845342	7.86215e-06
TraesCS1B02G264900	0.845085	6.82074e-22
TraesCS3D02G223300	0.845049	3.97972e-37
TraesCS1B02G132100	0.844846	1.69449e-18
TraesCS4A02G245300	0.844829	5.82003e-10
TraesCS3D02G334200	0.844754	8.93365e-07
TraesCS3D02G097000	0.844398	2.02653e-10
TraesCS1A02G373100	0.844299	1.61042e-06
TraesCS2D02G512400	0.844108	0.00438321
TraesCS3A02G024200	0.843933	2.24693e-08
TraesCS1A02G122000	0.843744	1.57116e-11
TraesCS1A02G367300	0.843427	1.7948e-07
TraesCS1A02G346800	0.843417	5.31887e-20
TraesCS4D02G083000	0.843274	2.61867e-06
TraesCS4D02G153400	0.843058	1.04473e-06
TraesCS2A02G084800	0.842867	6.63802e-06
TraesCS5B02G465000	0.842189	1.1085e-12
TraesCS1A02G402500	0.842172	2.79099e-10
TraesCS1A02G409800	0.841329	1.02456e-17
TraesCS5D02G118700	0.841154	4.76735e-35
TraesCS7B02G446000	0.840719	0.000232118
TraesCS2D02G114300	0.840704	8.97034e-07
TraesCS5B02G465300	0.840686	8.25287e-12
TraesCS1A02G262200	0.840607	2.90729e-09
TraesCS3A02G426600	0.840496	6.00088e-09
TraesCS5B02G470100	0.839807	1.15776e-10
TraesCS4D02G329400	0.839322	7.15628e-31
TraesCS2B02G193500	0.838971	1.44082e-10
TraesCS2A02G301500	0.838682	7.3388e-12
TraesCS1A02G266900	0.838473	1.07236e-28
TraesCS7A02G087500	0.838387	1.32127e-05
TraesCS1A02G292300	0.838117	6.48927e-09
TraesCS5B02G246600	0.837841	3.96299e-05
TraesCS1A02G381400	0.836996	6.17598e-05
TraesCS7B02G169900	0.836907	5.28587e-08
TraesCS1A02G287600	0.836114	9.09613e-13
TraesCS6B02G400400	0.835704	0.000238305
TraesCS3D02G433700	0.835611	0.00055788
TraesCS2D02G179700	0.835555	3.03097e-06
TraesCS1A02G240000	0.835396	0.00197139
TraesCS4B02G120400	0.835358	3.27018e-08
TraesCS3B02G306600	0.835336	2.65609e-05
TraesCS6A02G098600	0.835336	0.0051187
TraesCS6A02G254100	0.835234	1.48534e-27
TraesCS5A02G024300	0.835137	1.41566e-08
TraesCS5A02G315700	0.834628	2.21889e-08
TraesCS2D02G481700	0.834347	3.88305e-05
TraesCS6B02G280800	0.834296	1.44267e-09
TraesCS1A02G394500	0.833939	2.67211e-05
TraesCS5A02G463700	0.833821	0.000134998
TraesCS2B02G529300	0.83353	3.05213e-08
TraesCS3D02G092900	0.833312	1.37932e-22
TraesCS1A02G246500	0.832628	0.000898074
TraesCS2B02G604800	0.832576	1.48281e-07
TraesCS1A02G254400	0.832111	0.00109968
TraesCS2A02G097400	0.831057	2.63557e-51
TraesCS3B02G096600	0.830851	0.000438194
TraesCS5B02G316300	0.830516	0.00542621
TraesCS1A02G297800	0.830336	1.45582e-06
TraesCS5A02G463400	0.829839	0.00424418
TraesCS1B02G167800	0.829774	1.21868e-09
TraesCS1A02G230400	0.828218	5.10246e-28
TraesCS2A02G237200	0.827191	4.53374e-22
TraesCS6B02G401100	0.827082	2.61005e-10
TraesCS3A02G207900	0.826622	3.74376e-12
TraesCS2D02G552700	0.826294	8.86206e-10
TraesCS3A02G135700	0.825543	0.000325841
TraesCS3A02G528800	0.825197	1.23706e-11
TraesCS4D02G112200	0.825156	4.3089e-34
TraesCS1A02G427500	0.824813	6.93719e-05
TraesCS1A02G378200	0.824723	2.19199e-10
TraesCS1A02G358800	0.824535	1.58282e-06
TraesCS4A02G454800	0.82363	1.08132e-23
TraesCS7D02G055500	0.8235	0.000744182
TraesCS7A02G134000	0.823428	0.00040612
TraesCS3D02G083400	0.823258	1.78299e-08
TraesCS5D02G483900	0.822727	6.84708e-05
TraesCS7A02G277500	0.822365	7.50496e-08
TraesCS4A02G339700	0.822279	0.00166295
TraesCS5B02G358600	0.822214	6.92039e-08
TraesCS3B02G259300	0.82096	4.21258e-40
TraesCS1A02G250900	0.820678	0.000741716
TraesCS2A02G593300	0.820663	0.000689952
TraesCS6B02G414000	0.82051	0.00115035
TraesCS5B02G394300	0.820494	1.33405e-32
TraesCS1A02G185700	0.820256	0.00120826
TraesCS5D02G136700	0.820186	5.3401e-13
TraesCS1A02G413000	0.81985	1.0255e-30
TraesCS6A02G336600	0.819835	4.48639e-05
TraesCS2D02G504900	0.819637	0.000664402
TraesCS1A02G315900	0.818943	1.23108e-05
TraesCS6B02G340400	0.818932	0.00274208
TraesCS5D02G411800	0.81891	5.04752e-09
TraesCS3B02G205800	0.81868	5.95614e-10
TraesCS5D02G479400	0.818552	2.16944e-10
TraesCS1A02G369600	0.818157	1.98049e-17
TraesCS2A02G204500	0.818063	1.24626e-05
TraesCS1A02G441800	0.816762	2.31678e-11
TraesCS6D02G042800	0.816345	1.25872e-09
TraesCS4A02G130300	0.816091	9.69287e-10
TraesCS2D02G443500	0.815755	1.44856e-16
TraesCS2B02G278500	0.815724	0.00206515
TraesCS7D02G306300	0.815412	1.77654e-06
TraesCS1A02G267900	0.815158	1.19655e-06
TraesCS2B02G178400	0.814879	6.4383e-10
TraesCS1A02G275400	0.81479	7.5149e-06
TraesCS6B02G156000	0.813967	0.00103511
TraesCS4A02G175600	0.813736	1.02443e-06
TraesCS2B02G091500	0.813633	0.000136111
TraesCS1D02G155900	0.813151	5.31637e-36
TraesCS1A02G314300	0.812429	2.16559e-13
TraesCS3D02G022100	0.812148	1.96833e-09
TraesCS5D02G228600	0.811898	1.46956e-15
TraesCS7A02G454600	0.811805	8.93294e-06
TraesCS6B02G423200	0.811726	2.73919e-08
TraesCS5A02G198800	0.811293	1.65075e-28
TraesCS2A02G254100	0.811215	5.15276e-05
TraesCS3B02G250900	0.811149	2.32012e-20
TraesCS1A02G260100	0.811146	8.44673e-05
TraesCS1A02G230600	0.811066	2.55629e-07
TraesCS3B02G285700	0.810972	0.0042211
TraesCS6B02G113200	0.810958	8.22341e-12
TraesCS1D02G365400	0.810838	5.93658e-08
TraesCS4D02G253300	0.810381	2.40813e-06
TraesCS7D02G236700	0.810348	8.5191e-06
TraesCS7D02G536900	0.810272	2.62663e-15
TraesCS4A02G268500	0.810013	0.000181388
TraesCS5D02G321800	0.809758	1.46248e-13
TraesCS6B02G194400	0.809672	0.00237575
TraesCS4A02G440100	0.809052	8.89328e-05
TraesCS6B02G262700	0.808943	0.000631293
TraesCS7D02G417700	0.80894	0.000282795
TraesCS6A02G000400	0.808897	1.44838e-11
TraesCS1A02G262400	0.808837	2.88821e-08
TraesCS3A02G494400	0.808353	7.27879e-08
TraesCS1A02G125900	0.807957	0.00339631
TraesCS7A02G371600	0.807923	1.58996e-20
TraesCS2D02G302800	0.807879	2.12846e-06
TraesCS1A02G243300	0.807607	5.82176e-09
TraesCS6A02G223900	0.807424	1.79139e-05
TraesCS1A02G397300	0.807276	2.72709e-16
TraesCS4D02G202500	0.807176	0.000155002
TraesCS3A02G392200	0.807008	4.04626e-11
TraesCS4A02G264500	0.806929	4.25441e-31
TraesCS1A02G407100	0.806889	3.58951e-09
TraesCS1D02G147800	0.80672	9.62315e-08
TraesCS1B02G092000	0.806183	0.00289194
TraesCS2B02G256300	0.80553	4.08069e-15
TraesCS2D02G173300	0.805257	2.01789e-05
TraesCSU02G272300	0.805255	0.00485915
TraesCS1D02G451900	0.804775	6.97606e-41
TraesCS7A02G219300	0.804287	0.00139954
TraesCS3B02G097800	0.804183	7.05743e-06
TraesCS7A02G485300	0.803787	8.43355e-05
TraesCS7A02G273000	0.803562	0.00191931
TraesCS1B02G388900	0.803428	2.64969e-19
TraesCS4B02G022800	0.803195	1.74108e-10
TraesCS2B02G242000	0.803018	0.00277397
TraesCS1A02G288600	0.802907	1.20494e-15
TraesCS6B02G288500	0.802706	1.36727e-05
TraesCS5A02G262200	0.802659	7.95938e-07
TraesCS6A02G218000	0.802543	3.91145e-06
TraesCS1A02G244300	0.802187	2.00594e-06
TraesCS4B02G328200	0.80151	6.16387e-05
TraesCS1A02G428700	0.801443	1.27586e-15
TraesCS4D02G137000	0.800641	0.000188698
TraesCS7D02G093200	0.800561	0.000275512
TraesCS7D02G328300	0.79998	1.04614e-06
TraesCS3B02G153900	0.799237	3.71721e-18
TraesCS1A02G280700	0.798925	3.82676e-05
TraesCS6D02G232300	0.798734	1.07992e-09
TraesCS4A02G455000	0.798628	1.29647e-08
TraesCS1A02G429400	0.798548	1.20523e-15
TraesCS1A02G403200	0.798519	8.79735e-07
TraesCS4A02G384500	0.798518	0.000411338
TraesCS2D02G392800	0.798472	2.51275e-06
TraesCS6A02G063900	0.798341	0.00439341
TraesCS1A02G376100	0.798288	1.85977e-10
TraesCS4A02G224700	0.798263	8.02847e-07
TraesCS1B02G105700	0.798116	3.25801e-06
TraesCS1A02G166100	0.797743	7.06103e-08
TraesCS4B02G102500	0.797712	0.000983025
TraesCS2B02G406600	0.797371	0.00194217
TraesCS4B02G269200	0.797233	3.84605e-16
TraesCS7A02G133300	0.796917	2.87277e-05
TraesCS1B02G001700	0.796324	0.000715574
TraesCS4A02G200600	0.796087	7.34322e-31
TraesCS3D02G441600	0.796042	1.07226e-05
TraesCS3A02G447500	0.795629	0.000266002
TraesCS7B02G213000	0.795156	9.90729e-09
TraesCS6D02G283000	0.794783	1.28216e-08
TraesCS2D02G146500	0.79468	0.00240526
TraesCS5A02G477900	0.794283	0.000121196
TraesCS1A02G302500	0.79424	0.00381154
TraesCS5D02G355900	0.794231	0.00229084
TraesCS3B02G203700	0.794123	1.27639e-28
TraesCS6D02G218200	0.794084	0.000263075
TraesCS1A02G276300	0.793811	1.36439e-07
TraesCS1A02G336000	0.793803	0.000260993
TraesCS5D02G166900	0.793641	5.39745e-19
TraesCS1A02G296300	0.79352	2.97973e-06
TraesCS4D02G236400	0.793291	4.66048e-15
TraesCS1A02G351600	0.792673	0.00274641
TraesCS5B02G419300	0.79266	0.00168817
TraesCS7D02G421800	0.792659	1.32754e-37
TraesCS3A02G408700	0.791473	6.49753e-08
TraesCS4B02G277600	0.791364	3.16903e-08
TraesCS7D02G438700	0.791356	2.25307e-06
TraesCS7D02G492100	0.791342	2.26507e-07
TraesCS7D02G379100	0.791289	0.00238251
TraesCS7D02G293100	0.790856	1.76336e-14
TraesCS4D02G220500	0.790831	7.69299e-17
TraesCS1A02G387900	0.790754	0.000787929
TraesCS6D02G105900	0.790411	2.31512e-09
TraesCS1A02G251500	0.790032	1.93041e-05
TraesCS3B02G402200	0.789712	0.000936387
TraesCS3D02G140900	0.78955	4.29609e-05
TraesCS3D02G390900	0.789499	4.70595e-25
TraesCS4A02G160000	0.789036	3.16848e-06
TraesCS1A02G443000	0.788892	0.000300515
TraesCS1A02G266500	0.788745	0.00222174
TraesCS5D02G204100	0.788327	9.11206e-31
TraesCS2B02G280600	0.7883	3.71449e-31
TraesCS6D02G049600	0.788146	1.98732e-15
TraesCS6B02G323800	0.787862	1.63527e-13
TraesCS2D02G351900	0.787766	5.6396e-10
TraesCS2B02G058000	0.787699	2.31777e-06
TraesCS3A02G406000	0.787655	1.40126e-31
TraesCS1A02G333000	0.787631	1.6546e-05
TraesCS1A02G330100	0.787252	9.02539e-11
TraesCS5D02G237400	0.786747	6.72552e-10
TraesCS7B02G321500	0.786583	2.89613e-05
TraesCS5B02G121300	0.786501	0.0037252
TraesCS4D02G285100	0.786344	2.4842e-17
TraesCS6B02G098300	0.785858	1.36456e-10
TraesCS3B02G356300	0.785707	1.48578e-11
TraesCS1A02G179400	0.78557	0.000817899
TraesCS3D02G413800	0.785435	7.83738e-08
TraesCS5D02G344500	0.785402	2.60627e-05
TraesCS7A02G376200	0.785254	0.000604452
TraesCSU02G002300	0.785039	1.06001e-13
TraesCS5B02G529400	0.784808	3.89011e-06
TraesCS3A02G175800	0.784798	0.00191659
TraesCS5B02G159500	0.784698	7.17185e-16
TraesCS5A02G365300	0.784442	0.00165663
TraesCS1A02G093800	0.783911	5.26134e-28
TraesCS6A02G240700	0.78371	0.000352851
TraesCS3A02G297400	0.783637	5.75192e-05
TraesCS7D02G244800	0.783457	0.000299051
TraesCS1D02G215600	0.783257	0.000140309
TraesCS5D02G234900	0.783017	2.65687e-06
TraesCS2A02G263500	0.782272	4.75059e-06
TraesCS2D02G519500	0.782089	0.00128461
TraesCS4D02G322700	0.781828	1.07699e-36
TraesCS2D02G262400	0.781486	8.05397e-32
TraesCS2A02G378300	0.781159	0.000124867
TraesCS6A02G247700	0.781144	0.000194739
TraesCS6A02G325700	0.780738	0.00026062
TraesCS7D02G226300	0.780689	9.23318e-27
TraesCS4D02G099100	0.780354	0.00190186
TraesCS3B02G449100	0.780268	0.004563
TraesCS5A02G082200	0.779932	1.14143e-17
TraesCS7A02G375700	0.779825	1.33127e-05
TraesCS1A02G411900	0.779814	1.09529e-22
TraesCS5D02G419200	0.779696	5.72036e-20
TraesCS5A02G217000	0.779214	0.00612147
TraesCS3A02G118300	0.778927	2.18907e-06
TraesCS4D02G013300	0.778741	4.30545e-05
TraesCS6D02G288000	0.778062	0.000301433
TraesCS4D02G325200	0.77794	0.00204949
TraesCS3D02G282100	0.777383	2.01846e-22
TraesCS7A02G174700	0.777357	2.48128e-15
TraesCS3B02G174500	0.777302	5.13012e-07
TraesCS3A02G448900	0.777273	1.06442e-07
TraesCS3D02G370400	0.777119	0.000242125
TraesCS3D02G022000	0.777012	9.52206e-05
TraesCS2A02G152400	0.776181	2.16183e-07
TraesCS2D02G093100	0.776177	2.17428e-42
TraesCS3A02G257500	0.775879	1.22953e-12
TraesCS1A02G089500	0.775661	1.71255e-26
TraesCS3A02G135800	0.775541	1.94192e-15
TraesCS1A02G443400	0.775344	1.40844e-09
TraesCS3D02G379700	0.775344	5.43464e-09
TraesCS1A02G325900	0.775173	9.06168e-14
TraesCS2A02G581000	0.77499	0.000283108
TraesCS5B02G523300	0.774464	5.15815e-19
TraesCS2D02G339600	0.77438	9.43058e-05
TraesCS5D02G116600	0.773599	3.02742e-09
TraesCS1A02G268400	0.773449	2.20442e-05
TraesCS5A02G291200	0.773228	4.08843e-06
TraesCS5A02G295100	0.772947	3.30405e-11
TraesCS5D02G447500	0.772906	2.31384e-14
TraesCS5A02G188600	0.772608	0.00154737
TraesCS1A02G250300	0.772587	6.98709e-12
TraesCS6B02G168600	0.772044	0.000249322
TraesCS7B02G000300	0.771739	4.51139e-07
TraesCS4B02G261900	0.771616	6.59967e-09
TraesCS4D02G075500	0.77144	0.00370242
TraesCS2B02G289000	0.770923	5.85251e-10
TraesCS5D02G302700	0.770892	3.47656e-13
TraesCS6B02G351300	0.770832	9.32144e-07
TraesCS1D02G376000	0.770764	8.12108e-26
TraesCS2D02G065300	0.770254	9.19111e-21
TraesCS5D02G204700	0.770059	1.86128e-27
TraesCS7B02G277000	0.76999	1.00691e-19
TraesCS6B02G309900	0.769791	2.97576e-06
TraesCS7A02G228300	0.769343	8.11352e-36
TraesCS7D02G499500	0.768997	5.43216e-06
TraesCS3B02G428700	0.768668	3.35422e-05
TraesCS5D02G470300	0.768532	4.337e-37
TraesCS1A02G379800	0.768492	4.50981e-14
TraesCS4B02G305600	0.768285	0.000891595
TraesCS2B02G234300	0.767868	0.00224306
TraesCS7A02G313000	0.767611	0.00613897
TraesCS2B02G077100	0.767237	3.16418e-05
TraesCS4A02G036400	0.767226	8.51486e-08
TraesCS4A02G472500	0.767221	1.87581e-30
TraesCS4D02G309300	0.767051	0.000199062
TraesCS7D02G343300	0.766932	5.62237e-22
TraesCS2B02G345300	0.766925	8.40874e-06
TraesCS4A02G189000	0.766715	0.000438103
TraesCS4B02G050500	0.766686	4.26481e-33
TraesCS7A02G463300	0.76624	0.00222431
TraesCS1A02G308100	0.76621	8.88678e-12
TraesCS1A02G366800	0.766023	0.00551691
TraesCS5A02G238000	0.765826	4.11113e-10
TraesCS3A02G083700	0.765455	0.000406672
TraesCS3B02G439600	0.765021	1.65532e-36
TraesCS6B02G309800	0.765002	1.85488e-24
TraesCS3B02G453500	0.764584	4.2082e-08
TraesCS7B02G373000	0.764455	2.52966e-44
TraesCS1A02G270300	0.764333	2.08103e-13
TraesCS1A02G343300	0.763969	1.69484e-08
TraesCS3B02G116700	0.763675	2.9973e-09
TraesCS3A02G283700	0.763663	9.13714e-07
TraesCS5D02G502900	0.763602	6.82596e-07
TraesCS1B02G443700	0.763396	0.000915814
TraesCS5B02G389400	0.763191	9.21746e-08
TraesCS1A02G248400	0.763029	6.44521e-10
TraesCS3D02G072000	0.762916	1.524e-05
TraesCS5B02G271700	0.762881	6.33801e-08
TraesCS7D02G277500	0.762768	4.71426e-35
TraesCS1A02G400200	0.762759	1.76521e-11
TraesCS7A02G235700	0.762711	6.04571e-08
TraesCS5B02G197400	0.762468	1.27889e-30
TraesCS5A02G177700	0.761951	0.000145734
TraesCS7A02G373900	0.761938	0.00147452
TraesCS1A02G437500	0.761845	2.89395e-08
TraesCS1A02G315600	0.761764	5.7663e-05
TraesCS4B02G114600	0.761654	1.79624e-09
TraesCS2B02G605800	0.761325	4.87079e-08
TraesCS1A02G236600	0.761263	3.55458e-09
TraesCS1B02G165000	0.761209	0.0053589
TraesCS5D02G302600	0.761071	1.49971e-19
TraesCS7D02G419400	0.760803	8.31369e-06
TraesCS2B02G302400	0.760648	3.0899e-20
TraesCS6B02G217000	0.759993	4.76562e-08
TraesCS5D02G090400	0.759735	1.25903e-16
TraesCS6B02G373200	0.758539	0.000116773
TraesCS1A02G149800	0.758398	2.03896e-10
TraesCS4D02G186800	0.758397	2.29325e-05
TraesCS1A02G298700	0.758336	6.26144e-06
TraesCS6D02G336000	0.75822	7.16089e-14
TraesCS6D02G264000	0.75817	3.969e-05
TraesCS7A02G121400	0.75798	0.00014423
TraesCS7A02G197300	0.757879	0.000331717
TraesCS5A02G392100	0.757864	5.99634e-05
TraesCS5B02G002600	0.757852	2.1261e-24
TraesCS2D02G479100	0.757121	0.000572445
TraesCS2D02G571300	0.756884	0.00127115
TraesCS4A02G028400	0.756708	6.43017e-11
TraesCS5D02G187100	0.756679	0.000113672
TraesCS3D02G286600	0.755753	0.00180626
TraesCS4B02G243500	0.75564	4.264e-08
TraesCS4A02G351900	0.755505	5.35428e-06
TraesCS3B02G279700	0.755409	3.29296e-22
TraesCS6A02G260400	0.754957	0.00546638
TraesCS5B02G534400	0.754926	4.0977e-05
TraesCS1A02G380900	0.754615	5.35139e-09
TraesCS1D02G239000	0.754329	2.38423e-10
TraesCS3D02G151400	0.753397	0.00106263
TraesCS3B02G373400	0.753378	1.12226e-10
TraesCS5D02G506800	0.753235	0.00531548
TraesCS6B02G234900	0.753143	2.61313e-06
TraesCSU02G057000	0.753075	4.51158e-10
TraesCS7D02G082600	0.752571	0.000597622
TraesCS5A02G376900	0.752515	0.00111714
TraesCS5D02G329100	0.75235	1.61604e-11
TraesCS6B02G240900	0.752241	3.23563e-06
TraesCS3D02G136800	0.752055	1.37527e-12
TraesCS6B02G402300	0.751472	4.32827e-15
TraesCS1A02G313700	0.751394	0.000250988
TraesCS4B02G243100	0.751313	5.07574e-08
TraesCS3B02G315800	0.750615	2.80991e-16
TraesCS3D02G251900	0.750399	4.23454e-14
TraesCS1A02G370800	0.75036	8.73414e-07
TraesCS3A02G100000	0.750224	7.55654e-08
TraesCS2A02G322500	0.74955	3.13888e-08
TraesCS2A02G130200	0.749057	6.4769e-06
TraesCS2B02G109700	0.748921	4.33183e-36
TraesCS4B02G325800	0.748868	6.22907e-27
TraesCS1A02G242600	0.748755	1.4514e-06
TraesCS1B02G200600	0.748303	8.60429e-05
TraesCS2B02G478300	0.748289	0.00262178
TraesCS7D02G132900	0.747968	6.55952e-05
TraesCS3B02G448100	0.747913	3.55065e-06
TraesCS6B02G216900	0.747647	6.48515e-18
TraesCS7D02G384800	0.747613	0.0053728
TraesCS2A02G456200	0.747606	0.000553894
TraesCS7A02G335600	0.747584	1.52491e-19
[truncated: 8,758 more rows]

## Sheet: Supplementary Data 2
Supplementary Data 2. 5971 DEGs that contain the W-box motif generated from Supplementary Data 1.
Gene ID	log2FC(dWT vs dKO)	P value(dWT vs dKO)	Description	Oryza sativa	Arabidopsis thaliana
TraesCS6B02G091100	7.6885	5.77704e-10	S-(+)-linalool synthase, chloroplastic [UniProtKB/Swiss-Prot:Q6ZH94]	Os02g0121700	NA
TraesCS2D02G138400	7.00699	4.18565e-08	Tau-cadinol synthase [UniProtKB/Swiss-Prot:Q5GJ59]	NA	NA
TraesCS5D02G488300	6.64791	3.43252e-07	Acetylserotonin O-methyltransferase 1 [UniProtKB/Swiss-Prot:Q6EPG8]	Os06g0281300	NA
TraesCS5D02G487900	6.12409	1.41689e-06	Dolabradiene monooxygenase [UniProtKB/Swiss-Prot:A0A1D6GQ67]	NA	NA
TraesCS1B02G019800	5.9626	1.76621e-05	Putative 12-oxophytodienoate reductase 5 [UniProtKB/Swiss-Prot:Q69TI0]	Os06g0215600	AT1G76690
TraesCS6B02G074200	5.71369	0.000111981	Laccase-15 [UniProtKB/Swiss-Prot:Q339K6]	NA	NA
TraesCS2A02G578200	5.56734	0.000123369	Probable glutathione S-transferase [UniProtKB/Swiss-Prot:Q03666]	Os07g0152700	NA
TraesCSU02G263300	5.47751	0.000167822	NA	NA	NA
TraesCS3D02G475200	5.42028	6.13635e-12	Glucan endo-1,3-beta-glucosidase, acidic isoform [UniProtKB/Swiss-Prot:P49237]	Os01g0940700	NA
TraesCS3B02G526000	5.3528	0.000331452	Glucan endo-1,3-beta-glucosidase, acidic isoform [UniProtKB/Swiss-Prot:P49237]	Os01g0940700	NA
TraesCS5D02G080200	5.33622	6.18243e-05	NA	Os12g0529200	NA
TraesCS2D02G518200	5.2417	0.000518648	Tryptophan decarboxylase 1 [UniProtKB/Swiss-Prot:Q6ZJK7]	Os08g0140300	AT2G20340
TraesCS6A02G005100	5.21846	0.000569728	Pathogen-related protein [UniProtKB/Swiss-Prot:P16273]	Os01g0248500	NA
TraesCS6B02G037600	5.14082	0.000774746	Wall-associated receptor kinase 5 [UniProtKB/Swiss-Prot:Q9LMN7]	Os02g0633066	NA
TraesCS1B02G320300	5.1171	0.000199366	NA	NA	NA
TraesCSU02G265700	5.0496	1.41449e-05	NA	NA	NA
TraesCS7D02G161200	5.03468	3.58257e-31	Pathogenesis-related protein PRB1-3 [UniProtKB/Swiss-Prot:P35793]	Os01g0382400	AT2G14610
TraesCS3D02G057400	5.0328	0.000991407	NA	NA	NA
TraesCS7D02G119100	4.99396	0.00188564	NA	NA	NA
TraesCS1A02G297700	4.93906	0.00150945	Cation/H(+) antiporter 15 [UniProtKB/Swiss-Prot:Q9SIT5]	Os05g0473401	AT5G58460
TraesCS5B02G209000	4.83147	0.000478421	GDSL esterase/lipase At5g45910 [UniProtKB/Swiss-Prot:Q9FJ45]	Os05g0506800	NA
TraesCS5B02G415400	4.82538	0.00087179	Transcription factor JUNGBRUNNEN 1 [UniProtKB/Swiss-Prot:Q9SK55]	Os03g0777000	NA
TraesCS5D02G488400	4.8034	0.0025632	Acetylserotonin O-methyltransferase 1 [UniProtKB/Swiss-Prot:Q6EPG8]	Os06g0281300	NA
TraesCS5A02G183300	4.77906	5.90662e-20	Pathogenesis-related protein PRB1-3 [UniProtKB/Swiss-Prot:P35793]	Os01g0382400	AT2G14610
TraesCS7B02G354400	4.76386	0.00316718	Cytochrome P450 87A3 [UniProtKB/Swiss-Prot:Q7XU38]	Os04g0570500	AT1G12740
TraesCS6A02G058300	4.74201	0.00449495	Laccase-15 [UniProtKB/Swiss-Prot:Q339K6]	NA	NA
TraesCSU02G023100	4.74012	0.00450199	Amino acid transporter AVT1C [UniProtKB/Swiss-Prot:F4IUW3]	Os02g0101000	AT2G39130
TraesCSU02G264900	4.58204	1.23541e-07	NA	NA	NA
TraesCS3A02G489500	4.57655	0.00124384	Protein IRON-RELATED TRANSCRIPTION FACTOR 2 [UniProtKB/Swiss-Prot:A2WZ60]	Os01g0952800	NA
TraesCS7A02G558500	4.50184	1.00821e-18	Pathogenesis-related protein 1C [UniProtKB/Swiss-Prot:P32938]	NA	NA
TraesCS1D02G052500	4.45701	0.00192963	Tryptophan decarboxylase 1 [UniProtKB/Swiss-Prot:Q6ZJK7]	Os08g0140300	AT2G20340
TraesCSU02G253400	4.4168	0.000463822	Germin-like protein 8-5 [UniProtKB/Swiss-Prot:Q6YZA6]	Os08g0189400	AT5G39110
TraesCSU02G173800	4.39949	7.96151e-09	NA	NA	NA
TraesCS1A02G355300	4.38821	6.21461e-09	Wheatwin-1 [UniProtKB/Swiss-Prot:O64392]	Os11g0592000	AT3G04720
TraesCSU02G258200	4.37928	1.0215e-08	NA	NA	NA
TraesCS4A02G031400	4.35753	0.00294125	NA	Os03g0162725	NA
TraesCS6B02G473800	4.34119	0.000381401	Thaumatin-like protein [UniProtKB/Swiss-Prot:P31110]	Os12g0629600	NA
TraesCSU02G269400	4.27997	0.00399872	Protein TAR1 [UniProtKB/Swiss-Prot:Q6CQE5]	NA	NA
TraesCSU02G146600	4.19011	2.53146e-05	Thaumatin-like protein [UniProtKB/Swiss-Prot:P31110]	Os12g0629600	NA
TraesCS7A02G198800	4.16598	0.00518337	Pathogenesis-related protein PRMS [UniProtKB/Swiss-Prot:Q00008]	Os10g0191300	AT2G14580
TraesCS5D02G023700	4.11662	8.00303e-18	Protein TAR1 [UniProtKB/Swiss-Prot:Q6CQE5]	NA	NA
TraesCS2D02G484200	4.11188	2.15786e-11	Probable metal-nicotianamine transporter YSL6 [UniProtKB/Swiss-Prot:Q7XRV2]	Os04g0390500	AT3G27020
TraesCS4D02G032000	4.06248	1.3299e-35	Oxalate oxidase GF-2.8 [UniProtKB/Swiss-Prot:P15290]	Os03g0694000	NA
TraesCS5B02G485200	4.06132	0.00117304	3-hydroxyindolin-2-one monooxygenase [UniProtKB/Swiss-Prot:Q43250]	Os08g0106000	NA
TraesCS3B02G525000	4.00035	7.86633e-05	Glucan endo-1,3-beta-glucosidase, acidic isoform [UniProtKB/Swiss-Prot:P49237]	Os01g0940700	NA
TraesCSU02G249800	3.97819	3.9601e-14	NA	NA	NA
TraesCS1A02G001000	3.85184	1.77946e-22	NA	NA	NA
TraesCSU02G260600	3.82384	2.28104e-05	NA	NA	NA
TraesCS3B02G185500	3.8054	2.71081e-06	Photosystem I P700 chlorophyll a apoprotein A1 [UniProtKB/Swiss-Prot:P58311]	CAA33996	ATCG00350
TraesCSU02G263900	3.76907	7.96829e-10	NA	NA	NA
TraesCSU02G258900	3.76253	3.88371e-22	NA	NA	NA
TraesCSU02G271300	3.73548	5.18494e-07	NA	NA	NA
TraesCS2A02G509100	3.68576	0.00401136	NADH-ubiquinone oxidoreductase chain 4 [UniProtKB/Swiss-Prot:P27572]	BAC19875	ATMG00580
TraesCSU02G263200	3.6488	0.00079546	NA	NA	NA
TraesCS4A02G279300	3.62536	8.03228e-11	Oxalate oxidase GF-2.8 [UniProtKB/Swiss-Prot:P15290]	Os03g0694000	AT1G74820
TraesCSU02G265400	3.61456	8.98162e-05	NA	NA	NA
TraesCS1A02G001200	3.56973	0.000926535	NA	NA	NA
TraesCS7D02G255400	3.56932	3.71402e-05	NA	NA	NA
TraesCS5A02G555700	3.53831	0.00108116	NA	NA	NA
TraesCS1B02G087000	3.51405	1.32624e-16	NA	NA	NA
TraesCS7D02G119300	3.501	3.60654e-05	NA	NA	NA
TraesCS4B02G377100	3.49515	1.05736e-13	Germin-like protein 8-5 [UniProtKB/Swiss-Prot:Q6YZA6]	Os08g0189400	AT5G39110
TraesCSU02G256700	3.47662	1.43238e-15	NA	NA	NA
TraesCSU02G262400	3.42859	6.65027e-12	NA	NA	NA
TraesCS4D02G031700	3.41594	4.48382e-92	Oxalate oxidase GF-2.8 [UniProtKB/Swiss-Prot:P15290]	Os03g0694000	AT1G18980
TraesCS5D02G050200	3.4122	2.81061e-12	Protein WIR1B [UniProtKB/Swiss-Prot:Q01481]	NA	NA
TraesCS1A02G000200	3.40632	1.56249e-12	NA	NA	NA
TraesCSU02G056800	3.40602	0.00268232	Uncharacterized protein ycf68 [UniProtKB/Swiss-Prot:P12173]	CAA33945	NA
TraesCS1A02G000400	3.37531	5.69132e-16	NA	NA	NA
TraesCS6A02G225400	3.37011	0.000368368	Wall-associated receptor kinase 2 [UniProtKB/Swiss-Prot:Q9LMP1]	Os02g0623932	AT4G28670
TraesCSU02G248500	3.35614	8.58067e-09	NA	NA	NA
TraesCSU02G260700	3.35071	1.22419e-16	Protein TAR1 [UniProtKB/Swiss-Prot:Q6CQE5]	NA	NA
TraesCS5D02G484900	3.34503	2.68448e-06	indolin-2-one monooxygenase [UniProtKB/Swiss-Prot:Q43255]	Os08g0106000	NA
TraesCS1A02G001100	3.33256	8.6644e-20	NA	NA	NA
TraesCSU02G269600	3.327	2.50337e-21	NA	NA	NA
TraesCSU02G265800	3.29621	0.000815083	NA	NA	NA
TraesCS4D02G031800	3.29402	2.44359e-47	Oxalate oxidase GF-2.8 [UniProtKB/Swiss-Prot:P15290]	Os03g0694000	NA
TraesCS4D02G031900	3.2864	5.72427e-58	Oxalate oxidase GF-2.8 [UniProtKB/Swiss-Prot:P15290]	Os03g0694000	AT1G18980
TraesCSU02G263100	3.27786	1.27381e-13	NA	NA	NA
TraesCSU02G242000	3.26979	1.9039e-08	NA	NA	NA
TraesCS1A02G001500	3.25944	1.6505e-06	Protein TAR1 [UniProtKB/Swiss-Prot:Q6CQE5]	NA	NA
TraesCS3D02G520200	3.20779	2.99848e-07	NA	Os01g0969200	NA
TraesCSU02G145700	3.19799	3.5933e-10	Germin-like protein 8-5 [UniProtKB/Swiss-Prot:Q6YZA6]	Os08g0189400	AT5G39110
TraesCS7A02G059500	3.1951	0.00125208	Tryptophan decarboxylase 1 [UniProtKB/Swiss-Prot:Q6ZJK7]	Os08g0140300	AT2G20340
TraesCS5D02G488500	3.13139	6.26947e-08	indole-2-monooxygenase [UniProtKB/Swiss-Prot:Q43257]	NA	NA
TraesCS6B02G256200	3.10514	0.000491842	Wall-associated receptor kinase 2 [UniProtKB/Swiss-Prot:Q9LMP1]	Os02g0624100	AT4G28670
TraesCS7D02G119200	3.10046	1.31472e-10	Protein TAR1 [UniProtKB/Swiss-Prot:Q6CQE5]	NA	NA
TraesCS4B02G377200	3.09032	7.72148e-05	Germin-like protein 8-5 [UniProtKB/Swiss-Prot:Q6YZA6]	Os08g0189400	AT5G39110
TraesCS5B02G429900	3.08867	3.36886e-14	Indole-3-acetaldehyde oxidase [UniProtKB/Swiss-Prot:O23888]	Os03g0790900	AT3G43600
TraesCS1A02G339200	3.08332	0.00180321	NA	NA	NA
TraesCS4D02G030700	3.06413	8.09722e-35	Oxalate oxidase 2 [UniProtKB/Swiss-Prot:P45851]	Os03g0694000	AT1G74820
TraesCSU02G271600	3.03727	0.0004042	NA	NA	NA
TraesCS6D02G091800	3.03715	0.00296006	NA	NA	NA
TraesCS5A02G004700	3.03181	6.1166e-37	Obtusifoliol 14-alpha demethylase [UniProtKB/Swiss-Prot:P93846]	Os12g0640200	NA
TraesCS5A02G004600	3.02811	0.000730063	Obtusifoliol 14-alpha demethylase [UniProtKB/Swiss-Prot:P93846]	Os12g0582700	NA
TraesCS7A02G198900	3.00696	1.26282e-12	Pathogenesis-related protein PRMS [UniProtKB/Swiss-Prot:Q00008]	Os10g0191300	AT2G14580
TraesCS6A02G009800	2.99798	0.000637171	NA	NA	NA
TraesCSU02G262100	2.96768	3.13484e-06	NA	NA	NA
TraesCS3A02G272800	2.96265	0.00302478	ABC transporter G family member 32 [UniProtKB/Swiss-Prot:Q8LQX2]	Os01g0724400	AT1G15520
TraesCS5D02G010900	2.95134	5.16763e-06	Photosystem I P700 chlorophyll a apoprotein A1 [UniProtKB/Swiss-Prot:P58311]	CAA33996	ATCG00350
TraesCS6D02G139500	2.95036	0.00383604	NADH dehydrogenase [ubiquinone] iron-sulfur protein 2 [UniProtKB/Swiss-Prot:Q36450]	NA	ATMG00510
TraesCS5B02G535400	2.91029	2.48137e-05	Putative disease resistance protein RGA1 [UniProtKB/Swiss-Prot:Q7XA42]	NA	NA
TraesCS4D02G229500	2.9053	0.00130525	NA	NA	NA
TraesCSU02G247700	2.90132	0.00152823	NA	NA	NA
TraesCS6B02G117700	2.88022	2.21335e-05	NA	NA	NA
TraesCS5D02G012000	2.86343	3.36898e-35	Obtusifoliol 14-alpha demethylase [UniProtKB/Swiss-Prot:P93846]	NA	NA
TraesCS4B02G033100	2.8158	2.06653e-65	Oxalate oxidase 2 [UniProtKB/Swiss-Prot:P45851]	Os03g0694000	AT1G74820
TraesCS2B02G442700	2.77057	1.60245e-10	Pathogenesis-related protein 1 [UniProtKB/Swiss-Prot:Q05736]	Os03g0300400	NA
TraesCS1A02G377000	2.76632	0.00355313	NA	NA	NA
TraesCS7D02G119000	2.76478	2.82024e-05	NA	NA	NA
TraesCS4A02G279200	2.75382	9.33908e-06	Oxalate oxidase GF-2.8 [UniProtKB/Swiss-Prot:P15290]	Os03g0694000	AT1G74820
TraesCS2D02G552100	2.72702	1.0973e-37	Wheatwin-1 [UniProtKB/Swiss-Prot:O64392]	Os11g0592000	AT3G04720
TraesCS2A02G532600	2.72225	0.000206086	Receptor-like serine/threonine-protein kinase SD1-8 [UniProtKB/Swiss-Prot:O81905]	Os04g0634400	NA
TraesCS5A02G494400	2.7093	0.00345333	MLO protein homolog 1 [UniProtKB/Swiss-Prot:O49873]	Os03g0129100	AT2G17430
TraesCSU02G271400	2.70426	0.000183718	NA	NA	NA
TraesCS1D02G087700	2.70358	0.00218442	Serine carboxypeptidase 2 [UniProtKB/Swiss-Prot:P08819]	Os05g0158500	AT3G07990
TraesCS5A02G544400	2.70172	0.000121668	Germin-like protein 8-5 [UniProtKB/Swiss-Prot:Q6YZA6]	Os08g0189400	AT5G39150
TraesCS4A02G245000	2.69692	0.00448002	NA	NA	NA
TraesCS1A02G000100	2.67153	0.000276883	NA	NA	NA
TraesCS5A02G004800	2.66924	4.21828e-07	3beta-hydroxysteroid-dehydrogenase/decarboxylase isoform 1 [UniProtKB/Swiss-Prot:Q9FX01]	Os03g0404800	NA
TraesCS1D02G182600	2.66558	3.49577e-05	Photosystem II CP47 reaction center protein [UniProtKB/Swiss-Prot:P10900]	CAA33973	ATCG00680
TraesCS7B02G105100	2.66387	4.38093e-19	Pathogenesis-related protein PRMS [UniProtKB/Swiss-Prot:Q00008]	Os10g0191300	AT2G14580
TraesCS2D02G101200	2.66141	0.00060223	Ricin B-like lectin R40G2 [UniProtKB/Swiss-Prot:Q6Z4N6]	Os07g0683900	NA
TraesCS4B02G033300	2.65954	5.70312e-34	Oxalate oxidase GF-2.8 [UniProtKB/Swiss-Prot:P15290]	Os03g0694000	AT1G74820
TraesCS5D02G011800	2.65903	2.79859e-07	Cycloartenol synthase [UniProtKB/Swiss-Prot:Q6Z2X6]	Os02g0139700	AT2G07050
TraesCSU02G265300	2.65408	2.60904e-05	NA	NA	NA
TraesCS6A02G162900	2.63268	1.15692e-06	Peroxygenase [UniProtKB/Swiss-Prot:A0A1I9R3Y5]	Os06g0254300	NA
TraesCSU02G266300	2.61506	0.000176442	NA	NA	NA
TraesCS4D02G032100	2.60185	1.09566e-05	Oxalate oxidase GF-2.8 [UniProtKB/Swiss-Prot:P15290]	Os03g0694000	NA
TraesCS7A02G075600	2.59361	2.21137e-06	Enolase 1 [UniProtKB/Swiss-Prot:P26301]	Os06g0136600	AT2G36530
TraesCS5D02G436000	2.58835	1.81925e-32	Probable aldehyde oxidase 3 [UniProtKB/Swiss-Prot:Q852M2]	Os03g0790900	AT3G43600
TraesCS7D02G526600	2.58716	0.00204083	Disease resistance protein RGA5 [UniProtKB/Swiss-Prot:F7J0N2]	NA	NA
TraesCS4B02G033600	2.57689	6.17765e-11	Oxalate oxidase 2 [UniProtKB/Swiss-Prot:P45851]	Os03g0693800	AT1G74820
TraesCS1A02G384800	2.53543	6.28665e-05	NA	NA	NA
TraesCSU02G266700	2.50915	0.0012396	NA	NA	NA
TraesCS7D02G494100	2.5054	2.6861e-16	NA	Os06g0650900	NA
TraesCS4A02G181900	2.50046	2.65808e-14	Oxalate oxidase GF-2.8 [UniProtKB/Swiss-Prot:P15290]	Os03g0694000	NA
TraesCS6A02G015500	2.49965	1.58409e-11	Bisdemethoxycurcumin synthase [UniProtKB/Swiss-Prot:Q8LIL0]	Os05g0212900	NA
TraesCS7B02G215300	2.49112	4.76917e-05	Putative cyclin-dependent kinase F-2 [UniProtKB/Swiss-Prot:Q2QSL4]	Os08g0112500	NA
TraesCS2B02G355900	2.48646	0.000343499	Probable aldo-keto reductase 3 [UniProtKB/Swiss-Prot:A2XRZ6]	Os04g0339400	AT1G60710
TraesCS4A02G296300	2.45601	2.26835e-33	Zeamatin [UniProtKB/Swiss-Prot:P33679]	Os03g0663500	AT4G11650
TraesCS1A02G405800	2.4539	0.00191176	Sugar transporter ERD6-like 6 [UniProtKB/Swiss-Prot:Q9FRL3]	Os05g0567800	AT1G19450
TraesCSU02G222000	2.44405	0.000276078	Germin-like protein 8-5 [UniProtKB/Swiss-Prot:Q6YZA6]	Os08g0189400	AT5G39110
TraesCS1D02G355100	2.42363	1.11444e-11	Wheatwin-1 [UniProtKB/Swiss-Prot:O64392]	Os11g0592000	AT3G04720
TraesCS5B02G366900	2.41981	0.00234827	Wall-associated receptor kinase 3 [UniProtKB/Swiss-Prot:Q9LMN8]	Os09g0561600	NA
TraesCS4A02G400600	2.38635	1.23722e-17	Probable inactive purple acid phosphatase 27 [UniProtKB/Swiss-Prot:Q5MAU8]	Os08g0531000	AT5G50400
TraesCSU02G128500	2.37629	0.00670634	Germin-like protein 8-5 [UniProtKB/Swiss-Prot:Q6YZA6]	Os08g0189400	AT5G39110
TraesCS3D02G067200	2.36503	0.000343364	NA	NA	NA
TraesCSU02G261800	2.36272	0.00112596	NA	NA	NA
TraesCS6B02G196600	2.33966	0.000500874	NA	Os02g0193300	NA
TraesCS1D02G207100	2.3333	7.55678e-23	Chitinase 8 [UniProtKB/Swiss-Prot:Q7XCK6]	Os10g0542900	AT3G12500
TraesCS6B02G022500	2.31884	3.25008e-16	Bisdemethoxycurcumin synthase [UniProtKB/Swiss-Prot:Q8LIL0]	Os05g0212900	NA
TraesCS6B02G283800	2.29288	2.54095e-07	Iron-phytosiderophore transporter YSL15 [UniProtKB/Swiss-Prot:Q6H3Z3]	Os02g0650300	AT5G53550
TraesCS4D02G031600	2.29004	1.01983e-30	Oxalate oxidase GF-2.8 [UniProtKB/Swiss-Prot:P15290]	Os03g0694000	AT1G74820
TraesCS3A02G435200	2.28226	2.67799e-08	G-type lectin S-receptor-like serine/threonine-protein kinase At2g19130 [UniProtKB/Swiss-Prot:O64477]	Os04g0225250	NA
TraesCS7B02G104900	2.26034	2.74532e-07	Pathogenesis-related protein PRMS [UniProtKB/Swiss-Prot:Q00008]	Os10g0191300	NA
TraesCS4B02G377400	2.2547	0.000210799	Germin-like protein 8-5 [UniProtKB/Swiss-Prot:Q6YZA6]	Os08g0189400	AT5G39110
TraesCS6B02G355700	2.24048	1.78714e-11	1-aminocyclopropane-1-carboxylate oxidase 1 [UniProtKB/Swiss-Prot:A2Z1W9]	Os02g0771600	AT1G05010
TraesCS2A02G484200	2.23063	8.18968e-06	Probable metal-nicotianamine transporter YSL6 [UniProtKB/Swiss-Prot:Q7XRV2]	Os04g0390500	AT3G27020
TraesCS2D02G139100	2.22462	1.03795e-23	Tau-cadinol synthase [UniProtKB/Swiss-Prot:Q5GJ59]	NA	NA
TraesCS3D02G480100	2.22302	0.00384755	Amino-acid permease BAT1 homolog [UniProtKB/Swiss-Prot:B9EXZ6]	Os01g0945300	AT2G01170
TraesCS5B02G068100	2.19973	0.000295532	Probable LRR receptor-like serine/threonine-protein kinase At3g47570 [UniProtKB/Swiss-Prot:C0LGP4]	Os11g0208900	NA
TraesCSU02G051900	2.19231	8.1411e-05	Glucan endo-1,3-beta-glucosidase GI [UniProtKB/Swiss-Prot:P34742]	Os01g0947000	NA
TraesCS3B02G282500	2.1425	2.5837e-46	Oxalate oxidase 2 [UniProtKB/Swiss-Prot:P45851]	Os03g0694000	AT1G18980
TraesCS7D02G089800	2.13845	3.67503e-07	Anthocyanin 5-aromatic acyltransferase [UniProtKB/Swiss-Prot:Q9ZWR8]	Os06g0145600	NA
TraesCS3B02G282400	2.13543	8.2492e-22	Oxalate oxidase 2 [UniProtKB/Swiss-Prot:P45851]	Os03g0694000	AT1G18980
TraesCS7B02G455700	2.12246	0.000399472	Alpha carbonic anhydrase 5 [UniProtKB/Swiss-Prot:F4HUC4]	Os08g0470200	NA
TraesCS1A02G234600	2.11738	1.77124e-144	Lichenase-2 (Fragment) [UniProtKB/Swiss-Prot:P12257]	Os05g0375400	NA
TraesCS1D02G363300	2.11722	4.69645e-07	Probable WRKY transcription factor 51 [UniProtKB/Swiss-Prot:Q93WU9]	Os05g0537100	NA
TraesCS3A02G009300	2.11624	0.000312829	Disease resistance protein RGA5 [UniProtKB/Swiss-Prot:F7J0N2]	NA	NA
TraesCS1D02G179900	2.10901	4.69544e-08	Photosystem II protein D1 [UniProtKB/Swiss-Prot:P12463]	CAA34007	ATCG00020
TraesCS7B02G321300	2.10392	0.00572623	Basic leucine zipper 19 [UniProtKB/Swiss-Prot:Q8VY76]	NA	NA
TraesCS2B02G159800	2.08425	0.000243031	Tau-cadinol synthase [UniProtKB/Swiss-Prot:Q5GJ59]	NA	NA
TraesCS7A02G101900	2.08422	3.0898e-05	Probable inactive purple acid phosphatase 27 [UniProtKB/Swiss-Prot:Q5MAU8]	Os08g0531000	AT5G50400
TraesCS2B02G627900	2.07216	0.00421005	NA	NA	NA
TraesCS7D02G119400	2.06631	0.00285566	NA	NA	NA
TraesCS7A02G055800	2.06145	1.36867e-13	7-deoxyloganetin glucosyltransferase [UniProtKB/Swiss-Prot:F8WKW1]	Os08g0404000	AT1G22360
TraesCS2A02G177200	2.05668	0.000133542	Putative anthocyanidin reductase [UniProtKB/Swiss-Prot:Q5XLY0]	Os07g0601100	NA
TraesCS2D02G081000	2.04694	0.000845823	Probable metal-nicotianamine transporter YSL6 [UniProtKB/Swiss-Prot:Q7XRV2]	Os04g0390500	AT3G27020
TraesCS4A02G439000	2.04664	0.000119228	Oligopeptide transporter 7 [UniProtKB/Swiss-Prot:O82485]	Os06g0125400	AT4G10770
TraesCS6A02G002900	2.04396	9.70292e-05	Chlorophyllase-1 [UniProtKB/Swiss-Prot:O22527]	NA	NA
TraesCS4B02G377000	2.03261	0.00189539	Germin-like protein 8-5 [UniProtKB/Swiss-Prot:Q6YZA6]	Os08g0189400	AT5G39110
TraesCS3B02G359800	2.02757	2.92523e-05	Probable inactive purple acid phosphatase 27 [UniProtKB/Swiss-Prot:Q5MAU8]	Os01g0800500	NA
TraesCS1A02G250000	2.0195	2.31322e-12	Basic endochitinase A [UniProtKB/Swiss-Prot:Q9FRV1]	Os05g0399300	AT3G12500
TraesCS2D02G364500	2.01896	0.00047137	Peroxygenase [UniProtKB/Swiss-Prot:Q7FAX1]	Os04g0511200	AT2G33380
TraesCS7D02G412900	2.01318	1.13649e-05	Zinc transporter 10 [UniProtKB/Swiss-Prot:Q5Z653]	NA	NA
TraesCS1A02G299200	1.99759	4.00299e-11	Protein NUCLEAR FUSION DEFECTIVE 4 [UniProtKB/Swiss-Prot:F4I9E1]	Os05g0475700	AT2G30300
TraesCS4A02G328500	1.98956	0.00165974	Pentatricopeptide repeat-containing protein At2g35030, mitochondrial [UniProtKB/Swiss-Prot:O64766]	Os03g0849700	NA
TraesCS5D02G049200	1.98231	4.23306e-14	Protein WIR1A [UniProtKB/Swiss-Prot:Q01482]	NA	NA
TraesCS4D02G273300	1.9791	0.00173286	NA	Os03g0162725	NA
TraesCS1A02G341200	1.95147	5.51635e-22	NA	Os05g0520600	NA
TraesCS3D02G390700	1.94598	6.48592e-06	NA	Os01g0898800	AT2G43340
TraesCS2B02G360300	1.94089	6.22268e-09	Dolabradiene monooxygenase [UniProtKB/Swiss-Prot:A0A1D6GQ67]	Os04g0480600	AT3G26200
TraesCS4D02G032200	1.9224	1.76281e-16	Oxalate oxidase GF-2.8 [UniProtKB/Swiss-Prot:P15290]	Os03g0694000	AT1G18980
TraesCS3A02G199200	1.918	7.4874e-29	NA	NA	NA
TraesCS5A02G460500	1.91282	4.69566e-17	GDSL esterase/lipase At5g55050 [UniProtKB/Swiss-Prot:Q9FIA1]	Os03g0580200	NA
TraesCS5A02G432600	1.91006	0.00650882	Probable glutathione S-transferase GSTF1 [UniProtKB/Swiss-Prot:O65857]	Os01g0372400	NA
TraesCS1D02G376500	1.89668	0.00318498	Ethylene-responsive transcription factor ERF109 [UniProtKB/Swiss-Prot:Q9SZ06]	Os05g0497200	NA
TraesCS6B02G304000	1.8958	2.33335e-14	NA	NA	NA
TraesCS2D02G264400	1.88631	0.00418258	Quinone-oxidoreductase QR2 [UniProtKB/Swiss-Prot:Q9AYU0]	Os05g0501300	AT4G27270
TraesCS2D02G219800	1.88627	1.25014e-10	L-type lectin-domain containing receptor kinase SIT2 [UniProtKB/Swiss-Prot:Q7XUN6]	Os07g0538400	AT5G54590
TraesCS7B02G283000	1.87838	3.20835e-07	Fructose-bisphosphate aldolase 5, cytosolic [UniProtKB/Swiss-Prot:O65581]	Os06g0608700	AT4G26530
TraesCS1A02G203600	1.87516	3.93548e-30	Chitinase 8 [UniProtKB/Swiss-Prot:Q7XCK6]	Os10g0542900	AT3G12500
TraesCS6A02G024300	1.87204	0.000680058	Probable serine/threonine-protein kinase PBL15 [UniProtKB/Swiss-Prot:Q9SY91]	Os03g0364400	AT1G61590
TraesCS4B02G033400	1.86877	0.00225436	Oxalate oxidase GF-2.8 [UniProtKB/Swiss-Prot:P15290]	Os03g0694000	AT1G74820
TraesCS1A02G333200	1.86274	0.000140287	Probable magnesium transporter NIPA3 [UniProtKB/Swiss-Prot:Q9LNK7]	Os05g0513400	AT4G38730
TraesCS4A02G471500	1.85914	0.00143018	Aspartic proteinase nepenthesin-1 [UniProtKB/Swiss-Prot:Q766C3]	NA	NA
TraesCS7B02G205600	1.85913	1.94492e-05	NAC domain-containing protein 21/22 [UniProtKB/Swiss-Prot:Q84TE6]	Os08g0115800	NA
TraesCS7D02G201400	1.85171	8.04747e-36	Pathogenesis-related protein PRMS [UniProtKB/Swiss-Prot:Q00008]	Os10g0191300	AT2G14580
TraesCS2A02G110200	1.84712	0.000879989	ABC transporter G family member 11 [UniProtKB/Swiss-Prot:Q8RXN0]	Os07g0288700	NA
TraesCS5D02G559700	1.84406	0.000295986	Photosystem II reaction center protein H [UniProtKB/Swiss-Prot:P69555]	CAA33976	ATCG00710
TraesCS1A02G369800	1.83805	5.29781e-84	Serine/threonine-protein kinase STN7, chloroplastic [UniProtKB/Swiss-Prot:Q9S713]	Os05g0549100	AT1G68830
TraesCS7B02G357300	1.82168	0.00179599	NA	NA	NA
TraesCS2D02G478400	1.81583	0.002039	Cyclin-P1-1 [UniProtKB/Swiss-Prot:Q0J9W0]	Os04g0628900	NA
TraesCS5A02G118900	1.81515	6.47632e-105	Chaperone protein ClpC2, chloroplastic [UniProtKB/Swiss-Prot:Q2QVG9]	Os04g0397100	AT5G50920
TraesCS5D02G008300	1.81139	1.56006e-14	Photosystem II protein D1 [UniProtKB/Swiss-Prot:P12463]	CAA34007	ATCG00020
TraesCS3B02G185900	1.80945	2.4747e-06	NA	NA	NA
TraesCS1A02G414000	1.80786	1.21154e-15	NA	Os05g0575000	NA
TraesCS5D02G012300	1.79337	1.6574e-06	Obtusifoliol 14-alpha demethylase [UniProtKB/Swiss-Prot:P93846]	NA	NA
TraesCS5D02G545300	1.79325	1.32097e-08	Pentatricopeptide repeat-containing protein At2g35030, mitochondrial [UniProtKB/Swiss-Prot:O64766]	NA	NA
TraesCS1A02G265200	1.7899	8.78283e-22	Bidirectional sugar transporter SWEET1b [UniProtKB/Swiss-Prot:B8AYH1]	Os05g0426000	AT1G21460
TraesCS1A02G285400	1.78707	4.87547e-26	Probable monofunctional riboflavin biosynthesis protein RIBA 3, chloroplastic [UniProtKB/Swiss-Prot:Q6L506]	Os05g0460600	AT5G59750
TraesCS1A02G401200	1.78289	4.77865e-08	NA	Os05g0508500	NA
TraesCS1A02G329600	1.77643	6.63469e-56	BRCA1-associated RING domain protein 1 [UniProtKB/Swiss-Prot:F4I443]	Os05g0512000	NA
TraesCS7B02G157600	1.75145	1.25913e-05	Exocyst complex component EXO70A1 [UniProtKB/Swiss-Prot:Q9LZD3]	Os08g0530300	AT5G50380
TraesCS3D02G260500	1.74051	2.81865e-25	Basic endochitinase A [UniProtKB/Swiss-Prot:Q9FRV1]	Os06g0726200	AT3G12500
TraesCS1B02G234700	1.73808	4.16026e-08	Metalloendoproteinase 1-MMP [UniProtKB/Swiss-Prot:O23507]	Os10g0557900	AT2G45040
TraesCS1A02G360400	1.73153	2.96989e-17	Probable ADP,ATP carrier protein At5g56450 [UniProtKB/Swiss-Prot:Q9FM86]	Os05g0539600	AT4G26180
TraesCS1A02G424100	1.72817	1.33825e-79	Berberine bridge enzyme-like Cyn d 4 [UniProtKB/Swiss-Prot:Q5QJ60]	NA	NA
TraesCS5A02G489900	1.72307	0.0002074	MLO protein homolog 1 [UniProtKB/Swiss-Prot:O49873]	Os03g0129100	NA
TraesCS3D02G120200	1.72102	4.22707e-05	Crocetin glucosyltransferase, chloroplastic [UniProtKB/Swiss-Prot:F8WKW0]	Os01g0179600	NA
TraesCS1D02G292000	1.70644	1.20489e-06	Protein NUCLEAR FUSION DEFECTIVE 4 [UniProtKB/Swiss-Prot:F4I9E1]	Os05g0475700	NA
TraesCS3B02G598200	1.70237	1.11741e-13	Anthocyanidin 5,3-O-glucosyltransferase [UniProtKB/Swiss-Prot:Q4R1I9]	Os01g0734800	NA
TraesCS3D02G515400	1.69496	2.42794e-10	Putative disease resistance protein RGA3 [UniProtKB/Swiss-Prot:Q7XA40]	NA	NA
TraesCS6D02G057800	1.68776	1.40816e-14	Cytochrome P450 76M5 [UniProtKB/Swiss-Prot:Q6YTF5]	Os08g0508000	NA
TraesCS3B02G563800	1.68724	0.00130248	Cytochrome P450 71AV8 [UniProtKB/Swiss-Prot:E1B2Z9]	Os01g0957600	NA
TraesCS7B02G413400	1.68068	1.59558e-10	Chaperone protein dnaJ 8, chloroplastic [UniProtKB/Swiss-Prot:Q9SAG8]	Os06g0650900	NA
TraesCS3D02G228400	1.67347	1.30336e-32	S-type anion channel SLAH3 [UniProtKB/Swiss-Prot:Q9FLV9]	Os01g0623200	AT4G27970
TraesCS3D02G243900	1.66897	0.00411774	NA	Os01g0667000	NA
TraesCS1A02G387400	1.66576	1.9042e-12	Aspartic proteinase NANA, chloroplast [UniProtKB/Swiss-Prot:Q9LTW4]	Os05g0557100	NA
TraesCS1B02G022400	1.66565	4.66795e-05	Rust resistance kinase Lr10 [UniProtKB/Swiss-Prot:P93604]	Os01g0117100	NA
TraesCS1A02G444000	1.66015	8.12773e-05	Pathogenesis-related protein 1A [UniProtKB/Swiss-Prot:P08299]	Os05g0595200	NA
TraesCS2A02G534400	1.65264	0.000990325	Receptor-like serine/threonine-protein kinase SD1-8 [UniProtKB/Swiss-Prot:O81905]	Os04g0633200	AT4G21366
TraesCS1D02G096400	1.65036	3.09189e-28	Peroxidase 54 [UniProtKB/Swiss-Prot:Q9FG34]	Os05g0162000	NA
TraesCS7D02G494000	1.64852	6.47095e-93	Chaperone protein dnaJ 8, chloroplastic [UniProtKB/Swiss-Prot:Q9SAG8]	Os06g0650900	AT1G80920
TraesCS5D02G452500	1.63759	5.44238e-08	ABC transporter G family member 48 [UniProtKB/Swiss-Prot:Q8GU84]	Os02g0318500	AT2G36380
TraesCS7A02G521500	1.63393	7.70642e-06	NA	NA	NA
TraesCS5A02G128000	1.63001	0.00410681	NA	Os11g0153300	NA
TraesCS6A02G310300	1.62501	1.82155e-06	Metalloendoproteinase 3-MMP [UniProtKB/Swiss-Prot:Q5XF51]	Os02g0740700	AT1G59970
TraesCS3D02G084400	1.6239	8.32199e-11	Protease HtpX homolog 2 [UniProtKB/Swiss-Prot:Q8PSE5]	Os01g0970700	AT3G27110
TraesCS1A02G269400	1.61896	7.05486e-05	Protein NRT1/ PTR FAMILY 5.10 [UniProtKB/Swiss-Prot:Q0WP01]	Os05g0430900	AT1G72120
TraesCS6D02G149300	1.61272	8.18513e-14	Peroxygenase [UniProtKB/Swiss-Prot:A0A1I9R3Y5]	Os06g0254300	NA
TraesCS6B02G406300	1.60822	6.01747e-45	Probable cinnamyl alcohol dehydrogenase 5 [UniProtKB/Swiss-Prot:Q0J6T3]	Os10g0430200	AT4G37970
TraesCS7D02G201300	1.60815	7.91683e-08	Pathogenesis-related protein PRB1-2 [UniProtKB/Swiss-Prot:P35792]	Os10g0191300	AT4G33720
TraesCS6D02G157600	1.60578	0.000974605	NA	Os02g0193200	NA
TraesCS5D02G472200	1.60238	3.5009e-24	GDSL esterase/lipase At5g55050 [UniProtKB/Swiss-Prot:Q9FIA1]	Os03g0580200	NA
TraesCS4D02G116000	1.60207	0.00403906	Factor of DNA methylation 1 [UniProtKB/Swiss-Prot:Q9S9P3]	Os01g0126600	NA
TraesCS6D02G237100	1.60173	0.000914451	Cytochrome P450 87A3 [UniProtKB/Swiss-Prot:Q7XU38]	Os04g0570000	AT1G12740
TraesCS1A02G276200	1.60147	0.000406466	Glucan endo-1,3-beta-glucosidase 14 [UniProtKB/Swiss-Prot:Q9ZQG9]	Os01g0860800	AT2G27500
TraesCS3A02G078400	1.59595	4.64104e-07	NAC transcription factor NAM-B2 [UniProtKB/Swiss-Prot:A0SPJ6]	Os01g0104200	NA
TraesCS2A02G098700	1.59262	1.52778e-05	Probable serine/threonine-protein kinase PBL4 [UniProtKB/Swiss-Prot:Q5PP29]	Os07g0686800	AT1G69790
TraesCS6B02G201500	1.59234	1.869e-31	Cinnamate beta-D-glucosyltransferase [UniProtKB/Swiss-Prot:Q66PF4]	Os02g0188000	NA
TraesCS2D02G255500	1.58495	0.00524876	Succinate dehydrogenase [ubiquinone] flavoprotein subunit, mitochondrial [UniProtKB/Swiss-Prot:Q6ZDY8]	Os07g0134800	AT5G66760
TraesCS1A02G335100	1.58189	0.000221524	O-methyltransferase ZRP4 [UniProtKB/Swiss-Prot:P47917]	Os05g0515500	NA
TraesCS5B02G546200	1.57532	0.000991435	NA	NA	NA
TraesCS1A02G254000	1.57275	4.1879e-06	Cytochrome P450 734A1 [UniProtKB/Swiss-Prot:O48786]	Os05g0405600	NA
TraesCS3B02G389400	1.56314	1.58174e-20	Zinc finger protein ZAT7 [UniProtKB/Swiss-Prot:Q42453]	Os01g0839100	AT3G53600
TraesCS3D02G483000	1.55835	1.32699e-07	Glutathione S-transferase U8 [UniProtKB/Swiss-Prot:Q9SR36]	Os01g0949700	NA
TraesCS2D02G430800	1.55694	8.90656e-08	Plant intracellular Ras-group-related LRR protein 1 [UniProtKB/Swiss-Prot:Q7XNY1]	Os04g0605300	AT4G29880
TraesCS2D02G364600	1.55394	0.00152264	Peroxygenase [UniProtKB/Swiss-Prot:Q7FAX1]	Os04g0511200	AT2G33380
TraesCS7D02G247600	1.55144	0.00253243	PsbP domain-containing protein 3, chloroplastic [UniProtKB/Swiss-Prot:Q9S720]	Os08g0512500	AT1G76450
TraesCS2D02G121400	1.55066	0.000405299	Zinc finger protein CONSTANS-LIKE 13 [UniProtKB/Swiss-Prot:O82256]	Os07g0667300	NA
TraesCS7A02G236200	1.54841	1.77952e-11	Alpha-1,3-arabinosyltransferase XAT2 [UniProtKB/Swiss-Prot:Q6ZFR0]	Os06g0475400	NA
TraesCS3B02G093300	1.54344	2.92155e-28	NAC transcription factor NAM-B2 [UniProtKB/Swiss-Prot:A0SPJ6]	Os01g0104200	NA
TraesCS7D02G490800	1.54242	4.4597e-17	Uncharacterized methyltransferase At2g41040, chloroplastic [UniProtKB/Swiss-Prot:Q0WPT7]	Os06g0646000	AT2G41040
TraesCS5D02G419300	1.54075	0.000415679	Putative disease resistance protein RGA4 [UniProtKB/Swiss-Prot:Q7XA39]	Os11g0160900	NA
TraesCSU02G009000	1.53595	0.004037	UDP-glycosyltransferase 73B4 [UniProtKB/Swiss-Prot:Q7Y232]	NA	NA
TraesCS3A02G309000	1.53317	4.02421e-25	Glutathione S-transferase 1 [UniProtKB/Swiss-Prot:P30110]	Os01g0370200	NA
TraesCS3B02G080700	1.53174	0.00376815	NA	NA	NA
TraesCS1A02G435000	1.53134	1.46833e-10	Probable esterase D14L [UniProtKB/Swiss-Prot:Q10J20]	Os05g0590300	NA
TraesCS1A02G390500	1.5293	1.26936e-09	Cell number regulator 2 [UniProtKB/Swiss-Prot:B6TYV8]	Os02g0579800	AT1G14870
TraesCS1A02G332400	1.5211	0.00205701	NA	Os05g0512500	AT1G26470
TraesCS5B02G566000	1.5197	2.17186e-05	1-aminocyclopropane-1-carboxylate oxidase homolog 1 [UniProtKB/Swiss-Prot:Q84MB3]	Os03g0860600	NA
TraesCS2A02G569300	1.51783	1.62519e-10	NA	NA	NA
TraesCS1A02G239000	1.51341	1.25319e-26	NA	Os05g0381500	NA
TraesCS1A02G400700	1.51279	6.95051e-06	NA	Os05g0565701	NA
TraesCS1A02G186600	1.51241	2.84805e-05	Probable glutathione S-transferase GSTU6 [UniProtKB/Swiss-Prot:Q06398]	Os10g0530200	NA
TraesCS2A02G566000	1.50987	0.000165344	NAC domain-containing protein 30 [UniProtKB/Swiss-Prot:Q9C8W9]	Os04g0691300	NA
TraesCS5B02G525000	1.50661	0.000398582	NA	NA	NA
TraesCS5D02G087900	1.50618	2.36228e-12	AAA-ATPase ASD, mitochondrial [UniProtKB/Swiss-Prot:Q9FLD5]	Os12g0431100	NA
TraesCS2D02G436200	1.50519	5.13053e-13	Ubiquinol oxidase 1b, mitochondrial [UniProtKB/Swiss-Prot:O82766]	Os04g0600300	AT3G22370
TraesCS1B02G466200	1.50304	2.88934e-08	Pathogen-related protein [UniProtKB/Swiss-Prot:P16273]	Os01g0248500	NA
TraesCS6B02G192400	1.49879	1.20809e-39	Copper-transporting ATPase HMA4 [UniProtKB/Swiss-Prot:Q6H7M3]	Os02g0196600	AT1G63440
TraesCS1A02G261400	1.49713	5.49924e-28	MLO-like protein 1 [UniProtKB/Swiss-Prot:O49621]	Os05g0418100	AT4G02600
TraesCS3B02G254700	1.49442	4.67515e-13	S-type anion channel SLAH3 [UniProtKB/Swiss-Prot:Q9FLV9]	Os01g0623200	AT4G27970
TraesCS3A02G265100	1.49376	0.000401135	Protein DETOXIFICATION 14 [UniProtKB/Swiss-Prot:Q9C994]	Os01g0684900	AT5G38030
TraesCS2D02G502300	1.49274	0.00200048	Triacylglycerol lipase OBL1 [UniProtKB/Swiss-Prot:F4JFU8]	Os04g0657500	NA
TraesCS1D02G352600	1.48908	1.60849e-42	Chaperone protein dnaJ C76, chloroplastic [UniProtKB/Swiss-Prot:Q9FMX6]	Os05g0529700	AT2G42750
TraesCS1D02G122400	1.48554	0.000835642	Probable WRKY transcription factor 50 [UniProtKB/Swiss-Prot:Q8VWQ5]	Os05g0183100	NA
TraesCS1B02G370800	1.4834	0.000498058	Calcineurin B-like protein 4 [UniProtKB/Swiss-Prot:Q75KU4]	Os05g0534400	AT5G24270
TraesCS3A02G279800	1.48061	7.08528e-40	Anthocyanidin 5,3-O-glucosyltransferase [UniProtKB/Swiss-Prot:Q4R1I9]	Os01g0734600	AT3G16520
TraesCS7B02G060500	1.4773	0.000800356	NA	NA	NA
TraesCS6B02G022400	1.47613	5.48067e-14	Acetylserotonin O-methyltransferase 1 [UniProtKB/Swiss-Prot:Q6EPG8]	NA	NA
TraesCS2A02G312600	1.47432	5.11641e-12	Ferric reduction oxidase 7, chloroplastic [UniProtKB/Swiss-Prot:Q3KTM0]	Os04g0444800	AT5G49740
TraesCS4A02G043800	1.4738	3.83852e-12	Aminotransferase ALD1 homolog [UniProtKB/Swiss-Prot:Q6VMN7]	Os03g0195100	AT4G33680
TraesCS1A02G262100	1.47279	1.29136e-10	Pheophytinase, chloroplastic [UniProtKB/Swiss-Prot:Q9FFZ1]	Os05g0419000	AT5G38520
TraesCS1D02G440500	1.4616	0.00621481	Pathogen-related protein [UniProtKB/Swiss-Prot:P16273]	Os01g0248500	NA
TraesCSU02G259600	1.45811	9.65746e-05	ATP synthase epsilon chain, chloroplastic [UniProtKB/Swiss-Prot:P69443]	CAA34002	ATCG00470
TraesCS5A02G463500	1.45515	0.00287028	UDP-glycosyltransferase 91C1 [UniProtKB/Swiss-Prot:Q9LTA3]	Os03g0804900	NA
TraesCS1A02G328100	1.44738	0.000194501	Protein LURP-one-related 12 [UniProtKB/Swiss-Prot:Q9LVZ8]	Os05g0510100	NA
TraesCS2A02G455600	1.44541	0.00147324	Probable L-type lectin-domain containing receptor kinase S.5 [UniProtKB/Swiss-Prot:Q9FG33]	Os04g0584100	AT2G17220
TraesCS2D02G075000	1.44355	1.65523e-07	Primary amine oxidase [UniProtKB/Swiss-Prot:Q8H1H9]	Os04g0269600	AT4G12280
TraesCS3D02G542600	1.44154	2.04234e-05	NA	NA	NA
TraesCS1A02G246700	1.44078	0.000293808	Uncharacterized protein At5g19025 [UniProtKB/Swiss-Prot:P0C8Q9]	Os05g0393200	AT5G19025
TraesCS1A02G263600	1.43986	2.6881e-23	Gibberellin 20 oxidase 2 [UniProtKB/Swiss-Prot:Q0JH50]	Os05g0421900	AT1G77330
TraesCS1A02G321700	1.43844	0.000197565	Cyclic nucleotide-gated ion channel 4 [UniProtKB/Swiss-Prot:Q94AS9]	Os05g0502000	AT5G54250
TraesCS5B02G291100	1.43741	4.02649e-07	Acyltransferase-like protein At1g54570, chloroplastic [UniProtKB/Swiss-Prot:Q9ZVN2]	Os09g0509500	AT3G26840
TraesCS6B02G340300	1.43457	0.00032909	Metalloendoproteinase 3-MMP [UniProtKB/Swiss-Prot:Q5XF51]	Os02g0740700	AT1G24140
TraesCS6B02G063900	1.43368	5.50077e-38	Peroxidase 70 [UniProtKB/Swiss-Prot:A5H452]	Os02g0240100	AT5G05340
TraesCS3B02G118300	1.43049	1.40466e-08	7-deoxyloganetin glucosyltransferase [UniProtKB/Swiss-Prot:F8WKW1]	Os02g0755900	AT1G22360
TraesCS1B02G260700	1.42829	0.00510056	Basic endochitinase A [UniProtKB/Swiss-Prot:Q9FRV1]	Os05g0399300	AT3G12500
TraesCS2D02G069100	1.42632	1.90177e-11	Anthocyanidin 5,3-O-glucosyltransferase [UniProtKB/Swiss-Prot:Q4R1I9]	Os01g0697100	NA
TraesCS3D02G350700	1.42612	1.41667e-10	Zinc finger protein ZAT7 [UniProtKB/Swiss-Prot:Q42453]	Os01g0839100	AT3G53600
TraesCS1A02G300000	1.42218	7.04063e-40	U-box domain-containing protein 16 [UniProtKB/Swiss-Prot:Q9LZW3]	Os05g0476700	AT5G01830
TraesCS7D02G206100	1.41538	2.0349e-05	Probable peroxygenase 4 [UniProtKB/Swiss-Prot:Q9CAB7]	Os06g0254600	NA
TraesCS6D02G013600	1.41496	0.00142238	Cysteine-rich receptor-like protein kinase 6 [UniProtKB/Swiss-Prot:Q0D5R3]	Os07g0541000	NA
TraesCS1D02G353800	1.41329	8.57691e-05	NA	Os05g0531000	NA
TraesCS7D02G383300	1.41102	5.38823e-43	Germin-like protein 8-12 [UniProtKB/Swiss-Prot:Q6ZCR3]	Os08g0231400	AT5G39150
TraesCS1A02G275200	1.40921	6.7931e-56	NA	Os05g0440100	AT5G06370
TraesCS7A02G506100	1.40902	8.94186e-26	NA	Os06g0650900	AT1G80920
TraesCS2A02G510800	1.40876	1.34357e-05	Probable isoaspartyl peptidase/L-asparaginase 2 [UniProtKB/Swiss-Prot:Q8GXG1]	Os04g0650700	AT3G16150
TraesCS1B02G020600	1.40814	8.49516e-06	Rust resistance kinase Lr10 [UniProtKB/Swiss-Prot:P93604]	Os01g0116800	NA
TraesCS1A02G304200	1.40593	1.3179e-08	Probable leucine-rich repeat receptor-like protein kinase At5g49770 [UniProtKB/Swiss-Prot:Q9LT96]	Os05g0486100	NA
TraesCS1A02G322100	1.40335	7.50671e-05	NA	Os05g0502500	AT4G27390
TraesCS2B02G614100	1.40278	0.000108625	Peroxidase 12 [UniProtKB/Swiss-Prot:Q96520]	Os04g0688100	NA
TraesCS2A02G438200	1.40069	3.92447e-32	Ubiquinol oxidase 1b, mitochondrial [UniProtKB/Swiss-Prot:O82766]	Os04g0600300	AT3G22370
TraesCS3D02G495700	1.39888	0.000284843	Protein IRON-RELATED TRANSCRIPTION FACTOR 2 [UniProtKB/Swiss-Prot:A2WZ60]	Os01g0952800	NA
TraesCS7D02G077300	1.39551	1.64247e-10	NA	NA	NA
TraesCS6D02G033000	1.39383	0.00174959	Subtilisin-like protease SBT3.8 [UniProtKB/Swiss-Prot:Q9SZY3]	Os01g0794800	NA
TraesCS5B02G268700	1.39149	0.00176836	Cinnamoyl-CoA reductase 1 [UniProtKB/Swiss-Prot:Q6K9A2]	Os09g0491820	AT1G76470
TraesCS5B02G470300	1.38888	0.000123954	GDSL esterase/lipase At5g55050 [UniProtKB/Swiss-Prot:Q9FIA1]	Os03g0580200	NA
TraesCS1A02G443700	1.38781	0.00010984	Sm-like protein LSM8 [UniProtKB/Swiss-Prot:Q8VYI0]	Os05g0594900	AT1G65700
TraesCS1A02G388400	1.38768	2.79677e-15	Probable ubiquitin-conjugating enzyme E2 24 [UniProtKB/Swiss-Prot:Q8VY10]	Os05g0557700	NA
TraesCS2A02G433500	1.38643	5.60041e-56	Putative xyloglucan endotransglucosylase/hydrolase protein 13 [UniProtKB/Swiss-Prot:Q9FKL8]	Os04g0604900	NA
TraesCS3A02G133100	1.3852	0.00333965	Cationic amino acid transporter 5 [UniProtKB/Swiss-Prot:O64759]	Os01g0209800	AT2G34960
TraesCS7D02G491900	1.38161	0.00243014	Patatin-like protein 1 [UniProtKB/Swiss-Prot:B8AQW7]	Os08g0476900	AT2G26560
TraesCS3B02G556500	1.38143	0.000158886	Xylan glycosyltransferase MUCI21 [UniProtKB/Swiss-Prot:Q9SS43]	Os01g0956200	NA
TraesCS3B02G287200	1.3787	3.07043e-05	Bidirectional sugar transporter SWEET2b [UniProtKB/Swiss-Prot:Q5N8J1]	Os01g0700100	AT3G14770
TraesCS6D02G353300	1.37703	1.23112e-34	Probable cinnamyl alcohol dehydrogenase 5 [UniProtKB/Swiss-Prot:Q0J6T3]	Os10g0430200	AT4G39330
TraesCS6B02G329300	1.37691	1.09383e-08	NA	Os02g0713250	NA
TraesCS3A02G309100	1.37577	1.36542e-24	Glutathione S-transferase 1 [UniProtKB/Swiss-Prot:P30110]	Os01g0370200	NA
TraesCS1A02G250400	1.36785	1.08041e-08	NA	NA	NA
TraesCS5B02G560800	1.36529	1.04396e-09	Putative ripening-related protein 7 [UniProtKB/Swiss-Prot:Q7XD65]	NA	NA
TraesCS1A02G231500	1.36351	6.75517e-05	Probable pectinesterase/pectinesterase inhibitor 41 [UniProtKB/Swiss-Prot:Q8RXK7]	Os05g0361500	AT2G47550
TraesCSU02G024000	1.35913	0.00032383	Disease resistance protein RPM1 [UniProtKB/Swiss-Prot:Q39214]	NA	NA
TraesCS3A02G377300	1.35664	0.000544141	Actin-7 [UniProtKB/Swiss-Prot:P0C540]	Os01g0866100	AT5G09810
TraesCS5D02G457200	1.35	0.000752488	50S ribosomal protein L32, chloroplastic [UniProtKB/Swiss-Prot:Q95H45]	CAA33951	ATCG01020
TraesCS3D02G084600	1.34984	0.00133966	Cytochrome P450 704C1 [UniProtKB/Swiss-Prot:Q50EK3]	Os04g0573900	NA
TraesCS6D02G054900	1.34561	2.4923e-30	Peroxidase 70 [UniProtKB/Swiss-Prot:A5H452]	Os02g0240100	AT5G05340
TraesCS1A02G367100	1.34409	8.92981e-05	Mitogen-activated protein kinase kinase kinase 17 [UniProtKB/Swiss-Prot:O80888]	Os05g0545400	NA
TraesCS1A02G305500	1.34213	0.00176412	Myb-related protein 1 [UniProtKB/Swiss-Prot:Q9FK47]	Os05g0488600	NA
TraesCS1A02G300600	1.33839	0.00584666	RING-H2 finger protein ATL72 [UniProtKB/Swiss-Prot:Q9SG96]	Os05g0478000	AT5G05280
TraesCS4B02G000800	1.33675	0.0038061	Uncharacterized protein At1g76660 [UniProtKB/Swiss-Prot:Q9SRE5]	NA	NA
TraesCS1A02G417700	1.3361	0.000851054	NA	Os05g0578100	NA
TraesCS2B02G608400	1.33562	0.000831789	NA	NA	NA
TraesCS2D02G162200	1.33539	0.00337996	Probable calcium-binding protein CML46 [UniProtKB/Swiss-Prot:Q93Z27]	Os07g0631700	AT5G39670
TraesCS1D02G237500	1.33438	8.95549e-91	Lichenase-2 (Fragment) [UniProtKB/Swiss-Prot:P12257]	Os05g0375400	NA
TraesCS6B02G372300	1.3327	3.67874e-05	NA	NA	NA
TraesCS1A02G408800	1.3323	0.0023529	Salutaridine reductase [UniProtKB/Swiss-Prot:Q071N0]	NA	NA
TraesCS5A02G171600	1.3289	8.4158e-06	NA	Os09g0272000	AT3G07600
TraesCS5D02G165100	1.3284	0.00341182	Protein PHOX1 [UniProtKB/Swiss-Prot:F4IRM4]	Os09g0135400	NA
TraesCS3D02G078900	1.31985	2.35659e-10	NAC transcription factor NAM-B2 [UniProtKB/Swiss-Prot:A0SPJ6]	Os01g0104200	NA
TraesCS7D02G531800	1.31931	0.000960719	Rhodanese-like domain-containing protein 15, chloroplastic [UniProtKB/Swiss-Prot:Q38853]	Os06g0725000	AT5G66040
TraesCS3D02G254700	1.31827	4.65168e-05	F-box/kelch-repeat protein At1g23390 [UniProtKB/Swiss-Prot:Q9LDE3]	Os01g0704300	NA
TraesCS6D02G382100	1.31661	0.00443531	RING-H2 finger protein ATL1 [UniProtKB/Swiss-Prot:P93823]	Os02g0820200	NA
TraesCS7D02G377400	1.31656	3.32931e-10	Fructose-bisphosphate aldolase 5, cytosolic [UniProtKB/Swiss-Prot:O65581]	Os06g0608700	AT4G26530
TraesCS1A02G265900	1.31651	1.72367e-54	NA	NA	NA
TraesCS6B02G075200	1.31408	6.7768e-15	NAC domain-containing protein 67 [UniProtKB/Swiss-Prot:Q7EZT1]	Os07g0225300	NA
TraesCS1A02G423700	1.31309	0.003065	NA	Os05g0584300	AT2G46150
TraesCS2A02G501900	1.31284	5.32584e-10	Farnesyl pyrophosphate synthase [UniProtKB/Swiss-Prot:Q4JHN6]	Os04g0657100	AT4G17190
TraesCS1A02G312400	1.31149	0.00043762	Probable glycerol-3-phosphate dehydrogenase [NAD(+)] 3, cytosolic [UniProtKB/Swiss-Prot:Q65X70]	Os05g0495700	AT2G41540
TraesCS6B02G191900	1.31074	4.82383e-45	MLO-like protein 1 [UniProtKB/Swiss-Prot:O49621]	Os02g0197200	NA
TraesCS2B02G595300	1.30973	4.13636e-08	Probable allantoinase [UniProtKB/Swiss-Prot:B9FDB8]	Os04g0680400	AT4G04955
TraesCS1A02G315500	1.30971	6.83047e-05	Ribosomal protein L11 methyltransferase [UniProtKB/Swiss-Prot:A9AI41]	Os05g0497675	NA
TraesCS4D02G243100	1.30968	2.5791e-33	Sugar transport protein MST4 [UniProtKB/Swiss-Prot:Q10PW9]	Os03g0218400	AT5G26340
TraesCS1A02G376500	1.30964	0.000747037	NA	Os05g0552100	NA
TraesCS1A02G295300	1.30883	5.23129e-09	Ammonium transporter 2 member 1 [UniProtKB/Swiss-Prot:Q84KJ7]	Os05g0468700	AT2G38290
TraesCS2D02G573000	1.304	1.14011e-05	Photosystem II CP43 reaction center protein [UniProtKB/Swiss-Prot:P11095]	CAA34014	ATCG00280
TraesCS1A02G281600	1.29783	2.33087e-25	PRA1 family protein A2 [UniProtKB/Swiss-Prot:Q8GWC3]	Os05g0455600	AT5G02040
TraesCS6D02G018500	1.2925	5.72047e-11	Bisdemethoxycurcumin synthase [UniProtKB/Swiss-Prot:Q8LIL0]	Os05g0212900	NA
TraesCS2B02G267400	1.28964	0.00235262	Protein G1 [UniProtKB/Swiss-Prot:Q8GVZ6]	Os07g0139300	NA
TraesCS6B02G132400	1.2895	2.55958e-07	NA	NA	NA
TraesCS1A02G261800	1.28683	1.58685e-15	NAC domain-containing protein 35 [UniProtKB/Swiss-Prot:Q9ZVP8]	Os05g0418800	NA
TraesCS1A02G229800	1.28608	0.00172049	Phytochrome A-associated F-box protein [UniProtKB/Swiss-Prot:Q8LEA8]	Os05g0365000	AT4G02440
TraesCS1A02G408900	1.28405	1.42967e-19	Protease Do-like 1, chloroplastic [UniProtKB/Swiss-Prot:O22609]	Os05g0568900	AT3G27925
TraesCS7D02G302000	1.27885	2.03953e-10	NAC domain-containing protein 21/22 [UniProtKB/Swiss-Prot:Q84TE6]	Os08g0115800	NA
TraesCS1A02G284900	1.27861	9.88015e-24	Chitinase 2 [UniProtKB/Swiss-Prot:Q7M443]	Os10g0416800	NA
TraesCS1A02G285600	1.27291	2.12992e-07	Very-long-chain (3R)-3-hydroxyacyl-CoA dehydratase 2 [UniProtKB/Swiss-Prot:Q9D3B1]	Os05g0460800	AT5G59770
TraesCS1A02G238800	1.27271	3.57729e-27	Probable calcium-binding protein CML15 [UniProtKB/Swiss-Prot:Q6L4D4]	Os05g0380900	NA
TraesCS1A02G372400	1.27229	6.09485e-70	AFG1-like ATPase [UniProtKB/Swiss-Prot:Q3V384]	Os08g0265500	AT4G28070
TraesCS1A02G291800	1.26595	0.00289039	Uncharacterized protein At4g08330, chloroplastic [UniProtKB/Swiss-Prot:Q9STN5]	Os01g0833400	NA
TraesCS4D02G068900	1.26541	6.3224e-17	Protein DETOXIFICATION 29 [UniProtKB/Swiss-Prot:Q38956]	Os03g0626700	AT3G26590
TraesCS3B02G020700	1.26473	1.33555e-13	NA	Os01g0120500	AT1G18060
TraesCS5A02G498300	1.26462	0.000989421	Sorcin [UniProtKB/Swiss-Prot:Q94743]	NA	NA
TraesCS7A02G381100	1.26415	6.19717e-16	Fructose-bisphosphate aldolase 5, cytosolic [UniProtKB/Swiss-Prot:O65581]	Os06g0608700	AT4G26530
TraesCS4D02G285300	1.26352	0.000356622	Patatin-like protein 2 [UniProtKB/Swiss-Prot:O48723]	Os08g0476900	AT2G26560
TraesCS7D02G142000	1.26235	0.000498168	Protein SRG1 [UniProtKB/Swiss-Prot:Q39224]	Os06g0178650	NA
TraesCS1A02G358400	1.25985	9.00254e-10	Probable WRKY transcription factor 51 [UniProtKB/Swiss-Prot:Q93WU9]	Os05g0537100	NA
TraesCS4D02G219400	1.25969	3.36304e-08	NA	Os03g0257500	NA
TraesCS1A02G252400	1.25898	2.61638e-11	Peptide methionine sulfoxide reductase B3, chloroplastic [UniProtKB/Swiss-Prot:Q6AUK5]	Os05g0404200	AT4G04830
TraesCS3A02G375100	1.25865	0.00429678	NA	Os01g0862200	AT2G36145
TraesCS6D02G020700	1.25757	5.24727e-11	Nitrate reductase [NADH] [UniProtKB/Swiss-Prot:P27967]	Os08g0468100	AT1G37130
TraesCS3B02G536100	1.25715	6.82632e-11	Probable glutathione S-transferase [UniProtKB/Swiss-Prot:P32110]	Os01g0949700	NA
TraesCS1A02G292000	1.2563	4.96009e-05	CTD small phosphatase-like protein 2 [UniProtKB/Swiss-Prot:Q54GB2]	Os05g0466800	AT3G55960
TraesCS2A02G509600	1.25327	0.000255408	Serine/threonine-protein kinase-like protein CCR4 [UniProtKB/Swiss-Prot:Q9FIJ6]	Os04g0655300	NA
TraesCS2D02G431500	1.25296	6.72745e-49	Putative xyloglucan endotransglucosylase/hydrolase protein 13 [UniProtKB/Swiss-Prot:Q9FKL8]	Os04g0604900	NA
TraesCS1A02G425400	1.25273	2.07536e-06	Probable GABA transporter 2 [UniProtKB/Swiss-Prot:Q8L4X4]	Os05g0586500	AT5G41800
TraesCS2B02G163300	1.24794	0.00614216	Protein DETOXIFICATION 19 [UniProtKB/Swiss-Prot:Q9LUH2]	Os07g0516600	AT3G23560
TraesCS1A02G279800	1.24589	4.22528e-22	O-fucosyltransferase 19 [UniProtKB/Swiss-Prot:Q9SH89]	Os05g0451900	AT2G37980
TraesCS2A02G350900	1.24505	2.0861e-06	Chitinase 5 [UniProtKB/Swiss-Prot:Q7Y1Z0]	Os04g0493400	AT3G54420
TraesCS7B02G455300	1.24491	0.000214852	Putative 12-oxophytodienoate reductase 2 [UniProtKB/Swiss-Prot:Q69TH4]	NA	AT1G76690
TraesCS1A02G356900	1.24487	0.000119445	Probable choline kinase 2 [UniProtKB/Swiss-Prot:Q8L518]	Os05g0535400	AT1G74320
TraesCS3B02G113500	1.24387	4.87883e-59	Probable staphylococcal-like nuclease CAN1 [UniProtKB/Swiss-Prot:Q942N7]	Os01g0166100	AT2G40410
TraesCS1A02G332200	1.24324	1.90694e-11	NA	Os05g0512200	AT3G01060
TraesCS6A02G057400	1.24318	3.38329e-13	NAC domain-containing protein 67 [UniProtKB/Swiss-Prot:Q7EZT1]	Os07g0225300	NA
TraesCS3B02G372300	1.24223	1.04846e-09	Protein LURP-one-related 8 [UniProtKB/Swiss-Prot:Q9ZVI6]	Os01g0817650	NA
TraesCS1A02G275300	1.24206	9.90658e-10	Histone deacetylase 8 [UniProtKB/Swiss-Prot:Q94EJ2]	Os05g0440250	AT1G08460
TraesCS1A02G255000	1.2407	3.7932e-09	LEC14B protein [UniProtKB/Swiss-Prot:Q40153]	Os05g0407200	AT4G03020
TraesCS1A02G334800	1.24069	3.32093e-26	Cytochrome P450 71A1 [UniProtKB/Swiss-Prot:P24465]	Os05g0515200	NA
TraesCS6B02G347700	1.23911	0.00257172	7-deoxyloganetin glucosyltransferase [UniProtKB/Swiss-Prot:F8WKW1]	Os02g0755900	AT1G22360
TraesCS2D02G321600	1.23868	1.4106e-05	Galactose mutarotase [UniProtKB/Swiss-Prot:Q66HG4]	Os04g0458300	AT5G15140
TraesCS1B02G364200	1.23793	7.7419e-29	Chaperone protein dnaJ C76, chloroplastic [UniProtKB/Swiss-Prot:Q9FMX6]	Os05g0529700	AT2G42750
TraesCS7A02G053100	1.23647	9.0163e-05	Oligopeptide transporter 7 [UniProtKB/Swiss-Prot:O82485]	Os06g0125400	AT4G10770
TraesCS5B02G549300	1.23645	0.000123263	Uncharacterized protein At4g15970 [UniProtKB/Swiss-Prot:P0C042]	Os03g0849900	NA
TraesCS2D02G502400	1.23492	8.8468e-22	Farnesyl pyrophosphate synthase [UniProtKB/Swiss-Prot:Q4JHN6]	Os04g0657100	AT4G17190
TraesCS3D02G181800	1.23481	7.90507e-11	Flowering-promoting factor 1-like protein 1 [UniProtKB/Swiss-Prot:Q9LGE3]	Os01g0257300	AT5G24860
TraesCS3D02G518200	1.23216	2.25774e-08	Cationic peroxidase SPC4 [UniProtKB/Swiss-Prot:P84516]	Os01g0962700	AT1G71695
TraesCS7B02G257400	1.23109	3.45926e-13	F-box/kelch-repeat protein At1g80440 [UniProtKB/Swiss-Prot:Q9M8L2]	Os06g0594400	AT1G15670
TraesCS4B02G315400	1.22675	2.40753e-05	Calmodulin-binding receptor-like cytoplasmic kinase 2 [UniProtKB/Swiss-Prot:Q8VZJ9]	Os03g0148700	NA
TraesCS2D02G115300	1.22667	0.000261165	Flowering-promoting factor 1-like protein 5 [UniProtKB/Swiss-Prot:A3BNA1]	Os07g0671000	AT5G10625
TraesCS3A02G356600	1.22443	5.22967e-07	Zinc finger protein ZAT5 [UniProtKB/Swiss-Prot:Q681X4]	Os01g0839100	AT3G53600
TraesCS6A02G318700	1.22341	4.17555e-07	NA	Os02g0754600	NA
TraesCS3B02G410400	1.22056	1.71096e-33	Fructose-1,6-bisphosphatase, cytosolic [UniProtKB/Swiss-Prot:Q43139]	Os01g0866400	AT1G43670
TraesCS1A02G279100	1.21956	3.88012e-30	Coronatine-insensitive protein homolog 1b [UniProtKB/Swiss-Prot:Q60EH4]	Os05g0449500	AT2G39940
TraesCS7A02G454300	1.21582	1.42021e-06	Carbonic anhydrase, chloroplastic [UniProtKB/Swiss-Prot:P40880]	Os01g0639900	NA
TraesCS2D02G070300	1.21561	0.000333444	Probable flavin-containing monooxygenase 1 [UniProtKB/Swiss-Prot:Q9LMA1]	Os04g0223500	NA
TraesCS5D02G342600	1.21433	1.53751e-06	Ankyrin repeat-containing protein At2g01680 [UniProtKB/Swiss-Prot:Q9ZU96]	Os09g0518500	NA
TraesCS7A02G090300	1.21357	0.0058046	NA	Os06g0143100	NA
TraesCS1A02G367200	1.21344	3.96222e-05	Mitogen-activated protein kinase kinase kinase 17 [UniProtKB/Swiss-Prot:O80888]	Os05g0545400	NA
TraesCS5A02G229700	1.21086	0.000462128	High affinity sulfate transporter 2 [UniProtKB/Swiss-Prot:P53392]	Os08g0406400	AT1G78000
TraesCS6B02G056900	1.21024	8.8993e-18	Polyphenol oxidase F, chloroplastic [UniProtKB/Swiss-Prot:Q08296]	NA	NA
TraesCS2B02G454100	1.20447	9.99387e-07	Plant intracellular Ras-group-related LRR protein 1 [UniProtKB/Swiss-Prot:Q7XNY1]	Os04g0605300	AT4G29880
TraesCS2B02G464900	1.20417	0.000299991	Protein NRT1/ PTR FAMILY 8.5 [UniProtKB/Swiss-Prot:Q93Z20]	Os04g0597501	NA
TraesCS4A02G446500	1.20248	1.28066e-05	NA	NA	NA
TraesCS5B02G478100	1.20231	2.64732e-12	NA	NA	NA
TraesCS7D02G203900	1.19543	0.000124341	MACPF domain-containing protein At1g14780 [UniProtKB/Swiss-Prot:Q8L612]	Os06g0251100	NA
TraesCS1A02G258200	1.1954	1.10108e-38	NA	Os05g0411600	AT2G40960
TraesCS6B02G406000	1.19475	3.50658e-18	Probable cinnamyl alcohol dehydrogenase 5 [UniProtKB/Swiss-Prot:Q0J6T3]	Os10g0430200	AT4G37990
TraesCS1D02G223000	1.1935	5.96276e-05	Metalloendoproteinase 1-MMP [UniProtKB/Swiss-Prot:O23507]	Os10g0557900	AT2G45040
TraesCS2A02G377200	1.1927	0.000214229	Probable metal-nicotianamine transporter YSL12 [UniProtKB/Swiss-Prot:Q5JQD7]	Os04g0524600	AT1G65730
TraesCS1A02G246400	1.19107	2.01505e-40	Peroxisomal adenine nucleotide carrier 1 [UniProtKB/Swiss-Prot:Q9MA90]	Os05g0392700	AT3G05290
TraesCS6D02G153100	1.19021	1.59185e-50	MLO-like protein 1 [UniProtKB/Swiss-Prot:O49621]	Os02g0197200	NA
TraesCS3D02G048200	1.18573	1.41667e-07	NA	NA	NA
TraesCS1A02G373200	1.18328	9.24454e-12	Probable E3 ubiquitin-protein ligase HIP1 [UniProtKB/Swiss-Prot:Q7XTV7]	Os05g0550000	NA
TraesCS1A02G414700	1.18129	0.00286142	NA	Os05g0576600	NA
TraesCS1A02G259400	1.1804	0.000402102	F-box/FBD/LRR-repeat protein At1g13570 [UniProtKB/Swiss-Prot:Q9FZ70]	Os05g0575400	NA
TraesCS3D02G256100	1.1798	8.38998e-06	Bidirectional sugar transporter SWEET2b [UniProtKB/Swiss-Prot:Q5N8J1]	Os01g0700100	AT3G14770
TraesCS1A02G259000	1.17927	2.17635e-16	Isopentenyl-diphosphate Delta-isomerase I [UniProtKB/Swiss-Prot:Q39472]	Os05g0413400	AT3G02780
TraesCS7B02G058500	1.17894	0.000624568	Probable polyol transporter 6 [UniProtKB/Swiss-Prot:Q8GXR2]	Os10g0360100	AT4G36670
TraesCS1A02G280900	1.17883	0.00338421	Rop guanine nucleotide exchange factor 7 [UniProtKB/Swiss-Prot:Q9LZN0]	Os05g0454200	AT5G02010
TraesCS6A02G017500	1.17851	8.79552e-06	Nitrate reductase [NADH] [UniProtKB/Swiss-Prot:P27967]	Os08g0468100	AT1G77760
TraesCS7D02G390300	1.17706	1.68648e-15	NA	Os06g0624900	AT1G76590
TraesCS1A02G265600	1.17665	8.49771e-90	NA	NA	NA
TraesCS5D02G532500	1.1763	0.00564973	Putative disease resistance protein RGA4 [UniProtKB/Swiss-Prot:Q7XA39]	NA	NA
TraesCS1A02G319500	1.1745	0.00118805	NA	Os05g0500450	AT3G59840
TraesCS3A02G369900	1.17387	2.40069e-05	NA	Os01g0856900	AT5G01260
TraesCS1A02G311200	1.17365	0.000331014	EID1-like F-box protein 3 [UniProtKB/Swiss-Prot:Q93ZT5]	Os05g0494600	NA
TraesCS4B02G328400	1.17279	8.40017e-08	L-type lectin-domain containing receptor kinase IX.1 [UniProtKB/Swiss-Prot:Q9LXA5]	Os03g0132900	NA
TraesCS1A02G282800	1.17227	1.54127e-05	NA	Os05g0456900	AT5G02090
TraesCS1A02G363200	1.1703	1.95935e-05	Vesicle transport v-SNARE 11 [UniProtKB/Swiss-Prot:Q9SEL6]	Os01g0707300	AT5G39510
TraesCS2D02G198900	1.16956	3.7596e-05	Putative polyol transporter 1 [UniProtKB/Swiss-Prot:Q9XIH7]	Os07g0582400	AT2G16120
TraesCS7A02G529000	1.16946	1.918e-05	Chaperone protein dnaJ 11, chloroplastic [UniProtKB/Swiss-Prot:Q9FYB5]	Os06g0716100	NA
TraesCS4B02G060100	1.16744	0.000331291	Thioredoxin-like protein AAED1, chloroplastic [UniProtKB/Swiss-Prot:Q9ZUU2]	Os03g0729300	AT5G65840
TraesCS5B02G389500	1.16743	0.000515973	NA	Os03g0746700	AT3G22550
TraesCS5D02G514700	1.16664	0.000102643	Cytochrome P450 71A2 [UniProtKB/Swiss-Prot:P37118]	NA	NA
TraesCS4D02G325500	1.16614	7.38708e-05	L-type lectin-domain containing receptor kinase IX.1 [UniProtKB/Swiss-Prot:Q9LXA5]	Os03g0132900	NA
TraesCS2A02G287600	1.16575	0.00596385	Trihelix transcription factor ASR3 [UniProtKB/Swiss-Prot:Q8VZ20]	Os04g0397500	AT2G33550
TraesCS1A02G413700	1.1615	7.41277e-07	Fatty acid amide hydrolase [UniProtKB/Swiss-Prot:Q7XJJ7]	Os12g0169000	NA
TraesCS1A02G342900	1.16147	5.35625e-13	ABC transporter A family member 2 [UniProtKB/Swiss-Prot:Q84K47]	Os08g0398000	AT3G47730
TraesCS4D02G002100	1.16028	1.44062e-05	Uncharacterized protein At1g76660 [UniProtKB/Swiss-Prot:Q9SRE5]	NA	NA
TraesCS5D02G550900	1.15958	0.0013653	Disease resistance protein RGA4 [UniProtKB/Swiss-Prot:F7J0M6]	NA	NA
TraesCS5A02G261400	1.15903	0.000947076	Berberine bridge enzyme-like Cyn d 4 [UniProtKB/Swiss-Prot:Q5QJ60]	Os06g0549900	NA
TraesCS5B02G015700	1.15826	9.71057e-06	Thaumatin-like protein [UniProtKB/Swiss-Prot:P81370]	Os12g0630500	NA
TraesCS1A02G334100	1.15485	1.6762e-13	Dof zinc finger protein 5 [UniProtKB/Swiss-Prot:Q5JLR7]	Os05g0440000	NA
TraesCS5B02G183500	1.15257	2.06195e-24	ABC transporter G family member 53 [UniProtKB/Swiss-Prot:A3BXL8]	Os09g0332700	AT1G15520
TraesCS2A02G380100	1.15218	9.21019e-10	NA	Os04g0520700	NA
TraesCS7D02G233900	1.15152	3.16312e-11	Protein POOR HOMOLOGOUS SYNAPSIS 1 [UniProtKB/Swiss-Prot:Q6W2J0]	Os06g0473000	AT1G10710
TraesCS1A02G361100	1.15115	2.39895e-12	Glucosamine inositolphosphorylceramide transferase 1 [UniProtKB/Swiss-Prot:Q53WK1]	Os05g0540000	AT5G04500
TraesCS4D02G055700	1.14974	3.47512e-11	Phenolic glucoside malonyltransferase 2 [UniProtKB/Swiss-Prot:Q9LRQ8]	NA	NA
TraesCS4B02G045100	1.14746	0.00452045	NA	Os03g0710000	NA
TraesCS1D02G282300	1.14731	0.000987098	Glycerol-3-phosphate acyltransferase 5 [UniProtKB/Swiss-Prot:Q9CAY3]	Os05g0457800	AT5G06090
TraesCS3B02G355900	1.14717	0.000471928	Polyphenol oxidase, chloroplastic [UniProtKB/Swiss-Prot:P43309]	Os01g0793300	NA
TraesCS1A02G431500	1.14714	2.09316e-08	Phosphoglucan phosphatase LSF1, chloroplastic [UniProtKB/Swiss-Prot:F4J117]	Os08g0379300	AT3G01510
TraesCS1A02G401800	1.1471	0.00270453	WRKY transcription factor 71 [UniProtKB/Swiss-Prot:Q93WV4]	Os05g0565900	NA
TraesCS4A02G235300	1.14607	1.27981e-07	Protein tas [UniProtKB/Swiss-Prot:P0A9T5]	Os03g0611200	AT1G04420
TraesCS1A02G298000	1.14059	2.46988e-08	Sorting nexin 2B [UniProtKB/Swiss-Prot:B9DFS6]	Os05g0474500	AT5G58440
TraesCS6A02G416000	1.14046	2.10873e-19	NA	NA	AT3G19900
TraesCS2B02G157500	1.1397	0.00026463	NA	Os07g0656700	AT5G13720
TraesCS7A02G090100	1.13655	0.000807179	NA	Os06g0143100	NA
TraesCS3D02G497000	1.13532	0.000134718	GPI-anchored protein LLG1 [UniProtKB/Swiss-Prot:Q9FKT1]	NA	NA
TraesCS1A02G310700	1.13482	1.02603e-08	Dr1-associated corepressor [UniProtKB/Swiss-Prot:Q9D6N5]	Os05g0494100	NA
TraesCS2D02G313700	1.13477	1.85693e-12	Non-functional NADPH-dependent codeinone reductase 2 [UniProtKB/Swiss-Prot:Q9SQ64]	Os04g0447600	AT1G59960
TraesCS1A02G395200	1.1347	2.16489e-40	Protein DEHYDRATION-INDUCED 19 [UniProtKB/Swiss-Prot:Q688X9]	Os05g0562200	NA
TraesCS1A02G284000	1.13405	1.04057e-08	Transcription factor MYB3R-2 [UniProtKB/Swiss-Prot:Q0JHU7]	Os05g0459000	AT5G02320
TraesCS7B02G443200	1.1321	3.21089e-06	UPF0047 protein YjbQ [UniProtKB/Swiss-Prot:P0AF48]	Os06g0638200	AT1G21065
TraesCS7A02G418500	1.13201	0.000107804	Cation transporter HKT1 [UniProtKB/Swiss-Prot:Q0D9S3]	Os06g0701700	NA
TraesCS7B02G474300	1.13122	3.00598e-13	Glycosyltransferase family 92 protein Os08g0121900 [UniProtKB/Swiss-Prot:Q6YRM6]	Os06g0727900	NA
TraesCS1A02G289300	1.13116	3.41809e-13	NA	Os05g0465000	NA
TraesCS1B02G309000	1.13088	3.76745e-05	Protein NUCLEAR FUSION DEFECTIVE 4 [UniProtKB/Swiss-Prot:F4I9E1]	Os05g0475700	AT2G30300
TraesCS4D02G045300	1.13075	3.31673e-13	ACD11 homolog protein [UniProtKB/Swiss-Prot:Q8L7U7]	Os03g0710700	AT4G39670
TraesCS1A02G263700	1.13003	8.71854e-39	NAC domain-containing protein 48 [UniProtKB/Swiss-Prot:Q7F2L3]	Os05g0421600	AT1G77450
TraesCS1A02G265700	1.12912	2.15935e-75	NA	NA	NA
TraesCS2D02G315200	1.1251	8.33517e-08	Uncharacterized membrane protein At3g27390 [UniProtKB/Swiss-Prot:Q8GUM4]	Os04g0449500	AT4G37030
TraesCS1B02G125400	1.12499	2.35394e-14	Peroxisomal membrane protein 2 [UniProtKB/Swiss-Prot:Q2KIY1]	Os03g0583800	AT1G52870
TraesCS3D02G144900	1.12397	6.15553e-16	Protein DJ-1 homolog B [UniProtKB/Swiss-Prot:Q9MAH3]	Os01g0217500	AT3G14990
TraesCS1A02G239800	1.1237	5.41318e-15	Mitochondrial fission 1 protein A [UniProtKB/Swiss-Prot:Q9M1J1]	Os05g0383000	AT5G12390
TraesCS7D02G443400	1.12367	5.58716e-05	Carbonic anhydrase, chloroplastic [UniProtKB/Swiss-Prot:P40880]	Os01g0639900	AT3G01500
TraesCS1A02G245600	1.1231	8.34274e-25	Cyclin-dependent kinase D-1 [UniProtKB/Swiss-Prot:P29620]	Os05g0392300	AT1G66750
TraesCS7A02G269400	1.12241	0.000179648	Uncharacterized protein MJ1365 [UniProtKB/Swiss-Prot:Q58760]	Os08g0545700	AT5G52030
TraesCS2B02G586400	1.12217	1.33637e-06	Chaperone protein dnaJ C76, chloroplastic [UniProtKB/Swiss-Prot:Q9FMX6]	Os04g0675400	NA
TraesCS1A02G355500	1.1199	5.03269e-38	NA	Os05g0531500	NA
TraesCS1B02G249000	1.11824	4.68921e-47	Lichenase-2 (Fragment) [UniProtKB/Swiss-Prot:P12257]	Os05g0375400	NA
TraesCS1A02G375200	1.11406	0.000268881	Quinolone resistance protein NorA [UniProtKB/Swiss-Prot:Q5HHX4]	Os08g0410500	AT1G78130
TraesCS3A02G397000	1.11305	4.72665e-09	NA	Os01g0898800	AT1G05870
TraesCS1A02G351900	1.1119	2.08292e-42	Alpha-1,3-arabinosyltransferase XAT2 [UniProtKB/Swiss-Prot:Q6ZFR0]	Os05g0391600	NA
TraesCS1A02G270900	1.10908	7.46703e-11	NA	Os05g0433800	NA
TraesCS6B02G024900	1.10513	4.27866e-08	Nitrate reductase [NADH] [UniProtKB/Swiss-Prot:P27967]	Os08g0468100	AT1G37130
TraesCS6B02G200000	1.10453	9.8427e-07	D-amino-acid transaminase, chloroplastic [UniProtKB/Swiss-Prot:Q8L493]	Os02g0273100	AT5G57850
TraesCS2B02G028500	1.10342	0.00227424	Dirigent protein 5 [UniProtKB/Swiss-Prot:Q9SH66]	NA	AT1G64160
TraesCS3D02G434200	1.10292	0.00267909	Acyl transferase 7 [UniProtKB/Swiss-Prot:Q0DKA5]	Os01g0924933	NA
TraesCS1A02G308000	1.10261	3.62592e-11	NA	Os05g0490500	NA
TraesCS6B02G298700	1.10255	0.00419761	WAT1-related protein At5g45370 [UniProtKB/Swiss-Prot:F4KD68]	Os02g0703900	AT5G45370
TraesCS5B02G530800	1.10111	0.000827285	Ras-related protein RABA2a [UniProtKB/Swiss-Prot:O04486]	Os03g0843100	AT1G09630
TraesCS3B02G183400	1.10109	9.71048e-08	Cyclin-A1-1 [UniProtKB/Swiss-Prot:Q7F830]	Os01g0233100	AT1G44110
TraesCS1A02G364500	1.09961	7.44399e-09	NA	Os05g0335100	NA
TraesCS1A02G423800	1.0994	2.8048e-65	Late embryogenesis abundant protein Lea14-A [UniProtKB/Swiss-Prot:P46518]	Os05g0584200	AT2G46140
TraesCS3B02G146500	1.09844	0.00382758	Uncharacterized acetyltransferase At3g50280 [UniProtKB/Swiss-Prot:Q9SND9]	Os01g0185300	NA
TraesCS2B02G483100	1.09769	2.21584e-08	NA	NA	NA
TraesCS2B02G537500	1.09357	3.76996e-06	Serine/threonine-protein kinase-like protein CCR4 [UniProtKB/Swiss-Prot:Q9FIJ6]	Os04g0658700	NA
TraesCS7B02G413500	1.09305	0.000233815	NA	Os06g0650900	NA
TraesCS1A02G341500	1.0905	4.24001e-07	Kinesin-like protein KIN-14K [UniProtKB/Swiss-Prot:B9FL70]	Os05g0521300	NA
TraesCS3A02G390000	1.08797	1.37085e-22	F-box protein At5g07610 [UniProtKB/Swiss-Prot:Q9FLS0]	Os01g0876300	NA
TraesCS1B02G393100	1.08731	0.000799634	Homeobox-leucine zipper protein HOX7 [UniProtKB/Swiss-Prot:Q0E0A6]	Os09g0447000	NA
TraesCS5D02G050100	1.08715	2.21628e-14	Protein WIR1A [UniProtKB/Swiss-Prot:Q01482]	NA	NA
TraesCS1A02G240200	1.08674	0.00161562	NA	Os05g0383200	NA
TraesCS1A02G390400	1.0847	1.41085e-07	UV-B-induced protein At3g17800, chloroplastic [UniProtKB/Swiss-Prot:Q9LVJ0]	Os11g0456100	NA
TraesCS2A02G367700	1.08451	2.78927e-06	Peroxygenase [UniProtKB/Swiss-Prot:Q7FAX1]	Os04g0511200	AT2G33380
TraesCS1A02G247900	1.08253	5.04034e-16	DUF21 domain-containing protein At4g14240 [UniProtKB/Swiss-Prot:Q67XQ0]	Os05g0395300	AT4G14240
TraesCS2A02G186600	1.08202	0.000454617	Pheophytinase, chloroplastic [UniProtKB/Swiss-Prot:Q9FFZ1]	Os07g0575800	AT5G19850
TraesCS6A02G376200	1.08153	3.31261e-05	Wall-associated receptor kinase 5 [UniProtKB/Swiss-Prot:Q9LMN7]	Os02g0808100	NA
TraesCS1A02G363300	1.08122	7.83407e-08	NA	Os05g0541700	NA
TraesCS2B02G028000	1.07989	0.00178653	Dirigent protein 5 [UniProtKB/Swiss-Prot:Q9SH66]	NA	AT1G64160
TraesCS7A02G523800	1.07987	6.25303e-06	Cytochrome P450 CYP72A219 [UniProtKB/Swiss-Prot:H2DH21]	Os06g0641200	NA
TraesCS1A02G189100	1.07646	2.17753e-17	Probable E3 ubiquitin-protein ligase XBOS33 [UniProtKB/Swiss-Prot:Q337A0]	Os10g0521600	AT5G07270
TraesCS6B02G404800	1.07625	0.000142802	NA	NA	NA
TraesCS6D02G018400	1.07456	5.20188e-13	Acetylserotonin O-methyltransferase 1 [UniProtKB/Swiss-Prot:Q6EPG8]	NA	NA
TraesCS1A02G243100	1.07374	5.23564e-05	Carbon catabolite repressor protein 4 homolog 4 [UniProtKB/Swiss-Prot:A8MS41]	Os05g0389500	NA
TraesCS1A02G283000	1.07303	2.38464e-07	NA	Os05g0457700	AT5G02130
TraesCS1A02G251100	1.07222	7.91343e-05	GDSL esterase/lipase At1g54790 [UniProtKB/Swiss-Prot:Q3ECP6]	Os05g0401000	AT1G54790
TraesCS7D02G279900	1.07201	3.05604e-14	Serine carboxypeptidase-like 51 [UniProtKB/Swiss-Prot:Q67Y83]	Os08g0560500	AT2G27920
TraesCS1A02G425100	1.07175	6.00239e-08	Jasmonoyl--L-amino acid synthetase GH3.5 [UniProtKB/Swiss-Prot:Q6I581]	Os05g0586200	AT2G46370
TraesCS4A02G093000	1.07173	1.72695e-06	Uncharacterized WD repeat-containing protein C2A9.03 [UniProtKB/Swiss-Prot:Q9Y7K5]	Os03g0386000	AT1G36070
TraesCS1A02G381500	1.07163	4.11784e-25	CDP-diacylglycerol--serine O-phosphatidyltransferase 2 [UniProtKB/Swiss-Prot:Q6I628]	Os05g0554400	AT1G15110
TraesCS1A02G373000	1.07056	1.88502e-08	Putative lipid phosphate phosphatase 3, chloroplastic [UniProtKB/Swiss-Prot:Q8LFD1]	Os05g0549900	AT3G18220
TraesCS1A02G330700	1.07033	9.29277e-08	Carnosine N-methyltransferase [UniProtKB/Swiss-Prot:Q80UY1]	Os05g0511300	AT2G32170
TraesCS7B02G185600	1.07031	2.36711e-05	Protein RER1A [UniProtKB/Swiss-Prot:O48670]	Os08g0309300	AT4G39220
TraesCS1A02G262600	1.07031	2.03394e-13	KH domain-containing protein At1g09660/At1g09670 [UniProtKB/Swiss-Prot:Q8GWR3]	Os05g0419500	AT1G09660
TraesCS1A02G391000	1.06923	1.7034e-13	Probable beta-1,4-xylosyltransferase GT43E [UniProtKB/Swiss-Prot:Q6AT32]	Os05g0559600	NA
TraesCS3D02G255200	1.06816	2.72304e-09	Farnesyl pyrophosphate synthase [UniProtKB/Swiss-Prot:P49353]	Os01g0703400	AT4G17190
TraesCS3A02G486000	1.06523	1.76495e-34	Glucan endo-1,3-beta-glucosidase GI [UniProtKB/Swiss-Prot:P34742]	Os01g0947000	NA
TraesCS5D02G244900	1.06462	2.19987e-13	Abscisic acid 8'-hydroxylase 3 [UniProtKB/Swiss-Prot:Q0J185]	Os09g0457100	AT3G19270
TraesCS1A02G364000	1.06428	9.42405e-53	Late embryogenesis abundant protein, group 3 [UniProtKB/Swiss-Prot:Q03968]	Os05g0542500	NA
TraesCS6D02G289700	1.06196	4.63889e-08	Metalloendoproteinase 3-MMP [UniProtKB/Swiss-Prot:Q5XF51]	Os02g0740700	AT1G24140
TraesCS1A02G352700	1.06176	0.00014728	CLP protease regulatory subunit CLPX1, mitochondrial [UniProtKB/Swiss-Prot:Q9FK07]	Os05g0533900	NA
TraesCS5D02G386900	1.06167	7.23922e-07	Organic cation/carnitine transporter 7 [UniProtKB/Swiss-Prot:Q940M4]	Os03g0638200	AT3G13050
TraesCS5A02G318000	1.0582	1.69214e-05	Cytochrome P450 71A1 [UniProtKB/Swiss-Prot:P24465]	Os09g0530300	NA
TraesCSU02G246100	1.0578	8.89634e-13	50S ribosomal protein L32, chloroplastic [UniProtKB/Swiss-Prot:Q95H45]	CAA33951	NA
TraesCS2D02G178900	1.05711	0.00169462	NA	Os07g0611600	NA
TraesCS1A02G316900	1.05483	6.71336e-40	Protein translation factor SUI1 homolog [UniProtKB/Swiss-Prot:Q0D5W6]	Os05g0498400	AT1G54290
TraesCS3B02G262700	1.05228	0.00116895	NA	Os01g0647200	NA
TraesCS6B02G353600	1.05087	4.85705e-10	NA	Os02g0774200	NA
TraesCS5B02G056800	1.05063	0.00371947	L-type lectin-domain containing receptor kinase IX.1 [UniProtKB/Swiss-Prot:Q9LXA5]	Os12g0608500	NA
TraesCS1A02G441100	1.04894	4.2958e-07	Protein ANTAGONIST OF LIKE HETEROCHROMATIN PROTEIN 1 [UniProtKB/Swiss-Prot:Q94K49]	Os05g0593000	AT5G12010
TraesCS5B02G197700	1.04865	9.37727e-06	Homeobox-leucine zipper protein HOX25 [UniProtKB/Swiss-Prot:A3BYC1]	Os09g0379600	NA
TraesCS1A02G186300	1.04843	0.00666288	Probable glutathione S-transferase GSTU6 [UniProtKB/Swiss-Prot:Q06398]	Os10g0530400	NA
TraesCS1A02G243700	1.04648	4.3009e-08	Probable transmembrane GTPase FZO-like, chloroplastic [UniProtKB/Swiss-Prot:Q1KPV0]	Os05g0390100	NA
TraesCSU02G098500	1.04566	3.77692e-06	Chaperone protein dnaJ 8, chloroplastic [UniProtKB/Swiss-Prot:Q9SAG8]	NA	NA
TraesCS6B02G170300	1.0456	0.00166313	NA	NA	NA
TraesCS6B02G356200	1.04458	6.52464e-09	1-aminocyclopropane-1-carboxylate oxidase 3 [UniProtKB/Swiss-Prot:Q08507]	Os02g0771600	AT1G05010
TraesCS1A02G255800	1.04302	7.45014e-56	1-deoxy-D-xylulose-5-phosphate synthase 1, chloroplastic [UniProtKB/Swiss-Prot:O22567]	Os05g0408900	AT4G15560
TraesCS4A02G066200	1.03783	8.72923e-21	Sugar transport protein MST4 [UniProtKB/Swiss-Prot:Q10PW9]	Os03g0218400	AT5G26340
TraesCS3B02G199800	1.03727	0.00102996	NA	NA	AT3G62070
TraesCS6B02G401700	1.03661	0.0019685	NA	NA	NA
TraesCS1A02G270700	1.03636	6.60904e-24	Subtilisin-like protease SBT3.8 [UniProtKB/Swiss-Prot:Q9SZY3]	Os05g0432700	AT1G71950
TraesCS6A02G063800	1.0358	0.00203487	NA	NA	NA
TraesCS2D02G136100	1.03556	6.31811e-05	NA	Os07g0656700	AT5G13720
TraesCS4D02G182800	1.03542	1.85437e-08	Calcium-binding protein CP1 [UniProtKB/Swiss-Prot:Q9FDX6]	Os03g0310800	NA
TraesCS4B02G234300	1.03479	0.000362908	Uncharacterized protein At1g01500 [UniProtKB/Swiss-Prot:Q8GUH2]	Os03g0228200	NA
TraesCS5A02G294600	1.03475	3.12342e-07	U-box domain-containing protein 33 [UniProtKB/Swiss-Prot:Q8GUH1]	Os09g0511000	NA
TraesCS2D02G534400	1.03468	0.00574945	Receptor-like serine/threonine-protein kinase SD1-8 [UniProtKB/Swiss-Prot:O81905]	Os04g0634400	NA
TraesCS3B02G187700	1.03431	0.0019747	50S ribosomal protein L14, chloroplastic [UniProtKB/Swiss-Prot:Q95H51]	CAA33932	ATCG00780
TraesCS3A02G377600	1.03245	2.51703e-13	Fructose-1,6-bisphosphatase, cytosolic [UniProtKB/Swiss-Prot:Q43139]	Os01g0866400	AT1G43670
TraesCS4D02G120400	1.03238	1.85813e-17	Root phototropism protein 2 [UniProtKB/Swiss-Prot:Q682S0]	Os11g0118300	NA
TraesCS2A02G136100	1.03236	0.00137994	Lipase [UniProtKB/Swiss-Prot:P19515]	Os07g0668700	AT5G18640
TraesCS4A02G189600	1.03218	0.00104457	Type I inositol polyphosphate 5-phosphatase 10 [UniProtKB/Swiss-Prot:A8MR21]	NA	AT5G04980
TraesCS5B02G015500	1.03118	1.5492e-16	Thaumatin-like protein [UniProtKB/Swiss-Prot:P81370]	Os12g0630200	AT4G11650
TraesCS1A02G235100	1.03106	1.09783e-32	Diacylglycerol kinase 1 [UniProtKB/Swiss-Prot:Q39017]	Os03g0425300	AT5G07920
TraesCS1D02G343300	1.03088	9.52024e-06	NA	Os05g0520600	NA
TraesCS6D02G310900	1.03088	9.79377e-05	Sugar transporter ERD6-like 16 [UniProtKB/Swiss-Prot:Q8LBI9]	Os03g0363500	AT5G18840
TraesCS1A02G369900	1.03024	0.00281291	Uncharacterized protein At4g14342 [UniProtKB/Swiss-Prot:P58728]	Os08g0444100	AT3G23325
TraesCS4A02G488900	1.0302	0.000471891	G-type lectin S-receptor-like serine/threonine-protein kinase LECRK2 [UniProtKB/Swiss-Prot:A2XQD3]	NA	NA
TraesCS5B02G129700	1.0295	1.50343e-05	Heat shock cognate 70 kDa protein 2 [UniProtKB/Swiss-Prot:P27322]	Os11g0703900	AT5G02500
TraesCS4B02G341500	1.02939	0.000550102	Serine carboxypeptidase-like 19 [UniProtKB/Swiss-Prot:Q8VZU3]	Os04g0176400	NA
TraesCS5B02G513700	1.02843	5.13755e-11	NA	NA	NA
TraesCS1A02G411600	1.02749	8.52877e-53	CTP synthase [UniProtKB/Swiss-Prot:Q54V77]	Os05g0573300	AT3G12670
TraesCS1A02G285200	1.02655	4.56042e-22	Ubiquitin-conjugating enzyme E2 7 [UniProtKB/Swiss-Prot:P25868]	Os05g0460200	AT3G55380
TraesCS2B02G530100	1.02633	1.22183e-16	Farnesyl pyrophosphate synthase [UniProtKB/Swiss-Prot:Q4JHN6]	Os04g0657100	AT4G17190
TraesCS5D02G568500	1.02473	4.78581e-14	Probable cytokinin riboside 5'-monophosphate phosphoribohydrolase LOGL5 [UniProtKB/Swiss-Prot:Q84M85]	Os03g0857900	AT5G06300
TraesCS3D02G481400	1.02441	1.55162e-40	Glucan endo-1,3-beta-glucosidase GI [UniProtKB/Swiss-Prot:P34742]	Os01g0947000	NA
TraesCS7B02G209600	1.02417	7.16199e-07	Purine-uracil permease NCS1 [UniProtKB/Swiss-Prot:Q9LZD0]	Os02g0666700	NA
TraesCS6A02G322900	1.02389	0.00382663	NA	Os02g0774200	NA
TraesCS1A02G371600	1.02368	9.63258e-06	Probable protein phosphatase 2C 71 [UniProtKB/Swiss-Prot:Q339D2]	NA	NA
TraesCS1B02G470800	1.02322	6.35264e-07	Probable esterase D14L [UniProtKB/Swiss-Prot:Q10J20]	Os05g0590300	NA
TraesCS1A02G228800	1.02312	0.00226827	Histone H3.2 [UniProtKB/Swiss-Prot:P68428]	Os04g0419600	AT5G10400
TraesCS1A02G305400	1.0227	2.35127e-10	Uncharacterized protein At5g19025 [UniProtKB/Swiss-Prot:P0C8Q9]	Os05g0488500	NA
TraesCS2D02G098200	1.0221	1.76714e-05	Probable serine/threonine-protein kinase PBL4 [UniProtKB/Swiss-Prot:Q5PP29]	Os07g0686800	AT1G69790
TraesCS2A02G348200	1.02124	0.00238236	PTI1-like tyrosine-protein kinase 3 [UniProtKB/Swiss-Prot:B9DFG5]	Os04g0509000	AT3G59350
TraesCS5B02G236300	1.02009	3.40394e-06	Mitochondrial phosphate carrier protein 2, mitochondrial [UniProtKB/Swiss-Prot:Q9M2Z8]	Os09g0454600	AT3G48850
TraesCS5A02G263100	1.01945	0.000272297	Tonoplast dicarboxylate transporter [UniProtKB/Swiss-Prot:Q8LG88]	Os09g0484900	AT5G47560
TraesCS3A02G021900	1.01643	2.43905e-06	Cytochrome P450 709B2 [UniProtKB/Swiss-Prot:F4IK45]	Os07g0419000	NA
TraesCS4A02G085000	1.01607	0.00417482	IST1 homolog [UniProtKB/Swiss-Prot:P53990]	Os03g0257500	NA
TraesCS5D02G463900	1.01369	1.43277e-15	Exocyst complex component EXO84B [UniProtKB/Swiss-Prot:Q9LTB0]	Os03g0804400	AT1G10385
TraesCS5A02G407700	1.01287	3.58312e-30	Malate dehydrogenase, glyoxysomal [UniProtKB/Swiss-Prot:Q42972]	Os03g0773800	AT2G22780
TraesCS1B02G205500	1.01265	0.0003145	NA	NA	NA
TraesCS7B02G256000	1.01195	7.39876e-07	Chitinase 1 [UniProtKB/Swiss-Prot:Q9SLP4]	Os10g0416500	NA
TraesCS6B02G041200	1.01168	7.98108e-16	Subtilisin-like protease SBT3.8 [UniProtKB/Swiss-Prot:Q9SZY3]	Os01g0794800	NA
TraesCS1A02G430200	1.01089	0.00323307	Protein HYPER-SENSITIVITY-RELATED 4 [UniProtKB/Swiss-Prot:Q8VZG2]	Os05g0588900	AT4G05340
TraesCS1A02G366400	1.01014	5.92644e-10	Chaperone protein dnaJ 10 [UniProtKB/Swiss-Prot:Q8GYX8]	Os05g0543700	AT4G39150
TraesCS3D02G223400	1.0099	2.25883e-09	NA	Os01g0639600	NA
TraesCS5D02G338200	1.00861	2.95259e-05	Probable aquaporin PIP2-7 [UniProtKB/Swiss-Prot:Q651D5]	Os09g0541000	AT4G35100
TraesCS1A02G409100	1.00597	0.00614027	Putative F-box/LRR-repeat protein At5g02700 [UniProtKB/Swiss-Prot:Q9LZ15]	Os05g0571700	NA
TraesCS4D02G099000	1.00484	1.1733e-11	NA	Os11g0199801	NA
TraesCS1D02G215900	1.00344	1.98803e-13	Pyruvate kinase isozyme G, chloroplastic [UniProtKB/Swiss-Prot:Q40546]	Os10g0571200	AT1G32440
TraesCS1A02G373800	1.00093	0.00187743	Reticulon-like protein B9 [UniProtKB/Swiss-Prot:Q9LJQ5]	Os05g0550250	AT3G18260
TraesCS1A02G274400	1.00033	9.69645e-22	Actin-7 [UniProtKB/Swiss-Prot:P0C540]	Os05g0438800	AT5G09810
TraesCS1D02G444100	0.999872	0.000106397	Probable esterase D14L [UniProtKB/Swiss-Prot:Q10J20]	Os05g0590300	NA
TraesCS3B02G537800	0.999638	3.50735e-05	U-box domain-containing protein 43 [UniProtKB/Swiss-Prot:Q9SFX2]	Os01g0948500	NA
TraesCS1A02G248200	0.999498	6.60543e-08	Rhomboid-like protein 14, mitochondrial [UniProtKB/Swiss-Prot:Q8RXW0]	Os01g0283500	NA
TraesCS6B02G004400	0.998646	5.37129e-11	Glycerate dehydrogenase HPR, peroxisomal [UniProtKB/Swiss-Prot:Q9C9W5]	Os02g0101500	AT1G68010
TraesCS2B02G515800	0.997032	0.000698001	Myb family transcription factor PHL5 [UniProtKB/Swiss-Prot:Q0WVU3]	Os04g0665600	NA
TraesCS4B02G107300	0.996231	2.78288e-06	NAD(P)H-quinone oxidoreductase subunit T, chloroplastic [UniProtKB/Swiss-Prot:Q9SMS0]	Os11g0216100	AT4G09350
TraesCS4A02G331100	0.995906	0.00531582	ABC transporter G family member 48 [UniProtKB/Swiss-Prot:Q8GU84]	Os02g0318500	AT1G66950
TraesCS5B02G412500	0.99555	1.65015e-28	Malate dehydrogenase, glyoxysomal [UniProtKB/Swiss-Prot:Q42972]	Os03g0773800	AT2G22780
TraesCS2A02G432800	0.994972	1.95978e-06	Plant intracellular Ras-group-related LRR protein 1 [UniProtKB/Swiss-Prot:Q7XNY1]	Os04g0605300	AT4G29880
TraesCS1A02G270800	0.993037	6.84559e-13	Serine/threonine-protein kinase SAPK4 [UniProtKB/Swiss-Prot:Q5N942]	Os01g0869900	AT5G50000
TraesCS5D02G432900	0.990978	1.1361e-44	Peroxisomal (S)-2-hydroxy-acid oxidase GLO1 [UniProtKB/Swiss-Prot:Q10CE4]	Os03g0786100	AT3G14420
TraesCS6A02G283500	0.990309	1.2596e-10	Aspartyl protease family protein At5g10770 [UniProtKB/Swiss-Prot:Q8S9J6]	Os02g0720600	NA
TraesCS2B02G286400	0.989648	3.12547e-08	Potassium transporter 27 [UniProtKB/Swiss-Prot:Q84MS4]	Os07g0102100	NA
TraesCS1A02G413900	0.989417	9.43632e-16	Proteasome subunit beta type-6 [UniProtKB/Swiss-Prot:Q8LD27]	Os06g0139900	AT4G31300
TraesCS5D02G440900	0.98922	7.51859e-08	Scopoletin glucosyltransferase [UniProtKB/Swiss-Prot:Q9AT54]	Os03g0757100	NA
TraesCS5D02G417600	0.989156	1.2199e-28	Malate dehydrogenase, glyoxysomal [UniProtKB/Swiss-Prot:Q42972]	Os03g0773800	AT2G22780
TraesCS1A02G420100	0.988878	5.8768e-07	NA	Os05g0581700	NA
TraesCS2D02G432800	0.988432	1.17361e-21	E3 ubiquitin-protein ligase MBR2 [UniProtKB/Swiss-Prot:O49500]	Os04g0603200	NA
TraesCS6B02G271000	0.987748	1.47979e-14	Protein indeterminate-domain 4, chloroplastic [UniProtKB/Swiss-Prot:Q8GYC1]	Os02g0672100	NA
TraesCS5B02G490600	0.987413	0.00259965	Zinc finger protein ZAT12 [UniProtKB/Swiss-Prot:Q42410]	Os03g0820300	NA
TraesCS4B02G097200	0.987097	0.000705868	Very-long-chain aldehyde decarbonylase GL1-10 [UniProtKB/Swiss-Prot:Q9AV39]	Os03g0108500	AT4G22756
TraesCS6A02G100300	0.986349	0.000142147	Acyltransferase-like protein At1g54570, chloroplastic [UniProtKB/Swiss-Prot:Q9ZVN2]	Os01g0361500	NA
TraesCS1A02G426800	0.986332	1.80836e-05	NA	Os05g0586700	NA
TraesCS3D02G523300	0.985975	1.44052e-09	Photosystem II D2 protein [UniProtKB/Swiss-Prot:B1VKH0]	CAA34013	ATCG00270
TraesCS5A02G433200	0.985882	1.50964e-05	Scopoletin glucosyltransferase [UniProtKB/Swiss-Prot:Q9AT54]	Os03g0808200	NA
TraesCS4B02G142100	0.983767	1.97525e-13	NA	NA	NA
TraesCS3B02G339300	0.983207	0.00160101	O-acyltransferase WSD1 [UniProtKB/Swiss-Prot:Q93ZR6]	Os01g0770000	NA
TraesCS1A02G427000	0.983098	3.10606e-15	Probable protein phosphatase 2C 52 [UniProtKB/Swiss-Prot:Q6L5C4]	Os05g0587100	AT4G31750
TraesCS1B02G077300	0.980927	0.000263796	D-ribulose kinase [UniProtKB/Swiss-Prot:Q8L794]	Os07g0409200	AT2G21370
TraesCS1A02G374500	0.979287	0.00185855	Probable non-specific lipid-transfer protein AKCS9 [UniProtKB/Swiss-Prot:Q43681]	Os05g0550600	AT3G18280
TraesCS6B02G077800	0.979256	4.34086e-11	NA	Os02g0119600	NA
TraesCS6B02G324800	0.976347	1.35329e-08	Probable potassium transporter 16 [UniProtKB/Swiss-Prot:Q84MS3]	Os02g0730300	NA
TraesCS1B02G174600	0.975508	3.90712e-45	NA	NA	NA
TraesCS5B02G491200	0.975157	2.72161e-07	Zinc finger protein ZAT18 [UniProtKB/Swiss-Prot:Q9LFG0]	Os03g0820300	NA
TraesCS2B02G521100	0.974251	3.05505e-05	Callose synthase 12 [UniProtKB/Swiss-Prot:Q9ZT82]	Os01g0672500	AT4G03550
TraesCS5D02G504800	0.973361	4.04988e-08	Mannan endo-1,4-beta-mannosidase 4 [UniProtKB/Swiss-Prot:Q10B67]	Os03g0828500	NA
TraesCS1A02G374400	0.971699	5.00022e-23	Probable non-specific lipid-transfer protein AKCS9 [UniProtKB/Swiss-Prot:Q43681]	Os05g0550600	AT3G18280
TraesCS5B02G321800	0.971315	1.35869e-52	Chaperone protein ClpD1, chloroplastic [UniProtKB/Swiss-Prot:Q6H795]	Os02g0526400	AT5G51070
TraesCS5A02G524400	0.971149	1.95283e-10	Peroxisomal membrane protein 11-1 [UniProtKB/Swiss-Prot:Q10SM7]	Os03g0117100	AT3G61070
TraesCS5A02G369100	0.970769	3.27939e-05	NA	NA	NA
TraesCS3D02G501500	0.970315	0.000353347	NA	NA	NA
TraesCS1A02G446000	0.969265	0.0033857	NA	NA	NA
TraesCS3D02G354300	0.967834	2.67442e-07	Photosystem II reaction center PSB28 protein, chloroplastic [UniProtKB/Swiss-Prot:Q0JG75]	Os01g0938100	AT4G28660
TraesCS1A02G357900	0.967658	2.39187e-26	Probable aldehyde dehydrogenase [UniProtKB/Swiss-Prot:Q40255]	Os05g0536400	AT5G62530
TraesCS4B02G122300	0.967486	1.19146e-20	Root phototropism protein 2 [UniProtKB/Swiss-Prot:Q682S0]	Os11g0118300	NA
TraesCS5A02G424400	0.967461	2.50752e-31	Peroxisomal (S)-2-hydroxy-acid oxidase GLO1 [UniProtKB/Swiss-Prot:Q10CE4]	Os03g0786100	AT3G14420
TraesCS7B02G034400	0.967175	0.00045466	NA	Os07g0170200	AT2G23840
TraesCS7D02G437000	0.96698	1.1562e-11	Synaptotagmin-3 [UniProtKB/Swiss-Prot:Q7XA06]	Os06g0685300	AT5G04220
TraesCS3B02G098700	0.966937	8.24929e-16	Chaperone protein dnaJ 20, chloroplastic [UniProtKB/Swiss-Prot:Q9SDN0]	Os01g0101700	NA
TraesCS1B02G377600	0.966079	3.34717e-07	Protein CONSERVED IN THE GREEN LINEAGE AND DIATOMS 27, chloroplastic [UniProtKB/Swiss-Prot:Q9FN15]	Os05g0539900	NA
TraesCS1A02G305800	0.966013	0.000791467	Type I inositol polyphosphate 5-phosphatase 10 [UniProtKB/Swiss-Prot:A8MR21]	Os05g0489000	AT5G04980
TraesCS1A02G251900	0.965642	0.000586646	Probable aspartic proteinase GIP2 [UniProtKB/Swiss-Prot:P0DO21]	Os05g0402900	NA
TraesCS1A02G413300	0.964899	7.42873e-05	NA	Os05g0574700	AT2G25605
TraesCS6B02G355900	0.964842	0.00060326	1-aminocyclopropane-1-carboxylate oxidase 1 [UniProtKB/Swiss-Prot:A2Z1W9]	Os02g0771600	AT1G05010
TraesCS1A02G433300	0.964731	5.10614e-05	NA	Os05g0105500	AT1G33490
TraesCS7D02G271600	0.964184	5.85616e-12	Flavonoid 3'-monooxygenase CYP75B137 [UniProtKB/Swiss-Prot:A0A4D6Q415]	Os08g0547900	NA
TraesCS2B02G459100	0.963577	7.70528e-10	Ubiquinol oxidase 1b, mitochondrial [UniProtKB/Swiss-Prot:O82766]	Os04g0600300	AT3G22370
TraesCS6D02G243900	0.963357	0.000100975	Uncharacterized methyltransferase At1g78140, chloroplastic [UniProtKB/Swiss-Prot:Q8LBV4]	Os08g0411200	NA
TraesCS3D02G370700	0.962716	2.45481e-16	Fructose-1,6-bisphosphatase, cytosolic [UniProtKB/Swiss-Prot:Q43139]	Os01g0866400	AT1G43670
TraesCS3A02G142700	0.96247	1.84285e-11	Protein DJ-1 homolog B [UniProtKB/Swiss-Prot:Q9MAH3]	Os01g0217500	AT3G14990
TraesCS7B02G441100	0.961963	2.87925e-11	Cytochrome P450 72A14 [UniProtKB/Swiss-Prot:Q9LUC6]	Os01g0628900	NA
TraesCS2D02G254500	0.961771	5.05398e-15	Uncharacterized oxidoreductase At1g06690, chloroplastic [UniProtKB/Swiss-Prot:Q94A68]	Os07g0143000	AT1G06690
TraesCS1A02G234200	0.96143	2.46065e-14	Heterogeneous nuclear ribonucleoprotein 1 [UniProtKB/Swiss-Prot:Q8W034]	Os05g0376000	AT4G36960
TraesCS5D02G324300	0.960187	0.000962084	Cytochrome P450 71A9 [UniProtKB/Swiss-Prot:O81970]	Os09g0530300	NA
TraesCS1A02G273000	0.959332	1.30457e-07	bZIP transcription factor 12 [UniProtKB/Swiss-Prot:Q0JHF1]	Os05g0437700	AT1G43700
TraesCS1A02G236700	0.959252	0.000336148	Succinate dehydrogenase subunit 4, mitochondrial [UniProtKB/Swiss-Prot:Q942X4]	Os05g0372000	NA
TraesCS1A02G442400	0.959207	6.94599e-21	TATA-binding protein-associated factor BTAF1 [UniProtKB/Swiss-Prot:B5BT18]	Os02g0161300	AT3G54280
TraesCS5B02G236500	0.9585	1.94496e-05	Abscisic acid 8'-hydroxylase 3 [UniProtKB/Swiss-Prot:Q0J185]	Os09g0457100	AT3G19270
TraesCS1A02G363600	0.957443	0.00210437	Jacalin-related lectin 19 [UniProtKB/Swiss-Prot:Q9SSM3]	Os05g0541800	NA
TraesCS6D02G305400	0.95664	9.60567e-18	1-aminocyclopropane-1-carboxylate oxidase 3 [UniProtKB/Swiss-Prot:Q08507]	Os02g0771600	AT1G05010
TraesCS1A02G160200	0.956562	0.000113532	Probable N-succinyldiaminopimelate aminotransferase DapC [UniProtKB/Swiss-Prot:P9WPZ5]	Os10g0484700	NA
TraesCS1D02G361500	0.955736	3.69342e-16	Type IV inositol polyphosphate 5-phosphatase 3 [UniProtKB/Swiss-Prot:Q8H0Z6]	Os05g0535600	AT1G71710
TraesCS2D02G000200	0.955584	0.002721	Probable NAD(P)H-dependent oxidoreductase 1 [UniProtKB/Swiss-Prot:Q7G764]	Os04g0167800	NA
TraesCS7D02G536800	0.953872	4.48798e-12	Glycosyltransferase family 92 protein Os08g0121900 [UniProtKB/Swiss-Prot:Q6YRM6]	Os06g0727900	NA
TraesCS3D02G261800	0.95232	7.39072e-05	LEAF RUST 10 DISEASE-RESISTANCE LOCUS RECEPTOR-LIKE PROTEIN KINASE-like 2.1 [UniProtKB/Swiss-Prot:Q9FF31]	Os05g0550700	AT1G67000
TraesCS1D02G114700	0.952093	2.03905e-05	Glycerophosphodiester phosphodiesterase GDPD6 [UniProtKB/Swiss-Prot:Q9SD81]	Os03g0603600	AT5G08030
TraesCS5A02G465200	0.951729	1.80913e-13	Triacylglycerol lipase SDP1 [UniProtKB/Swiss-Prot:Q9LZA6]	Os03g0810900	AT5G04040
TraesCS3B02G132700	0.951171	4.14743e-05	NA	NA	NA
TraesCS1A02G411100	0.951083	2.58855e-06	Ethylene-responsive transcription factor ERF061 [UniProtKB/Swiss-Prot:Q9C7W2]	Os05g0572000	NA
TraesCS1B02G127900	0.950601	8.35209e-11	Leucine aminopeptidase 2, chloroplastic [UniProtKB/Swiss-Prot:Q6K669]	Os02g0794700	AT2G24200
TraesCS1B02G234900	0.949934	7.9537e-15	NA	NA	AT2G40095
TraesCS2D02G348900	0.948103	0.000222305	Chitinase 5 [UniProtKB/Swiss-Prot:Q7Y1Z0]	Os04g0494100	AT3G54420
TraesCS7D02G014200	0.947822	0.00598706	Protein DETOXIFICATION 33 [UniProtKB/Swiss-Prot:Q9SX83]	Os01g0766000	AT1G47530
TraesCS1A02G422900	0.947312	0.00115564	Glucan endo-1,3-beta-glucosidase 13 [UniProtKB/Swiss-Prot:Q9FJU9]	Os05g0495900	NA
TraesCS4A02G230900	0.946766	2.31006e-09	Glycosyltransferase family 92 protein Os08g0121900 [UniProtKB/Swiss-Prot:Q6YRM6]	NA	NA
TraesCS1A02G256300	0.946411	1.18458e-23	NA	Os05g0394900	NA
TraesCS1A02G295800	0.945992	0.000700194	UPF0098 protein MTH_273 [UniProtKB/Swiss-Prot:O26373]	Os05g0468800	AT5G01300
TraesCS7A02G305200	0.945203	0.000385122	NAC domain-containing protein 21/22 [UniProtKB/Swiss-Prot:Q84TE6]	Os08g0157900	NA
TraesCS4B02G203100	0.943731	1.56691e-12	Photosynthetic NDH subunit of lumenal location 1, chloroplastic [UniProtKB/Swiss-Prot:O80634]	Os03g0279950	AT2G39470
TraesCS5A02G490100	0.943592	7.36171e-07	NA	Os03g0128800	NA
TraesCS1A02G330500	0.942954	8.69425e-19	Serine/threonine-protein kinase tricorner [UniProtKB/Swiss-Prot:Q2LZZ7]	Os05g0511400	AT4G14350
TraesCS1D02G305200	0.941864	0.00127001	Myb-related protein 1 [UniProtKB/Swiss-Prot:Q9FK47]	Os05g0488600	NA
TraesCS5A02G502800	0.940958	6.15863e-12	ABC transporter G family member 45 [UniProtKB/Swiss-Prot:Q8GU82]	Os08g0544400	AT1G66950
TraesCS4D02G104200	0.940055	0.00342819	NAD(P)H-quinone oxidoreductase subunit T, chloroplastic [UniProtKB/Swiss-Prot:Q9SMS0]	Os11g0216100	AT4G09350
TraesCS1A02G358700	0.939386	1.03353e-05	Cytosolic sulfotransferase 17 [UniProtKB/Swiss-Prot:Q9FZ80]	NA	AT4G26280
TraesCS6B02G401300	0.93934	9.85207e-10	NA	NA	NA
TraesCS2B02G260200	0.938707	1.77271e-36	Protein MET1, chloroplastic [UniProtKB/Swiss-Prot:Q94BS2]	Os07g0171100	AT1G55480
TraesCS3D02G033800	0.93799	1.52061e-10	Bowman-Birk type trypsin inhibitor [UniProtKB/Swiss-Prot:P12940]	Os01g0124600	NA
TraesCS3B02G200000	0.937879	0.00198694	NA	Os03g0559700	NA
TraesCS1A02G388000	0.936566	3.69426e-10	Probable ubiquitin-conjugating enzyme E2 25 [UniProtKB/Swiss-Prot:Q9LUQ5]	Os05g0557600	NA
TraesCS1A02G422400	0.936229	7.49147e-11	NA	Os05g0583500	NA
TraesCS5B02G159000	0.935203	6.61215e-12	Receptor like protein kinase S.2 [UniProtKB/Swiss-Prot:O48837]	Os09g0314800	NA
TraesCS1A02G286000	0.935168	9.60238e-07	Coatomer subunit zeta-1 [UniProtKB/Swiss-Prot:Q9MAX5]	Os05g0461000	AT4G08520
TraesCS1A02G263800	0.935128	4.53123e-06	Myosin heavy chain kinase A [UniProtKB/Swiss-Prot:P42527]	Os05g0422300	AT1G21651
TraesCS4D02G302500	0.934484	1.72607e-08	Protein DETOXIFICATION 27 [UniProtKB/Swiss-Prot:Q9FKQ1]	Os03g0188100	AT5G65380
TraesCS4B02G031200	0.933263	0.00277789	1,4-dihydroxy-2-naphthoyl-CoA thioesterase 1 [UniProtKB/Swiss-Prot:Q9SX65]	Os03g0691400	AT1G48320
TraesCS3A02G280600	0.932495	1.13256e-30	BURP domain-containing protein 3 [UniProtKB/Swiss-Prot:Q942D4]	Os01g0733500	NA
TraesCS6D02G076400	0.932201	0.00251538	Aquaporin PIP2-3 [UniProtKB/Swiss-Prot:Q9ATM7]	Os07g0448100	AT3G54820
TraesCS5B02G310800	0.931979	7.07511e-06	Dehydration-responsive element-binding protein 1B [UniProtKB/Swiss-Prot:Q3T5N4]	Os09g0522000	NA
TraesCS1A02G434600	0.931829	8.89616e-06	NA	NA	NA
TraesCS3B02G462800	0.930876	8.26103e-16	Cis-3-alkyl-4-alkyloxetan-2-one decarboxylase [UniProtKB/Swiss-Prot:Q8EG65]	Os01g0919700	AT4G12830
TraesCS4A02G017700	0.930575	1.6801e-24	Cyclic dof factor 2 [UniProtKB/Swiss-Prot:Q93ZL5]	Os03g0169600	NA
TraesCS7B02G349100	0.930507	6.98073e-07	Cytochrome P450 72A15 [UniProtKB/Swiss-Prot:Q9LUC5]	Os01g0627500	AT3G14680
TraesCS6B02G296400	0.930027	1.13904e-08	Ubiquinol oxidase 1c, mitochondrial [UniProtKB/Swiss-Prot:Q8W855]	Os02g0700400	AT3G22360
TraesCS4A02G225100	0.929883	1.0379e-15	Probable sucrose-phosphate synthase 5 [UniProtKB/Swiss-Prot:Q53JI9]	Os11g0236100	AT4G10120
TraesCS6A02G327700	0.929092	1.67549e-09	NA	Os02g0506600	NA
TraesCS1A02G301400	0.92818	3.38002e-05	Serine/threonine-protein kinase STN8, chloroplastic [UniProtKB/Swiss-Prot:Q9LZV4]	Os05g0480000	AT5G01920
TraesCS1A02G367000	0.927864	7.54133e-11	Mitogen-activated protein kinase kinase kinase 17 [UniProtKB/Swiss-Prot:O80888]	Os05g0545400	NA
TraesCS2A02G438300	0.926923	1.96168e-18	Ubiquinol oxidase 1b, mitochondrial [UniProtKB/Swiss-Prot:O82766]	Os04g0600300	AT3G22370
TraesCS1A02G327200	0.92685	4.04451e-19	Signal recognition particle 54 kDa protein 2 [UniProtKB/Swiss-Prot:P49969]	Os05g0509500	AT1G48900
TraesCS3A02G146500	0.92684	1.04383e-05	NA	Os01g0222600	NA
TraesCS5D02G467100	0.925822	1.72408e-17	NA	Os03g0806600	NA
TraesCS1A02G256400	0.925675	5.83377e-12	Cysteine proteinase inhibitor 3 [UniProtKB/Swiss-Prot:Q6I570]	Os05g0409300	AT2G40880
TraesCS1A02G235000	0.925631	4.70454e-19	Eukaryotic peptide chain release factor subunit 1-2 [UniProtKB/Swiss-Prot:Q9LPV8]	Os05g0373900	AT1G12920
TraesCS1D02G433600	0.925471	0.000561943	Berberine bridge enzyme-like Cyn d 4 [UniProtKB/Swiss-Prot:Q5QJ60]	Os06g0548100	NA
TraesCS2A02G270200	0.925258	3.06672e-11	WRKY transcription factor WRKY51 [UniProtKB/Swiss-Prot:Q0JEE2]	Os04g0287400	AT4G31550
TraesCS2D02G255600	0.924928	0.00569321	Transcription termination factor MTERF2, chloroplastic [UniProtKB/Swiss-Prot:F4IHL3]	Os07g0134700	AT2G21710
TraesCS4A02G298900	0.924795	2.94787e-10	Two pore potassium channel b [UniProtKB/Swiss-Prot:Q8LIN5]	Os07g0108800	NA
TraesCS1A02G165700	0.924094	1.36348e-34	Protein TIC110, chloroplastic [UniProtKB/Swiss-Prot:Q8LPR9]	Os10g0492300	NA
TraesCS2D02G269200	0.923235	7.61553e-11	WRKY transcription factor WRKY51 [UniProtKB/Swiss-Prot:Q0JEE2]	Os04g0287400	AT4G31550
TraesCS6B02G177100	0.922653	6.26156e-06	Uncharacterized protein L728 [UniProtKB/Swiss-Prot:Q5UNY4]	Os02g0179600	AT5G13210
TraesCS3A02G183800	0.921723	1.76207e-05	Tonoplast dicarboxylate transporter [UniProtKB/Swiss-Prot:Q8LG88]	Os09g0484900	AT5G47560
TraesCS3B02G090400	0.921595	0.000100293	Glutathione hydrolase 3 [UniProtKB/Swiss-Prot:Q9M0G0]	Os01g0151400	AT1G69820
TraesCS5B02G110500	0.921202	3.6536e-09	NA	Os12g0236100	NA
TraesCS1A02G322700	0.921082	9.15096e-07	H/ACA ribonucleoprotein complex non-core subunit NAF1 [UniProtKB/Swiss-Prot:Q52KK4]	Os05g0502800	NA
TraesCS7B02G365300	0.920574	0.000582511	NAC domain-containing protein 21/22 [UniProtKB/Swiss-Prot:Q84TE6]	Os06g0675600	NA
TraesCS1D02G284400	0.920361	3.76568e-11	Probable monofunctional riboflavin biosynthesis protein RIBA 3, chloroplastic [UniProtKB/Swiss-Prot:Q6L506]	Os05g0460600	AT5G59750
TraesCS5B02G561300	0.919443	0.000133875	Probable cytokinin riboside 5'-monophosphate phosphoribohydrolase LOGL5 [UniProtKB/Swiss-Prot:Q84M85]	Os03g0857900	AT5G06300
TraesCS6A02G331900	0.918389	1.09893e-15	NA	Os03g0362200	NA
TraesCS1A02G095800	0.916752	0.00467306	Leucine aminopeptidase 2, chloroplastic [UniProtKB/Swiss-Prot:Q6K669]	Os02g0794700	AT2G24200
TraesCS5D02G403700	0.915905	7.57699e-16	UDP-glycosyltransferase 83A1 [UniProtKB/Swiss-Prot:Q9SGA8]	Os03g0757200	AT3G02100
TraesCS2D02G223000	0.915094	3.30481e-05	Putative cysteine-rich receptor-like protein kinase 20 [UniProtKB/Swiss-Prot:O65479]	Os07g0535800	NA
TraesCS1A02G364400	0.914727	1.64164e-18	Late embryogenesis abundant protein 19 [UniProtKB/Swiss-Prot:P0C5A4]	Os05g0542500	NA
TraesCS5A02G182600	0.914576	0.000541605	Sugar transport protein 14 [UniProtKB/Swiss-Prot:Q8GW61]	Os09g0322000	AT1G77210
TraesCS3A02G118200	0.91443	0.000759248	Serine incorporator 1 [UniProtKB/Swiss-Prot:Q7TNK0]	Os01g0179800	AT3G24460
TraesCS1A02G283800	0.914391	1.33277e-18	ATP-dependent zinc metalloprotease FTSH 8, mitochondrial [UniProtKB/Swiss-Prot:Q0DHL4]	Os05g0458400	AT1G07510
TraesCS3A02G230000	0.912868	3.17515e-54	Carbonic anhydrase, chloroplastic [UniProtKB/Swiss-Prot:P40880]	Os01g0639900	NA
TraesCS2A02G066600	0.9126	0.000392545	Expansin-A1 [UniProtKB/Swiss-Prot:Q7XWU8]	Os04g0228400	AT1G20190
TraesCS7B02G354800	0.912574	0.0025072	Carbonic anhydrase, chloroplastic [UniProtKB/Swiss-Prot:P40880]	Os01g0639900	AT3G01500
TraesCS3B02G236600	0.912471	4.17173e-20	Protein CONSERVED IN THE GREEN LINEAGE AND DIATOMS 27, chloroplastic [UniProtKB/Swiss-Prot:Q9FN15]	Os03g0439700	AT5G67370
TraesCS7B02G205100	0.912265	1.13338e-09	Putative F-box protein PP2-B2 [UniProtKB/Swiss-Prot:Q9ZVR5]	Os08g0150700	NA
TraesCS4A02G031000	0.912175	1.19033e-08	Probable serine/threonine-protein kinase PBL16 [UniProtKB/Swiss-Prot:Q9FM85]	Os03g0159100	AT5G56460
TraesCS6D02G401200	0.912019	4.74392e-12	NA	NA	AT3G19900
TraesCS1B02G138900	0.911059	1.00096e-05	NA	Os05g0179800	AT4G32610
TraesCS1A02G389500	0.910524	2.14619e-25	Protein NINJA homolog 1 [UniProtKB/Swiss-Prot:Q6AT41]	Os05g0558800	NA
TraesCS5A02G063900	0.910337	6.64407e-13	Protein JINGUBANG [UniProtKB/Swiss-Prot:O48716]	Os12g0594000	AT3G18950
TraesCS6B02G402000	0.910106	7.68366e-08	NA	NA	NA
TraesCS3D02G083700	0.909528	5.89746e-10	Chaperone protein dnaJ 20, chloroplastic [UniProtKB/Swiss-Prot:Q9SDN0]	Os01g0101700	NA
TraesCS3A02G045200	0.90885	0.00219585	Cysteine-rich receptor-like protein kinase 41 [UniProtKB/Swiss-Prot:O23081]	NA	NA
TraesCS6A02G271600	0.908599	5.99861e-12	9-cis-epoxycarotenoid dioxygenase NCED1, chloroplastic [UniProtKB/Swiss-Prot:Q6YVJ0]	Os02g0704000	AT4G19170
TraesCS3B02G158500	0.908413	0.00013599	Beta-glucuronosyltransferase GlcAT14B [UniProtKB/Swiss-Prot:Q9LFQ0]	Os01g0201100	AT4G27480
TraesCS1A02G355200	0.908184	1.69675e-18	Hexokinase-2 [UniProtKB/Swiss-Prot:Q2KNB9]	Os05g0532600	AT4G29130
TraesCS1A02G261000	0.907612	7.62886e-18	Guanosine nucleotide diphosphate dissociation inhibitor 1 [UniProtKB/Swiss-Prot:Q96254]	Os05g0418000	AT2G44100
TraesCS6D02G245800	0.907019	6.30199e-08	Ubiquinol oxidase 1c, mitochondrial [UniProtKB/Swiss-Prot:Q8W855]	Os02g0700400	AT3G22360
TraesCS1A02G295200	0.905665	2.50022e-05	UTP--glucose-1-phosphate uridylyltransferase 3, chloroplastic [UniProtKB/Swiss-Prot:F4IY62]	Os05g0468600	AT3G56040
TraesCS6A02G301300	0.903946	5.14007e-05	G-type lectin S-receptor-like serine/threonine-protein kinase At1g34300 [UniProtKB/Swiss-Prot:Q9XID3]	Os06g0241100	AT1G36005
TraesCS1A02G278100	0.903763	2.18765e-08	Arginyl-tRNA--protein transferase 1 [UniProtKB/Swiss-Prot:Q9ZT48]	Os05g0446800	AT5G05700
TraesCS1A02G231100	0.903212	2.35841e-12	Glyoxysomal fatty acid beta-oxidation multifunctional protein MFP-a [UniProtKB/Swiss-Prot:Q39659]	Os05g0362100	AT3G06860
TraesCS2B02G369100	0.903038	3.09068e-07	Chitinase 5 [UniProtKB/Swiss-Prot:Q7Y1Z0]	Os04g0494100	AT2G43590
TraesCS1A02G246600	0.902972	1.17891e-22	Argininosuccinate synthase, chloroplastic [UniProtKB/Swiss-Prot:Q9SZX3]	Os12g0235800	AT4G24830
TraesCS5B02G571400	0.902668	2.83362e-10	Heterogeneous nuclear ribonucleoprotein Q [UniProtKB/Swiss-Prot:Q9ASP6]	NA	NA
TraesCS7B02G133800	0.902302	5.71837e-11	Beta-1,2-xylosyltransferease XAX1 [UniProtKB/Swiss-Prot:Q6Z7I3]	Os06g0470000	NA
TraesCS1A02G399600	0.902223	2.03184e-09	60S ribosomal protein L18a-like protein [UniProtKB/Swiss-Prot:Q8L9S1]	Os05g0564800	NA
TraesCS6A02G093300	0.902003	1.81519e-06	NA	Os02g0131100	NA
TraesCS5A02G478100	0.901989	0.00155603	Zinc finger protein ZAT18 [UniProtKB/Swiss-Prot:Q9LFG0]	Os03g0820300	NA
TraesCS6A02G323000	0.901436	4.7256e-11	NA	Os02g0774200	NA
TraesCS2B02G297700	0.900606	5.47165e-07	RPM1-interacting protein 4 [UniProtKB/Swiss-Prot:Q8GYN5]	Os04g0379600	NA
TraesCS1A02G283900	0.900405	9.21057e-08	Laccase-13 [UniProtKB/Swiss-Prot:P0DKK6]	Os05g0458500	AT2G38080
TraesCS2B02G454500	0.900335	6.92991e-40	Putative xyloglucan endotransglucosylase/hydrolase protein 13 [UniProtKB/Swiss-Prot:Q9FKL8]	Os04g0604900	NA
TraesCS1A02G311400	0.898685	3.74258e-27	Transcription elongation factor SPT6 homolog [UniProtKB/Swiss-Prot:A8MS85]	Os05g0494900	AT1G63210
TraesCS5A02G193500	0.898541	0.00323777	Hypersensitive-induced response protein-like protein 2 [UniProtKB/Swiss-Prot:Q6K550]	Os09g0361200	AT3G01290
TraesCS4D02G059200	0.897217	0.000146411	Thioredoxin-like protein AAED1, chloroplastic [UniProtKB/Swiss-Prot:Q9ZUU2]	Os03g0729200	AT5G65840
TraesCS6A02G172200	0.895737	0.000194134	D-amino-acid transaminase, chloroplastic [UniProtKB/Swiss-Prot:Q8L493]	Os02g0273100	AT5G57850
TraesCS1A02G257300	0.895282	4.97203e-18	Alpha-1,3-arabinosyltransferase XAT3 [UniProtKB/Swiss-Prot:Q10I20]	Os05g0391600	NA
TraesCS5D02G264900	0.892999	0.000237645	NA	Os09g0480600	NA
TraesCS6B02G260200	0.892983	0.00388353	E2F-associated phosphoprotein [UniProtKB/Swiss-Prot:Q5BU09]	Os02g0635700	AT5G08320
TraesCS1B02G461600	0.892875	8.97454e-20	RNA polymerase sigma factor sigE, chloroplastic/mitochondrial [UniProtKB/Swiss-Prot:Q9ZNX9]	Os05g0586600	NA
TraesCS1A02G302800	0.892597	3.52384e-10	KH domain-containing protein SPIN1 [UniProtKB/Swiss-Prot:Q75GR5]	Os05g0481500	AT3G08620
TraesCS6B02G262400	0.89246	8.42586e-20	Probable metal-nicotianamine transporter YSL14 [UniProtKB/Swiss-Prot:Q6H7J6]	Os02g0633300	AT1G65730
TraesCS1A02G388700	0.892385	1.53311e-13	NA	Os05g0557900	NA
TraesCS6A02G181000	0.891105	0.00177604	Premnaspirodiene oxygenase [UniProtKB/Swiss-Prot:A6YIH8]	Os02g0186800	NA
TraesCS7B02G441600	0.891008	0.00429468	Disease resistance protein RGA4 [UniProtKB/Swiss-Prot:F7J0M4]	NA	NA
TraesCS2D02G541900	0.890789	2.12867e-08	Uncharacterized protein At5g50100, chloroplastic [UniProtKB/Swiss-Prot:Q8W485]	Os04g0668800	NA
TraesCS5D02G530800	0.890642	1.47748e-05	Probable thiol methyltransferase 2 [UniProtKB/Swiss-Prot:Q6AWU6]	Os03g0843800	NA
TraesCS1A02G289800	0.890013	0.00247797	NA	Os05g0465000	NA
TraesCS1A02G281400	0.890004	3.64944e-17	Delta-1-pyrroline-5-carboxylate synthase 1 [UniProtKB/Swiss-Prot:O04226]	Os05g0455500	AT3G55610
TraesCS4B02G070000	0.889633	4.41562e-06	Protein DETOXIFICATION 29 [UniProtKB/Swiss-Prot:Q38956]	Os03g0626700	AT3G26590
TraesCS1A02G243000	0.889323	2.32244e-14	Probable folate-biopterin transporter 7 [UniProtKB/Swiss-Prot:Q9XIQ7]	Os05g0389400	AT1G64890
TraesCS1A02G409700	0.888768	1.11912e-05	NA	Os05g0569200	AT5G52960
TraesCS1A02G395600	0.888154	1.8125e-12	Homeobox-DDT domain protein RLT2 [UniProtKB/Swiss-Prot:Q9FFH1]	Os05g0562400	AT5G44180
TraesCS7A02G550300	0.887738	7.6167e-05	Probable serine/threonine-protein kinase PIX13 [UniProtKB/Swiss-Prot:Q9SII6]	Os06g0727400	AT4G35600
TraesCS5D02G163100	0.887725	6.30819e-06	Caffeoylshikimate esterase [UniProtKB/Swiss-Prot:Q9C942]	Os12g0100500	AT3G55180
TraesCS1A02G173800	0.887545	0.000792518	Benzyl alcohol O-benzoyltransferase [UniProtKB/Swiss-Prot:Q8GT20]	Os10g0503300	AT5G17540
TraesCS1A02G238900	0.88739	2.56874e-19	Alpha-glucosidase 2 [UniProtKB/Swiss-Prot:Q9F234]	Os07g0420700	AT3G23640
TraesCS1A02G420500	0.887329	7.39662e-10	DnaJ homolog subfamily C member 2 [UniProtKB/Swiss-Prot:Q7TQ20]	Os05g0562300	AT3G11450
TraesCS3D02G081300	0.887212	2.19899e-06	Light-regulated protein, chloroplastic [UniProtKB/Swiss-Prot:Q03200]	Os01g0102900	AT3G26740
TraesCS4D02G039200	0.886784	0.000104581	Probable plastid-lipid-associated protein 4, chloroplastic [UniProtKB/Swiss-Prot:Q9LU85]	Os03g0704100	AT3G26070
TraesCS7D02G354600	0.885994	0.00666619	Dehydrogenase/reductase SDR family member 12 [UniProtKB/Swiss-Prot:A6QP05]	Os06g0590301	AT4G09750
TraesCS3B02G300300	0.885909	9.54613e-08	O-acyltransferase WSD1 [UniProtKB/Swiss-Prot:Q93ZR6]	Os01g0681000	NA
TraesCS4B02G223000	0.885732	0.00216905	Nuclear transcription factor Y subunit C-2 [UniProtKB/Swiss-Prot:A6BLW4]	Os03g0251350	NA
TraesCS1A02G282700	0.883677	0.00344667	CASP-like protein 5B2 [UniProtKB/Swiss-Prot:Q0DHM7]	Os05g0456500	AT5G02060
TraesCS7B02G277700	0.883501	1.45066e-05	SPX domain-containing protein 1 [UniProtKB/Swiss-Prot:Q69XJ0]	Os06g0603600	AT5G20150
TraesCS5A02G369300	0.883501	5.46267e-06	NA	NA	NA
TraesCS3D02G076300	0.883327	1.69473e-09	Probable folate-biopterin transporter 9, chloroplastic [UniProtKB/Swiss-Prot:O22780]	Os07g0425000	NA
TraesCS3B02G352300	0.881848	3.28194e-15	Receptor-like serine/threonine-protein kinase SD1-8 [UniProtKB/Swiss-Prot:O81905]	Os01g0784200	AT1G61610
TraesCS4D02G176300	0.880008	3.31862e-08	Phospholipid-transporting ATPase 1 [UniProtKB/Swiss-Prot:P98204]	Os03g0326000	NA
TraesCS7A02G309600	0.879945	3.81408e-08	Purine-uracil permease NCS1 [UniProtKB/Swiss-Prot:Q9LZD0]	Os02g0666700	AT5G03555
TraesCS2D02G349000	0.879574	0.00503172	Chitinase 5 [UniProtKB/Swiss-Prot:Q7Y1Z0]	Os04g0494100	AT3G54420
TraesCS3B02G236900	0.879412	0.00110097	Putative transcription factor bHLH041 [UniProtKB/Swiss-Prot:Q9LTS4]	Os01g0575200	NA
TraesCS6B02G404700	0.879171	4.30368e-08	Probable monogalactosyldiacylglycerol synthase 3, chloroplastic [UniProtKB/Swiss-Prot:Q0DWQ1]	Os02g0802700	AT5G20410
TraesCS2B02G456100	0.878945	1.54822e-15	E3 ubiquitin-protein ligase MBR2 [UniProtKB/Swiss-Prot:O49500]	Os04g0603200	NA
TraesCS1A02G442500	0.878266	3.98819e-13	ATP-dependent zinc metalloprotease FTSH 5, mitochondrial [UniProtKB/Swiss-Prot:Q8LQJ8]	Os01g0574500	AT2G26140
TraesCS1A02G404500	0.877633	6.37691e-54	Phytepsin [UniProtKB/Swiss-Prot:P42210]	Os05g0567100	AT1G11910
TraesCS2A02G551600	0.877441	5.00706e-09	NA	Os04g0674000	NA
TraesCS1A02G286900	0.876438	2.75956e-05	Histone H2A.1 [UniProtKB/Swiss-Prot:P25469]	Os05g0461400	AT5G02560
TraesCS2A02G571300	0.876377	1.68298e-13	Cationic peroxidase SPC4 [UniProtKB/Swiss-Prot:P84516]	Os04g0689000	NA
TraesCS1A02G391900	0.876126	0.000425001	Pirin-like protein [UniProtKB/Swiss-Prot:Q9SEE4]	Os08g0364900	AT3G59220
TraesCS5D02G237800	0.875836	0.000753755	High affinity sulfate transporter 2 [UniProtKB/Swiss-Prot:P53392]	Os08g0406400	AT1G78000
TraesCS5B02G504000	0.875571	3.94412e-09	Mannan endo-1,4-beta-mannosidase 4 [UniProtKB/Swiss-Prot:Q10B67]	Os03g0828500	NA
TraesCS6A02G271200	0.874623	9.40013e-06	Uncharacterized methyltransferase At1g78140, chloroplastic [UniProtKB/Swiss-Prot:Q8LBV4]	Os08g0411200	NA
TraesCS1A02G375900	0.874076	0.00170515	Thymidine kinase [UniProtKB/Swiss-Prot:O81263]	Os03g0113100	AT3G07800
TraesCS5B02G294600	0.874065	1.16882e-24	Beta-glucosidase 31 [UniProtKB/Swiss-Prot:B7F7K7]	Os09g0511600	AT1G60270
TraesCS4D02G012700	0.873677	1.70829e-06	Two pore potassium channel b [UniProtKB/Swiss-Prot:Q8LIN5]	Os07g0108800	NA
TraesCS1A02G335900	0.873669	1.92244e-06	Transcription factor VOZ1 [UniProtKB/Swiss-Prot:Q9SGQ0]	Os05g0515700	NA
TraesCS2A02G302900	0.872386	1.87992e-05	NA	Os04g0430600	NA
TraesCS2B02G507700	0.871645	7.96188e-05	Anthocyanidin reductase ((2S)-flavan-3-ol-forming) [UniProtKB/Swiss-Prot:D7U6G6]	Os04g0631000	NA
TraesCS4D02G050700	0.871339	5.11093e-34	UV-B-induced protein At3g17800, chloroplastic [UniProtKB/Swiss-Prot:Q9LVJ0]	Os03g0717900	AT3G17800
TraesCS4B02G229200	0.870971	0.000118623	Zinc finger protein 7 [UniProtKB/Swiss-Prot:Q39266]	Os03g0239300	AT1G66140
TraesCS5D02G328100	0.870019	2.36151e-47	Chaperone protein ClpD1, chloroplastic [UniProtKB/Swiss-Prot:Q6H795]	Os02g0526400	AT5G51070
TraesCS5B02G045100	0.869687	3.12155e-07	Protein WIR1A [UniProtKB/Swiss-Prot:Q01482]	NA	NA
TraesCS6A02G396300	0.869328	0.00373944	LysM domain receptor-like kinase 3 [UniProtKB/Swiss-Prot:F4IB81]	Os02g0819900	NA
TraesCS1A02G112700	0.869178	6.12408e-05	Autophagy-related protein 18d [UniProtKB/Swiss-Prot:Q0WPK3]	Os05g0169200	AT3G56440
TraesCS5A02G236700	0.869155	1.67834e-07	Mitochondrial phosphate carrier protein 2, mitochondrial [UniProtKB/Swiss-Prot:Q9M2Z8]	Os09g0454600	AT3G48850
TraesCS1A02G354600	0.868705	0.00260496	NA	Os03g0430000	NA
TraesCS3B02G148100	0.868392	3.4907e-11	ABC transporter C family member 3 [UniProtKB/Swiss-Prot:Q9LK64]	Os01g0173900	AT1G71330
TraesCS1A02G158600	0.868381	4.9032e-34	NA	NA	NA
TraesCS1A02G251600	0.867856	2.67038e-20	BI1-like protein [UniProtKB/Swiss-Prot:Q94A20]	Os05g0402300	AT4G15470
TraesCS6B02G376200	0.866789	5.23574e-36	Alpha-aminoadipic semialdehyde synthase [UniProtKB/Swiss-Prot:Q9SMZ4]	Os02g0783700	AT4G33150
TraesCS1A02G438600	0.866789	1.25569e-17	Eukaryotic translation initiation factor 5B [UniProtKB/Swiss-Prot:Q10251]	Os05g0592600	AT2G27700
TraesCS1A02G255900	0.866327	6.96381e-09	NA	Os05g0409000	NA
TraesCS4D02G173700	0.866227	2.2006e-17	60S ribosomal protein L10-1 [UniProtKB/Swiss-Prot:Q0ITS8]	Os03g0332500	AT1G14320
TraesCS6A02G041900	0.865039	0.00425915	Polyphenol oxidase F, chloroplastic [UniProtKB/Swiss-Prot:Q08296]	NA	NA
TraesCS7A02G246200	0.864972	2.07425e-13	Probable lipoxygenase 8, chloroplastic [UniProtKB/Swiss-Prot:Q84YK8]	Os08g0509100	NA
TraesCS5D02G435800	0.864866	0.0023335	Indole-3-acetaldehyde oxidase [UniProtKB/Swiss-Prot:O23887]	Os03g0790700	AT3G43600
TraesCS1A02G397200	0.864114	0.00406465	Monothiol glutaredoxin-S5 [UniProtKB/Swiss-Prot:Q5QLR2]	Os01g0667900	NA
TraesCS1A02G281300	0.863475	5.91997e-08	Transcription factor ILR3 [UniProtKB/Swiss-Prot:Q9FH37]	Os05g0455400	NA
TraesCS6A02G082900	0.862543	0.00275964	Aquaporin PIP2-5 [UniProtKB/Swiss-Prot:Q8GRI8]	Os07g0448100	AT3G54820
TraesCS4D02G192600	0.860474	2.65353e-13	Gamma-interferon-responsive lysosomal thiol protein [UniProtKB/Swiss-Prot:Q9SV73]	Os03g0295800	AT1G07080
TraesCS2B02G401500	0.859389	3.31217e-09	Beta-glucosidase 16 [UniProtKB/Swiss-Prot:Q7XSK2]	Os04g0513400	AT4G21760
TraesCS5B02G219700	0.858625	1.13639e-24	Tetraspanin-8 [UniProtKB/Swiss-Prot:Q8S8Q6]	Os09g0425900	AT4G30430
TraesCS1A02G249400	0.857914	1.50075e-14	ARM REPEAT PROTEIN INTERACTING WITH ABF2 [UniProtKB/Swiss-Prot:B9DHT4]	Os05g0398100	AT5G19330
TraesCS7B02G115900	0.857706	2.34947e-08	Aspartyl protease APCB1 [UniProtKB/Swiss-Prot:Q9M9A8]	Os06g0268700	AT1G25510
TraesCS5B02G351200	0.857348	4.27901e-12	NA	Os09g0549600	NA
TraesCS6A02G103300	0.855619	0.00080878	NA	NA	NA
TraesCS1B02G135800	0.855444	2.95238e-25	Metallothionein-like protein 1 [UniProtKB/Swiss-Prot:P43400]	NA	NA
TraesCS1A02G251400	0.854991	5.86679e-10	RNA demethylase ALKBH10B [UniProtKB/Swiss-Prot:Q9ZT92]	Os05g0401500	NA
TraesCS4D02G235500	0.854718	0.000153458	Uncharacterized protein At1g01500 [UniProtKB/Swiss-Prot:Q8GUH2]	Os03g0228200	NA
TraesCS1A02G273900	0.854546	0.000199498	Fructose-1,6-bisphosphatase, cytosolic [UniProtKB/Swiss-Prot:Q9SDL8]	Os01g0866400	AT1G43670
TraesCS4D02G088200	0.853599	2.35241e-12	Probable sucrose-phosphate synthase 5 [UniProtKB/Swiss-Prot:Q53JI9]	Os11g0236100	AT4G10120
TraesCS1B02G367300	0.85354	0.00209196	NA	NA	AT3G05625
TraesCS2D02G391800	0.853263	7.91301e-12	Pentatricopeptide repeat-containing protein At5g13770, chloroplastic [UniProtKB/Swiss-Prot:Q66GP4]	Os04g0583101	NA
TraesCS1A02G244700	0.853109	8.5438e-09	Mannosylglycoprotein endo-beta-mannosidase [UniProtKB/Swiss-Prot:Q5H7P5]	Os05g0391500	AT1G09010
TraesCS1A02G289900	0.853048	0.000647539	NA	Os05g0465000	NA
TraesCS1A02G066400	0.852681	0.000200605	Dihydrolipoyl dehydrogenase 1, mitochondrial [UniProtKB/Swiss-Prot:Q9M5K3]	Os05g0160000	AT1G48030
TraesCS1A02G344000	0.852552	1.31388e-17	ATP-dependent 6-phosphofructokinase 3 [UniProtKB/Swiss-Prot:Q94AA4]	Os05g0524400	AT4G29220
TraesCS5B02G294400	0.851951	5.78749e-06	Beta-glucosidase 31 [UniProtKB/Swiss-Prot:B7F7K7]	Os09g0511600	NA
TraesCS1A02G340200	0.851597	0.00163562	Probable transcriptional regulatory protein At2g25830 [UniProtKB/Swiss-Prot:O82314]	Os05g0519800	AT2G25830
TraesCS7A02G487400	0.851529	0.000571227	L-lactate dehydrogenase B (Fragment) [UniProtKB/Swiss-Prot:P22989]	NA	NA
TraesCS5B02G262500	0.851452	0.00526591	Tonoplast dicarboxylate transporter [UniProtKB/Swiss-Prot:Q8LG88]	Os09g0484900	AT5G47560
TraesCS6B02G401000	0.851128	3.86449e-09	NA	Os02g0799700	NA
TraesCS4D02G181100	0.850382	3.14013e-05	Transcription factor MYB2 [UniProtKB/Swiss-Prot:Q10MB4]	Os03g0315400	AT3G06490
TraesCS6A02G353700	0.850289	1.02382e-20	Protein TIC 55, chloroplastic [UniProtKB/Swiss-Prot:Q9SK50]	Os02g0792800	AT2G24820
TraesCS3A02G287400	0.849005	2.91527e-05	Probable serine acetyltransferase 1 [UniProtKB/Swiss-Prot:Q8W0E4]	Os01g0720700	AT5G56760
TraesCS5B02G572400	0.848616	3.89158e-14	Glutathione S-transferase T1 [UniProtKB/Swiss-Prot:Q9ZRT5]	Os11g0588300	AT5G41210
TraesCS2B02G048200	0.847182	9.9381e-05	Calvin cycle protein CP12-2, chloroplastic [UniProtKB/Swiss-Prot:Q9LZP9]	Os01g0303000	NA
TraesCS5B02G350900	0.846066	0.00154585	Protein NLP1 [UniProtKB/Swiss-Prot:Q10S83]	Os09g0549450	NA
TraesCS1A02G267300	0.846047	1.23868e-14	Splicing factor 3B subunit 4 [UniProtKB/Swiss-Prot:Q09442]	Os05g0427300	NA
TraesCS1A02G330600	0.846016	7.56739e-13	Regulator of MON1-CCZ1 complex [UniProtKB/Swiss-Prot:Q96DM3]	Os10g0400900	NA
TraesCS6A02G294200	0.845816	0.00196777	Probable potassium transporter 16 [UniProtKB/Swiss-Prot:Q84MS3]	Os02g0730300	NA
TraesCS5B02G228500	0.845565	1.89367e-06	Sulfate transporter 1.3 [UniProtKB/Swiss-Prot:Q9FEP7]	Os08g0406400	AT1G78000
TraesCS1A02G272200	0.845542	7.45264e-06	Protein S-acyltransferase 8 [UniProtKB/Swiss-Prot:Q9SB58]	Os05g0436900	AT5G50020
TraesCS1D02G335900	0.845422	9.31529e-05	Probable magnesium transporter NIPA4 [UniProtKB/Swiss-Prot:Q94AH3]	Os05g0513400	AT4G13800
TraesCS1B02G264900	0.845085	6.82074e-22	Pyruvate, phosphate dikinase 1, chloroplastic [UniProtKB/Swiss-Prot:Q6AVA8]	Os05g0405000	AT4G15530
TraesCS3D02G223300	0.845049	3.97972e-37	Carbonic anhydrase, chloroplastic [UniProtKB/Swiss-Prot:P40880]	Os01g0639900	AT5G14740
TraesCS3D02G334200	0.844754	8.93365e-07	Protein LURP-one-related 8 [UniProtKB/Swiss-Prot:Q9ZVI6]	Os01g0817650	NA
TraesCS1A02G373100	0.844299	1.61042e-06	Phospholipase D alpha 1 [UniProtKB/Swiss-Prot:Q41142]	Os03g0391400	AT3G15730
TraesCS2D02G512400	0.844108	0.00438321	NA	Os08g0416800	NA
TraesCS1A02G367300	0.843427	1.7948e-07	Transcription factor GTE1 [UniProtKB/Swiss-Prot:Q84XV2]	Os06g0138000	NA
TraesCS1A02G346800	0.843417	5.31887e-20	Reticulon-like protein B3 [UniProtKB/Swiss-Prot:Q9SH59]	Os05g0526400	AT2G46170
TraesCS4D02G083000	0.843274	2.61867e-06	Glycosyltransferase family 92 protein Os08g0121900 [UniProtKB/Swiss-Prot:Q6YRM6]	NA	NA
TraesCS4D02G153400	0.843058	1.04473e-06	Nicotianamine aminotransferase 1 [UniProtKB/Swiss-Prot:A0A0P0VI36]	Os11g0644800	NA
TraesCS2A02G084800	0.842867	6.63802e-06	Omega-3 fatty acid desaturase, chloroplastic [UniProtKB/Swiss-Prot:P48619]	Os07g0693800	AT5G05580
TraesCS1A02G402500	0.842172	2.79099e-10	GDP-mannose 3,5-epimerase 1 [UniProtKB/Swiss-Prot:A2Z7B3]	Os10g0417600	AT5G28840
TraesCS5B02G465300	0.840686	8.25287e-12	NA	Os03g0806600	NA
TraesCS3A02G426600	0.840496	6.00088e-09	Cis-3-alkyl-4-alkyloxetan-2-one decarboxylase [UniProtKB/Swiss-Prot:Q8EG65]	Os01g0919700	AT4G12830
TraesCS4D02G329400	0.839322	7.15628e-31	Late embryogenesis abundant protein 19 [UniProtKB/Swiss-Prot:A2Y720]	NA	NA
TraesCS2A02G301500	0.838682	7.3388e-12	Abscisic stress-ripening protein 2 [UniProtKB/Swiss-Prot:P37219]	Os04g0423400	NA
TraesCS1A02G292300	0.838117	6.48927e-09	SelT-like protein [UniProtKB/Swiss-Prot:Q9STZ2]	Os05g0467300	AT5G58640
TraesCS6B02G400400	0.835704	0.000238305	NA	Os02g0799700	NA
TraesCS2D02G179700	0.835555	3.03097e-06	NA	NA	NA
TraesCS4B02G120400	0.835358	3.27018e-08	CBL-interacting protein kinase 14 [UniProtKB/Swiss-Prot:Q2QYM3]	Os11g0113700	AT5G58380
TraesCS3B02G306600	0.835336	2.65609e-05	GDSL esterase/lipase At5g45670 [UniProtKB/Swiss-Prot:Q9FK75]	Os01g0748500	AT5G45670
TraesCS6A02G098600	0.835336	0.0051187	Chloride channel protein CLC-b [UniProtKB/Swiss-Prot:P92942]	Os12g0438600	AT3G27170
TraesCS6A02G254100	0.835234	1.48534e-27	Amino acid transporter AVT3B [UniProtKB/Swiss-Prot:F4ILY9]	Os02g0670900	AT2G42005
TraesCS2D02G481700	0.834347	3.88305e-05	Anthocyanidin reductase ((2S)-flavan-3-ol-forming) [UniProtKB/Swiss-Prot:D7U6G6]	Os04g0630800	NA
TraesCS6B02G280800	0.834296	1.44267e-09	Ethylene-responsive transcription factor 5 [UniProtKB/Swiss-Prot:O80341]	Os02g0655200	AT5G47230
TraesCS1A02G394500	0.833939	2.67211e-05	3-deoxy-manno-octulosonate cytidylyltransferase [UniProtKB/Swiss-Prot:Q9M4G3]	Os05g0561500	AT1G53000
TraesCS5A02G463700	0.833821	0.000134998	UDP-glycosyltransferase 91C1 [UniProtKB/Swiss-Prot:Q9LTA3]	Os03g0804900	NA
TraesCS2B02G529300	0.83353	3.05213e-08	Ribulose bisphosphate carboxylase/oxygenase activase 2, chloroplastic [UniProtKB/Swiss-Prot:Q7X999]	Os04g0658300	AT1G73110
TraesCS3D02G092900	0.833312	1.37932e-22	Galactinol--sucrose galactosyltransferase [UniProtKB/Swiss-Prot:Q5VQG4]	Os01g0170000	AT5G40390
TraesCS1A02G246500	0.832628	0.000898074	Putative leucine-rich repeat receptor-like serine/threonine-protein kinase At2g14440 [UniProtKB/Swiss-Prot:Q9ZQQ7]	Os05g0393100	AT3G05990
TraesCS2B02G604800	0.832576	1.48281e-07	Probable phospholipid hydroperoxide glutathione peroxidase [UniProtKB/Swiss-Prot:Q06652]	Os04g0683850	AT4G11600
TraesCS2A02G097400	0.831057	2.63557e-51	Galactinol synthase 2 [UniProtKB/Swiss-Prot:Q9FXB2]	Os07g0687900	AT2G47180
TraesCS1B02G167800	0.829774	1.21868e-09	Acyltransferase-like protein At1g54570, chloroplastic [UniProtKB/Swiss-Prot:Q9ZVN2]	Os01g0362100	AT1G54570
TraesCS2A02G237200	0.827191	4.53374e-22	Protein MET1, chloroplastic [UniProtKB/Swiss-Prot:Q94BS2]	Os07g0171100	AT1G55480
TraesCS6B02G401100	0.827082	2.61005e-10	NA	Os02g0799700	NA
TraesCS2D02G552700	0.826294	8.86206e-10	NA	Os04g0674000	NA
TraesCS3A02G135700	0.825543	0.000325841	Putative CBL-interacting protein kinase 13 [UniProtKB/Swiss-Prot:Q5QNM6]	Os01g0206300	AT4G18700
TraesCS1A02G427500	0.824813	6.93719e-05	NA	Os05g0587400	NA
TraesCS1A02G378200	0.824723	2.19199e-10	Sulfhydryl oxidase 1 [UniProtKB/Swiss-Prot:Q6AUC6]	Os05g0552500	AT2G01270
TraesCS1A02G358800	0.824535	1.58282e-06	Beta-galactosidase 8 [UniProtKB/Swiss-Prot:Q0DGD7]	Os05g0539400	AT4G26140
TraesCS4A02G454800	0.82363	1.08132e-23	Probable glutathione S-transferase GSTU6 [UniProtKB/Swiss-Prot:Q06398]	NA	NA
TraesCS7D02G055500	0.8235	0.000744182	Probable E3 ubiquitin-protein ligase XBOS36 [UniProtKB/Swiss-Prot:Q4JHE0]	Os06g0128700	NA
TraesCS7A02G134000	0.823428	0.00040612	Calcium-binding protein CBP [UniProtKB/Swiss-Prot:Q2QY10]	Os08g0558100	NA
TraesCS3D02G083400	0.823258	1.78299e-08	Probable inactive shikimate kinase like 1, chloroplastic [UniProtKB/Swiss-Prot:Q9LW20]	Os01g0102600	AT3G26900
TraesCS5D02G483900	0.822727	6.84708e-05	Protein LURP-one-related 15 [UniProtKB/Swiss-Prot:Q9LZX1]	Os03g0816700	AT5G01750
TraesCS3B02G259300	0.82096	4.21258e-40	Carbonic anhydrase, chloroplastic [UniProtKB/Swiss-Prot:P40880]	Os01g0639900	AT5G14740
TraesCS1A02G250900	0.820678	0.000741716	DNA-directed RNA polymerase II subunit RPB7 [UniProtKB/Swiss-Prot:P46279]	Os05g0400700	AT5G59180
TraesCS2A02G593300	0.820663	0.000689952	NDR1/HIN1-like protein 6 [UniProtKB/Swiss-Prot:Q8LD98]	Os04g0677300	NA
TraesCS6B02G414000	0.82051	0.00115035	Wall-associated receptor kinase 2 [UniProtKB/Swiss-Prot:Q9LMP1]	Os02g0808100	NA
TraesCS5B02G394300	0.820494	1.33405e-32	Beta-glucosidase BoGH3B [UniProtKB/Swiss-Prot:A7LXU3]	Os03g0749500	AT5G20950
TraesCS1A02G413000	0.81985	1.0255e-30	GTP-binding nuclear protein Ran-2 [UniProtKB/Swiss-Prot:Q7GD79]	Os05g0574500	AT5G55190
TraesCS6B02G340400	0.818932	0.00274208	NA	Os02g0740600	NA
TraesCS3B02G205800	0.81868	5.95614e-10	Flowering-promoting factor 1-like protein 1 [UniProtKB/Swiss-Prot:Q9LGE3]	Os01g0257300	AT5G24860
TraesCS5D02G479400	0.818552	2.16944e-10	NA	NA	NA
TraesCS1A02G441800	0.816762	2.31678e-11	NA	NA	NA
TraesCS2D02G443500	0.815755	1.44856e-16	UV-B-induced protein At3g17800, chloroplastic [UniProtKB/Swiss-Prot:Q9LVJ0]	Os04g0596300	NA
TraesCS2B02G278500	0.815724	0.00206515	Peroxidase 51 [UniProtKB/Swiss-Prot:Q9SZE7]	Os07g0115300	AT4G37530
TraesCS7D02G306300	0.815412	1.77654e-06	Purine-uracil permease NCS1 [UniProtKB/Swiss-Prot:Q9LZD0]	Os02g0666700	AT5G03555
TraesCS1A02G267900	0.815158	1.19655e-06	Potassium channel AKT2 [UniProtKB/Swiss-Prot:Q75HP9]	Os05g0428700	AT4G22200
TraesCS1A02G275400	0.81479	7.5149e-06	Serine/threonine-protein kinase Nek4 [UniProtKB/Swiss-Prot:Q60DG4]	Os05g0440800	NA
TraesCS6B02G156000	0.813967	0.00103511	Ubiquitin carboxyl-terminal hydrolase 12 [UniProtKB/Swiss-Prot:Q9FPT1]	NA	NA
TraesCS4A02G175600	0.813736	1.02443e-06	Metallothionein-like protein 1 [UniProtKB/Swiss-Prot:P43400]	Os11g0704500	NA
TraesCS2B02G091500	0.813633	0.000136111	Cytochrome P450 99A2 [UniProtKB/Swiss-Prot:Q7X7X4]	Os04g0180400	NA
TraesCS1D02G155900	0.813151	5.31637e-36	NA	NA	NA
TraesCS1A02G314300	0.812429	2.16559e-13	Ethylene-responsive transcription factor 4 [UniProtKB/Swiss-Prot:Q40477]	Os05g0497300	AT3G20310
TraesCS3D02G022100	0.812148	1.96833e-09	NA	Os01g0120500	AT1G18060
TraesCS5D02G228600	0.811898	1.46956e-15	Tetraspanin-8 [UniProtKB/Swiss-Prot:Q8S8Q6]	Os09g0425900	AT4G30430
TraesCS7A02G454600	0.811805	8.93294e-06	Early nodulin-like protein 2 [UniProtKB/Swiss-Prot:Q9T076]	Os06g0681200	NA
TraesCS6B02G423200	0.811726	2.73919e-08	F-box protein PP2-B1 [UniProtKB/Swiss-Prot:Q6NPT8]	Os02g0813350	NA
TraesCS2A02G254100	0.811215	5.15276e-05	Uncharacterized oxidoreductase At1g06690, chloroplastic [UniProtKB/Swiss-Prot:Q94A68]	Os07g0143000	AT1G06690
TraesCS3B02G250900	0.811149	2.32012e-20	Ubiquitin-like modifier-activating enzyme atg7 [UniProtKB/Swiss-Prot:Q94CD5]	Os01g0614900	NA
TraesCS1A02G230600	0.811066	2.55629e-07	Kinesin-like protein KIN-7L [UniProtKB/Swiss-Prot:Q2R2P7]	Os11g0552600	AT2G47500
TraesCS3B02G285700	0.810972	0.0042211	F-box/kelch-repeat protein At1g23390 [UniProtKB/Swiss-Prot:Q9LDE3]	Os01g0704300	NA
TraesCS6B02G113200	0.810958	8.22341e-12	Probable adenylate kinase 5, chloroplastic [UniProtKB/Swiss-Prot:Q0J6P7]	Os08g0288200	AT5G35170
TraesCS4D02G253300	0.810381	2.40813e-06	ABC transporter C family member 3 [UniProtKB/Swiss-Prot:Q9LK64]	Os01g0173900	AT1G71330
TraesCS7D02G536900	0.810272	2.62663e-15	2-oxoglutarate-Fe(II) type oxidoreductase hxnY [UniProtKB/Swiss-Prot:C8VK14]	NA	NA
TraesCS4A02G268500	0.810013	0.000181388	Zinc finger protein CONSTANS-LIKE 16 [UniProtKB/Swiss-Prot:Q8RWD0]	Os03g0711100	NA
TraesCS5D02G321800	0.809758	1.46248e-13	Ras-related protein RABA3 [UniProtKB/Swiss-Prot:Q9LNK1]	Os09g0527600	AT1G01200
TraesCS4A02G440100	0.809052	8.89328e-05	NA	NA	NA
TraesCS6B02G262700	0.808943	0.000631293	SufE-like protein 1, chloroplastic/mitochondrial [UniProtKB/Swiss-Prot:Q84W65]	Os03g0219500	AT4G26500
TraesCS6A02G000400	0.808897	1.44838e-11	Glycerate dehydrogenase HPR, peroxisomal [UniProtKB/Swiss-Prot:Q9C9W5]	Os02g0101500	AT1G68010
TraesCS1A02G262400	0.808837	2.88821e-08	Cold shock protein 1 [UniProtKB/Swiss-Prot:O65639]	Os05g0524666	NA
TraesCS1A02G125900	0.807957	0.00339631	Lachrymatory-factor synthase [UniProtKB/Swiss-Prot:P59082]	Os05g0202300	NA
TraesCS7A02G371600	0.807923	1.58996e-20	Chitinase 1 [UniProtKB/Swiss-Prot:Q9SLP4]	Os10g0416500	NA
TraesCS1A02G243300	0.807607	5.82176e-09	Cyclin-dependent kinase C-2 [UniProtKB/Swiss-Prot:Q5JK68]	Os05g0389700	AT5G12480
TraesCS6A02G223900	0.807424	1.79139e-05	Inositol phosphorylceramide glucuronosyltransferase 1 [UniProtKB/Swiss-Prot:Q8GWB7]	Os02g0624400	AT5G18480
TraesCS4A02G264500	0.806929	4.25441e-31	UV-B-induced protein At3g17800, chloroplastic [UniProtKB/Swiss-Prot:Q9LVJ0]	Os03g0717900	AT3G17800
TraesCS1A02G407100	0.806889	3.58951e-09	Prohibitin-2, mitochondrial [UniProtKB/Swiss-Prot:Q9ZNT7]	Os03g0841700	AT4G28510
TraesCS1D02G147800	0.80672	9.62315e-08	Very-long-chain aldehyde decarbonylase GL1-5 [UniProtKB/Swiss-Prot:B8BHF1]	Os10g0471100	AT1G02205
TraesCS2D02G173300	0.805257	2.01789e-05	NA	Os07g0619500	NA
TraesCS1D02G451900	0.804775	6.97606e-41	UDP-glucose 4-epimerase 1 [UniProtKB/Swiss-Prot:Q8LNZ3]	Os05g0595100	AT4G23920
TraesCS3B02G097800	0.804183	7.05743e-06	Probable inactive shikimate kinase like 1, chloroplastic [UniProtKB/Swiss-Prot:Q9LW20]	Os01g0102600	NA
TraesCS7A02G485300	0.803787	8.43355e-05	Peptidyl-prolyl cis-trans isomerase FKBP13, chloroplastic [UniProtKB/Swiss-Prot:Q9SCY2]	Os06g0663800	NA
TraesCS7A02G273000	0.803562	0.00191931	NEP1-interacting protein 2 [UniProtKB/Swiss-Prot:Q8GT74]	Os08g0550400	AT5G66070
TraesCS4B02G022800	0.803195	1.74108e-10	NA	Os03g0674900	NA
TraesCS5A02G262200	0.802659	7.95938e-07	NA	Os09g0483100	NA
TraesCS1A02G244300	0.802187	2.00594e-06	Probable membrane-associated kinase regulator 1 [UniProtKB/Swiss-Prot:Q3E936]	Os05g0390600	NA
TraesCS4B02G328200	0.80151	6.16387e-05	Serine/threonine-protein kinase BSK1-2 [UniProtKB/Swiss-Prot:Q336V9]	Os03g0132800	AT4G35230
TraesCS1A02G428700	0.801443	1.27586e-15	Structural maintenance of chromosomes protein 3 [UniProtKB/Swiss-Prot:Q56YN8]	Os02g0133300	AT2G27170
TraesCS4D02G137000	0.800641	0.000188698	Metallothionein-like protein 1 [UniProtKB/Swiss-Prot:P43400]	Os11g0704500	NA
TraesCS3B02G153900	0.799237	3.71721e-18	Mitochondrial dicarboxylate/tricarboxylate transporter DTC [UniProtKB/Swiss-Prot:Q9C5M0]	Os05g0208000	AT5G19760
TraesCS6D02G232300	0.798734	1.07992e-09	NA	Os02g0657700	NA
TraesCS1A02G429400	0.798548	1.20523e-15	NA	Os05g0589000	AT3G02420
TraesCS4A02G384500	0.798518	0.000411338	L-type lectin-domain containing receptor kinase SIT2 [UniProtKB/Swiss-Prot:Q7XUN6]	Os07g0575600	NA
TraesCS1A02G376100	0.798288	1.85977e-10	U4/U6 small nuclear ribonucleoprotein Prp31 homolog [UniProtKB/Swiss-Prot:Q8RXN6]	Os07g0141600	AT1G60170
TraesCS1B02G105700	0.798116	3.25801e-06	NA	Os04g0448000	NA
TraesCS1A02G166100	0.797743	7.06103e-08	Basic secretory protease (Fragments) [UniProtKB/Swiss-Prot:C0HJG8]	Os10g0490900	AT2G15220
TraesCS4B02G102500	0.797712	0.000983025	Monooxygenase 3 [UniProtKB/Swiss-Prot:Q9FLC2]	Os07g0491900	AT2G35660
TraesCS2B02G406600	0.797371	0.00194217	B-box zinc finger protein 21 [UniProtKB/Swiss-Prot:Q9LQZ7]	Os04g0540200	NA
TraesCS7A02G133300	0.796917	2.87277e-05	NA	Os07g0170200	AT2G23840
TraesCS6D02G283000	0.794783	1.28216e-08	NA	NA	NA
TraesCS2D02G146500	0.79468	0.00240526	Probable carboxylesterase 18 [UniProtKB/Swiss-Prot:Q9LT10]	Os07g0643400	NA
TraesCS5D02G355900	0.794231	0.00229084	Protein NLP1 [UniProtKB/Swiss-Prot:Q10S83]	Os09g0549450	NA
TraesCS3B02G203700	0.794123	1.27639e-28	Phospholipase A1 PLIP2, chloroplastic [UniProtKB/Swiss-Prot:F4HXL0]	Os01g0253900	AT3G62590
TraesCS6D02G218200	0.794084	0.000263075	NA	Os10g0335200	AT1G18680
TraesCS1A02G276300	0.793811	1.36439e-07	Ferredoxin-6, chloroplastic [UniProtKB/Swiss-Prot:P94044]	Os05g0443500	AT2G27510
TraesCS1A02G336000	0.793803	0.000260993	Eukaryotic translation initiation factor 2 subunit 3 [UniProtKB/Swiss-Prot:Q24208]	Os12g0607100	AT1G04170
TraesCS5D02G166900	0.793641	5.39745e-19	CBS domain-containing protein CBSX2, chloroplastic [UniProtKB/Swiss-Prot:Q9C5D0]	Os09g0115500	AT4G34120
TraesCS1A02G296300	0.79352	2.97973e-06	Protein MALE DISCOVERER 2 [UniProtKB/Swiss-Prot:C0LGQ4]	Os05g0471000	AT2G40270
TraesCS5B02G419300	0.79266	0.00168817	Probable ribose-5-phosphate isomerase 4, chloroplastic [UniProtKB/Swiss-Prot:Q9FI13]	Os03g0781400	NA
TraesCS7D02G421800	0.792659	1.32754e-37	NA	Os06g0694800	AT5G57345
TraesCS3A02G408700	0.791473	6.49753e-08	Stearoyl-[acyl-carrier-protein] 9-desaturase 1, chloroplastic [UniProtKB/Swiss-Prot:Q8LJJ9]	Os01g0880800	AT3G02630
TraesCS4B02G277600	0.791364	3.16903e-08	NA	Os03g0161500	AT4G14746
TraesCS7D02G438700	0.791356	2.25307e-06	Cytochrome P450 72A15 [UniProtKB/Swiss-Prot:Q9LUC5]	Os01g0627500	AT3G14680
TraesCS7D02G492100	0.791342	2.26507e-07	Probable calcium-binding protein CML8 [UniProtKB/Swiss-Prot:Q338P8]	Os10g0389000	AT3G50360
TraesCS7D02G379100	0.791289	0.00238251	Heavy metal-associated isoprenylated plant protein 26 [UniProtKB/Swiss-Prot:Q9SZN7]	Os04g0244800	AT5G66110
TraesCS1A02G251500	0.790032	1.93041e-05	NA	Os05g0562300	NA
TraesCS3B02G402200	0.789712	0.000936387	GABA transporter 1 [UniProtKB/Swiss-Prot:F4HW02]	Os01g0857400	AT1G08230
TraesCS3D02G140900	0.78955	4.29609e-05	Beta-glucuronosyltransferase GlcAT14B [UniProtKB/Swiss-Prot:Q9LFQ0]	Os01g0201100	AT4G27480
TraesCS3D02G390900	0.789499	4.70595e-25	NA	Os01g0898800	AT2G43340
TraesCS4A02G160000	0.789036	3.16848e-06	NA	NA	NA
TraesCS1A02G443000	0.788892	0.000300515	NA	NA	NA
TraesCS1A02G266500	0.788745	0.00222174	Protein trichome berefringence-like 7 [UniProtKB/Swiss-Prot:F4I037]	Os05g0426300	AT1G48880
TraesCS6D02G049600	0.788146	1.98732e-15	Heavy metal-associated isoprenylated plant protein 27 [UniProtKB/Swiss-Prot:Q67ZW1]	Os04g0244800	AT5G66110
TraesCS2B02G058000	0.787699	2.31777e-06	indolin-2-one monooxygenase [UniProtKB/Swiss-Prot:Q43255]	Os08g0106000	NA
TraesCS1A02G333000	0.787631	1.6546e-05	NA	Os05g0513350	NA
TraesCS5D02G237400	0.786747	6.72552e-10	NAD(P)H-quinone oxidoreductase subunit L, chloroplastic [UniProtKB/Swiss-Prot:Q9CAC5]	Os05g0348100	NA
TraesCS7B02G321500	0.786583	2.89613e-05	NA	Os06g0700300	NA
TraesCS5B02G121300	0.786501	0.0037252	Histone deacetylase 14 [UniProtKB/Swiss-Prot:Q941D6]	Os12g0182700	AT4G33470
TraesCS4D02G285100	0.786344	2.4842e-17	Cyclic dof factor 2 [UniProtKB/Swiss-Prot:Q93ZL5]	Os03g0169600	NA
TraesCS1A02G179400	0.78557	0.000817899	NA	Os10g0509401	AT3G49580
TraesCS3D02G413800	0.785435	7.83738e-08	NA	Os01g0912700	AT1G65230
TraesCS5D02G344500	0.785402	2.60627e-05	UDP-glycosyltransferase 71K2 [UniProtKB/Swiss-Prot:D3UAG2]	Os07g0503300	NA
TraesCS3A02G175800	0.784798	0.00191659	Beta-glucosidase 10 [UniProtKB/Swiss-Prot:Q93ZI4]	NA	AT4G27830
TraesCS5A02G365300	0.784442	0.00165663	Wall-associated receptor kinase 3 [UniProtKB/Swiss-Prot:Q9LMN8]	Os09g0561600	NA
TraesCS6A02G240700	0.78371	0.000352851	Cytochrome b5 isoform E [UniProtKB/Swiss-Prot:Q42342]	Os02g0649800	AT5G53560
TraesCS3A02G297400	0.783637	5.75192e-05	O-acyltransferase WSD1 [UniProtKB/Swiss-Prot:Q93ZR6]	Os01g0770000	NA
TraesCS1D02G215600	0.783257	0.000140309	Transcription factor UNE10 [UniProtKB/Swiss-Prot:Q8GZ38]	Os10g0556200	NA
TraesCS5D02G234900	0.783017	2.65687e-06	NA	Os09g0413700	AT1G74640
TraesCS2A02G263500	0.782272	4.75059e-06	Peroxidase 51 [UniProtKB/Swiss-Prot:Q9SZE7]	Os07g0115300	AT4G37530
TraesCS6A02G247700	0.781144	0.000194739	Vesicle-associated protein 1-3 [UniProtKB/Swiss-Prot:Q84WW5]	Os02g0661900	AT2G45140
TraesCS6A02G325700	0.780738	0.00026062	1-aminocyclopropane-1-carboxylate oxidase 3 [UniProtKB/Swiss-Prot:Q08507]	Os02g0771600	AT1G05010
TraesCS7D02G226300	0.780689	9.23318e-27	Carboxyl-terminal-processing peptidase 3, chloroplastic [UniProtKB/Swiss-Prot:F4J3G5]	Os06g0318600	AT3G57680
TraesCS3B02G449100	0.780268	0.004563	Probable proline transporter 2 [UniProtKB/Swiss-Prot:Q69LA1]	Os01g0908600	NA
TraesCS5A02G217000	0.779214	0.00612147	NA	Os09g0432900	AT5G57500
TraesCS3A02G118300	0.778927	2.18907e-06	Crocetin glucosyltransferase, chloroplastic [UniProtKB/Swiss-Prot:F8WKW0]	Os01g0179600	NA
TraesCS4D02G013300	0.778741	4.30545e-05	Cation/calcium exchanger 1 [UniProtKB/Swiss-Prot:Q9FKP1]	Os03g0656500	NA
TraesCS6D02G288000	0.778062	0.000301433	NA	Os02g0743200	AT3G48020
TraesCS4D02G325200	0.77794	0.00204949	Serine/threonine-protein kinase BSK1-2 [UniProtKB/Swiss-Prot:Q336V9]	Os03g0132800	AT4G35230
TraesCS7A02G174700	0.777357	2.48128e-15	12-oxophytodienoate reductase 1 [UniProtKB/Swiss-Prot:Q84QK0]	Os06g0216200	AT1G76690
TraesCS3A02G448900	0.777273	1.06442e-07	Heparan-alpha-glucosaminide N-acetyltransferase [UniProtKB/Swiss-Prot:Q3UDW8]	Os01g0931100	AT5G27730
TraesCS2A02G152400	0.776181	2.16183e-07	Cytochrome P450 709B2 [UniProtKB/Swiss-Prot:F4IK45]	Os07g0635500	NA
TraesCS2D02G093100	0.776177	2.17428e-42	Galactinol synthase 2 [UniProtKB/Swiss-Prot:Q9FXB2]	Os07g0687900	AT2G47180
TraesCS3A02G257500	0.775879	1.22953e-12	ABC transporter B family member 4 [UniProtKB/Swiss-Prot:O80725]	Os01g0695800	AT2G47000
TraesCS1A02G089500	0.775661	1.71255e-26	1-aminocyclopropane-1-carboxylate oxidase [UniProtKB/Swiss-Prot:Q9FR99]	Os05g0149400	AT1G77330
TraesCS3A02G135800	0.775541	1.94192e-15	Mitochondrial dicarboxylate/tricarboxylate transporter DTC [UniProtKB/Swiss-Prot:Q9C5M0]	Os05g0208000	AT5G19760
TraesCS1A02G443400	0.775344	1.40844e-09	DEAD-box ATP-dependent RNA helicase 56 [UniProtKB/Swiss-Prot:Q0JM17]	Os01g0549700	AT5G11170
TraesCS3D02G379700	0.775344	5.43464e-09	F-box protein At5g07610 [UniProtKB/Swiss-Prot:Q9FLS0]	Os01g0876300	NA
TraesCS5B02G523300	0.774464	5.15815e-19	Tol-Pal system protein TolB [UniProtKB/Swiss-Prot:Q1D0D0]	Os03g0840200	AT1G21680
TraesCS2D02G339600	0.77438	9.43058e-05	Peptide methionine sulfoxide reductase A2-1 [UniProtKB/Swiss-Prot:Q7XUP7]	Os04g0482000	AT4G25130
TraesCS5D02G116600	0.773599	3.02742e-09	Ureide permease 2 [UniProtKB/Swiss-Prot:Q9ZQ89]	Os12g0502800	AT2G03590
TraesCS1A02G268400	0.773449	2.20442e-05	Isoflavone reductase homolog IRL [UniProtKB/Swiss-Prot:P52580]	Os01g0106400	AT1G75290
TraesCS5D02G447500	0.772906	2.31384e-14	bZIP transcription factor RISBZ2 [UniProtKB/Swiss-Prot:Q7X9A8]	Os03g0796900	NA
TraesCS5A02G188600	0.772608	0.00154737	Subtilisin-like protease SBT1.7 [UniProtKB/Swiss-Prot:O65351]	NA	NA
TraesCS4B02G261900	0.771616	6.59967e-09	J domain-containing protein required for chloroplast accumulation response 1 [UniProtKB/Swiss-Prot:Q9C9Q4]	Os03g0198300	NA
TraesCS4D02G075500	0.77144	0.00370242	Glycosyltransferase family 92 protein RCOM_0530710 [UniProtKB/Swiss-Prot:B9S2H4]	NA	NA
TraesCS2B02G289000	0.770923	5.85251e-10	WRKY transcription factor WRKY51 [UniProtKB/Swiss-Prot:Q0JEE2]	Os04g0287400	NA
TraesCS2D02G065300	0.770254	9.19111e-21	Ribulose bisphosphate carboxylase small chain PWS4.3, chloroplastic [UniProtKB/Swiss-Prot:P00871]	Os12g0292400	AT1G67090
TraesCS6B02G309900	0.769791	2.97576e-06	NA	Os02g0717600	NA
TraesCS7A02G228300	0.769343	8.11352e-36	Carboxyl-terminal-processing peptidase 3, chloroplastic [UniProtKB/Swiss-Prot:F4J3G5]	Os06g0318600	AT3G57680
TraesCS3B02G428700	0.768668	3.35422e-05	NA	Os01g0898800	AT1G05870
TraesCS1A02G379800	0.768492	4.50981e-14	Syntaxin-71 [UniProtKB/Swiss-Prot:Q9SF29]	Os05g0553700	AT3G09740
TraesCS7A02G313000	0.767611	0.00613897	Lysine histidine transporter 1 [UniProtKB/Swiss-Prot:Q9FKS8]	Os08g0127100	AT1G67640
TraesCS4D02G309300	0.767051	0.000199062	Tropinone reductase homolog At2g29290 [UniProtKB/Swiss-Prot:Q9ZW13]	Os11g0652900	AT2G29170
TraesCS7D02G343300	0.766932	5.62237e-22	CBBY-like protein [UniProtKB/Swiss-Prot:Q94K71]	Os03g0565200	AT3G48420
TraesCS4A02G189000	0.766715	0.000438103	Uncharacterized protein At2g37660, chloroplastic [UniProtKB/Swiss-Prot:O80934]	NA	AT4G31530
TraesCS4B02G050500	0.766686	4.26481e-33	UV-B-induced protein At3g17800, chloroplastic [UniProtKB/Swiss-Prot:Q9LVJ0]	Os03g0717900	AT3G17800
TraesCS7A02G463300	0.76624	0.00222431	NA	NA	NA
TraesCS1A02G308100	0.76621	8.88678e-12	Transcription factor GAMYB [UniProtKB/Swiss-Prot:A2WW87]	Os01g0812000	AT2G26960
TraesCS1A02G366800	0.766023	0.00551691	PH, RCC1 and FYVE domains-containing protein 1 [UniProtKB/Swiss-Prot:Q947D2]	Os05g0545200	NA
TraesCS5A02G238000	0.765826	4.11113e-10	Abscisic acid 8'-hydroxylase 3 [UniProtKB/Swiss-Prot:Q0J185]	Os09g0457100	AT3G19270
TraesCS3A02G083700	0.765455	0.000406672	Chaperone protein dnaJ 20, chloroplastic [UniProtKB/Swiss-Prot:Q9SDN0]	Os01g0101700	NA
TraesCS3B02G453500	0.764584	4.2082e-08	NA	Os01g0912700	AT1G65230
TraesCS1A02G270300	0.764333	2.08103e-13	Bifunctional aspartate aminotransferase and glutamate/aspartate-prephenate aminotransferase [UniProtKB/Swiss-Prot:E9L7A5]	Os01g0871300	AT1G71920
TraesCS3A02G283700	0.763663	9.13714e-07	NA	Os01g0727700	NA
TraesCS1B02G443700	0.763396	0.000915814	Fatty acid amide hydrolase [UniProtKB/Swiss-Prot:Q7XJJ7]	Os12g0169000	NA
TraesCS5B02G389400	0.763191	9.21746e-08	NA	Os03g0746700	AT3G22550
TraesCS1A02G248400	0.763029	6.44521e-10	Mitochondrial proton/calcium exchanger protein [UniProtKB/Swiss-Prot:Q5ZK33]	Os02g0608400	AT1G65540
TraesCS5B02G271700	0.762881	6.33801e-08	Protein Iojap, chloroplastic [UniProtKB/Swiss-Prot:Q41822]	Os09g0493600	NA
TraesCS7D02G277500	0.762768	4.71426e-35	Monodehydroascorbate reductase 4, cytosolic [UniProtKB/Swiss-Prot:Q6ZJ08]	Os08g0557600	AT5G03630
TraesCS1A02G400200	0.762759	1.76521e-11	Urease accessory protein G [UniProtKB/Swiss-Prot:E0ZS47]	Os05g0565200	AT2G34470
TraesCS5A02G177700	0.761951	0.000145734	Chlorophyll a-b binding protein 7, chloroplastic [UniProtKB/Swiss-Prot:Q9C9K1]	Os09g0296800	AT1G76570
TraesCS7A02G373900	0.761938	0.00147452	Putative cellulose synthase A catalytic subunit 11 [UDP-forming] [UniProtKB/Swiss-Prot:Q69XK5]	Os06g0601600	NA
TraesCS1A02G437500	0.761845	2.89395e-08	ATP-dependent Clp protease proteolytic subunit-related protein 1, chloroplastic [UniProtKB/Swiss-Prot:Q9XJ35]	Os05g0592100	NA
TraesCS4B02G114600	0.761654	1.79624e-09	BEL1-like homeodomain protein 1 [UniProtKB/Swiss-Prot:Q9SJ56]	Os11g0158600	AT2G35940
TraesCS1A02G236600	0.761263	3.55458e-09	Receptor-like cytoplasmic kinase 185 [UniProtKB/Swiss-Prot:Q6I5Q6]	Os05g0372100	AT5G02800
TraesCS1B02G165000	0.761209	0.0053589	NA	NA	NA
TraesCS5D02G302600	0.761071	1.49971e-19	Beta-glucosidase 31 [UniProtKB/Swiss-Prot:B7F7K7]	Os09g0511600	NA
TraesCS2B02G302400	0.760648	3.0899e-20	ACT domain-containing protein ACR4 [UniProtKB/Swiss-Prot:Q8LJW3]	Os04g0391500	AT3G01990
TraesCS5D02G090400	0.759735	1.25903e-16	Protein NEN1 [UniProtKB/Swiss-Prot:Q9FLR0]	Os10g0407500	AT5G07710
TraesCS6B02G373200	0.758539	0.000116773	NA	Os02g0781900	NA
TraesCS1A02G149800	0.758398	2.03896e-10	Acyltransferase-like protein At1g54570, chloroplastic [UniProtKB/Swiss-Prot:Q9ZVN2]	Os01g0362100	AT1G54570
TraesCS4D02G186800	0.758397	2.29325e-05	Acetate/butyrate--CoA ligase AAE7, peroxisomal [UniProtKB/Swiss-Prot:Q8VZF1]	Os03g0305000	AT3G16910
TraesCS1A02G298700	0.758336	6.26144e-06	NA	Os05g0474900	AT5G05350
TraesCS6D02G336000	0.75822	7.16089e-14	Protein TIC 55, chloroplastic [UniProtKB/Swiss-Prot:Q9SK50]	Os02g0792800	AT2G24820
TraesCS5A02G392100	0.757864	5.99634e-05	NA	NA	NA
TraesCS5B02G002600	0.757852	2.1261e-24	Carotenoid 9,10(9',10')-cleavage dioxygenase [UniProtKB/Swiss-Prot:Q84KG5]	Os12g0640600	AT3G63520
TraesCS2D02G479100	0.757121	0.000572445	Helicase-like transcription factor CHR28 [UniProtKB/Swiss-Prot:Q94BR5]	Os04g0629300	NA
TraesCS4A02G028400	0.756708	6.43017e-11	NA	Os03g0161500	AT4G14746
TraesCS5D02G187100	0.756679	0.000113672	Sugar transport protein 14 [UniProtKB/Swiss-Prot:Q8GW61]	Os09g0322000	AT1G77210
TraesCS4B02G243500	0.75564	4.264e-08	Sugar transport protein MST4 [UniProtKB/Swiss-Prot:Q10PW9]	Os03g0218400	AT5G26340
TraesCS4A02G351900	0.755505	5.35428e-06	Receptor-like cytosolic serine/threonine-protein kinase RBK1 [UniProtKB/Swiss-Prot:Q8H1D6]	Os03g0839700	NA
TraesCS3B02G279700	0.755409	3.29296e-22	Glycine dehydrogenase (decarboxylating) 2, mitochondrial [UniProtKB/Swiss-Prot:O80988]	Os01g0711400	AT4G33010
TraesCS1A02G380900	0.754615	5.35139e-09	Protein DETOXIFICATION 14 [UniProtKB/Swiss-Prot:Q9C994]	Os05g0554000	NA
TraesCS1D02G239000	0.754329	2.38423e-10	Probable calcium-binding protein CML15 [UniProtKB/Swiss-Prot:Q6L4D4]	Os05g0380900	NA
TraesCS5D02G506800	0.753235	0.00531548	NA	NA	NA
TraesCS6B02G234900	0.753143	2.61313e-06	Senescence-associated protein OSA15, chloroplastic [UniProtKB/Swiss-Prot:Q65XF2]	Os05g0148700	NA
TraesCSU02G057000	0.753075	4.51158e-10	Non-specific lipid-transfer protein 4.3 [UniProtKB/Swiss-Prot:Q42842]	Os11g0427800	AT5G59310
TraesCS5A02G376900	0.752515	0.00111714	Organic cation/carnitine transporter 7 [UniProtKB/Swiss-Prot:Q940M4]	Os03g0638200	AT3G13050
TraesCS5D02G329100	0.75235	1.61604e-11	Probable serine/threonine-protein kinase PBL19 [UniProtKB/Swiss-Prot:Q9LTC0]	Os09g0533600	NA
TraesCS6B02G240900	0.752241	3.23563e-06	Uncharacterized membrane protein At3g27390 [UniProtKB/Swiss-Prot:Q8GUM4]	Os02g0597800	AT5G40640
TraesCS4B02G243100	0.751313	5.07574e-08	Tubulin alpha-2 chain [UniProtKB/Swiss-Prot:O22348]	Os03g0219300	AT5G19780
TraesCS3D02G251900	0.750399	4.23454e-14	Probable cytokinin riboside 5'-monophosphate phosphoribohydrolase LOGL1 [UniProtKB/Swiss-Prot:Q8LR50]	Os01g0708500	AT5G11950
TraesCS1A02G370800	0.75036	8.73414e-07	Probable galacturonosyltransferase 4 [UniProtKB/Swiss-Prot:Q93ZX7]	Os08g0327100	AT5G47780
TraesCS2A02G130200	0.749057	6.4769e-06	Haloacid dehalogenase-like hydrolase domain-containing protein 3 [UniProtKB/Swiss-Prot:Q5HZL9]	Os07g0659400	AT2G41250
TraesCS2B02G109700	0.748921	4.33183e-36	Galactinol synthase 2 [UniProtKB/Swiss-Prot:C7G304]	Os07g0687900	AT2G47180
TraesCS4B02G325800	0.748868	6.22907e-27	Catalase-1 [UniProtKB/Swiss-Prot:Q43206]	Os03g0131200	AT1G20630
TraesCS1A02G242600	0.748755	1.4514e-06	Protein RETICULATA-RELATED 4, chloroplastic [UniProtKB/Swiss-Prot:Q94CJ5]	Os05g0388600	AT5G12470
TraesCS7D02G132900	0.747968	6.55952e-05	NA	Os07g0170200	AT2G23840
TraesCS6B02G216900	0.747647	6.48515e-18	Probable protein phosphatase 2C 12 [UniProtKB/Swiss-Prot:Q6Z8B9]	Os02g0224100	NA
TraesCS7D02G384800	0.747613	0.0053728	Uncharacterized membrane protein At1g16860 [UniProtKB/Swiss-Prot:Q9FZ45]	NA	NA
TraesCS7A02G335600	0.747584	1.52491e-19	CBBY-like protein [UniProtKB/Swiss-Prot:Q94K71]	Os03g0565200	AT3G48420
TraesCS7D02G233100	0.747267	9.03256e-09	Achilleol B synthase [UniProtKB/Swiss-Prot:Q2R712]	Os06g0483200	AT2G07050
TraesCS7D02G143600	0.747044	3.33959e-09	Protein NUCLEAR FUSION DEFECTIVE 4 [UniProtKB/Swiss-Prot:F4I9E1]	Os06g0179200	AT1G80530
TraesCS4B02G142200	0.746755	3.41315e-16	Metallothionein-like protein 1 [UniProtKB/Swiss-Prot:P43400]	Os11g0704500	AT3G09390
TraesCS1A02G445500	0.745914	4.40849e-07	Protein argonaute 4B [UniProtKB/Swiss-Prot:Q0JF58]	Os04g0151800	AT2G27040
TraesCS1A02G038400	0.745724	0.00608193	Poly [ADP-ribose] polymerase 1 [UniProtKB/Swiss-Prot:Q7EYV7]	Os07g0413700	AT2G31320
TraesCS2B02G366900	0.74552	1.07076e-17	Phosphoglycolate phosphatase 1B, chloroplastic [UniProtKB/Swiss-Prot:P0DKC4]	Os04g0490800	AT5G36700
TraesCS4A02G140600	0.745307	3.99375e-08	Zinc finger protein CONSTANS-LIKE 13 [UniProtKB/Swiss-Prot:O82256]	Os03g0351100	AT2G47890
TraesCS5D02G210700	0.744996	0.00393232	Probable cinnamyl alcohol dehydrogenase 8C [UniProtKB/Swiss-Prot:Q6ERW7]	Os09g0400300	AT4G37980
TraesCS7A02G293600	0.743224	3.61621e-17	Bifunctional nuclease 2 [UniProtKB/Swiss-Prot:Q6YZM6]	Os08g0357000	AT1G19660
TraesCS2A02G273100	0.74322	1.42801e-19	Cysteine proteinase 1 [UniProtKB/Swiss-Prot:Q10716]	Os02g0469600	AT4G39090
TraesCS6D02G119700	0.742515	1.48027e-09	indolin-2-one monooxygenase [UniProtKB/Swiss-Prot:Q43255]	Os08g0106000	NA
TraesCS1A02G395300	0.741786	3.04536e-06	DnaJ homolog subfamily B member 4 [UniProtKB/Swiss-Prot:Q9D832]	Os05g0562300	AT2G20560
TraesCS6B02G204600	0.74092	1.74678e-17	PTI1-like tyrosine-protein kinase At3g15890 [UniProtKB/Swiss-Prot:Q9LSC2]	Os02g0186500	AT3G15890
TraesCS1A02G331900	0.739921	8.86634e-05	NA	Os05g0510700	NA
TraesCS2A02G094700	0.739291	2.95985e-14	Galactinol synthase 2 [UniProtKB/Swiss-Prot:Q9FXB2]	Os07g0687900	AT2G47180
TraesCS5B02G444100	0.739276	7.51018e-12	bZIP transcription factor RISBZ2 [UniProtKB/Swiss-Prot:Q7X9A8]	Os03g0796900	NA
TraesCS2A02G216700	0.73924	0.00012286	Cysteine-rich receptor-like protein kinase 6 [UniProtKB/Swiss-Prot:Q0D5R3]	Os07g0537000	AT4G21410
TraesCS3A02G313400	0.739003	1.17724e-05	Beta-glucuronosyltransferase GlcAT14A [UniProtKB/Swiss-Prot:Q9FLD7]	Os01g0201100	AT4G27480
TraesCS2A02G132100	0.738841	5.15321e-05	NA	Os07g0658100	NA
TraesCS4B02G275000	0.738443	4.39614e-08	Probable serine/threonine-protein kinase PBL16 [UniProtKB/Swiss-Prot:Q9FM85]	Os03g0159100	AT5G56460
TraesCS6B02G020800	0.736829	5.08917e-07	Putative nitric oxide synthase [UniProtKB/Swiss-Prot:Q6YPG5]	Os02g0104700	AT3G47450
TraesCS1A02G333700	0.735818	6.6398e-12	Proline iminopeptidase [UniProtKB/Swiss-Prot:P93732]	Os05g0513900	AT2G14260
TraesCS6B02G283200	0.735673	1.74439e-16	Protein ORANGE, chloroplastic [UniProtKB/Swiss-Prot:Q9FKF4]	Os02g0651300	AT5G61670
TraesCS3B02G418800	0.735571	6.53939e-07	F-box protein At5g07610 [UniProtKB/Swiss-Prot:Q9FLS0]	Os01g0876300	NA
TraesCS6B02G158300	0.735296	1.96539e-16	indolin-2-one monooxygenase [UniProtKB/Swiss-Prot:Q43255]	Os08g0106000	NA
TraesCS6B02G423100	0.735194	9.85937e-23	Glutathione reductase, cytosolic [UniProtKB/Swiss-Prot:P48642]	Os02g0813500	AT3G24170
TraesCS1A02G255300	0.734792	1.95641e-05	Squamosa promoter-binding-like protein 9 [UniProtKB/Swiss-Prot:Q6I576]	Os05g0408200	AT5G18830
TraesCS6B02G443700	0.733389	1.31338e-10	ATG8-interacting protein 1 [UniProtKB/Swiss-Prot:O82775]	Os02g0821900	NA
TraesCS2D02G342900	0.733389	0.000111089	NA	Os04g0485700	AT1G67660
TraesCS3D02G240000	0.733169	9.71218e-05	NA	Os01g0660900	AT5G62840
TraesCS1A02G306200	0.732792	2.56334e-21	ADP-ribosylation factor 2 [UniProtKB/Swiss-Prot:P51823]	Os05g0489600	AT3G62290
TraesCS1A02G270400	0.731938	3.49852e-14	Uncharacterized protein At5g49945 [UniProtKB/Swiss-Prot:Q94CC0]	Os05g0432400	AT5G49945
TraesCS2B02G312600	0.731895	4.98585e-22	Photosystem I subunit O [UniProtKB/Swiss-Prot:Q949Q5]	Os04g0414700	AT1G08380
TraesCS2B02G109800	0.7318	6.6418e-30	Galactinol synthase 2 [UniProtKB/Swiss-Prot:Q9FXB2]	Os07g0687900	AT2G47180
TraesCS7A02G364800	0.730758	1.4662e-06	NA	NA	NA
TraesCS3B02G392800	0.730622	0.000329905	Photosystem II reaction center PSB28 protein, chloroplastic [UniProtKB/Swiss-Prot:Q0JG75]	Os01g0938100	AT4G28660
TraesCS1D02G087600	0.729771	0.00128165	Serine carboxypeptidase 2 [UniProtKB/Swiss-Prot:P08819]	Os05g0158500	AT3G07990
TraesCS2B02G287600	0.729243	0.00161133	Probable pyridoxal 5'-phosphate synthase subunit PDX1.1 [UniProtKB/Swiss-Prot:Q69LA6]	Os07g0100200	AT5G01410
TraesCS4A02G318100	0.728934	3.86464e-09	Probable cytokinin riboside 5'-monophosphate phosphoribohydrolase LOGL5 [UniProtKB/Swiss-Prot:Q84M85]	Os03g0857900	AT5G06300
TraesCS1A02G089600	0.728812	1.46544e-26	1-aminocyclopropane-1-carboxylate oxidase [UniProtKB/Swiss-Prot:Q9FR99]	Os05g0149400	AT1G77330
TraesCS4B02G182900	0.728504	0.00225063	Calcium-binding protein CP1 [UniProtKB/Swiss-Prot:Q9FDX6]	Os03g0310800	NA
TraesCSU02G057100	0.728326	6.69129e-08	Non-specific lipid-transfer protein 4.3 [UniProtKB/Swiss-Prot:Q42842]	Os11g0427800	AT5G59310
TraesCS5B02G233500	0.726842	0.00130276	Putative ripening-related protein 2 [UniProtKB/Swiss-Prot:Q6H5X0]	Os02g0637000	NA
TraesCS1B02G373800	0.726383	6.3736e-05	Type IV inositol polyphosphate 5-phosphatase 3 [UniProtKB/Swiss-Prot:Q8H0Z6]	Os05g0535600	AT1G71710
TraesCS3B02G248500	0.725675	4.53548e-13	ABC transporter G family member 37 [UniProtKB/Swiss-Prot:Q8GU89]	Os01g0609900	AT1G15520
TraesCS3A02G510900	0.725563	0.00279423	Cationic peroxidase SPC4 [UniProtKB/Swiss-Prot:P84516]	Os01g0963000	AT1G71695
TraesCS4A02G455800	0.725224	4.87181e-07	Extra-large guanine nucleotide-binding protein 3 [UniProtKB/Swiss-Prot:Q9C516]	Os06g0111400	AT1G31930
TraesCS2A02G511000	0.724932	4.34525e-11	NA	Os08g0416800	NA
TraesCS5A02G036200	0.724922	1.36753e-29	Chloroplast stem-loop binding protein of 41 kDa b, chloroplastic [UniProtKB/Swiss-Prot:Q9SA52]	Os12g0420200	AT1G09340
TraesCS1D02G184500	0.724829	0.000985781	Methionine gamma-lyase [UniProtKB/Swiss-Prot:Q9SGU9]	Os10g0517500	AT1G64660
TraesCS7A02G060700	0.724599	0.00433161	Probable E3 ubiquitin-protein ligase XBOS36 [UniProtKB/Swiss-Prot:Q4JHE0]	Os06g0128700	NA
TraesCS4B02G091100	0.724175	8.9652e-09	Probable sucrose-phosphate synthase 5 [UniProtKB/Swiss-Prot:Q53JI9]	Os11g0236100	AT4G10120
TraesCS7B02G026100	0.723966	9.82021e-09	UPF0301 protein Plut_0637 [UniProtKB/Swiss-Prot:Q3B561]	Os10g0330400	NA
TraesCS2A02G437200	0.723433	2.6255e-12	E3 ubiquitin-protein ligase MBR2 [UniProtKB/Swiss-Prot:O49500]	Os04g0603200	NA
TraesCS6B02G093300	0.72266	0.000253918	Uncharacterized protein At2g37660, chloroplastic [UniProtKB/Swiss-Prot:O80934]	NA	AT4G31530
TraesCS7D02G524400	0.722617	7.58899e-07	12-oxophytodienoate reductase 2 [UniProtKB/Swiss-Prot:Q8GYB8]	NA	AT1G76690
TraesCS5B02G475000	0.722412	3.86068e-15	UDP-glycosyltransferase 91D2 [UniProtKB/Swiss-Prot:B3VI56]	Os03g0824600	NA
TraesCS3B02G238500	0.72231	2.58534e-21	IQ domain-containing protein IQM1 [UniProtKB/Swiss-Prot:O82645]	Os01g0570800	AT5G57010
TraesCS4A02G041000	0.721596	0.000291257	J domain-containing protein required for chloroplast accumulation response 1 [UniProtKB/Swiss-Prot:Q9C9Q4]	Os03g0198300	NA
TraesCS1A02G420300	0.721452	3.13451e-14	NA	Os05g0581800	NA
TraesCS7D02G445300	0.720983	6.24913e-05	NA	NA	NA
TraesCS7D02G016800	0.720894	1.22059e-24	Ferredoxin--NADP reductase, leaf isozyme 1, chloroplastic [UniProtKB/Swiss-Prot:A2Y8E0]	Os06g0107700	AT5G66190
TraesCS3A02G081300	0.720377	1.02648e-06	Light-regulated protein, chloroplastic [UniProtKB/Swiss-Prot:Q03200]	Os01g0102900	NA
TraesCS3B02G566700	0.719992	2.89108e-06	E3 ubiquitin-protein ligase RGLG3 [UniProtKB/Swiss-Prot:Q8RX26]	Os01g0960500	AT5G63970
TraesCS6D02G021100	0.719749	1.1685e-06	7-deoxyloganetin glucosyltransferase [UniProtKB/Swiss-Prot:F8WKW1]	Os02g0755900	AT1G22360
TraesCS1A02G406200	0.719134	8.22439e-05	3-ketoacyl-CoA synthase 4 [UniProtKB/Swiss-Prot:Q9LN49]	Os05g0568000	AT1G19440
TraesCS7A02G303400	0.71896	2.08294e-08	Transmembrane protein 120B [UniProtKB/Swiss-Prot:A6QPF8]	Os08g0152800	AT4G10430
TraesCS7A02G510200	0.718912	0.000369943	Lysosomal Pro-X carboxypeptidase [UniProtKB/Swiss-Prot:Q5RBU7]	Os06g0647400	AT2G24280
TraesCS6B02G257400	0.718777	2.07159e-06	Inositol phosphorylceramide glucuronosyltransferase 1 [UniProtKB/Swiss-Prot:Q8GWB7]	Os02g0624400	AT5G18480
TraesCS4B02G225500	0.718695	9.6835e-06	3-ketoacyl-CoA synthase 1 [UniProtKB/Swiss-Prot:Q9MAM3]	Os03g0245700	AT1G01120
TraesCS6D02G220500	0.718672	9.57876e-07	Thylakoid lumenal protein TL20.3, chloroplastic [UniProtKB/Swiss-Prot:Q8H1Q1]	Os02g0643500	AT1G12250
TraesCS1A02G313200	0.718296	0.00394695	NA	NA	NA
TraesCS6D02G008300	0.71828	2.61965e-08	Rhodanese-like domain-containing protein 17 [UniProtKB/Swiss-Prot:F4IPI4]	Os02g0102300	NA
TraesCS1A02G233200	0.718205	9.69525e-05	Signal peptidase complex catalytic subunit SEC11C [UniProtKB/Swiss-Prot:Q9WTR7]	Os06g0273800	AT1G52600
TraesCS7A02G369900	0.717679	0.00325594	NA	NA	NA
TraesCS1A02G115900	0.717389	0.000256139	Metallothionein-like protein 1 [UniProtKB/Swiss-Prot:P43400]	NA	NA
TraesCS7B02G364600	0.717301	6.8317e-08	NAC domain-containing protein 21/22 [UniProtKB/Swiss-Prot:Q84TE6]	Os06g0675600	NA
TraesCS6B02G301300	0.717002	2.9963e-09	Monodehydroascorbate reductase 2, peroxisomal [UniProtKB/Swiss-Prot:Q8S3R2]	Os02g0707100	AT3G27820
TraesCS1A02G445600	0.716879	2.45589e-06	Zinc finger CCCH domain-containing protein 37 [UniProtKB/Swiss-Prot:Q941Q3]	NA	AT1G48195
TraesCS4D02G028800	0.716861	0.00619368	1,4-dihydroxy-2-naphthoyl-CoA thioesterase 1 [UniProtKB/Swiss-Prot:Q9SX65]	Os03g0691400	AT1G48320
TraesCS7D02G152400	0.716841	4.93316e-09	Phospholipid hydroperoxide glutathione peroxidase 1, chloroplastic [UniProtKB/Swiss-Prot:P52032]	Os06g0185900	AT4G31870
TraesCS6A02G192800	0.716654	1.67405e-09	Putative elongation factor TypA-like SVR3, chloroplastic [UniProtKB/Swiss-Prot:F4K410]	Os02g0285800	AT5G13650
TraesCS7B02G474500	0.716411	0.0001361	Transport and Golgi organization 2 homolog [UniProtKB/Swiss-Prot:P54797]	Os09g0323500	NA
TraesCS1B02G085200	0.715441	2.11934e-21	Protein SEEDLING PLASTID DEVELOPMENT 1 [UniProtKB/Swiss-Prot:F4J3R7]	Os07g0187400	AT3G10420
TraesCS1A02G400300	0.71539	1.86799e-10	Phosphoinositide phosphatase SAC7 [UniProtKB/Swiss-Prot:Q9C5G5]	Os02g0554300	AT3G51460
TraesCS2A02G523600	0.714984	9.93813e-08	NA	Os04g0639300	AT2G21960
TraesCS6B02G059200	0.714746	0.00592825	NA	NA	NA
TraesCS4D02G012600	0.714682	0.00148372	Protein VAPYRIN [UniProtKB/Swiss-Prot:D3J162]	Os03g0655500	NA
TraesCS2A02G551000	0.71454	9.21281e-08	Wheatwin-1 [UniProtKB/Swiss-Prot:O64392]	Os11g0592000	AT3G04720
TraesCS1A02G290500	0.714309	0.000418182	TBC1 domain family member 8B [UniProtKB/Swiss-Prot:A3KGB4]	Os05g0465100	AT3G55020
TraesCS3A02G282100	0.714013	7.6127e-14	Chaperone protein dnaJ C76, chloroplastic [UniProtKB/Swiss-Prot:Q9FMX6]	Os01g0730500	AT2G42750
TraesCS4B02G304300	0.713512	6.96649e-07	Protein DETOXIFICATION 27 [UniProtKB/Swiss-Prot:Q9FKQ1]	Os03g0188100	AT5G65380
TraesCS1B02G456900	0.711929	1.00388e-05	Berberine bridge enzyme-like Cyn d 4 [UniProtKB/Swiss-Prot:Q5QJ60]	NA	NA
TraesCS4A02G304400	0.71178	1.88146e-07	Probable fatty acyl-CoA reductase 5 [UniProtKB/Swiss-Prot:Q0WRB0]	Os09g0567500	NA
TraesCS3B02G484000	0.711553	0.000655329	Beta-glucosidase 5 [UniProtKB/Swiss-Prot:Q5JK35]	Os01g0930800	AT1G02850
TraesCS1A02G166200	0.710952	0.0012608	Basic secretory protease (Fragments) [UniProtKB/Swiss-Prot:C0HJG8]	Os10g0491000	NA
TraesCS4B02G107500	0.710743	1.09901e-10	Protein ACTIVITY OF BC1 COMPLEX KINASE 1, chloroplastic [UniProtKB/Swiss-Prot:Q8RWG1]	Os11g0216300	AT4G31390
TraesCS5A02G135700	0.709308	5.03858e-13	Cytochrome c-type biogenesis ccda-like chloroplastic protein 2 [UniProtKB/Swiss-Prot:Q2QY07]	Os11g0140800	AT5G54290
TraesCS4D02G003200	0.708971	0.00488806	Short-chain dehydrogenase TIC 32, chloroplastic [UniProtKB/Swiss-Prot:Q6RVV4]	Os09g0570300	AT4G11410
TraesCS1D02G108200	0.708598	0.00325856	DNA-directed RNA polymerase V subunit 7 [UniProtKB/Swiss-Prot:A6QRA1]	Os05g0157100	AT4G14660
TraesCS4A02G017400	0.708305	9.55448e-06	Patatin-like protein 2 [UniProtKB/Swiss-Prot:O48723]	Os08g0476900	AT2G26560
TraesCS5B02G202700	0.707684	1.64762e-05	Probable cinnamyl alcohol dehydrogenase 8D [UniProtKB/Swiss-Prot:Q6ERW5]	Os09g0400400	AT4G37980
TraesCS4A02G156900	0.706825	2.75976e-07	Chromophore lyase CRL, chloroplastic [UniProtKB/Swiss-Prot:Q9FI46]	Os11g0524300	AT5G51020
TraesCS7B02G123100	0.706773	0.00224078	UDP-glucose:2-hydroxyflavanone C-glucosyltransferase [UniProtKB/Swiss-Prot:C3W7B0]	Os06g0289200	NA
TraesCS2B02G237900	0.706745	3.38568e-05	Probable proteasome inhibitor [UniProtKB/Swiss-Prot:Q9M330]	Os07g0548900	NA
TraesCS6B02G367000	0.706667	1.07369e-12	Protein OPAQUE1 [UniProtKB/Swiss-Prot:K7U9N8]	Os02g0777700	AT4G33200
TraesCS1A02G251700	0.706425	8.1747e-11	Probable manganese-transporting ATPase PDR2 [UniProtKB/Swiss-Prot:Q9LT02]	Os05g0402800	AT5G23630
TraesCS5D02G019600	0.705423	9.14915e-07	Neutral ceramidase [UniProtKB/Swiss-Prot:Q0JL46]	Os01g0624000	AT2G38010
TraesCS4A02G101500	0.705252	2.60214e-08	Photosynthetic NDH subunit of lumenal location 1, chloroplastic [UniProtKB/Swiss-Prot:O80634]	Os03g0279950	AT2G39470
TraesCS1A02G422100	0.705156	0.000136767	Asparagine synthetase [glutamine-hydrolyzing] 2 [UniProtKB/Swiss-Prot:Q43011]	Os06g0265000	AT5G10240
TraesCS3D02G243200	0.704807	4.35641e-07	NA	Os01g0666600	AT2G42975
TraesCS2D02G348800	0.703888	1.69341e-12	Chitinase 4 [UniProtKB/Swiss-Prot:O04138]	Os04g0493400	AT2G43590
TraesCS6B02G274900	0.702683	0.000353199	NA	Os02g0657700	NA
TraesCS5B02G219400	0.702282	0.000193484	Very-long-chain aldehyde decarbonylase GL1-1 [UniProtKB/Swiss-Prot:Q69PA8]	Os09g0426800	AT5G57800
TraesCS5D02G491100	0.70158	0.00202846	Zinc finger protein ZAT8 [UniProtKB/Swiss-Prot:Q9LX85]	Os03g0820400	NA
TraesCS1A02G403900	0.701427	1.56583e-09	NA	Os05g0566900	NA
TraesCS3D02G485000	0.700334	0.000141421	CSC1-like protein At3g54510 [UniProtKB/Swiss-Prot:F4JCY2]	Os01g0950900	AT3G54510
TraesCS4D02G273600	0.700328	1.12438e-09	Probable serine/threonine-protein kinase PBL16 [UniProtKB/Swiss-Prot:Q9FM85]	Os03g0159100	AT5G56460
TraesCS3A02G218000	0.700218	9.7422e-10	ABC transporter G family member 37 [UniProtKB/Swiss-Prot:Q8GU89]	Os01g0609900	AT1G15520
TraesCS1B02G136800	0.700149	4.05207e-14	NA	Os05g0176700	AT1G52720
TraesCS1D02G428800	0.700078	1.01823e-08	Solanesyl-diphosphate synthase 2, chloroplastic [UniProtKB/Swiss-Prot:Q75HZ9]	Os05g0582300	AT1G17050
TraesCS3D02G015900	0.70005	2.64224e-05	Beta-fructofuranosidase, insoluble isoenzyme 3 [UniProtKB/Swiss-Prot:Q0JDC6]	Os04g0413200	AT3G52600
TraesCS6D02G051300	0.69959	0.00177636	NA	Os03g0410700	NA
TraesCS2D02G122900	0.699279	0.00036897	Tubby-like F-box protein 11 [UniProtKB/Swiss-Prot:Q8H485]	Os07g0667000	AT2G47900
TraesCS4B02G124800	0.698896	2.30875e-07	Nicotianamine aminotransferase 1 [UniProtKB/Swiss-Prot:A0A0P0VI36]	Os11g0644800	NA
TraesCS1A02G343700	0.698808	1.41381e-05	NA	Os05g0524100	NA
TraesCS7B02G250200	0.697787	6.98308e-26	Pheophytinase, chloroplastic [UniProtKB/Swiss-Prot:Q9FFZ1]	Os06g0354700	AT5G13800
TraesCS1A02G402900	0.697771	1.44361e-06	NA	Os05g0566600	NA
TraesCS1A02G363900	0.697389	0.00014278	30S ribosomal protein S16-2, chloroplastic/mitochondrial [UniProtKB/Swiss-Prot:Q9LTS6]	Os09g0498100	AT5G56940
TraesCS3B02G112300	0.696838	2.28681e-13	Cysteine-rich receptor-like protein kinase 2 [UniProtKB/Swiss-Prot:Q9CAL3]	Os01g0548600	NA
TraesCS1A02G277000	0.696448	0.00637205	Solute carrier family 35 member F2 [UniProtKB/Swiss-Prot:Q8IXU6]	Os05g0444300	NA
TraesCS3D02G465600	0.696255	0.000305558	Hydroxyethylthiazole kinase [UniProtKB/Swiss-Prot:K7VCB9]	NA	AT3G24030
TraesCS1A02G411500	0.696234	0.000220759	NA	Os05g0573000	NA
TraesCS3D02G524000	0.696096	2.699e-09	NA	NA	NA
TraesCS5B02G499800	0.695891	3.51947e-06	Pectin acetylesterase 3 [UniProtKB/Swiss-Prot:O80731]	Os01g0319000	AT3G09410
TraesCS6A02G046900	0.6958	1.02708e-05	Protein LOW PSII ACCUMULATION 3, chloroplastic [UniProtKB/Swiss-Prot:Q8H0W0]	Os02g0117100	AT1G73060
TraesCS2A02G033600	0.69503	3.40642e-08	Basic endochitinase A [UniProtKB/Swiss-Prot:Q9FRV1]	Os05g0399300	AT3G12500
TraesCS5A02G427600	0.694458	0.00505231	Indole-3-acetaldehyde oxidase [UniProtKB/Swiss-Prot:O23888]	Os03g0790700	AT3G43600
TraesCS4D02G141000	0.694286	3.80528e-09	Vacuolar protein sorting-associated protein 2 homolog 1 [UniProtKB/Swiss-Prot:Q9SKI2]	Os11g0703400	AT2G06530
TraesCS1B02G247300	0.694229	2.56193e-07	NA	Os05g0372800	NA
TraesCS2B02G150900	0.693789	0.000976737	Uncharacterized protein At5g39865 [UniProtKB/Swiss-Prot:Q9FLE8]	Os07g0659900	AT2G41330
TraesCS3D02G485100	0.693729	9.59926e-08	Pyridoxal phosphate homeostasis protein [UniProtKB/Swiss-Prot:Q9Z2Y8]	Os01g0950866	AT4G26860
TraesCS1A02G026200	0.692572	2.67686e-05	Disease resistance protein RPM1 [UniProtKB/Swiss-Prot:Q39214]	NA	AT3G46530
TraesCS4D02G270900	0.692471	3.39792e-16	Uclacyanin 1 [UniProtKB/Swiss-Prot:O82081]	NA	NA
TraesCS6D02G154600	0.692123	2.94421e-15	Lipoxygenase 2.3, chloroplastic [UniProtKB/Swiss-Prot:Q8GSM2]	Os02g0194700	AT3G45140
TraesCS1D02G327000	0.691981	6.10707e-24	Probable cysteine protease RD21B [UniProtKB/Swiss-Prot:Q9FMH8]	Os05g0508300	AT1G09850
TraesCS2D02G093000	0.691682	5.58564e-10	Galactinol synthase 2 [UniProtKB/Swiss-Prot:Q9FXB2]	Os07g0687900	AT2G47180
TraesCS2D02G164400	0.691584	2.89999e-13	NA	Os11g0491400	NA
TraesCS3D02G052100	0.691313	2.28606e-22	Non-specific lipid-transfer protein 4.3 [UniProtKB/Swiss-Prot:Q42842]	NA	NA
TraesCS2B02G397000	0.690966	6.15887e-07	NA	Os04g0520700	AT2G28400
TraesCS1A02G233700	0.690945	0.000364273	Acyl carrier protein 2, mitochondrial [UniProtKB/Swiss-Prot:O80800]	Os05g0377000	AT1G65290
TraesCS5B02G357100	0.689544	0.00358647	Mitochondrial phosphate carrier protein 1, mitochondrial [UniProtKB/Swiss-Prot:Q7DNC3]	Os09g0554000	AT2G17270
TraesCS2B02G112800	0.689517	1.48748e-16	Galactinol synthase 2 [UniProtKB/Swiss-Prot:Q9FXB2]	Os07g0687900	AT2G47180
TraesCS2D02G415700	0.689492	4.22847e-10	Probable LRR receptor-like serine/threonine-protein kinase At1g56130 [UniProtKB/Swiss-Prot:C0LGH2]	Os04g0616600	AT1G56130
TraesCS1A02G307700	0.688704	1.34162e-11	Endoplasmic reticulum-Golgi intermediate compartment protein 3 [UniProtKB/Swiss-Prot:Q803I2]	Os05g0490200	AT1G36050
TraesCS5D02G554300	0.687833	0.00153744	Putative gamma-glutamylcyclotransferase At3g02910 [UniProtKB/Swiss-Prot:Q9M8T3]	Os03g0854000	AT3G02910
TraesCS6D02G275100	0.68745	0.00395776	Probable potassium transporter 16 [UniProtKB/Swiss-Prot:Q84MS3]	Os02g0730300	NA
TraesCS3A02G220600	0.687289	1.04569e-20	Ubiquitin-like modifier-activating enzyme atg7 [UniProtKB/Swiss-Prot:Q94CD5]	Os01g0614900	NA
TraesCS1D02G434300	0.687135	3.20121e-05	Probable GABA transporter 2 [UniProtKB/Swiss-Prot:Q8L4X4]	Os05g0586500	AT5G41800
TraesCS6B02G141400	0.687026	7.93205e-13	L-arabinokinase [UniProtKB/Swiss-Prot:O23461]	Os02g0141300	AT4G16130
TraesCS1A02G342500	0.685978	2.84896e-06	Hexokinase-5 [UniProtKB/Swiss-Prot:Q5W676]	Os05g0522500	AT4G29130
TraesCS2A02G403200	0.685762	4.48597e-06	Protein indeterminate-domain 4, chloroplastic [UniProtKB/Swiss-Prot:Q8GYC1]	Os04g0566400	NA
TraesCS6B02G051800	0.685728	0.0022614	Glycerol-3-phosphate 2-O-acyltransferase 6 [UniProtKB/Swiss-Prot:O80437]	Os02g0114400	AT2G38110
TraesCS6D02G160400	0.685562	3.6935e-25	Amino acid transporter AVT6A [UniProtKB/Swiss-Prot:Q9LI61]	Os02g0191300	AT3G30390
TraesCS6B02G176600	0.684965	5.89097e-13	Glyoxylate/succinic semialdehyde reductase 1 [UniProtKB/Swiss-Prot:Q9LSV0]	Os02g0562700	AT3G25530
TraesCS7D02G343600	0.684902	9.88585e-14	Peptide methionine sulfoxide reductase B1, chloroplastic [UniProtKB/Swiss-Prot:Q0DC89]	Os06g0472000	AT1G53670
TraesCS1B02G389700	0.684597	0.0044021	Ethylene-responsive transcription factor ERF109 [UniProtKB/Swiss-Prot:Q9SZ06]	Os05g0361700	NA
TraesCS2A02G540200	0.68453	5.85433e-05	Uncharacterized protein At5g50100, chloroplastic [UniProtKB/Swiss-Prot:Q8W485]	Os04g0668800	NA
TraesCS2B02G394400	0.684135	3.76186e-06	Probable metal-nicotianamine transporter YSL12 [UniProtKB/Swiss-Prot:Q5JQD7]	Os04g0524600	AT1G65730
TraesCS7A02G323800	0.684024	1.92676e-06	Probable polygalacturonase [UniProtKB/Swiss-Prot:A7PZL3]	Os08g0107300	AT4G33440
TraesCS6B02G326000	0.682861	0.00657744	NA	Os02g0733900	NA
TraesCS1B02G283600	0.682446	0.0022865	Fructose-1,6-bisphosphatase, cytosolic [UniProtKB/Swiss-Prot:Q43139]	Os01g0866400	AT1G43670
TraesCS7A02G551200	0.682134	0.00179773	Transport and Golgi organization 2 homolog [UniProtKB/Swiss-Prot:P54797]	Os09g0323500	NA
TraesCS3D02G408000	0.681924	1.90487e-05	BTB/POZ and TAZ domain-containing protein 2 [UniProtKB/Swiss-Prot:Q94BN0]	Os01g0908200	NA
TraesCS6B02G322400	0.680698	7.14529e-16	Organelle RRM domain-containing protein 1, chloroplastic [UniProtKB/Swiss-Prot:Q6YWP9]	Os02g0730800	NA
TraesCS7A02G501400	0.680629	2.50264e-10	Very-long-chain aldehyde decarbonylase GL1-2 [UniProtKB/Swiss-Prot:Q6ETL8]	Os06g0653000	AT5G57800
TraesCS1A02G308800	0.68041	6.98018e-10	Calmodulin [UniProtKB/Swiss-Prot:P17928]	Os05g0491100	AT2G27030
TraesCS4A02G050000	0.680332	0.000310279	Probable protein phosphatase 2C 29 [UniProtKB/Swiss-Prot:Q8H063]	Os03g0207400	AT4G33920
TraesCS4A02G404500	0.680195	1.68815e-05	Protein DETOXIFICATION 27 [UniProtKB/Swiss-Prot:Q9FKQ1]	Os03g0188100	AT5G65380
TraesCS2A02G066900	0.679694	6.68263e-20	Ribulose bisphosphate carboxylase small chain PWS4.3, chloroplastic [UniProtKB/Swiss-Prot:P00871]	Os12g0291400	AT1G67090
TraesCS6B02G313100	0.679446	3.96957e-22	Uncharacterized WD repeat-containing protein C2A9.03 [UniProtKB/Swiss-Prot:Q9Y7K5]	Os02g0721600	AT5G56190
TraesCS7D02G300300	0.67935	0.00207533	F-box protein PP2-B10 [UniProtKB/Swiss-Prot:Q9ZVQ6]	Os08g0150700	NA
TraesCS3D02G160100	0.679342	5.3411e-07	Ras-related protein Rab7 [UniProtKB/Swiss-Prot:O24461]	Os01g0227300	AT3G16100
TraesCS6B02G385200	0.679267	4.02495e-05	Probable E3 ubiquitin-protein ligase XBOS32 [UniProtKB/Swiss-Prot:Q6KAE5]	Os02g0791200	AT5G57740
TraesCS5D02G074900	0.679222	9.82588e-08	Protein JINGUBANG [UniProtKB/Swiss-Prot:O48716]	Os12g0594000	AT3G18950
TraesCS7B02G036800	0.67866	0.000153193	Sulfiredoxin, chloroplastic/mitochondrial [UniProtKB/Swiss-Prot:Q8GY89]	Os06g0174300	AT1G31170
TraesCS2A02G094500	0.67855	7.1561e-28	Galactinol synthase 2 [UniProtKB/Swiss-Prot:Q9FXB2]	Os07g0687900	AT2G47180
TraesCS4B02G332800	0.678193	2.38328e-30	Late embryogenesis abundant protein, group 3 [UniProtKB/Swiss-Prot:Q03968]	NA	NA
TraesCS1A02G420800	0.677751	2.1616e-09	Protein REDUCED WALL ACETYLATION 3 [UniProtKB/Swiss-Prot:Q66GQ5]	Os05g0582100	AT2G34410
TraesCS5D02G204200	0.677737	0.00153914	NA	Os09g0376400	NA
TraesCS1A02G310500	0.677733	1.02832e-12	Cytochrome P450 98A1 [UniProtKB/Swiss-Prot:O48956]	Os05g0494000	AT2G40890
TraesCS2A02G255600	0.677288	3.97851e-24	NA	NA	NA
TraesCS1A02G442600	0.677258	1.46592e-12	Casein kinase 1-like protein 2 [UniProtKB/Swiss-Prot:Q9CAI5]	Os05g0593800	AT4G08800
TraesCS2B02G324500	0.67685	0.00256219	NA	Os04g0439100	NA
TraesCS6D02G307300	0.676824	2.25786e-06	NA	Os02g0506600	AT5G43260
TraesCS3B02G270200	0.676645	1.07285e-13	Mitogen-activated protein kinase 8 [UniProtKB/Swiss-Prot:Q5SN53]	Os01g0665200	AT2G42880
TraesCS6A02G220200	0.676273	5.9146e-10	Serine carboxypeptidase-like 34 [UniProtKB/Swiss-Prot:Q0WPR4]	Os02g0634700	AT5G23210
TraesCS1A02G264700	0.675405	0.000600755	Probable magnesium transporter NIPA4 [UniProtKB/Swiss-Prot:Q94AH3]	Os05g0424800	AT1G71900
TraesCS1A02G046400	0.675051	8.23936e-06	Protein trichome birefringence-like 11 [UniProtKB/Swiss-Prot:Q5BPJ0]	Os11g0148200	AT5G19160
TraesCS2B02G078900	0.673541	0.00193841	Ribulose bisphosphate carboxylase small chain PWS4.3, chloroplastic [UniProtKB/Swiss-Prot:P00871]	Os12g0274700	AT1G67090
TraesCS3A02G418300	0.67353	1.41029e-05	NA	Os01g0912700	AT1G65230
TraesCS7A02G121500	0.673269	3.71414e-05	TOM1-like protein 6 [UniProtKB/Swiss-Prot:O80910]	NA	NA
TraesCS1A02G329200	0.672529	1.97338e-08	Ubiquitin carboxyl-terminal hydrolase 25 [UniProtKB/Swiss-Prot:Q9FPS2]	Os05g0510300	NA
TraesCS4B02G015500	0.672363	8.42295e-20	Glucan endo-1,3-beta-glucosidase 8 [UniProtKB/Swiss-Prot:Q6NKW9]	Os03g0656800	AT2G19440
TraesCS2D02G165800	0.672207	0.0014147	Subtilisin-chymotrypsin inhibitor-2B (Fragment) [UniProtKB/Swiss-Prot:P08626]	Os01g0615050	NA
TraesCS1D02G141000	0.672151	1.51819e-05	E3 ubiquitin-protein ligase AIRP2 [UniProtKB/Swiss-Prot:Q9M022]	Os10g0445400	AT5G01520
TraesCS1A02G287000	0.67199	0.00591571	NA	Os05g0461600	NA
TraesCS1A02G361500	0.670048	0.00154036	SWR1-complex protein 4 [UniProtKB/Swiss-Prot:Q8VZL6]	Os05g0540800	AT2G47210
TraesCS5D02G001900	0.669804	2.86033e-28	Carotenoid 9,10(9',10')-cleavage dioxygenase [UniProtKB/Swiss-Prot:Q84KG5]	Os12g0640600	AT3G63520
TraesCS7A02G304800	0.669181	0.000186126	F-box protein PP2-B10 [UniProtKB/Swiss-Prot:Q9ZVQ6]	Os08g0150700	NA
TraesCS7D02G528600	0.66807	4.01475e-13	NA	Os06g0724400	NA
TraesCS6B02G230800	0.667601	1.25525e-14	NA	NA	NA
TraesCS7B02G327400	0.666939	4.27838e-14	Xyloglucan endotransglucosylase/hydrolase protein 22 [UniProtKB/Swiss-Prot:Q38857]	Os06g0696600	AT4G30270
TraesCS1A02G417400	0.666816	0.0012766	Zinc finger CCCH domain-containing protein 27 [UniProtKB/Swiss-Prot:Q0JDM0]	Os04g0394300	NA
TraesCS2A02G357400	0.666726	0.00110353	Protein NUCLEAR FUSION DEFECTIVE 4 [UniProtKB/Swiss-Prot:F4I9E1]	Os04g0502800	AT1G80530
TraesCS7D02G210700	0.666568	1.46909e-11	Autophagy-related protein 2 [UniProtKB/Swiss-Prot:F8S296]	Os06g0267600	NA
TraesCS7B02G191400	0.666442	3.87498e-22	Carboxyl-terminal-processing peptidase 3, chloroplastic [UniProtKB/Swiss-Prot:F4J3G5]	Os06g0318600	AT3G57680
TraesCS4A02G125300	0.666209	8.89984e-12	Galactinol synthase 1 [UniProtKB/Swiss-Prot:O22893]	Os03g0316200	AT1G56600
TraesCS3D02G084900	0.66617	3.29519e-09	Cytochrome P450 704C1 [UniProtKB/Swiss-Prot:Q50EK3]	Os04g0573900	AT2G45510
TraesCS1A02G396200	0.664857	3.67647e-11	Xyloglucan endotransglycosylase/hydrolase protein 8 [UniProtKB/Swiss-Prot:Q76BW5]	Os08g0237000	NA
TraesCS5D02G362300	0.664655	0.00424339	Protein PLASTID MOVEMENT IMPAIRED 1 [UniProtKB/Swiss-Prot:Q9C8E6]	Os09g0553900	NA
TraesCS6B02G300300	0.664578	4.61301e-11	NA	Os02g0705400	AT2G21620
TraesCS7A02G034300	0.663977	4.43554e-14	Probable glutathione S-transferase GSTU6 [UniProtKB/Swiss-Prot:Q06398]	NA	NA
TraesCS5B02G559000	0.663709	3.61696e-22	Ribosome-binding factor PSRP1, chloroplastic [UniProtKB/Swiss-Prot:P19954]	Os03g0856500	NA
TraesCS1B02G132600	0.663645	6.92228e-10	Thioredoxin H4-2 [UniProtKB/Swiss-Prot:Q0DKF1]	Os05g0169000	AT3G08710
TraesCS7B02G044200	0.663544	2.86295e-15	Acyl-coenzyme A oxidase 2, peroxisomal [UniProtKB/Swiss-Prot:O65201]	Os11g0605500	AT5G65110
TraesCS6A02G009200	0.663509	4.56592e-23	Ferredoxin--NADP reductase, leaf isozyme 2, chloroplastic [UniProtKB/Swiss-Prot:Q6ZFJ3]	Os02g0103800	AT5G66190
TraesCS2B02G101700	0.663469	2.13971e-17	Probable AMP deaminase [UniProtKB/Swiss-Prot:Q84NP7]	Os07g0693500	AT2G38280
TraesCS7A02G312800	0.663287	0.00612312	Lysine histidine transporter 1 [UniProtKB/Swiss-Prot:Q9FKS8]	Os08g0127100	AT1G67640
TraesCS3D02G159800	0.663232	5.77692e-27	Probable chlorophyll(ide) b reductase NYC1, chloroplastic [UniProtKB/Swiss-Prot:Q5N800]	Os01g0227100	AT4G13250
TraesCS4A02G068400	0.663183	6.09612e-07	3-ketoacyl-CoA synthase 1 [UniProtKB/Swiss-Prot:Q9MAM3]	Os03g0245700	AT1G01120
TraesCS5B02G519500	0.662992	0.000708682	NA	Os03g0838900	NA
TraesCS6A02G191000	0.662975	4.38113e-05	Protein phosphatase 2C and cyclic nucleotide-binding/kinase domain-containing protein [UniProtKB/Swiss-Prot:Q9SL76]	Os02g0281000	AT2G20050
TraesCS1D02G139400	0.662597	1.01529e-14	Heavy metal-associated isoprenylated plant protein 6 [UniProtKB/Swiss-Prot:Q9LZF1]	Os10g0440500	NA
TraesCS3D02G267000	0.66235	0.00118931	O-acyltransferase WSD1 [UniProtKB/Swiss-Prot:Q93ZR6]	Os01g0681000	NA
TraesCS7A02G391600	0.662269	5.80184e-11	Amino acid transporter AVT6A [UniProtKB/Swiss-Prot:Q9LI61]	Os06g0633800	AT3G30390
TraesCS4A02G277800	0.661858	2.42294e-05	NA	Os03g0695500	NA
TraesCS5B02G228900	0.661599	6.92068e-07	NAD(P)H-quinone oxidoreductase subunit L, chloroplastic [UniProtKB/Swiss-Prot:Q9CAC5]	Os05g0348100	NA
TraesCS1A02G363700	0.661194	2.11567e-07	60S ribosomal protein L28-1 [UniProtKB/Swiss-Prot:O82204]	Os05g0541900	AT2G19730
TraesCS1B02G066000	0.661006	0.00142121	ABC transporter G family member 16 [UniProtKB/Swiss-Prot:Q9M2V7]	Os05g0120200	AT2G39350
TraesCS3B02G183300	0.660772	8.28708e-27	Salt stress root protein RS1 [UniProtKB/Swiss-Prot:Q0JPA6]	Os01g0233000	NA
TraesCS5D02G209300	0.660666	0.000732352	Monoacylglycerol lipase [UniProtKB/Swiss-Prot:O07427]	Os09g0394700	AT1G18360
TraesCS5A02G340500	0.660534	1.25023e-06	UDP-glycosyltransferase 71K2 [UniProtKB/Swiss-Prot:D3UAG2]	Os07g0503300	NA
TraesCS4A02G065700	0.660442	2.53341e-07	Tubulin alpha-2 chain [UniProtKB/Swiss-Prot:O22348]	Os03g0219300	AT5G19780
TraesCS7A02G259000	0.660292	4.10159e-16	NA	Os08g0529300	NA
TraesCS5D02G117100	0.659444	3.66865e-07	NAD(P)H-quinone oxidoreductase subunit U, chloroplastic [UniProtKB/Swiss-Prot:Q84VQ4]	Os12g0498500	NA
TraesCS1A02G246900	0.659411	2.65179e-14	Coatomer subunit delta-1 [UniProtKB/Swiss-Prot:Q0DJA0]	Os05g0310800	AT5G05010
TraesCS4B02G064400	0.659376	0.000105405	NA	Os03g0734100	NA
TraesCS2A02G214200	0.659375	4.02923e-06	Isopentenyl-diphosphate Delta-isomerase II, chloroplastic [UniProtKB/Swiss-Prot:Q42553]	Os07g0546000	AT3G02780
TraesCS4A02G270500	0.659253	0.00256103	NA	Os03g0708400	AT1G73650
TraesCS4D02G182600	0.659229	1.57883e-15	Protein SUPPRESSOR OF QUENCHING 1, chloroplastic [UniProtKB/Swiss-Prot:Q8VZ10]	Os03g0311300	AT1G56500
TraesCS2D02G131300	0.658603	2.42445e-05	Uncharacterized protein At5g39865 [UniProtKB/Swiss-Prot:Q9FLE8]	Os07g0659900	AT2G41330
TraesCS7D02G452500	0.658591	1.00621e-06	NAC domain-containing protein 21/22 [UniProtKB/Swiss-Prot:Q84TE6]	Os06g0675600	NA
TraesCS2B02G351300	0.658587	1.11341e-08	NA	Os04g0471300	AT5G56210
TraesCS2B02G182000	0.658237	4.90031e-05	Probable calcium-binding protein CML46 [UniProtKB/Swiss-Prot:Q93Z27]	Os07g0631700	AT5G39670
TraesCS2B02G079100	0.658233	4.27776e-17	Ribulose bisphosphate carboxylase small chain PWS4.3, chloroplastic [UniProtKB/Swiss-Prot:P00871]	Os12g0274700	AT1G67090
TraesCS3B02G239400	0.658194	1.78255e-13	Protein ANTAGONIST OF LIKE HETEROCHROMATIN PROTEIN 1 [UniProtKB/Swiss-Prot:Q94K49]	Os01g0582600	AT5G12010
TraesCS6B02G432300	0.658019	1.98024e-32	Uncharacterized protein MJ1426 [UniProtKB/Swiss-Prot:Q58821]	Os02g0818000	NA
TraesCS4B02G006800	0.657799	0.000206415	Probable fatty acyl-CoA reductase 5 [UniProtKB/Swiss-Prot:Q0WRB0]	Os09g0567500	NA
TraesCS4D02G282600	0.657672	2.51028e-09	NA	Os03g0168300	NA
TraesCS7A02G429600	0.657262	9.42161e-11	NA	Os06g0694800	AT5G57345
TraesCS4D02G118500	0.657023	5.18368e-05	CBL-interacting protein kinase 14 [UniProtKB/Swiss-Prot:Q2QYM3]	Os11g0113700	AT5G01810
TraesCS6B02G401200	0.656953	0.000573428	NA	NA	NA
TraesCS1D02G083900	0.656711	1.92337e-18	Hydrophobic protein LTI6B [UniProtKB/Swiss-Prot:Q0DKW8]	Os05g0122700	AT3G05880
TraesCS1A02G270500	0.656493	0.00073116	Transmembrane protein 18 [UniProtKB/Swiss-Prot:Q3SZ36]	Os05g0432500	AT1G34350
TraesCS5A02G366100	0.656488	6.8792e-09	Potassium transporter 18 [UniProtKB/Swiss-Prot:Q653B6]	Os09g0563200	AT1G31120
TraesCS1B02G437600	0.655798	1.18976e-06	Protease Do-like 1, chloroplastic [UniProtKB/Swiss-Prot:O22609]	Os05g0568900	AT3G27925
TraesCS1A02G416100	0.655696	0.0024203	Probable calcium-binding protein CML14 [UniProtKB/Swiss-Prot:Q6L5F4]	Os05g0577500	AT1G18530
TraesCS7D02G501000	0.655121	4.61221e-18	Homeobox protein knotted-1-like 2 [UniProtKB/Swiss-Prot:Q0E3C3]	Os06g0646600	AT5G25220
TraesCS7B02G450100	0.654982	2.70685e-21	Senescence/dehydration-associated protein At3g51250 [UniProtKB/Swiss-Prot:Q9SD22]	Os06g0717100	NA
TraesCS7A02G141800	0.654697	1.72452e-16	Acyl-coenzyme A oxidase 2, peroxisomal [UniProtKB/Swiss-Prot:O65201]	Os11g0605500	AT5G65110
TraesCS1B02G294600	0.654506	1.55938e-05	Probable monofunctional riboflavin biosynthesis protein RIBA 3, chloroplastic [UniProtKB/Swiss-Prot:Q6L506]	Os05g0460600	AT5G59750
TraesCS2A02G368700	0.653651	0.000365381	Probable LRR receptor-like serine/threonine-protein kinase At1g63430 [UniProtKB/Swiss-Prot:C0LGH8]	Os04g0534200	NA
TraesCS7B02G078400	0.653378	1.04782e-06	NA	Os06g0215100	NA
TraesCS3A02G349800	0.653315	2.02424e-18	UPF0051 protein ABCI8, chloroplastic [UniProtKB/Swiss-Prot:Q9ZS97]	Os01g0830000	AT4G04770
TraesCS5A02G513200	0.653259	2.52545e-16	Beta-amylase 2, chloroplastic [UniProtKB/Swiss-Prot:Q10RZ1]	Os03g0141200	AT3G23920
TraesCS4B02G045700	0.652914	0.000534942	Zinc finger protein CONSTANS-LIKE 16 [UniProtKB/Swiss-Prot:Q8RWD0]	Os03g0711100	NA
TraesCS1A02G317900	0.652818	0.00022826	Peroxidase 1 [UniProtKB/Swiss-Prot:P37834]	Os05g0499300	AT3G21770
TraesCS1D02G310100	0.652538	0.0025851	Aldehyde dehydrogenase family 2 member C4 [UniProtKB/Swiss-Prot:Q56YU0]	Os01g0591300	AT3G24503
TraesCS7B02G170500	0.652447	6.57395e-13	E3 ubiquitin ligase BIG BROTHER-related [UniProtKB/Swiss-Prot:Q9LT17]	Os08g0548300	AT2G17730
TraesCS4D02G366100	0.652311	6.66664e-07	Palmitoyl-protein thioesterase 1 [UniProtKB/Swiss-Prot:Q20390]	Os10g0563000	AT5G47330
TraesCS5A02G440400	0.652109	2.46034e-11	bZIP transcription factor RISBZ2 [UniProtKB/Swiss-Prot:Q7X9A8]	Os03g0796900	NA
TraesCS2B02G132400	0.650448	0.00142593	UDP-glucosyltransferase 29 [UniProtKB/Swiss-Prot:A0A0A6ZFY4]	Os07g0672700	NA
TraesCS6A02G246400	0.650303	2.04228e-19	Probable phospholipid hydroperoxide glutathione peroxidase 6, mitochondrial [UniProtKB/Swiss-Prot:O48646]	Os04g0556300	AT3G63080
TraesCS4D02G094500	0.650299	2.46418e-23	Aldehyde dehydrogenase family 3 member H1 [UniProtKB/Swiss-Prot:Q70DU8]	Os11g0186200	AT1G44170
TraesCS5B02G068600	0.649942	1.0506e-06	Protein JINGUBANG [UniProtKB/Swiss-Prot:O48716]	Os12g0594000	NA
TraesCS5B02G408600	0.649795	0.00345407	CASP-like protein 5C1 [UniProtKB/Swiss-Prot:Q10EJ2]	Os03g0767900	AT4G37235
TraesCS4B02G054600	0.649638	0.000463136	NA	Os03g0723700	NA
TraesCS2B02G335000	0.649458	0.00403646	Uncharacterized membrane protein At3g27390 [UniProtKB/Swiss-Prot:Q8GUM4]	Os04g0449500	AT4G37030
TraesCS1D02G370600	0.648484	0.00145929	Phospholipase D beta 1 [UniProtKB/Swiss-Prot:P93733]	Os10g0524400	AT2G42010
TraesCS7B02G471600	0.64759	3.23227e-20	ATP-dependent zinc metalloprotease FTSH 1, chloroplastic [UniProtKB/Swiss-Prot:Q5Z974]	Os06g0725900	AT1G50250
TraesCS3A02G151900	0.646489	6.1542e-23	Probable chlorophyll(ide) b reductase NYC1, chloroplastic [UniProtKB/Swiss-Prot:Q5N800]	Os01g0227100	AT4G13250
TraesCS5D02G059700	0.646416	8.36185e-05	NAC domain-containing protein 21/22 [UniProtKB/Swiss-Prot:Q84TE6]	Os12g0610600	NA
TraesCS2A02G302700	0.646282	4.53566e-10	PI-PLC X domain-containing protein At5g67130 [UniProtKB/Swiss-Prot:Q93XX5]	Os04g0430200	AT1G49740
TraesCS5D02G166400	0.646081	8.10684e-08	Receptor like protein kinase S.2 [UniProtKB/Swiss-Prot:O48837]	Os09g0361100	NA
TraesCS5D02G200800	0.645879	9.46351e-13	Probable trehalose-phosphate phosphatase 7 [UniProtKB/Swiss-Prot:Q6H5L4]	Os09g0369400	AT4G39770
TraesCS1B02G334100	0.645717	0.00470677	Cyclic nucleotide-gated ion channel 4 [UniProtKB/Swiss-Prot:Q94AS9]	Os05g0502000	AT5G54250
TraesCS1A02G311800	0.645233	0.00226261	Zinc finger protein 830 [UniProtKB/Swiss-Prot:Q6DJ13]	Os05g0495100	NA
TraesCS1A02G441400	0.645192	4.6547e-06	Mitochondrial outer membrane protein porin of 36 kDa [UniProtKB/Swiss-Prot:P42056]	NA	NA
TraesCS2B02G242100	0.645	0.000181235	Cysteine-rich receptor-like protein kinase 6 [UniProtKB/Swiss-Prot:Q0D5R3]	Os07g0537000	NA
TraesCS6B02G425600	0.644916	6.25015e-10	NA	Os02g0815400	NA
TraesCS6B02G073600	0.644725	1.62436e-05	Protein LURP-one-related 15 [UniProtKB/Swiss-Prot:Q9LZX1]	Os07g0230700	AT5G01750
TraesCS7D02G324800	0.644579	3.52824e-10	Vesicle-associated membrane protein 714 [UniProtKB/Swiss-Prot:Q9FMR5]	Os10g0154000	AT5G22360
TraesCS2D02G134700	0.644052	1.53203e-05	Xylan glycosyltransferase MUCI21 [UniProtKB/Swiss-Prot:Q9SS43]	Os07g0657400	NA
TraesCS1B02G117400	0.644007	3.52076e-14	1-aminocyclopropane-1-carboxylate oxidase [UniProtKB/Swiss-Prot:Q9FR99]	Os05g0149400	AT1G77330
TraesCS5D02G270600	0.64316	0.00019389	Tonoplast dicarboxylate transporter [UniProtKB/Swiss-Prot:Q8LG88]	Os09g0484900	AT5G47560
TraesCS1B02G226500	0.64308	1.58355e-12	Pyruvate kinase isozyme G, chloroplastic [UniProtKB/Swiss-Prot:Q40546]	Os10g0571200	AT1G32440
TraesCS3D02G262900	0.642395	0.00291276	NA	Os01g0688600	AT3G18295
TraesCS1A02G424200	0.642011	3.27044e-05	Calcium-dependent protein kinase 15 [UniProtKB/Swiss-Prot:Q6I587]	Os05g0585500	AT4G23650
TraesCS2A02G348500	0.641942	9.75534e-13	Phosphoglycolate phosphatase 1B, chloroplastic [UniProtKB/Swiss-Prot:P0DKC4]	Os04g0490800	AT5G36790
TraesCS1A02G066900	0.641663	2.56398e-23	Protein SEEDLING PLASTID DEVELOPMENT 1 [UniProtKB/Swiss-Prot:F4J3R7]	Os07g0187400	AT3G10420
TraesCS7D02G508200	0.641448	5.61172e-05	Heptahelical transmembrane protein ADIPOR1 [UniProtKB/Swiss-Prot:B7F9G7]	Os06g0643700	AT2G40710
TraesCS2A02G126700	0.641364	1.14683e-09	Angio-associated migratory cell protein [UniProtKB/Swiss-Prot:Q5RCG7]	Os03g0685600	AT2G41500
TraesCS2A02G190700	0.641268	4.92728e-11	NADP-dependent glyceraldehyde-3-phosphate dehydrogenase [UniProtKB/Swiss-Prot:Q8LK61]	Os08g0440800	AT2G24270
TraesCS7A02G259200	0.641161	1.22461e-05	Uridine kinase-like protein 2, chloroplastic [UniProtKB/Swiss-Prot:Q9LK34]	Os08g0530000	AT5G40870
TraesCS1A02G381200	0.641092	1.14385e-06	ER membrane protein complex subunit 6 [UniProtKB/Swiss-Prot:Q1ZXH4]	NA	AT5G49540
TraesCS1B02G151300	0.641063	5.60585e-10	Heat shock 70 kDa protein 7, chloroplastic [UniProtKB/Swiss-Prot:Q9LTX9]	Os05g0303000	AT5G49910
TraesCS7D02G265500	0.640916	4.17974e-24	NA	Os08g0538600	NA
TraesCS2D02G148300	0.640499	1.79052e-07	C2 domain-containing protein At1g53590 [UniProtKB/Swiss-Prot:Q93XX4]	Os02g0313700	NA
TraesCS3A02G307900	0.640307	9.66164e-09	NA	NA	NA
TraesCS3A02G148000	0.640236	0.00104187	NA	Os01g0221400	AT5G41761
TraesCS2B02G418600	0.639763	4.73187e-06	Cytochrome P450 87A3 [UniProtKB/Swiss-Prot:Q7XU38]	Os04g0570500	AT1G12740
TraesCS6B02G260800	0.639391	7.27623e-07	Bifunctional nitrilase/nitrile hydratase NIT4 [UniProtKB/Swiss-Prot:Q6H849]	Os02g0635000	AT5G22300
TraesCS3A02G248000	0.639284	8.54281e-07	Alpha-amylase 3, chloroplastic [UniProtKB/Swiss-Prot:Q94A41]	Os01g0715400	AT1G69830
TraesCS5A02G498000	0.639108	7.61372e-23	Catalase-1 [UniProtKB/Swiss-Prot:Q43206]	Os03g0131200	AT1G20630
TraesCS4A02G006800	0.639017	1.43905e-06	NA	Os03g0181800	AT3G14170
TraesCS7A02G372200	0.638881	3.92969e-07	Heme-binding-like protein At3g10130, chloroplastic [UniProtKB/Swiss-Prot:Q9SR77]	Os06g0597900	AT5G20140
TraesCS1A02G317200	0.638517	5.60574e-21	B2 protein [UniProtKB/Swiss-Prot:P37707]	Os05g0498700	AT3G27090
TraesCS4D02G061800	0.638434	1.75052e-15	4-hydroxy-3-methylbut-2-enyl diphosphate reductase, chloroplastic [UniProtKB/Swiss-Prot:Q6AVG6]	Os03g0731900	AT4G34350
TraesCS3D02G171200	0.638351	2.04027e-07	E3 ubiquitin-protein ligase mib1 [UniProtKB/Swiss-Prot:Q6GNY1]	Os05g0298200	NA
TraesCS6B02G169700	0.63828	1.11089e-20	4-hydroxyphenylpyruvate dioxygenase [UniProtKB/Swiss-Prot:O48604]	Os02g0168100	AT1G06570
TraesCS6B02G246000	0.637883	1.79231e-09	Nicotinamidase 1 [UniProtKB/Swiss-Prot:Q8S8F9]	Os02g0606800	AT2G22570
TraesCS2B02G118400	0.637866	3.80845e-05	NAC domain-containing protein 100 [UniProtKB/Swiss-Prot:Q9FLJ2]	Os07g0684800	NA
TraesCS1B02G159800	0.63778	0.00239092	E3 ubiquitin-protein ligase AIRP2 [UniProtKB/Swiss-Prot:Q9M022]	Os10g0445400	AT5G01520
TraesCS7A02G338900	0.637659	5.44449e-22	Pheophytinase, chloroplastic [UniProtKB/Swiss-Prot:Q9FFZ1]	Os06g0354700	NA
TraesCS5B02G151000	0.637331	1.41947e-29	Ferritin-1, chloroplastic [UniProtKB/Swiss-Prot:P29036]	Os12g0106000	AT5G01600
TraesCS5B02G226500	0.637079	4.33916e-16	NA	Os09g0413600	NA
TraesCS1A02G084600	0.63666	0.00248415	NA	NA	NA
TraesCS2D02G117100	0.636628	2.95494e-05	Lipase [UniProtKB/Swiss-Prot:P19515]	Os07g0668700	AT5G18630
TraesCS1A02G186800	0.636475	0.00259613	Probable glutathione S-transferase GSTU6 [UniProtKB/Swiss-Prot:Q06398]	Os10g0528900	NA
TraesCS3B02G112400	0.63586	0.00012911	Serine/threonine-protein phosphatase 7 long form homolog [UniProtKB/Swiss-Prot:Q9LNG5]	Os01g0167800	NA
TraesCSU02G056300	0.635786	1.29532e-10	1-deoxy-D-xylulose 5-phosphate reductoisomerase, chloroplastic [UniProtKB/Swiss-Prot:Q8W250]	Os01g0106900	AT5G62790
TraesCS1A02G338900	0.635216	6.30768e-07	Homeobox protein HOX1A [UniProtKB/Swiss-Prot:P46605]	NA	NA
TraesCS1A02G245000	0.634681	4.32859e-09	E3 ubiquitin-protein ligase KEG [UniProtKB/Swiss-Prot:Q9FY48]	Os05g0392000	AT5G13530
TraesCS1A02G288800	0.634503	1.56442e-08	40S ribosomal protein S23 [UniProtKB/Swiss-Prot:P46297]	Os01g0834600	AT3G09680
TraesCS5D02G044400	0.634479	9.96395e-23	Chloroplast stem-loop binding protein of 41 kDa b, chloroplastic [UniProtKB/Swiss-Prot:Q9SA52]	Os12g0420200	AT1G09340
TraesCS1A02G350100	0.634354	0.00438581	NA	Os05g0530300	NA
TraesCS4D02G111900	0.633944	1.84607e-05	BEL1-like homeodomain protein 1 [UniProtKB/Swiss-Prot:Q9SJ56]	Os11g0158600	AT2G35940
TraesCS2A02G301400	0.633256	6.59459e-12	NA	NA	NA
TraesCS7B02G127900	0.633136	0.000271237	Uncharacterized WD repeat-containing protein C2A9.03 [UniProtKB/Swiss-Prot:Q9Y7K5]	Os02g0721600	AT5G56190
TraesCS1D02G041200	0.633025	2.32034e-16	Glucose-6-phosphate isomerase, cytosolic [UniProtKB/Swiss-Prot:P49105]	Os06g0256500	AT5G42740
TraesCS5A02G092800	0.632449	1.32907e-05	Calmodulin-binding protein 60 B [UniProtKB/Swiss-Prot:Q9FKL6]	Os12g0547600	NA
TraesCS1B02G133400	0.632374	0.000328406	Glycerophosphodiester phosphodiesterase GDPD6 [UniProtKB/Swiss-Prot:Q9SD81]	Os03g0603600	AT5G08030
TraesCS1D02G175700	0.632191	1.49923e-05	Cytochrome P450 89A2 [UniProtKB/Swiss-Prot:Q42602]	Os10g0515200	AT1G64900
TraesCS1A02G439400	0.631953	2.59215e-06	NA	NA	NA
TraesCS3D02G155800	0.631594	7.01483e-07	NA	Os01g0221500	AT2G46220
TraesCS2D02G129200	0.631561	4.85572e-08	Angio-associated migratory cell protein [UniProtKB/Swiss-Prot:Q5RCG7]	Os03g0685600	AT2G41500
TraesCS4A02G156300	0.631559	2.04141e-14	ABC transporter F family member 5 [UniProtKB/Swiss-Prot:Q9LV93]	Os11g0603200	AT5G64840
TraesCS4B02G349500	0.631272	0.000287299	Probable aquaporin TIP4-1 [UniProtKB/Swiss-Prot:Q75GA5]	Os05g0231700	NA
TraesCS7D02G451700	0.630858	0.000797686	NAC domain-containing protein 21/22 [UniProtKB/Swiss-Prot:Q84TE6]	Os06g0675600	NA
TraesCS6A02G043000	0.630744	1.7776e-05	Heavy metal-associated isoprenylated plant protein 27 [UniProtKB/Swiss-Prot:Q67ZW1]	Os04g0244800	AT5G66110
TraesCS6B02G432500	0.630738	0.00643614	Telomere-binding protein 1 [UniProtKB/Swiss-Prot:Q9LL45]	Os02g0817800	NA
TraesCS4B02G132800	0.630656	1.04339e-09	Calcium-binding protein CBP [UniProtKB/Swiss-Prot:Q2QY10]	Os12g0137100	AT5G04170
TraesCS7D02G346100	0.63035	1.18239e-19	Pheophytinase, chloroplastic [UniProtKB/Swiss-Prot:Q9FFZ1]	Os06g0354700	AT5G13800
TraesCS1A02G295700	0.630206	2.28074e-05	Histone H4 [UniProtKB/Swiss-Prot:P0CG89]	Os05g0466600	AT3G53730
TraesCS4D02G128400	0.629704	8.36862e-12	Ubiquitin-like protein 5 [UniProtKB/Swiss-Prot:Q9FGZ9]	Os12g0143100	AT5G42300
TraesCS3D02G109600	0.629264	3.75304e-14	ATP-dependent 6-phosphofructokinase 3 [UniProtKB/Swiss-Prot:Q94AA4]	Os01g0191700	AT5G56630
TraesCS2B02G132500	0.629123	0.00331577	UDP-glucosyltransferase 29 [UniProtKB/Swiss-Prot:A0A0A6ZFY4]	Os07g0672700	NA
TraesCS3D02G283700	0.628414	1.45661e-05	NA	Os01g0727500	AT4G18980
TraesCS6B02G174800	0.628175	7.71691e-05	V-type proton ATPase subunit D [UniProtKB/Swiss-Prot:Q9XGM1]	Os04g0643100	AT3G58730
TraesCS1A02G338200	0.62794	1.59844e-07	Probable alpha,alpha-trehalose-phosphate synthase [UDP-forming] 7 [UniProtKB/Swiss-Prot:Q9LMI0]	Os05g0517200	AT1G06410
TraesCS2B02G216400	0.627535	6.82671e-11	NADP-dependent glyceraldehyde-3-phosphate dehydrogenase [UniProtKB/Swiss-Prot:Q8LK61]	Os08g0440800	AT2G24270
TraesCS1A02G193500	0.627494	4.36601e-16	Probable plastid-lipid-associated protein 3, chloroplastic [UniProtKB/Swiss-Prot:Q7XBW5]	Os10g0575700	AT2G35490
TraesCS2A02G548200	0.627474	1.16266e-09	Polyamine oxidase 4 [UniProtKB/Swiss-Prot:Q7XR46]	Os04g0671200	AT1G65840
TraesCS5A02G125200	0.62732	0.000386964	Transcription factor LHW [UniProtKB/Swiss-Prot:Q9XIN0]	Os12g0160400	NA
TraesCS3B02G241600	0.62724	5.18991e-12	Cytokinin riboside 5'-monophosphate phosphoribohydrolase LOG [UniProtKB/Swiss-Prot:Q5ZC82]	Os01g0588900	AT3G53450
TraesCS3D02G524100	0.626758	1.7959e-08	ABC transporter D family member 1 [UniProtKB/Swiss-Prot:Q94FB9]	Os01g0966100	AT4G39850
TraesCS1A02G319100	0.626579	0.0065427	TraB domain-containing protein [UniProtKB/Swiss-Prot:Q58DF3]	Os05g0499500	AT1G05270
TraesCS2B02G459000	0.625897	0.000474636	Ubiquinol oxidase 1b, mitochondrial [UniProtKB/Swiss-Prot:O82766]	Os04g0600300	AT3G22370
TraesCS6B02G386500	0.625808	0.000215324	Probable serine incorporator [UniProtKB/Swiss-Prot:A7S4N4]	Os02g0792900	AT1G16180
TraesCS2B02G286900	0.625746	6.1537e-20	NA	NA	NA
TraesCS6B02G181000	0.625246	1.00897e-06	F-box protein At4g00755 [UniProtKB/Swiss-Prot:Q8LG03]	NA	NA
TraesCS5D02G424700	0.625206	0.00077453	Probable ribose-5-phosphate isomerase 4, chloroplastic [UniProtKB/Swiss-Prot:Q9FI13]	Os03g0781400	NA
TraesCS7A02G354000	0.625038	4.00411e-07	Berberine bridge enzyme-like Cyn d 4 [UniProtKB/Swiss-Prot:Q5QJ60]	Os06g0549600	NA
TraesCS2A02G307900	0.624529	5.39634e-15	NA	Os04g0439100	NA
TraesCS2D02G275000	0.624286	1.01737e-05	Exocyst complex component EXO70H1 [UniProtKB/Swiss-Prot:Q8VY27]	NA	NA
TraesCS7B02G251100	0.623427	2.01395e-10	Peroxidase 1 [UniProtKB/Swiss-Prot:A5H8G4]	Os01g0327100	NA
TraesCS2A02G170200	0.623107	1.20214e-06	Protein STRICTOSIDINE SYNTHASE-LIKE 4 [UniProtKB/Swiss-Prot:Q9SD07]	Os07g0614000	NA
TraesCS5B02G477000	0.622933	3.80041e-07	Triacylglycerol lipase SDP1 [UniProtKB/Swiss-Prot:Q9LZA6]	Os03g0810900	AT5G04040
TraesCS6D02G168500	0.622618	2.77434e-06	DEAD-box ATP-dependent RNA helicase 41 [UniProtKB/Swiss-Prot:Q0E2Z7]	Os02g0201900	AT3G02065
TraesCS3D02G283300	0.62247	0.000274464	GDSL esterase/lipase At5g45670 [UniProtKB/Swiss-Prot:Q9FK75]	Os01g0748500	AT4G18970
TraesCS6D02G254000	0.621509	4.40786e-09	Monodehydroascorbate reductase 2, peroxisomal [UniProtKB/Swiss-Prot:Q8S3R2]	Os02g0707100	AT3G27820
TraesCS7D02G534500	0.620983	9.02001e-20	ATP-dependent zinc metalloprotease FTSH 1, chloroplastic [UniProtKB/Swiss-Prot:Q5Z974]	Os06g0725900	AT1G50250
TraesCS5A02G025400	0.620873	8.1857e-22	Cationic amino acid transporter 2, vacuolar [UniProtKB/Swiss-Prot:Q9ASS7]	Os12g0623500	AT3G03720
TraesCS4A02G262600	0.620861	4.30536e-12	Glutamate decarboxylase 1 [UniProtKB/Swiss-Prot:Q42521]	Os03g0720300	AT2G02010
TraesCS6A02G366100	0.620252	1.47828e-10	NA	Os02g0799700	NA
TraesCS4A02G307800	0.61993	3.36881e-15	5-amino-6-(5-phospho-D-ribitylamino)uracil phosphatase, chloroplastic [UniProtKB/Swiss-Prot:Q9LDD5]	Os09g0569100	AT4G11570
TraesCS1A02G241300	0.619798	5.40792e-05	Hydroxyproline O-arabinosyltransferase PLENTY [UniProtKB/Swiss-Prot:A0A0A1H7M6]	Os05g0386000	AT5G13500
TraesCS5B02G196900	0.619771	2.83235e-18	NA	Os09g0376300	NA
TraesCS2A02G573900	0.619617	1.39345e-08	Peroxidase 12 [UniProtKB/Swiss-Prot:Q96520]	Os04g0688100	NA
TraesCS1A02G240600	0.619508	1.12468e-06	PH, RCC1 and FYVE domains-containing protein 1 [UniProtKB/Swiss-Prot:Q947D2]	Os05g0384800	AT5G12350
TraesCS6B02G358000	0.619464	0.00179505	Protein CPR-5 [UniProtKB/Swiss-Prot:Q9LV85]	Os02g0770100	NA
TraesCS5B02G508600	0.619072	0.000928054	Pumilio homolog 24 [UniProtKB/Swiss-Prot:Q9LRZ3]	Os03g0831100	AT3G16810
TraesCS3D02G320500	0.618823	1.28587e-09	Probable nucleoredoxin 2 [UniProtKB/Swiss-Prot:Q0JIL1]	Os01g0794400	NA
TraesCS7B02G256700	0.618631	3.84252e-05	6-hydroxynicotinate 3-monooxygenase [UniProtKB/Swiss-Prot:P86491]	Os06g0597600	AT5G11330
TraesCS1A02G177300	0.618425	4.11535e-05	Cytochrome P450 89A2 [UniProtKB/Swiss-Prot:Q42602]	Os10g0515200	AT1G64900
TraesCS3A02G022700	0.618268	2.60674e-09	Glycine-rich domain-containing protein 1 [UniProtKB/Swiss-Prot:Q9ZQ47]	NA	NA
TraesCS5D02G034700	0.618174	3.0948e-11	Ubiquitin carboxyl-terminal hydrolase 8 [UniProtKB/Swiss-Prot:Q9C585]	Os12g0621000	NA
TraesCS1D02G383100	0.618022	5.13616e-15	1,2-dihydroxy-3-keto-5-methylthiopentene dioxygenase 4 [UniProtKB/Swiss-Prot:Q7XEJ5]	Os10g0419500	AT5G43850
TraesCS7A02G324800	0.61794	0.00104223	UDP-galactose transporter 1 [UniProtKB/Swiss-Prot:Q9C521]	Os08g0104900	AT1G77610
TraesCS1A02G412900	0.617707	5.60741e-07	Malate dehydrogenase 1, mitochondrial [UniProtKB/Swiss-Prot:Q9ZP06]	Os05g0574400	AT1G53240
TraesCS6D02G214300	0.61715	1.1908e-13	Probable metal-nicotianamine transporter YSL14 [UniProtKB/Swiss-Prot:Q6H7J6]	Os02g0633300	AT1G65730
TraesCS2A02G197700	0.617129	0.000542359	Vacuole membrane protein KMS1 [UniProtKB/Swiss-Prot:Q5XF36]	Os07g0571500	AT4G14950
TraesCS1A02G341700	0.617119	0.00211628	Protein cereblon [UniProtKB/Swiss-Prot:Q68EH9]	Os05g0521500	NA
TraesCS5D02G569800	0.616809	1.05755e-14	PGR5-like protein 1A, chloroplastic [UniProtKB/Swiss-Prot:Q8H112]	Os03g0857400	AT4G22890
TraesCS6B02G395000	0.616602	0.000347945	NA	Os02g0798200	NA
TraesCS5D02G157200	0.615942	0.000247986	Protein NUCLEAR FUSION DEFECTIVE 4 [UniProtKB/Swiss-Prot:F4I9E1]	Os12g0106500	AT2G30300
TraesCS4B02G078200	0.615922	2.15388e-16	NA	Os03g0607500	AT2G14910
TraesCS5D02G375700	0.615652	2.27603e-07	Potassium transporter 18 [UniProtKB/Swiss-Prot:Q653B6]	Os09g0563200	AT1G31120
TraesCS1A02G363000	0.615539	3.43973e-05	Histone H4 [UniProtKB/Swiss-Prot:P0CG89]	Os05g0462700	AT1G07820
TraesCS1B02G202400	0.614676	1.77526e-05	Cytochrome P450 84A1 [UniProtKB/Swiss-Prot:Q42600]	Os10g0512400	AT4G36220
TraesCS4D02G242700	0.614618	0.00017917	Tubulin alpha-2 chain [UniProtKB/Swiss-Prot:O22348]	Os03g0219300	AT5G19780
TraesCS7A02G291000	0.614141	3.43778e-14	Thylakoid membrane protein slr0575 [UniProtKB/Swiss-Prot:Q55403]	Os08g0359000	AT5G38660
TraesCS4A02G145400	0.613942	3.90991e-05	Nicotianamine aminotransferase 1 [UniProtKB/Swiss-Prot:A0A0P0VI36]	Os11g0644800	NA
TraesCS4A02G185200	0.613862	3.17204e-14	Ubiquitin-like protein 5 [UniProtKB/Swiss-Prot:Q9FGZ9]	Os11g0145400	AT5G42300
TraesCS7A02G294700	0.613801	1.93029e-13	NA	Os08g0162600	AT5G17170
TraesCS1A02G320500	0.613581	2.88826e-10	NAD(P)H dehydrogenase (quinone) FQR1 [UniProtKB/Swiss-Prot:Q9LSQ5]	Os05g0501300	AT5G54500
TraesCS5D02G481600	0.613408	6.99361e-06	KH domain-containing protein SPIN1 [UniProtKB/Swiss-Prot:Q75GR5]	Os03g0815700	AT2G38610
TraesCS2A02G355600	0.613158	0.000227778	PsbP domain-containing protein 4, chloroplastic [UniProtKB/Swiss-Prot:O49292]	Os12g0190200	AT1G77090
TraesCS3A02G156800	0.613011	5.08406e-24	Salt stress root protein RS1 [UniProtKB/Swiss-Prot:Q0JPA6]	Os01g0233000	NA
TraesCS3A02G247000	0.612965	3.2161e-06	Ras-related protein RABA1f [UniProtKB/Swiss-Prot:Q9FJH0]	Os01g0667600	AT1G28550
TraesCS7D02G381000	0.612942	0.00194731	Auxin-responsive protein SAUR32 [UniProtKB/Swiss-Prot:Q9ZUZ3]	Os06g0714300	NA
TraesCS4A02G214300	0.612939	0.00298064	NA	Os11g0198200	NA
TraesCS6A02G231300	0.612709	2.30968e-21	Temperature-induced lipocalin-1 [UniProtKB/Swiss-Prot:Q9FGT8]	Os02g0612900	AT5G58070
TraesCS4A02G317900	0.612205	7.515e-07	Probable cytokinin riboside 5'-monophosphate phosphoribohydrolase LOGL5 [UniProtKB/Swiss-Prot:Q84M85]	Os03g0857900	AT5G03270
TraesCS4B02G119500	0.612025	6.63195e-14	NA	Os12g0112200	AT5G01800
TraesCS3D02G164500	0.611047	1.59704e-21	Salt stress root protein RS1 [UniProtKB/Swiss-Prot:Q0JPA6]	Os01g0233000	NA
TraesCS2D02G338000	0.61053	2.82848e-05	Glycosyl hydrolase 5 family protein [UniProtKB/Swiss-Prot:C0HLA0]	Os04g0481000	AT1G13130
TraesCS4B02G355100	0.610089	0.00191907	Peroxisomal membrane protein 11-1 [UniProtKB/Swiss-Prot:Q10SM7]	Os03g0117100	AT3G61070
TraesCS3B02G382400	0.608988	4.07828e-13	UPF0051 protein ABCI8, chloroplastic [UniProtKB/Swiss-Prot:Q9ZS97]	Os01g0830000	AT4G04770
TraesCS2A02G133900	0.608335	2.58671e-05	NA	Os07g0656700	AT5G13720
TraesCS3B02G210300	0.60824	0.000836902	Cyclic dof factor 2 [UniProtKB/Swiss-Prot:Q93ZL5]	Os01g0264000	NA
TraesCS6A02G293200	0.607737	0.00421107	Zinc finger protein CONSTANS-LIKE 16 [UniProtKB/Swiss-Prot:Q8RWD0]	Os02g0731700	NA
TraesCS3A02G265900	0.607718	3.55732e-09	D-glycerate 3-kinase, chloroplastic [UniProtKB/Swiss-Prot:Q944I4]	Os01g0682500	AT1G80380
TraesCS4A02G226400	0.607373	1.4725e-05	Non-lysosomal glucosylceramidase [UniProtKB/Swiss-Prot:Q5M868]	Os11g0242100	AT1G33700
TraesCS3D02G534100	0.607228	1.40798e-14	Vacuolar-processing enzyme [UniProtKB/Swiss-Prot:P49043]	Os01g0559600	AT4G32940
TraesCS2D02G304500	0.607164	0.00102519	Glutathione S-transferase TCHQD [UniProtKB/Swiss-Prot:O80662]	Os04g0435500	AT1G77290
TraesCS1A02G288400	0.607151	2.65971e-07	NA	Os05g0463500	AT3G09670
TraesCS6D02G337200	0.606972	3.21407e-05	Protein HEADING DATE REPRESSOR 1 [UniProtKB/Swiss-Prot:Q6K678]	Os02g0793900	NA
TraesCS2B02G414500	0.606586	0.000834431	Beta-carotene 3-hydroxylase, chloroplastic [UniProtKB/Swiss-Prot:B3SGL0]	Os04g0578400	AT4G25700
TraesCS6B02G328600	0.606523	0.00343956	MACPF domain-containing protein At1g14780 [UniProtKB/Swiss-Prot:Q8L612]	Os02g0736300	AT1G14780
TraesCS5B02G481200	0.605792	2.06987e-05	KH domain-containing protein SPIN1 [UniProtKB/Swiss-Prot:Q75GR5]	Os03g0815700	AT2G38610
TraesCS2D02G139500	0.605517	5.30134e-08	Protein SSUH2 homolog [UniProtKB/Swiss-Prot:Q08C76]	Os05g0316200	AT2G38000
TraesCS2B02G289300	0.605291	5.7227e-05	Protein phosphatase 1 regulatory subunit INH3 [UniProtKB/Swiss-Prot:Q8S8F7]	Os04g0295000	NA
TraesCS2D02G095800	0.605188	4.29403e-19	Galactinol synthase 2 [UniProtKB/Swiss-Prot:Q9FXB2]	Os07g0687900	AT2G47180
TraesCS6B02G383200	0.604113	6.74123e-24	Cold shock protein CS66 [UniProtKB/Swiss-Prot:P46526]	NA	NA
TraesCS2A02G322300	0.603827	7.45305e-09	NA	Os04g0482900	AT5G40500
TraesCS7B02G042100	0.603675	0.00534569	Protein SRG1 [UniProtKB/Swiss-Prot:Q39224]	Os06g0176850	NA
TraesCS1B02G073600	0.60351	0.00446914	F-box protein SKIP1 [UniProtKB/Swiss-Prot:Q9FDX1]	Os08g0269800	NA
TraesCS5A02G205300	0.603183	7.63577e-05	NA	Os09g0400700	NA
TraesCS1D02G194700	0.601917	1.25441e-08	Plant intracellular Ras-group-related LRR protein 5 [UniProtKB/Swiss-Prot:Q8S7M7]	Os10g0572300	NA
TraesCS2D02G391700	0.601655	6.07299e-10	NA	Os04g0583200	NA
TraesCS2B02G411800	0.60137	5.67547e-08	NA	Os04g0583200	NA
TraesCS3D02G039300	0.600691	5.46081e-09	Chitinase CLP [UniProtKB/Swiss-Prot:Q8S1V1]	NA	NA
TraesCS2A02G336600	0.600166	0.00181763	Vacuolar iron transporter 1 [UniProtKB/Swiss-Prot:Q6MWE5]	Os04g0463400	AT2G01770
TraesCS2B02G324400	0.599329	1.85423e-12	NA	Os04g0439100	NA
TraesCS4B02G053900	0.599203	7.60898e-06	NA	Os03g0723400	AT5G66780
TraesCS5B02G160800	0.598434	0.000543451	NA	Os09g0127700	NA
TraesCS5B02G001100	0.597961	1.88798e-05	Protein NRT1/ PTR FAMILY 2.11 [UniProtKB/Swiss-Prot:Q9LV10]	Os12g0638300	NA
TraesCS3D02G247000	0.597952	2.9546e-05	Putative methyltransferase DDB_G0268948 [UniProtKB/Swiss-Prot:Q55EX9]	Os01g0716500	NA
TraesCS4A02G172000	0.597562	1.92631e-06	Beta-glucosidase-like SFR2, chloroplastic [UniProtKB/Swiss-Prot:Q8L6H7]	Os11g0683500	AT3G06510
TraesCS5D02G399000	0.597414	7.85947e-26	Beta-glucosidase BoGH3B [UniProtKB/Swiss-Prot:A7LXU3]	Os03g0749500	AT5G20950
TraesCS7D02G351300	0.597211	2.8151e-09	Chitinase 1 [UniProtKB/Swiss-Prot:Q9SLP4]	Os10g0416500	NA
TraesCS1D02G382400	0.597142	2.37442e-06	NA	Os08g0410500	AT1G78130
TraesCS1D02G274000	0.596783	0.000108084	Fructose-1,6-bisphosphatase, cytosolic [UniProtKB/Swiss-Prot:Q9SDL8]	Os01g0866400	AT1G43670
TraesCS5D02G129400	0.596377	4.31427e-07	Ethylene-responsive transcription factor ERF112 [UniProtKB/Swiss-Prot:P93007]	Os12g0168100	AT1G43160
TraesCS3B02G243000	0.595901	0.00170182	FCS-Like Zinc finger 11 [UniProtKB/Swiss-Prot:Q9SL94]	Os01g0593200	NA
TraesCS2A02G202300	0.595653	7.67059e-07	Peptidyl-prolyl cis-trans isomerase CYP37, chloroplastic [UniProtKB/Swiss-Prot:P82869]	Os07g0565600	AT3G15520
TraesCS2B02G308000	0.595537	1.6645e-09	NA	Os04g0405600	AT5G47860
TraesCS7A02G461200	0.595203	0.00122317	Protein NRT1/ PTR FAMILY 5.1 [UniProtKB/Swiss-Prot:Q8VZR7]	Os05g0336200	AT2G40460
TraesCS6B02G249600	0.595184	0.00664381	Phosphatidyl-N-methylethanolamine N-methyltransferase [UniProtKB/Swiss-Prot:Q9SAH5]	Os02g0612100	AT1G80860
TraesCS5B02G181200	0.595165	0.00196374	Nudix hydrolase 20, chloroplastic [UniProtKB/Swiss-Prot:Q8VXZ0]	Os09g0322200	AT5G19460
TraesCS7D02G350700	0.595021	1.13338e-06	Heme-binding-like protein At3g10130, chloroplastic [UniProtKB/Swiss-Prot:Q9SR77]	Os06g0597900	AT5G20140
TraesCS2B02G177300	0.59488	0.001992	Cytochrome P450 709B1 [UniProtKB/Swiss-Prot:Q9ASR3]	Os07g0635500	NA
TraesCS7B02G115500	0.594757	1.73986e-12	Autophagy-related protein 2 [UniProtKB/Swiss-Prot:F8S296]	Os06g0267600	NA
TraesCS1D02G293100	0.594582	6.51635e-10	Protein RETICULATA-RELATED 5, chloroplastic [UniProtKB/Swiss-Prot:Q9SIY5]	Os05g0474600	AT2G40400
TraesCS6B02G191000	0.594536	0.000180202	NA	Os04g0411800	AT1G74300
TraesCS3B02G413800	0.594464	7.8625e-16	Serine/threonine-protein kinase SAPK4 [UniProtKB/Swiss-Prot:Q5N942]	Os01g0869900	AT1G60940
TraesCS5D02G506000	0.594263	7.51689e-05	NA	NA	NA
TraesCS6D02G397200	0.593771	4.09365e-17	Probable L-ascorbate peroxidase 8, chloroplastic [UniProtKB/Swiss-Prot:Q69SV0]	Os02g0553200	AT1G77490
TraesCS1A02G201400	0.593652	0.000366923	Protein PLASTID MOVEMENT IMPAIRED 1 [UniProtKB/Swiss-Prot:Q9C8E6]	Os10g0539700	NA
TraesCS2D02G200400	0.593538	0.000121865	Bet1-like protein At4g14600 [UniProtKB/Swiss-Prot:Q8VXX9]	Os07g0577900	AT4G14600
TraesCS1D02G185500	0.593386	0.0015121	AAA-ATPase At2g46620 [UniProtKB/Swiss-Prot:F4IJ77]	Os10g0519300	NA
TraesCS6D02G185900	0.592927	5.95736e-05	Probable WRKY transcription factor 19 [UniProtKB/Swiss-Prot:Q9SZ67]	Os02g0575700	NA
TraesCS6B02G277000	0.592835	9.01876e-05	Vesicle-associated protein 1-3 [UniProtKB/Swiss-Prot:Q84WW5]	Os02g0661900	AT2G45140
TraesCS3B02G266500	0.592605	0.000308015	NA	Os01g0656600	NA
TraesCS3B02G579400	0.592186	4.45951e-11	MACPF domain-containing protein At4g24290 [UniProtKB/Swiss-Prot:Q9STW5]	Os01g0958700	AT4G24290
TraesCS2B02G535400	0.592045	5.97424e-20	Endonuclease 4 [UniProtKB/Swiss-Prot:F4JJL0]	Os04g0652700	NA
TraesCS4B02G035300	0.591652	7.09202e-05	NA	Os03g0695500	NA
TraesCS5D02G465300	0.591637	1.44271e-10	Probable lactoylglutathione lyase, chloroplastic [UniProtKB/Swiss-Prot:Q8W593]	Os02g0280500	AT1G67280
TraesCS7B02G444800	0.591506	0.000138384	Aspartyl protease family protein At5g10770 [UniProtKB/Swiss-Prot:Q8S9J6]	Os02g0314600	NA
TraesCS5A02G425700	0.591084	0.000426639	NA	Os03g0787100	AT3G11800
TraesCS7A02G236400	0.590674	7.39279e-05	BTB/POZ domain-containing protein At1g55760 [UniProtKB/Swiss-Prot:Q680K8]	Os08g0495500	AT1G55760
TraesCS4D02G342200	0.590003	3.63847e-05	Serine/threonine-protein kinase ATG1a [UniProtKB/Swiss-Prot:Q94C95]	Os03g0122000	NA
TraesCS1B02G235000	0.589108	1.66987e-05	Sorting nexin 2B [UniProtKB/Swiss-Prot:B9DFS6]	Os05g0346100	AT5G58440
TraesCS3B02G108000	0.589004	5.42709e-13	Galactinol--sucrose galactosyltransferase [UniProtKB/Swiss-Prot:Q5VQG4]	Os01g0170000	AT5G40390
TraesCS3A02G426500	0.588848	0.00405411	NA	Os01g0919600	NA
TraesCS7D02G347300	0.588651	2.02754e-12	Peroxidase 1 [UniProtKB/Swiss-Prot:A5H8G4]	Os01g0327100	NA
TraesCS1A02G262500	0.588271	0.000587628	Cold shock protein 1 [UniProtKB/Swiss-Prot:O65639]	Os05g0524666	NA
TraesCS7A02G127700	0.587699	1.82846e-06	F-box protein At5g67140 [UniProtKB/Swiss-Prot:Q9FH99]	Os06g0166000	AT5G67140
TraesCS6A02G197800	0.586996	1.82931e-05	NA	Os02g0481700	NA
TraesCS4D02G013600	0.586829	3.84446e-12	Glucan endo-1,3-beta-glucosidase 8 [UniProtKB/Swiss-Prot:Q6NKW9]	Os03g0656800	AT2G19440
TraesCS2D02G055600	0.586756	0.00491465	ABC transporter C family member 4 [UniProtKB/Swiss-Prot:Q7DM58]	Os04g0209200	AT2G47800
TraesCS1B02G376900	0.58655	0.000409842	Probable ADP,ATP carrier protein At5g56450 [UniProtKB/Swiss-Prot:Q9FM86]	Os05g0539600	AT5G56450
TraesCS3B02G290300	0.586212	7.92491e-15	ABC transporter B family member 4 [UniProtKB/Swiss-Prot:O80725]	Os01g0695800	AT2G47000
TraesCS6B02G273400	0.585794	2.93227e-31	Dehydrin COR410 [UniProtKB/Swiss-Prot:P46524]	Os02g0669100	AT1G76180
TraesCS4D02G127600	0.585744	7.48023e-10	Calcium-binding protein CBP [UniProtKB/Swiss-Prot:Q2QY10]	Os12g0137100	AT5G04170
TraesCS6B02G246700	0.585412	0.000621161	NA	Os02g0606000	AT3G59640
TraesCS1A02G128100	0.585212	1.12373e-06	NA	Os05g0215600	NA
TraesCS3D02G214600	0.585173	4.40857e-05	Light-harvesting complex-like protein OHP2, chloroplastic [UniProtKB/Swiss-Prot:Q9FEC1]	Os01g0589800	NA
TraesCS1D02G288300	0.585138	0.000355172	NA	Os05g0464300	NA
TraesCS3B02G276700	0.585044	5.17681e-11	Alpha-amylase 3, chloroplastic [UniProtKB/Swiss-Prot:Q94A41]	Os01g0715400	AT1G69830
TraesCS3B02G597800	0.584739	0.000226392	Vacuolar-processing enzyme [UniProtKB/Swiss-Prot:P49043]	Os01g0559600	AT4G32940
TraesCS7A02G533000	0.584574	8.81501e-19	Senescence/dehydration-associated protein At3g51250 [UniProtKB/Swiss-Prot:Q9SD22]	Os06g0717100	NA
TraesCS5D02G413900	0.58438	6.48906e-06	CASP-like protein 5C1 [UniProtKB/Swiss-Prot:Q10EJ2]	Os03g0767900	AT4G37235
TraesCS1D02G271000	0.584236	6.27946e-06	Serine/threonine-protein kinase SAPK4 [UniProtKB/Swiss-Prot:Q5N942]	Os01g0869900	AT5G50000
TraesCS4A02G198200	0.584221	0.000163014	Probable F-box protein At2g36090 [UniProtKB/Swiss-Prot:Q9SIH5]	Os11g0155100	AT2G36090
TraesCS1A02G040600	0.584145	4.89575e-11	Glucose-6-phosphate isomerase, cytosolic [UniProtKB/Swiss-Prot:P49105]	Os06g0256500	AT5G42740
TraesCS3D02G277600	0.584102	0.000326335	NA	Os01g0739500	AT5G56550
TraesCS1D02G089900	0.584076	1.84887e-07	Tryptamine hydroxycinnamoyltransferase 2 [UniProtKB/Swiss-Prot:Q8LMI4]	Os10g0380100	NA
TraesCS4B02G223400	0.583628	4.81936e-15	NA	Os03g0250000	AT4G38810
TraesCS3D02G332400	0.583307	0.00191571	Uncharacterized protein At5g19025 [UniProtKB/Swiss-Prot:P0C8Q9]	Os01g0815100	NA
TraesCS6B02G271500	0.583267	1.52847e-11	Amino acid transporter AVT3B [UniProtKB/Swiss-Prot:F4ILY9]	Os02g0670900	AT2G42005
TraesCS5A02G303400	0.583236	0.000202064	2-alkenal reductase (NADP(+)-dependent) [UniProtKB/Swiss-Prot:Q9SLN8]	Os09g0459800	AT3G59845
TraesCS2D02G218800	0.58303	2.07252e-05	Probable proteasome inhibitor [UniProtKB/Swiss-Prot:Q9M330]	Os07g0548900	NA
TraesCS4D02G179800	0.582988	0.00272363	Calmodulin [UniProtKB/Swiss-Prot:P62162]	Os03g0319300	AT2G27030
TraesCS5D02G375500	0.582891	0.000188621	Senescence-specific cysteine protease SAG12 [UniProtKB/Swiss-Prot:Q9FJ47]	Os09g0564200	NA
TraesCS7D02G088000	0.582783	2.00385e-06	Early nodulin-93 [UniProtKB/Swiss-Prot:Q02921]	Os06g0141700	NA
TraesCS5A02G184500	0.582779	3.02914e-16	Putative glucose-6-phosphate 1-epimerase [UniProtKB/Swiss-Prot:Q40784]	Os09g0327400	AT5G66530
TraesCS7A02G106100	0.582527	0.000621415	Anthranilate N-benzoyltransferase protein 1 [UniProtKB/Swiss-Prot:O24645]	Os06g0151100	NA
TraesCS1B02G148100	0.582393	1.38752e-08	NA	Os05g0215600	NA
TraesCS1D02G187300	0.582377	4.79412e-09	Probable E3 ubiquitin-protein ligase XBOS33 [UniProtKB/Swiss-Prot:Q337A0]	Os10g0521600	AT5G07270
TraesCS7A02G137000	0.582308	7.4877e-21	Protochlorophyllide-dependent translocon component 52, chloroplastic [UniProtKB/Swiss-Prot:Q8W496]	NA	NA
TraesCS6D02G135800	0.581642	9.77665e-05	Glucose-6-phosphate 1-dehydrogenase, chloroplastic [UniProtKB/Swiss-Prot:O24357]	Os03g0412800	AT5G13110
TraesCS3B02G429000	0.581631	1.35607e-07	NA	Os01g0898800	AT2G43340
TraesCS3B02G566000	0.58157	0.000165571	NAD(P)H-quinone oxidoreductase subunit O, chloroplastic [UniProtKB/Swiss-Prot:Q9S829]	Os01g0959900	AT1G74880
TraesCS3A02G180600	0.581141	0.000916404	Cyclic dof factor 2 [UniProtKB/Swiss-Prot:Q93ZL5]	Os01g0264000	NA
TraesCS4B02G283800	0.581124	1.59486e-09	NA	Os03g0168300	NA
TraesCS3A02G163100	0.581065	0.000370319	NA	Os01g0241100	NA
TraesCS3D02G061700	0.580804	0.00279013	indole-2-monooxygenase [UniProtKB/Swiss-Prot:Q43257]	NA	NA
TraesCS7B02G231700	0.580696	0.003706	NA	NA	NA
TraesCS3B02G240500	0.580649	3.05291e-05	NA	Os01g0585300	AT1G74730
TraesCS5A02G017900	0.580633	5.56647e-09	Thaumatin-like protein [UniProtKB/Swiss-Prot:P81370]	Os12g0630500	NA
TraesCS6A02G286400	0.580444	2.96697e-07	Zinc finger protein CONSTANS-LIKE 10 [UniProtKB/Swiss-Prot:Q9LUA9]	Os02g0724000	NA
TraesCS7B02G038300	0.580404	2.25988e-18	Protochlorophyllide-dependent translocon component 52, chloroplastic [UniProtKB/Swiss-Prot:Q8W496]	Os03g0805700	NA
TraesCS4A02G195700	0.580303	1.21872e-12	NA	Os12g0112200	AT5G01800
TraesCS1A02G331200	0.580225	0.00142378	Translation initiation factor IF-2 [UniProtKB/Swiss-Prot:A7HZ93]	Os05g0575300	AT4G11160
TraesCS7B02G170400	0.579788	0.00419717	Chaperone protein dnaJ 11, chloroplastic [UniProtKB/Swiss-Prot:Q9FYB5]	Os08g0548400	AT4G36040
TraesCS4B02G069900	0.579686	6.15749e-09	Calcineurin B-like protein 3 [UniProtKB/Swiss-Prot:Q75LU8]	Os03g0626800	AT5G55990
TraesCS2A02G369800	0.579685	2.69374e-18	Remorin [UniProtKB/Swiss-Prot:P93788]	Os04g0533300	AT3G61260
TraesCS6D02G359300	0.579573	0.000366103	Protein SRG1 [UniProtKB/Swiss-Prot:Q39224]	NA	NA
TraesCS2B02G137100	0.579393	1.12597e-05	Probable GTP-binding protein OBGC1, chloroplastic [UniProtKB/Swiss-Prot:Q0D3S3]	Os07g0669250	AT5G18570
TraesCS7A02G328600	0.579103	2.24255e-12	Pre-mRNA cleavage factor Im 25 kDa subunit 1 [UniProtKB/Swiss-Prot:Q94AF0]	Os08g0398800	AT4G29820
TraesCS3D02G195800	0.579065	0.00299799	CRS2-associated factor 2, chloroplastic [UniProtKB/Swiss-Prot:Q84N48]	Os01g0323300	NA
TraesCS6B02G041100	0.578699	0.000722392	Germin-like protein 2-4 [UniProtKB/Swiss-Prot:Q6ESF0]	Os02g0532500	NA
TraesCS7B02G188000	0.578478	4.56087e-14	Protein LHY [UniProtKB/Swiss-Prot:Q6R0H1]	Os08g0157600	NA
TraesCS5A02G531400	0.57844	0.00118501	E3 ubiquitin-protein ligase SINA-like 10 [UniProtKB/Swiss-Prot:Q84K34]	Os06g0311300	NA
TraesCS2A02G292900	0.578397	4.1306e-12	Neutral/alkaline invertase 3, chloroplastic [UniProtKB/Swiss-Prot:Q6H6N5]	Os04g0409900	AT5G22510
TraesCS6B02G284000	0.578386	0.00045717	Cytochrome b5 isoform E [UniProtKB/Swiss-Prot:Q42342]	Os02g0649800	AT2G46650
TraesCS5B02G124100	0.578289	2.53826e-17	Actin-3 [UniProtKB/Swiss-Prot:Q10AZ4]	Os12g0163700	AT5G09810
TraesCS2D02G356200	0.578275	0.000424546	Protein NUCLEAR FUSION DEFECTIVE 4 [UniProtKB/Swiss-Prot:F4I9E1]	Os04g0502800	NA
TraesCS7A02G014200	0.577931	0.00279865	Scarecrow-like protein 6 [UniProtKB/Swiss-Prot:O81316]	Os06g0105350	NA
TraesCS1A02G311100	0.577916	2.76848e-05	Polygalacturonase At1g48100 [UniProtKB/Swiss-Prot:Q949Z1]	Os05g0578600	AT1G02460
TraesCS3B02G327600	0.57785	1.11037e-08	NA	Os01g0754500	NA
TraesCS6A02G412900	0.577653	5.50791e-18	Probable L-ascorbate peroxidase 8, chloroplastic [UniProtKB/Swiss-Prot:Q69SV0]	Os02g0553200	AT1G77490
TraesCS7B02G169500	0.5774	4.35669e-13	Flavonoid 3'-monooxygenase CYP75B137 [UniProtKB/Swiss-Prot:A0A4D6Q415]	Os08g0547900	NA
TraesCS6D02G203800	0.577272	2.86734e-21	Temperature-induced lipocalin-1 [UniProtKB/Swiss-Prot:Q9FGT8]	Os02g0612900	AT5G58070
TraesCS1B02G478400	0.577207	1.29768e-19	UDP-glucose 4-epimerase 1 [UniProtKB/Swiss-Prot:Q8LNZ3]	Os05g0595100	AT4G23920
TraesCS7B02G081400	0.577125	1.20574e-05	NA	NA	NA
TraesCS6A02G078400	0.57692	6.77902e-08	NA	NA	NA
TraesCS6B02G370600	0.576467	3.0173e-05	Ribonuclease 1 [UniProtKB/Swiss-Prot:P42813]	Os08g0434100	AT2G02990
TraesCS1D02G283900	0.576394	1.75529e-09	Chitinase 2 [UniProtKB/Swiss-Prot:Q7M443]	Os10g0416800	NA
TraesCS1D02G131200	0.576263	2.3936e-05	Ferrochelatase-2, chloroplastic [UniProtKB/Swiss-Prot:A2Y3Q5]	Os05g0361200	AT2G30390
TraesCS6B02G299500	0.576149	0.000582555	Lipid phosphate phosphatase epsilon 2, chloroplastic [UniProtKB/Swiss-Prot:Q6NQL6]	Os02g0704500	NA
TraesCS2A02G113500	0.575822	8.06442e-06	UDP-glucosyltransferase 29 [UniProtKB/Swiss-Prot:A0A0A6ZFY4]	Os07g0672700	NA
TraesCS5D02G181600	0.575399	8.5164e-09	Bifunctional aspartokinase/homoserine dehydrogenase 2, chloroplastic [UniProtKB/Swiss-Prot:P49080]	Os09g0294000	AT1G31230
TraesCS2D02G138800	0.575333	0.00202352	Lipase [UniProtKB/Swiss-Prot:P19515]	Os07g0668700	AT5G18640
TraesCS2A02G303200	0.575331	0.00382937	Thioredoxin M3, chloroplastic [UniProtKB/Swiss-Prot:Q7XQQ2]	Os04g0430800	AT1G21750
TraesCS2B02G491200	0.575224	3.90842e-20	Autophagy-related protein 8C [UniProtKB/Swiss-Prot:Q6Z1D5]	Os04g0624000	AT1G62040
TraesCS5D02G170700	0.575166	2.9378e-11	Zinc finger protein CO3 [UniProtKB/Swiss-Prot:O82117]	Os09g0240200	NA
TraesCS7B02G349000	0.575154	8.29514e-08	Cytochrome P450 72A15 [UniProtKB/Swiss-Prot:Q9LUC5]	Os01g0627500	AT3G14680
TraesCS2A02G420800	0.574943	1.15132e-15	Lecithin-cholesterol acyltransferase-like 4 [UniProtKB/Swiss-Prot:Q71N54]	Os04g0615100	AT4G19860
TraesCS7B02G493700	0.57467	3.8568e-07	Basic endochitinase A [UniProtKB/Swiss-Prot:Q9FRV1]	Os05g0399300	AT3G12500
TraesCS6A02G293400	0.574426	1.80214e-06	NA	Os10g0181600	NA
TraesCS2B02G459300	0.574372	0.00359129	Ubiquinol oxidase 1a, mitochondrial [UniProtKB/Swiss-Prot:O82807]	Os04g0600200	AT3G22370
TraesCS1A02G259600	0.574268	0.000145657	Probably inactive leucine-rich repeat receptor-like protein kinase At5g48380 [UniProtKB/Swiss-Prot:Q9ASS4]	Os05g0414700	AT5G48380
TraesCS2D02G501700	0.574258	0.000357586	Ribulose bisphosphate carboxylase/oxygenase activase, chloroplastic [UniProtKB/Swiss-Prot:O49074]	Os04g0658300	AT1G73110
TraesCS3A02G234900	0.574243	0.00111072	GDSL esterase/lipase At1g28600 [UniProtKB/Swiss-Prot:Q94F40]	Os01g0649200	NA
TraesCS3D02G218800	0.573966	0.00300584	DnaJ homolog subfamily B member 6-A [UniProtKB/Swiss-Prot:Q5FWN8]	Os01g0606900	NA
TraesCS1A02G234500	0.57394	0.00613423	NA	NA	NA
TraesCS4B02G226700	0.573529	0.000933277	UDP-glycosyltransferase 83A1 [UniProtKB/Swiss-Prot:Q9SGA8]	NA	NA
TraesCS6A02G167800	0.573429	0.00208056	SWI/SNF complex subunit SWI3B [UniProtKB/Swiss-Prot:Q84JG2]	Os02g0194000	NA
TraesCS4A02G396600	0.573116	3.80571e-08	Iron-sulfur assembly protein IscA, chloroplastic [UniProtKB/Swiss-Prot:Q9XIK3]	Os06g0146400	AT1G10500
TraesCS4B02G271800	0.573096	5.46921e-09	Uclacyanin 1 [UniProtKB/Swiss-Prot:O82081]	NA	NA
TraesCS2D02G291100	0.573082	1.27263e-14	Neutral/alkaline invertase 3, chloroplastic [UniProtKB/Swiss-Prot:Q6H6N5]	Os04g0409900	AT5G22510
TraesCS1B02G272700	0.572757	0.00262825	Uncharacterized hydrolase YugF [UniProtKB/Swiss-Prot:O05235]	Os05g0419000	AT5G38520
TraesCS7D02G299000	0.571444	0.00099504	Protein ENHANCED DISEASE RESISTANCE 2-like [UniProtKB/Swiss-Prot:Q8VZF6]	Os08g0152600	AT1G06050
TraesCS5A02G148500	0.570556	1.99622e-08	NA	Os12g0112200	AT5G01800
TraesCS6B02G306700	0.570544	4.2936e-05	Diacylglycerol O-acyltransferase 2D [UniProtKB/Swiss-Prot:K7K424]	Os02g0714100	AT3G51520
TraesCS5B02G162100	0.570532	1.26836e-20	Probable plastid-lipid-associated protein 2, chloroplastic [UniProtKB/Swiss-Prot:Q6K439]	Os09g0133600	AT4G04020
TraesCS3D02G358500	0.570361	9.63815e-12	Laccase-7 [UniProtKB/Swiss-Prot:Q5N7B4]	Os01g0850700	AT2G38080
TraesCS1B02G347400	0.570141	2.37921e-07	Dof zinc finger protein 5 [UniProtKB/Swiss-Prot:Q5JLR7]	Os05g0440000	NA
TraesCS7A02G339600	0.570105	8.78969e-06	Peroxidase 1 [UniProtKB/Swiss-Prot:A5H8G4]	Os01g0327100	NA
TraesCS3A02G173000	0.570006	1.4596e-19	Phospholipase A1 PLIP2, chloroplastic [UniProtKB/Swiss-Prot:F4HXL0]	Os01g0253900	NA
TraesCS5D02G408500	0.570005	3.41531e-10	Probable protein phosphatase 2C 34 [UniProtKB/Swiss-Prot:Q94H98]	Os03g0761100	AT4G33920
TraesCS4A02G236800	0.569995	1.51617e-14	NA	Os03g0607500	AT2G14910
TraesCS1D02G256800	0.569759	1.3615e-05	Probable carboxylesterase 17 [UniProtKB/Swiss-Prot:Q9LFR7]	Os05g0410200	NA
TraesCS4A02G062300	0.569475	0.000129332	Peroxisomal nicotinamide adenine dinucleotide carrier [UniProtKB/Swiss-Prot:O04200]	Os02g0225000	AT2G39970
TraesCS2A02G224000	0.568912	9.17478e-16	Autophagy-related protein 8A [UniProtKB/Swiss-Prot:Q69RC4]	Os07g0512200	AT1G62040
TraesCS6A02G363900	0.568535	9.52228e-11	Probable protein phosphatase 2C 27 [UniProtKB/Swiss-Prot:Q69QZ0]	Os02g0799000	AT2G25620
TraesCS2B02G439900	0.568078	1.79338e-11	Lecithin-cholesterol acyltransferase-like 4 [UniProtKB/Swiss-Prot:Q71N54]	Os04g0615100	AT4G19860
TraesCS6A02G392700	0.568002	4.14635e-11	Probable voltage-gated potassium channel subunit beta [UniProtKB/Swiss-Prot:Q40648]	Os02g0817500	AT1G04690
TraesCS6B02G371800	0.56777	3.02868e-08	NA	Os02g0781700	NA
TraesCS3B02G477100	0.567207	3.40958e-10	Long chain base biosynthesis protein 2d [UniProtKB/Swiss-Prot:Q5JK39]	Os01g0928800	AT5G23670
TraesCS3B02G296100	0.566673	3.64303e-09	Zinc finger protein BRUTUS [UniProtKB/Swiss-Prot:Q8LPQ5]	Os01g0689451	AT3G18290
TraesCS2D02G417800	0.566645	8.02362e-14	Lecithin-cholesterol acyltransferase-like 4 [UniProtKB/Swiss-Prot:Q71N54]	Os04g0615100	AT4G19860
TraesCS2A02G310900	0.56631	0.00434026	NA	NA	NA
TraesCS6D02G106000	0.566209	0.000134846	NA	Os07g0213500	AT3G57062
TraesCS2D02G356400	0.565979	8.76549e-12	Protein LAZ1 homolog 1 [UniProtKB/Swiss-Prot:Q94CA0]	Os07g0506000	AT4G21570
TraesCS2A02G559200	0.5658	3.38944e-13	Putative 1-phosphatidylinositol-3-phosphate 5-kinase FAB1C [UniProtKB/Swiss-Prot:Q9SSJ8]	Os04g0691900	NA
TraesCS6B02G229700	0.56569	0.00130548	Ethylene-responsive transcription factor-like protein At4g13040 [UniProtKB/Swiss-Prot:Q56XP9]	Os02g0499000	NA
TraesCS7A02G392800	0.565667	0.000346667	Tryptophan synthase beta chain 2 [UniProtKB/Swiss-Prot:O67409]	Os06g0632200	AT5G38530
TraesCS6B02G423500	0.565345	1.68554e-06	F-box protein PP2-B10 [UniProtKB/Swiss-Prot:Q9ZVQ6]	Os02g0813350	NA
TraesCS4B02G243200	0.564551	6.77261e-06	Superoxide dismutase [Cu-Zn] 2 [UniProtKB/Swiss-Prot:O49044]	Os03g0219200	AT5G18100
TraesCS1D02G001600	0.564352	4.95922e-15	L-gulonolactone oxidase 2 [UniProtKB/Swiss-Prot:Q6NQ66]	Os08g0114300	AT5G56470
TraesCS2B02G417200	0.56429	1.12991e-07	SPX domain-containing membrane protein Os04g0573000 [UniProtKB/Swiss-Prot:Q0JAW2]	Os04g0573000	AT1G63010
TraesCS1A02G317000	0.564246	0.000158562	Uncharacterized protein At5g41620 [UniProtKB/Swiss-Prot:Q66GQ2]	Os05g0498500	AT3G20350
TraesCS5A02G375000	0.564221	2.95377e-16	Ornithine aminotransferase, mitochondrial [UniProtKB/Swiss-Prot:Q10G56]	Os03g0643300	AT5G46180
TraesCS2B02G546500	0.564069	0.000617032	Haloalkane dehalogenase 2 [UniProtKB/Swiss-Prot:P9WMS1]	Os04g0644600	AT1G52510
TraesCS6A02G358100	0.563609	5.5495e-21	Photosystem II 10 kDa polypeptide, chloroplastic [UniProtKB/Swiss-Prot:P06183]	Os08g0200300	AT1G79040
TraesCS6B02G324400	0.563474	7.57459e-09	ADP-ribosylation factor-like protein 8c [UniProtKB/Swiss-Prot:Q8W4C8]	Os02g0732500	AT5G37680
TraesCS1B02G036500	0.563363	0.00151807	CSC1-like protein At3g21620 [UniProtKB/Swiss-Prot:Q9LVE4]	Os05g0594700	AT3G21620
TraesCS6A02G336500	0.563114	4.1993e-09	Protein OPAQUE1 [UniProtKB/Swiss-Prot:K7U9N8]	Os02g0777700	AT4G33200
TraesCS1D02G098000	0.562887	1.34228e-15	1-aminocyclopropane-1-carboxylate oxidase [UniProtKB/Swiss-Prot:Q9FR99]	Os05g0149400	AT1G77330
TraesCS5A02G302900	0.56263	1.16682e-17	Glutathione S-transferase [UniProtKB/Swiss-Prot:O04437]	Os12g0210300	AT2G02380
TraesCS5D02G433100	0.562135	0.000913494	Ethylene-responsive transcription factor CRF4 [UniProtKB/Swiss-Prot:Q9SUE3]	NA	NA
TraesCS5D02G279000	0.561585	7.38119e-08	Protein Iojap, chloroplastic [UniProtKB/Swiss-Prot:Q41822]	Os09g0493600	NA
TraesCS4D02G069300	0.561489	2.04193e-05	Type IV inositol polyphosphate 5-phosphatase 11 [UniProtKB/Swiss-Prot:Q5EAF2]	Os03g0626500	AT1G47510
TraesCS3A02G219800	0.561467	3.65653e-06	GDSL esterase/lipase At2g27360 [UniProtKB/Swiss-Prot:Q9ZQI3]	Os01g0612900	NA
TraesCS4A02G105500	0.561339	0.000258975	Thioredoxin-like protein AAED1, chloroplastic [UniProtKB/Swiss-Prot:Q9ZUU2]	Os03g0284600	AT2G37240
TraesCS2A02G398000	0.560966	0.00199444	Guard cell S-type anion channel SLAC1 [UniProtKB/Swiss-Prot:Q9LD83]	Os04g0574700	AT1G12480
TraesCS3B02G462700	0.560596	0.00115183	NA	Os01g0919600	NA
TraesCS1B02G080400	0.56052	4.22374e-07	UDP-glycosyltransferase 86A1 [UniProtKB/Swiss-Prot:Q9SJL0]	Os10g0442400	AT2G36970
TraesCS1A02G361600	0.560388	1.61927e-05	Histone H2B.2 [UniProtKB/Swiss-Prot:P05621]	Os05g0460475	AT1G07790
TraesCS5B02G182500	0.559642	2.0214e-11	Putative glucose-6-phosphate 1-epimerase [UniProtKB/Swiss-Prot:Q40784]	Os09g0327400	AT5G66530
TraesCS2B02G099500	0.559417	0.00105261	Omega-3 fatty acid desaturase, chloroplastic [UniProtKB/Swiss-Prot:P48619]	Os07g0693800	AT5G05580
TraesCS2D02G202700	0.559237	1.25531e-08	NA	Os07g0573800	AT3G03890
TraesCS7A02G133500	0.559118	3.97578e-11	Pullulanase 1, chloroplastic [UniProtKB/Swiss-Prot:Q8GTR4]	Os04g0164900	AT5G04360
TraesCS6B02G415800	0.559001	0.000750929	Diphthine--ammonia ligase [UniProtKB/Swiss-Prot:Q9USQ7]	Os02g0810450	AT3G04480
TraesCS4A02G396700	0.558819	0.00662561	Mitogen-activated protein kinase kinase 2 [UniProtKB/Swiss-Prot:Q9S7U9]	Os06g0147800	AT4G29810
TraesCS4D02G135000	0.558796	1.42992e-18	Ribulose bisphosphate carboxylase/oxygenase activase A, chloroplastic [UniProtKB/Swiss-Prot:Q40073]	Os11g0707000	AT2G39730
TraesCS4A02G130400	0.558796	2.29982e-15	Thioredoxin-like 1-2, chloroplastic [UniProtKB/Swiss-Prot:Q10M18]	Os03g0326500	AT1G08570
TraesCS1D02G119700	0.558766	1.29393e-06	E3 ubiquitin-protein ligase At4g11680 [UniProtKB/Swiss-Prot:Q93Z92]	Os05g0179000	AT4G32600
TraesCS1D02G392300	0.558355	4.35904e-08	NA	Os05g0556000	AT4G13400
TraesCS7B02G483100	0.558037	4.88184e-05	Putative 4-hydroxy-4-methyl-2-oxoglutarate aldolase 3 [UniProtKB/Swiss-Prot:Q9FH13]	Os02g0761900	AT5G16450
TraesCS5D02G242400	0.558034	0.00104211	Beta-1,3-galactosyltransferase 7 [UniProtKB/Swiss-Prot:Q6NQB7]	Os09g0452900	AT1G77810
TraesCS7D02G235700	0.55788	1.45127e-05	Beta-1,2-xylosyltransferease XAX1 [UniProtKB/Swiss-Prot:Q6Z7I3]	Os06g0470000	NA
TraesCS6D02G128900	0.557872	1.78373e-11	Thiosulfate/3-mercaptopyruvate sulfurtransferase 1, mitochondrial [UniProtKB/Swiss-Prot:O64530]	Os02g0167100	AT1G79230
TraesCS1B02G113800	0.557641	0.000756313	Probable glutathione S-transferase GSTF1 [UniProtKB/Swiss-Prot:O65857]	Os05g0148900	NA
TraesCS2D02G136600	0.557367	0.00311417	CTL-like protein DDB_G0274487 [UniProtKB/Swiss-Prot:Q869R1]	Os07g0656100	AT5G13760
TraesCS5A02G147500	0.557336	4.33459e-13	Probable serine/threonine-protein kinase WNK8 [UniProtKB/Swiss-Prot:Q2QYL8]	Os11g0114600	AT5G01850
TraesCS5A02G403800	0.556946	0.000142139	CASP-like protein 5C1 [UniProtKB/Swiss-Prot:Q10EJ2]	Os03g0767900	AT4G37235
TraesCS1B02G046300	0.556728	3.31431e-05	ACT domain-containing protein ACR9 [UniProtKB/Swiss-Prot:O80644]	Os05g0113000	AT2G39570
TraesCS1D02G107000	0.55638	1.96381e-08	Peroxisomal membrane protein 2 [UniProtKB/Swiss-Prot:Q2KIY1]	Os03g0583800	AT1G52870
TraesCS1B02G384500	0.556244	8.07236e-12	Phosphatidylinositol/phosphatidylcholine transfer protein SFH8 [UniProtKB/Swiss-Prot:F4IHJ0]	Os05g0545000	AT2G21520
TraesCS3B02G144400	0.556179	0.00390715	UDP-glycosyltransferase 73C3 [UniProtKB/Swiss-Prot:Q9ZQ96]	Os01g0176200	NA
TraesCS3A02G240500	0.556033	6.01386e-12	Iron-sulfur cluster assembly protein 1 [UniProtKB/Swiss-Prot:Q8LR34]	Os01g0662600	AT4G22220
TraesCS4B02G133400	0.55576	1.30738e-08	Ubiquitin-like protein 5 [UniProtKB/Swiss-Prot:Q9FGZ9]	Os11g0145400	AT5G42300
TraesCS1A02G141900	0.55494	0.00572197	E3 ubiquitin-protein ligase AIRP2 [UniProtKB/Swiss-Prot:Q9M022]	Os10g0445400	AT5G01520
TraesCS5A02G370700	0.553796	1.68674e-10	Myosin-binding protein 7 [UniProtKB/Swiss-Prot:Q9FG14]	Os03g0650800	NA
TraesCS4D02G054300	0.553713	0.00166736	Iron-sulfur assembly protein IscA-like 1, mitochondrial [UniProtKB/Swiss-Prot:Q8LBM4]	Os12g0485500	AT2G36260
TraesCS4A02G112800	0.553704	1.17715e-05	Gamma-interferon-responsive lysosomal thiol protein [UniProtKB/Swiss-Prot:Q9SV73]	Os03g0295800	AT1G07080
TraesCS3B02G340400	0.553611	8.14899e-05	F-box protein At5g46170 [UniProtKB/Swiss-Prot:Q9FNK5]	Os01g0770400	AT5G46170
TraesCS2D02G236500	0.553467	2.95171e-10	Zeta-carotene desaturase, chloroplastic/chromoplastic [UniProtKB/Swiss-Prot:Q9ZTP4]	Os07g0204900	AT3G04870
TraesCS1D02G372200	0.553168	2.2915e-12	Phosphatidylinositol/phosphatidylcholine transfer protein SFH8 [UniProtKB/Swiss-Prot:F4IHJ0]	Os05g0545000	AT2G21520
TraesCS6A02G281000	0.552943	8.59146e-13	NA	Os02g0717500	AT5G48020
TraesCS6D02G150000	0.552685	0.00108939	NA	Os02g0199600	NA
TraesCS1D02G265400	0.552284	3.07328e-05	Bidirectional sugar transporter SWEET1b [UniProtKB/Swiss-Prot:Q60EC2]	Os05g0426000	AT1G21460
TraesCS4A02G267500	0.552144	7.72916e-09	Ubiquitin-conjugating enzyme E2 variant 1A [UniProtKB/Swiss-Prot:Q93YP0]	Os03g0712300	AT1G23260
TraesCS7A02G547500	0.552015	1.11769e-14	ATP-dependent zinc metalloprotease FTSH 1, chloroplastic [UniProtKB/Swiss-Prot:Q5Z974]	Os06g0725900	AT1G50250
TraesCS3B02G317400	0.551956	0.00149975	NA	Os01g0727600	NA
TraesCS7A02G385600	0.55168	1.10885e-13	NA	NA	NA
TraesCS5A02G488500	0.551418	6.50673e-10	GEM-like protein 5 [UniProtKB/Swiss-Prot:Q9LYV6]	Os12g0478200	AT5G13200
TraesCS5B02G224900	0.551365	0.00608042	Protein SRG1 [UniProtKB/Swiss-Prot:Q39224]	Os02g0280700	NA
TraesCS2B02G171300	0.551282	0.000451035	Plastid-lipid-associated protein 6, chloroplastic [UniProtKB/Swiss-Prot:Q9LW57]	Os11g0595200	AT3G23400
TraesCS2D02G366300	0.551073	5.3448e-14	Remorin [UniProtKB/Swiss-Prot:P93788]	Os04g0533300	AT3G61260
TraesCS2A02G352400	0.550988	1.01672e-07	Protein NLP2 [UniProtKB/Swiss-Prot:Q0JC27]	Os04g0495800	NA
TraesCS4D02G174700	0.550986	3.66443e-06	2,3-bisphosphoglycerate-independent phosphoglycerate mutase [UniProtKB/Swiss-Prot:P35493]	Os03g0330200	AT3G08590
TraesCS3D02G467600	0.550954	7.58279e-07	Chitinase CLP [UniProtKB/Swiss-Prot:Q8S1V1]	Os01g0937100	NA
TraesCS4D02G211300	0.550734	1.1235e-13	Serine/threonine-protein kinase ATG1c [UniProtKB/Swiss-Prot:F4IRW0]	Os03g0268200	AT2G28940
TraesCS1A02G253000	0.550251	0.0055289	Methyl-CpG-binding domain-containing protein 1 [UniProtKB/Swiss-Prot:Q5XEN5]	Os05g0404600	NA
TraesCS1D02G067900	0.55008	2.22442e-11	Protein SEEDLING PLASTID DEVELOPMENT 1 [UniProtKB/Swiss-Prot:F4J3R7]	Os07g0187400	AT3G10420
TraesCS4D02G237800	0.549957	3.52942e-05	Heptahelical transmembrane protein ADIPOR3 [UniProtKB/Swiss-Prot:Q10PI5]	Os03g0232900	AT4G37680
TraesCS1D02G144800	0.549843	2.52809e-07	Bifunctional riboflavin kinase/FMN phosphatase [UniProtKB/Swiss-Prot:Q84MD8]	Os10g0464400	AT4G21470
TraesCS7D02G206500	0.549762	1.64081e-08	1-aminocyclopropane-1-carboxylate oxidase homolog 11 [UniProtKB/Swiss-Prot:Q9LTH8]	Os06g0255100	NA
TraesCS4A02G319000	0.549503	1.2059e-11	PGR5-like protein 1A, chloroplastic [UniProtKB/Swiss-Prot:Q8H112]	Os03g0857400	AT4G22890
TraesCS3B02G448000	0.549307	0.00204296	BTB/POZ and TAZ domain-containing protein 2 [UniProtKB/Swiss-Prot:Q94BN0]	Os01g0908200	NA
TraesCS7D02G166300	0.549178	2.05975e-12	Choline/ethanolaminephosphotransferase 1 [UniProtKB/Swiss-Prot:O82567]	Os06g0204400	AT1G13560
TraesCS2A02G342700	0.548991	0.000252669	Short-chain dehydrogenase PC-15 [UniProtKB/Swiss-Prot:A0A0E3D8L9]	Os04g0457200	AT5G65205
TraesCS4A02G382700	0.548939	0.0035831	U-box domain-containing protein 52 [UniProtKB/Swiss-Prot:Q9FKG6]	Os06g0140800	NA
TraesCS5B02G268800	0.548869	0.00035066	Cinnamoyl-CoA reductase 1 [UniProtKB/Swiss-Prot:Q6K9A2]	Os09g0491820	AT1G76470
TraesCS3A02G146300	0.548855	0.00487312	NA	Os01g0221400	AT5G41761
TraesCS3A02G506200	0.548784	1.37664e-08	Chlorophyllide a oxygenase, chloroplastic [UniProtKB/Swiss-Prot:Q8S7E1]	Os10g0567400	AT1G44446
TraesCS4B02G269300	0.548518	4.58811e-07	NA	Os03g0152600	AT2G36895
TraesCS6B02G343300	0.548424	3.45791e-10	Presequence protease 1, chloroplastic/mitochondrial [UniProtKB/Swiss-Prot:Q9LJL3]	Os02g0761400	AT3G19170
TraesCS4D02G275900	0.54805	2.07752e-06	NA	Os03g0161500	AT4G14746
TraesCS3D02G343900	0.547903	3.16734e-10	Internal alternative NAD(P)H-ubiquinone oxidoreductase A1, mitochondrial [UniProtKB/Swiss-Prot:Q8GWA1]	Os01g0830100	AT1G07180
TraesCS2B02G369600	0.547821	0.00287578	Haloacid dehalogenase-like hydrolase domain-containing protein At4g39970 [UniProtKB/Swiss-Prot:Q680K2]	Os08g0485900	AT4G39970
TraesCS4A02G303400	0.547747	0.000748478	Uncharacterized oxidoreductase At1g06690, chloroplastic [UniProtKB/Swiss-Prot:Q94A68]	Os09g0567366	AT2G27680
TraesCS1A02G263300	0.547675	4.12781e-09	Cytochrome c [UniProtKB/Swiss-Prot:P00068]	Os05g0420600	AT1G22840
TraesCS2A02G158800	0.546781	6.28957e-10	Subtilisin-chymotrypsin inhibitor-2B (Fragment) [UniProtKB/Swiss-Prot:P08626]	Os01g0615050	NA
TraesCS3D02G244500	0.546219	0.00103466	Ras-related protein RABA1f [UniProtKB/Swiss-Prot:Q9FJH0]	Os01g0667600	AT1G28550
TraesCS6D02G371600	0.546049	0.000872204	FT-interacting protein 3 [UniProtKB/Swiss-Prot:Q9M2R0]	Os02g0816000	AT3G57880
TraesCS3A02G249400	0.54596	4.01659e-05	NA	Os01g0712600	AT4G29590
TraesCS5B02G531400	0.54585	5.48351e-11	Late embryogenesis abundant protein Lea14-A [UniProtKB/Swiss-Prot:P46518]	Os03g0843300	AT2G44060
TraesCS2D02G228500	0.545735	8.76e-05	NA	Os07g0516300	AT1G61930
TraesCS6D02G130800	0.54555	1.58947e-20	4-hydroxyphenylpyruvate dioxygenase [UniProtKB/Swiss-Prot:O48604]	Os02g0168100	AT1G06570
TraesCS1A02G257400	0.545205	0.000171384	Protein NRT1/ PTR FAMILY 3.1 [UniProtKB/Swiss-Prot:Q9SX20]	Os05g0410500	AT1G68570
TraesCS7A02G306100	0.545156	0.00539629	Transcription factor KUA1 [UniProtKB/Swiss-Prot:Q9LVS0]	Os08g0144000	NA
TraesCS6B02G185700	0.54513	0.00645098	Nuclear transcription factor Y subunit C-4 [UniProtKB/Swiss-Prot:Q655V5]	Os02g0170500	AT1G56170
TraesCS5D02G413300	0.545059	7.86017e-08	Thioredoxin-like protein HCF164, chloroplastic [UniProtKB/Swiss-Prot:Q7Y0D4]	Os03g0767500	AT4G37200
TraesCS6B02G096400	0.545028	0.00280742	Serine/threonine-protein kinase STY46 [UniProtKB/Swiss-Prot:F4JTP5]	Os02g0120100	AT2G16750
TraesCS1D02G274800	0.544778	1.38898e-09	NA	Os05g0440100	AT5G06370
TraesCS2D02G235600	0.544541	1.81708e-07	Uncharacterized Rho GTPase-activating protein At5g61530 [UniProtKB/Swiss-Prot:Q3E875]	Os07g0486500	AT5G61530
TraesCS6D02G183500	0.54452	1.00682e-07	Putative elongation factor TypA-like SVR3, chloroplastic [UniProtKB/Swiss-Prot:F4K410]	Os02g0285800	AT5G13650
TraesCS1A02G135700	0.544249	9.52189e-05	Ferrochelatase-2, chloroplastic [UniProtKB/Swiss-Prot:A2Y3Q5]	Os05g0361200	AT2G30390
TraesCS4D02G162000	0.544128	1.507e-12	Probable glutathione peroxidase 4 [UniProtKB/Swiss-Prot:Q8L910]	Os03g0358100	AT2G48150
TraesCS7D02G092800	0.543767	4.92676e-07	Iron-sulfur assembly protein IscA, chloroplastic [UniProtKB/Swiss-Prot:Q9XIK3]	Os06g0146400	AT1G10500
TraesCS3D02G091300	0.54357	1.05704e-05	SH3 domain-containing protein PJ696.02 [UniProtKB/Swiss-Prot:Q9URW6]	Os07g0272400	AT3G43230
TraesCS2D02G085800	0.54349	0.000477765	Isoflavone reductase homolog [UniProtKB/Swiss-Prot:P52581]	Os12g0265100	AT1G32100
TraesCS5B02G233700	0.542861	0.00229073	Beta-1,3-galactosyltransferase 7 [UniProtKB/Swiss-Prot:Q6NQB7]	Os09g0452900	AT1G77810
TraesCS7A02G277600	0.542669	1.7433e-11	Monodehydroascorbate reductase 4, cytosolic [UniProtKB/Swiss-Prot:Q6ZJ08]	Os08g0557600	AT5G03630
TraesCS5B02G061600	0.542526	2.50738e-05	11-beta-hydroxysteroid dehydrogenase A [UniProtKB/Swiss-Prot:A7LB60]	Os11g0499600	NA
TraesCS1A02G062100	0.542474	3.97904e-11	Tetraspanin-3 [UniProtKB/Swiss-Prot:Q9M1E7]	Os05g0122800	AT3G45600
TraesCS3B02G286300	0.54244	1.43266e-09	Farnesyl pyrophosphate synthase [UniProtKB/Swiss-Prot:P49353]	Os01g0703400	AT4G17190
TraesCS6B02G384500	0.542154	1.50692e-17	Probable alpha,alpha-trehalose-phosphate synthase [UDP-forming] 11 [UniProtKB/Swiss-Prot:Q9ZV48]	Os02g0790500	AT2G18700
TraesCS3A02G082700	0.542086	0.0035135	Probable inactive shikimate kinase like 1, chloroplastic [UniProtKB/Swiss-Prot:Q9LW20]	Os01g0102600	NA
TraesCS2D02G370400	0.542035	1.85829e-09	ABC transporter G family member 11 [UniProtKB/Swiss-Prot:Q8RXN0]	Os04g0528300	AT1G17840
TraesCS3A02G365000	0.541747	0.000124814	Phosphatidylinositol:ceramide inositolphosphotransferase [UniProtKB/Swiss-Prot:Q5N7A7]	Os01g0850100	AT2G37940
TraesCS7A02G272200	0.541297	1.82358e-08	Probable L-ascorbate peroxidase 4, peroxisomal [UniProtKB/Swiss-Prot:Q6ZJJ1]	Os08g0549100	AT4G35970
TraesCS6B02G161600	0.540627	9.307e-12	NADPH-dependent alkenal/one oxidoreductase, chloroplastic [UniProtKB/Swiss-Prot:Q9ZUC1]	Os08g0379400	AT1G23740
TraesCS2B02G132700	0.540497	0.00571903	UDP-glucosyltransferase 29 [UniProtKB/Swiss-Prot:A0A0A6ZFY4]	Os07g0672700	NA
TraesCS2B02G094100	0.540394	0.000225205	U-box domain-containing protein 33 [UniProtKB/Swiss-Prot:Q8GUH1]	Os07g0686800	NA
TraesCS5D02G186100	0.540275	0.00225941	Ubiquitin-conjugating enzyme E2 36 [UniProtKB/Swiss-Prot:Q9FZ48]	Os09g0293400	AT1G78870
TraesCS7A02G106000	0.540079	0.000454726	Anthranilate N-benzoyltransferase protein 1 [UniProtKB/Swiss-Prot:O24645]	Os06g0151100	NA
TraesCS7B02G116800	0.539947	7.16871e-21	Aldehyde dehydrogenase family 2 member B4, mitochondrial [UniProtKB/Swiss-Prot:Q9SU63]	Os06g0270900	AT1G23800
TraesCS6B02G209400	0.539558	0.000756758	NA	Os02g0203500	NA
TraesCS1B02G230500	0.539552	1.23708e-09	Peptide methionine sulfoxide reductase A4, chloroplastic [UniProtKB/Swiss-Prot:Q336R9]	Os10g0563600	AT5G61640
TraesCS1A02G340400	0.53816	6.50098e-05	Dolichyl-diphosphooligosaccharide--protein glycosyltransferase subunit STT3A [UniProtKB/Swiss-Prot:Q6F2Z1]	Os05g0519900	AT5G19690
TraesCS2B02G305900	0.538136	0.00407744	Potassium transporter 1 [UniProtKB/Swiss-Prot:Q6VVA6]	Os04g0401700	AT4G13420
TraesCS6A02G232400	0.537959	7.21189e-11	Bifunctional nitrilase/nitrile hydratase NIT4 [UniProtKB/Swiss-Prot:Q6H849]	Os02g0635000	AT5G22300
TraesCS3B02G485600	0.537917	0.000126707	Heparan-alpha-glucosaminide N-acetyltransferase [UniProtKB/Swiss-Prot:Q3UDW8]	Os01g0931100	AT5G27730
TraesCS7D02G512800	0.537756	2.74086e-19	Cytochrome P450 72A14 [UniProtKB/Swiss-Prot:Q9LUC6]	Os01g0628900	NA
TraesCS2D02G443400	0.537685	0.000105884	Protein AE7 [UniProtKB/Swiss-Prot:Q9C9G6]	Os04g0596400	AT1G68310
TraesCS5A02G001500	0.537463	1.31552e-12	Carotenoid 9,10(9',10')-cleavage dioxygenase [UniProtKB/Swiss-Prot:Q84KG5]	Os12g0640600	AT3G63520
TraesCS5B02G454800	0.537346	0.00106195	NA	NA	NA
TraesCS2D02G157800	0.537095	1.19703e-05	Cytochrome P450 709B2 [UniProtKB/Swiss-Prot:F4IK45]	Os07g0635500	NA
TraesCS5A02G514800	0.536952	0.000179057	NA	Os03g0123800	NA
TraesCS1B02G459800	0.53673	2.46092e-07	Probable GABA transporter 2 [UniProtKB/Swiss-Prot:Q8L4X4]	Os05g0586500	AT5G41800
TraesCS2A02G132600	0.536632	0.00114037	Xylan glycosyltransferase MUCI21 [UniProtKB/Swiss-Prot:Q9SS43]	Os07g0657400	NA
TraesCS3A02G425500	0.53654	2.26483e-05	Sucrose-phosphate synthase [UniProtKB/Swiss-Prot:P31927]	Os01g0919400	AT1G04920
TraesCS5A02G292100	0.535854	4.40179e-14	Caffeoylshikimate esterase [UniProtKB/Swiss-Prot:Q9C942]	Os10g0135600	AT5G16120
TraesCS6D02G274300	0.535071	2.82857e-07	NA	Os10g0181600	NA
TraesCS3A02G368800	0.535021	1.28405e-08	Nematode resistance protein-like HSPRO1 [UniProtKB/Swiss-Prot:Q9LY61]	Os01g0855600	AT3G55840
TraesCS6B02G299800	0.534998	2.72876e-05	Soluble inorganic pyrophosphatase [UniProtKB/Swiss-Prot:Q0DYB1]	Os02g0704900	AT2G18230
TraesCS5B02G462600	0.534947	0.000101486	NA	Os03g0411300	AT2G44310
TraesCS4D02G050100	0.534632	1.05888e-08	26S proteasome non-ATPase regulatory subunit 8 homolog A [UniProtKB/Swiss-Prot:Q9SGW3]	Os07g0435100	AT1G64520
TraesCS4B02G047200	0.534289	0.000867743	NA	Os01g0299400	NA
TraesCS1D02G089400	0.534288	1.12069e-08	Probable E3 ubiquitin-protein ligase XBOS34 [UniProtKB/Swiss-Prot:Q7XI08]	Os07g0446100	NA
TraesCS3D02G328300	0.534062	1.5899e-10	Calmodulin-related protein [UniProtKB/Swiss-Prot:P27164]	Os05g0491100	AT3G56800
TraesCS2D02G340800	0.53302	0.0027332	NA	Os04g0482900	AT5G40500
TraesCS5A02G512400	0.532974	4.66256e-08	NA	Os03g0142900	AT3G04350
TraesCS3B02G233000	0.532912	1.0081e-06	Vacuolar-processing enzyme [UniProtKB/Swiss-Prot:P49043]	Os01g0559600	AT4G32940
TraesCS7D02G135800	0.532796	0.00193799	Sulfiredoxin, chloroplastic/mitochondrial [UniProtKB/Swiss-Prot:Q8GY89]	Os06g0174300	AT1G31170
TraesCS5B02G502200	0.532578	1.21894e-13	GEM-like protein 5 [UniProtKB/Swiss-Prot:Q9LYV6]	Os12g0478200	AT5G13200
TraesCS4A02G177500	0.532192	1.01349e-19	Ribulose bisphosphate carboxylase/oxygenase activase A, chloroplastic [UniProtKB/Swiss-Prot:Q40073]	Os11g0707000	AT2G39730
TraesCS2D02G399400	0.532169	1.40864e-05	WD repeat-containing protein 44 [UniProtKB/Swiss-Prot:Q9XSC3]	Os04g0568400	NA
TraesCS5A02G312700	0.531925	0.000715049	F-box protein PP2-A13 [UniProtKB/Swiss-Prot:Q9LEX0]	Os09g0525300	AT5G52120
TraesCS4A02G257700	0.531261	1.34487e-07	Inositol-tetrakisphosphate 1-kinase 3 [UniProtKB/Swiss-Prot:Q75GI4]	Os03g0726200	AT4G08170
TraesCS1D02G076200	0.531187	1.43545e-10	Cysteine-rich receptor-like protein kinase 42 [UniProtKB/Swiss-Prot:Q9FNE1]	Os05g0130100	NA
TraesCS4A02G274700	0.531125	1.74881e-06	NA	Os03g0701600	NA
TraesCS7A02G464100	0.531031	0.000859614	NAC domain-containing protein 21/22 [UniProtKB/Swiss-Prot:Q84TE6]	Os06g0675600	NA
TraesCS4B02G072200	0.531019	2.23537e-08	Protein JINGUBANG [UniProtKB/Swiss-Prot:O48716]	Os12g0594000	NA
TraesCS3A02G333100	0.530867	1.1702e-11	Stomatal closure-related actin-binding protein 1 [UniProtKB/Swiss-Prot:O48791]	Os01g0805700	AT2G26770
TraesCS6A02G339600	0.530676	6.61388e-08	Ribonuclease 1 [UniProtKB/Swiss-Prot:P42813]	Os08g0434100	AT2G02990
TraesCS7D02G259900	0.530045	1.89691e-09	NA	Os08g0529300	NA
TraesCS1A02G170600	0.530029	1.56765e-05	Bifunctional epoxide hydrolase 2 [UniProtKB/Swiss-Prot:P80299]	Os10g0498200	NA
TraesCS2B02G363800	0.529779	3.62834e-10	Uncharacterized membrane protein YuiD [UniProtKB/Swiss-Prot:O32107]	Os04g0486900	AT1G67600
TraesCS1D02G396300	0.529354	0.000427892	Probable ubiquitin-conjugating enzyme E2 24 [UniProtKB/Swiss-Prot:Q8VY10]	Os05g0557700	NA
TraesCS2B02G257100	0.529323	1.61868e-05	Uncharacterized Rho GTPase-activating protein At5g61530 [UniProtKB/Swiss-Prot:Q3E875]	Os07g0486500	AT5G61530
TraesCS5B02G146100	0.528621	5.97148e-07	Probable serine/threonine-protein kinase WNK8 [UniProtKB/Swiss-Prot:Q2QYL8]	Os12g0114100	AT5G01850
TraesCS4B02G311100	0.528569	2.52405e-15	Pheophorbide a oxygenase, chloroplastic [UniProtKB/Swiss-Prot:Q0DV66]	Os03g0146400	AT3G44880
TraesCS5A02G497400	0.528028	3.27033e-09	Hypersensitive-induced response protein 1 [UniProtKB/Swiss-Prot:Q6ZIV7]	Os08g0398400	AT5G62740
TraesCS3A02G147900	0.528008	0.00035576	NA	Os01g0221500	AT2G46220
TraesCS6D02G204300	0.527679	2.90041e-06	F-box/LRR-repeat protein 14 [UniProtKB/Swiss-Prot:Q8N1E6]	Os02g0613200	AT1G15740
TraesCS4B02G062800	0.527675	9.5824e-10	4-hydroxy-3-methylbut-2-enyl diphosphate reductase, chloroplastic [UniProtKB/Swiss-Prot:Q6AVG6]	Os03g0731900	AT4G34350
TraesCS2D02G331800	0.527097	1.42371e-08	Amino acid permease 2 [UniProtKB/Swiss-Prot:Q38967]	Os04g0470700	AT5G23810
TraesCS6A02G132400	0.526685	0.00449712	L-type lectin-domain containing receptor kinase SIT2 [UniProtKB/Swiss-Prot:Q7XUN6]	Os02g0165100	NA
TraesCS2B02G309800	0.526546	1.35904e-11	Neutral/alkaline invertase 3, chloroplastic [UniProtKB/Swiss-Prot:Q6H6N5]	Os04g0409900	AT5G22510
TraesCS2B02G571700	0.52632	0.000708068	Ubiquinol oxidase 4, chloroplastic/chromoplastic [UniProtKB/Swiss-Prot:Q56X52]	Os04g0668900	AT4G22260
[truncated: 3,973 more rows]

## Sheet: Supplementary Data 3
Supplementary Data 3. 30178 DEGs generated from Drought conditions (WT) vs Normal conditions (WT).
Gene ID	log2FC(dWT vs nWT)	P value(dWT vs nWT)
TraesCS3B02G183600	1.00002	4.18699e-07
TraesCS6A02G390800	1.00006	5.95928e-22
TraesCS5D02G394200	1.00011	1.99545e-07
TraesCS2D02G198100	1.00016	5.2092e-26
TraesCS6B02G195300	1.00024	2.11826e-07
TraesCS1B02G132900	1.00031	4.20423e-09
TraesCS6B02G279200	1.00031	8.21706e-30
TraesCS1A02G130700	1.00036	2.42196e-07
TraesCS1D02G262200	1.00054	4.84149e-13
TraesCS5B02G243700	1.00063	7.0979e-17
TraesCS4A02G252800	1.00103	2.01366e-18
TraesCS1A02G304300	1.00115	4.13198e-06
TraesCS4A02G411600	1.00124	1.59656e-13
TraesCS6A02G165600	1.00133	1.24679e-24
TraesCS3A02G425600	1.00137	6.98217e-10
TraesCS1D02G245300	1.00166	1.01516e-20
TraesCS4A02G052700	1.00184	3.96745e-17
TraesCS2D02G255300	1.00215	4.81758e-09
TraesCS7D02G476000	1.00215	1.10329e-18
TraesCS4B02G305200	1.00223	3.04027e-05
TraesCS6D02G281700	1.00227	3.16548e-17
TraesCS2B02G494700	1.00227	2.78327e-06
TraesCS6A02G405400	1.00246	2.23258e-19
TraesCS7D02G250300	1.00266	9.44751e-31
TraesCS2A02G401600	1.00272	0.00179837
TraesCS3B02G419900	1.00318	1.16364e-13
TraesCS5B02G255400	1.00335	0.00102988
TraesCS6A02G069400	1.00355	0.000185018
TraesCS7A02G332700	1.0037	5.098e-13
TraesCS2A02G415300	1.00379	0.00948352
TraesCS1A02G095500	1.00402	7.56203e-16
TraesCS4A02G267500	1.00409	2.69952e-23
TraesCS7D02G294800	1.00447	2.31322e-23
TraesCS1A02G240300	1.0045	0.000667187
TraesCS2B02G255100	1.00452	6.33372e-11
TraesCS1B02G215200	1.00475	1.34712e-21
TraesCS2A02G224200	1.0048	2.14118e-24
TraesCS6D02G393300	1.00481	2.03746e-10
TraesCS6A02G410200	1.00482	7.86337e-06
TraesCS4B02G042900	1.00482	3.36444e-15
TraesCS5A02G203700	1.00492	0.00444284
TraesCS6D02G084800	1.00493	2.96411e-24
TraesCS2A02G270500	1.00522	5.82396e-08
TraesCS6B02G235400	1.00531	4.86233e-12
TraesCS2A02G518400	1.00566	3.72659e-05
TraesCS5B02G012900	1.00569	1.53178e-17
TraesCS1D02G188500	1.00576	2.28319e-11
TraesCSU02G098500	1.00585	8.99814e-06
TraesCS7B02G153700	1.0059	8.57049e-11
TraesCS6B02G188100	1.00608	5.00064e-09
TraesCS4B02G331300	1.00615	8.73312e-11
TraesCS2B02G291900	1.00629	7.40968e-05
TraesCS4B02G332600	1.00632	2.73457e-29
TraesCS2D02G529000	1.00635	9.00135e-14
TraesCS5D02G445000	1.00642	1.58771e-25
TraesCS6A02G283600	1.00644	2.50305e-05
TraesCS3D02G194100	1.00653	2.3112e-09
TraesCS2A02G217200	1.00657	0.0118063
TraesCS2B02G388900	1.00686	2.26445e-08
TraesCS6B02G456800	1.00688	2.1389e-25
TraesCS1A02G132600	1.00691	4.31137e-19
TraesCS4D02G273600	1.00697	7.18721e-18
TraesCS7D02G421400	1.00747	0.0190816
TraesCS3B02G205900	1.00753	4.98376e-13
TraesCS2D02G169900	1.00756	1.81771e-23
TraesCS7B02G112700	1.00786	5.11445e-24
TraesCS1D02G358500	1.00789	1.28552e-30
TraesCS4A02G093600	1.008	5.26481e-26
TraesCS5A02G360200	1.00803	1.60226e-13
TraesCS6A02G344300	1.00816	1.90197e-12
TraesCS2D02G264800	1.00819	0.00193252
TraesCS7B02G119700	1.00821	3.91109e-05
TraesCS2B02G357600	1.00846	2.81822e-18
TraesCS7D02G408200	1.00864	1.88193e-12
TraesCS2A02G358900	1.00867	1.42863e-08
TraesCS7D02G124700	1.00868	4.111e-05
TraesCS3B02G041800	1.00877	0.00913608
TraesCS4D02G084300	1.0088	0.0116757
TraesCS5B02G012400	1.00906	1.12714e-25
TraesCS7D02G419600	1.00936	0.00326054
TraesCS7A02G266100	1.00937	1.21719e-21
TraesCS4B02G085100	1.00957	0.00190277
TraesCS1D02G175300	1.00976	2.83431e-10
TraesCS3B02G377100	1.00978	0.00379594
TraesCS4A02G044600	1.0101	1.11086e-25
TraesCS7D02G232800	1.01017	9.42563e-16
TraesCS4B02G278000	1.0102	2.4992e-40
TraesCS5B02G147100	1.01025	2.8742e-16
TraesCS4D02G045900	1.01057	5.04514e-07
TraesCS3A02G532000	1.01087	0.00787789
TraesCS7A02G263900	1.01095	6.13259e-16
TraesCS2B02G414400	1.01102	4.71812e-05
TraesCS3A02G352800	1.01111	1.27174e-18
TraesCS1D02G448700	1.01114	3.38962e-18
TraesCS5D02G452700	1.0112	6.74771e-05
TraesCS2D02G458300	1.01123	1.99139e-19
TraesCS2A02G007200	1.01156	0.000241148
TraesCS2B02G213600	1.01162	8.80275e-16
TraesCS5D02G130900	1.01176	0.000769919
TraesCS4A02G096600	1.01188	2.35102e-46
TraesCS5D02G430500	1.01193	0.0103138
TraesCS3A02G340700	1.01218	9.23132e-08
TraesCS3B02G177800	1.01229	0.0241683
TraesCS2B02G546800	1.01237	4.05143e-06
TraesCS5D02G167700	1.0124	1.2352e-39
TraesCS5B02G302300	1.01252	3.87371e-09
TraesCS5D02G184200	1.01259	3.0923e-17
TraesCS2A02G410900	1.01261	2.17254e-06
TraesCS3B02G388700	1.01264	0.00334853
TraesCS2D02G423300	1.01265	2.76327e-06
TraesCS2D02G363900	1.01297	1.02631e-08
TraesCS4A02G289200	1.01332	1.30355e-18
TraesCS4A02G040000	1.01337	0.000345839
TraesCS1D02G018000	1.01346	0.0175429
TraesCS5B02G029100	1.01365	2.74641e-16
TraesCS6A02G281700	1.0137	0.0119862
TraesCS6B02G332400	1.01376	0.00909165
TraesCS4D02G128700	1.01383	3.95872e-24
TraesCS2D02G519800	1.01389	0.000281062
TraesCS2D02G302700	1.01391	6.00663e-10
TraesCS4B02G272400	1.01397	1.59384e-26
TraesCS2D02G066100	1.01401	1.3047e-11
TraesCS3A02G188400	1.01404	1.04606e-30
TraesCS4B02G175100	1.01404	3.87156e-45
TraesCS2A02G455900	1.0141	1.18203e-05
TraesCS4A02G191500	1.01416	4.2067e-14
TraesCS2B02G202900	1.0144	0.00110656
TraesCS2B02G281600	1.01445	2.93153e-19
TraesCSU02G111300	1.0146	0.000194886
TraesCS5D02G150100	1.01473	1.2157e-05
TraesCS5D02G132300	1.01484	3.95772e-08
TraesCS2A02G208300	1.01484	0.0125771
TraesCS7D02G060200	1.01495	2.5235e-10
TraesCS1B02G068400	1.01527	2.14654e-14
TraesCS7A02G307300	1.01542	1.11427e-24
TraesCS6B02G127600	1.01552	4.45941e-05
TraesCS6D02G178900	1.01574	5.82197e-21
TraesCS5A02G485500	1.01581	2.25392e-06
TraesCS2D02G008300	1.01612	2.73272e-07
TraesCS7A02G148100	1.01626	0.00311903
TraesCS4A02G014000	1.01628	2.37976e-08
TraesCS2A02G520200	1.01642	4.10101e-25
TraesCS2D02G406100	1.01646	0.00240224
TraesCS1B02G060500	1.01652	0.0159367
TraesCS3A02G294600	1.01661	3.78062e-08
TraesCS4A02G091200	1.0168	1.36427e-12
TraesCS7D02G150900	1.01718	4.18068e-10
TraesCS6A02G298300	1.01732	1.12469e-05
TraesCS5D02G346000	1.01752	0.00089452
TraesCS3B02G570900	1.01775	6.43977e-06
TraesCS6D02G323000	1.0182	8.07795e-20
TraesCS5A02G468400	1.01858	1.0718e-67
TraesCS4B02G223700	1.01892	2.2377e-08
TraesCS1B02G146700	1.01926	8.94211e-07
TraesCS5D02G292000	1.01941	1.04973e-14
TraesCS4B02G052700	1.01945	2.03332e-06
TraesCS7A02G351400	1.01947	2.6245e-10
TraesCS6D02G145800	1.01952	1.05159e-09
TraesCS4A02G346700	1.01964	0.0002132
TraesCS6A02G345400	1.01969	8.43532e-12
TraesCS3B02G226900	1.0198	0.00041349
TraesCS6B02G354200	1.02001	1.29293e-13
TraesCS6B02G219800	1.02033	4.15677e-15
TraesCS5B02G275100	1.02036	2.95318e-13
TraesCS5B02G236500	1.02038	4.07304e-06
TraesCS1A02G124200	1.0205	2.61025e-12
TraesCS4D02G184500	1.02058	8.22339e-35
TraesCS3D02G389800	1.02059	3.19638e-12
TraesCS2A02G113200	1.0207	4.45746e-06
TraesCS7D02G231600	1.02092	3.76602e-10
TraesCS3D02G259800	1.0211	1.05374e-28
TraesCS3B02G123000	1.0214	5.82718e-12
TraesCS5B02G153900	1.0215	1.70692e-06
TraesCS6D02G154100	1.02157	3.08226e-38
TraesCS6B02G324700	1.02168	3.88131e-18
TraesCS5A02G202600	1.02169	2.79902e-06
TraesCS7A02G189100	1.022	8.01292e-10
TraesCS7D02G345800	1.02211	0.0021432
TraesCS3B02G138000	1.02216	3.09819e-18
TraesCS5A02G494500	1.02218	0.0098923
TraesCS6A02G277300	1.02227	0.00250214
TraesCS2A02G302000	1.02236	1.51291e-16
TraesCS7A02G462900	1.02255	0.000181494
TraesCS1B02G171300	1.02263	0.00432436
TraesCS2D02G455200	1.02274	9.46787e-06
TraesCS6A02G407700	1.02275	2.96948e-09
TraesCS6D02G206700	1.02288	0.000733831
TraesCS1A02G277700	1.02291	0.0221562
TraesCS7B02G080300	1.02292	6.47927e-05
TraesCS6B02G239500	1.02308	3.27846e-14
TraesCS2A02G335600	1.02321	0.00833683
TraesCS7B02G363700	1.02324	6.70932e-07
TraesCS7D02G065200	1.02333	0.0153995
TraesCS4A02G281500	1.02343	2.29688e-51
TraesCS6D02G272500	1.02349	1.17892e-15
TraesCS1A02G000400	1.02374	0.00203154
TraesCS7A02G000300	1.02382	4.57748e-06
TraesCS1B02G143600	1.02389	0.000416959
TraesCS3A02G122400	1.02411	1.98617e-23
TraesCS4B02G049700	1.02431	1.16556e-22
TraesCS3A02G353700	1.02444	1.03427e-24
TraesCS2B02G257400	1.02476	1.66645e-17
TraesCS3A02G185900	1.02489	1.57389e-15
TraesCS5D02G164000	1.02509	0.0110108
TraesCS6D02G371500	1.02512	1.64607e-08
TraesCS2B02G425800	1.02532	1.77334e-15
TraesCS4A02G099900	1.0255	4.37451e-32
TraesCS5A02G414300	1.02555	0.000216785
TraesCS3A02G217500	1.02558	2.06483e-17
TraesCS2A02G320400	1.02559	8.81422e-54
TraesCS7A02G319100	1.02573	0.000914873
TraesCS3D02G227900	1.02575	1.14639e-14
TraesCS4A02G215000	1.02579	8.13563e-27
TraesCS4B02G062400	1.02611	1.58026e-20
TraesCS4B02G155600	1.02614	1.96071e-33
TraesCS6D02G265100	1.02622	5.88591e-16
TraesCS4A02G457100	1.0263	6.30447e-19
TraesCS1B02G383300	1.02631	1.90754e-07
TraesCS7A02G344000	1.02637	1.04264e-14
TraesCS2D02G522400	1.02644	4.65185e-09
TraesCS5A02G110200	1.02684	3.75812e-06
TraesCS6B02G471700	1.02687	1.19941e-12
TraesCS1B02G186200	1.02692	4.3772e-19
TraesCS6A02G034200	1.02698	1.0605e-25
TraesCS5D02G211500	1.02702	3.42004e-14
TraesCS4D02G267800	1.02704	7.63056e-50
TraesCS2D02G197200	1.02716	1.98949e-09
TraesCS2B02G246200	1.02725	0.00764155
TraesCS2A02G341000	1.02739	3.90323e-05
TraesCS4D02G356900	1.02747	0.000657491
TraesCS3D02G079400	1.02764	0.0189948
TraesCS3D02G122200	1.02778	0.000633745
TraesCS7D02G154500	1.02786	1.21563e-15
TraesCS1D02G036500	1.0279	0.0176847
TraesCS4A02G091000	1.02792	1.18408e-11
TraesCS5D02G328200	1.02829	0.00010278
TraesCS4B02G082400	1.02839	0.0110146
TraesCS3A02G251100	1.02841	2.24166e-17
TraesCS5B02G120900	1.02842	5.36519e-05
TraesCS4A02G472600	1.02855	3.73674e-08
TraesCS1D02G452400	1.02866	0.000278461
TraesCS2A02G515700	1.02887	1.38147e-27
TraesCS5D02G091300	1.029	0.000277699
TraesCS1B02G428900	1.02901	6.12268e-32
TraesCS1D02G244700	1.02913	2.56856e-12
TraesCS7B02G309600	1.02918	3.25913e-09
TraesCS1D02G133300	1.02922	2.29154e-12
TraesCS6D02G065200	1.02937	0.000571605
TraesCS1D02G024500	1.02949	0.00341474
TraesCS3B02G415800	1.02961	6.75245e-09
TraesCS7D02G403700	1.02969	2.47552e-22
TraesCS1D02G277100	1.0297	5.73194e-05
TraesCS1B02G394400	1.02974	9.10386e-12
TraesCS3A02G203100	1.02981	3.85285e-35
TraesCS4B02G178500	1.02989	0.00297836
TraesCS5B02G173800	1.02995	3.66811e-17
TraesCS6B02G362300	1.03026	2.74147e-13
TraesCS7A02G462800	1.03112	8.9468e-10
TraesCS3D02G283800	1.03116	1.58529e-06
TraesCS6B02G048200	1.03119	2.28347e-25
TraesCS6B02G333600	1.03123	1.66022e-21
TraesCS3D02G001900	1.03127	0.0201893
TraesCS6A02G177900	1.03132	0.002924
TraesCS1D02G208900	1.03136	9.97305e-19
TraesCS1D02G205700	1.03152	7.9221e-13
TraesCS7A02G220800	1.03153	3.81248e-08
TraesCS6D02G327900	1.03158	1.7769e-11
TraesCS6D02G171400	1.03161	2.74416e-11
TraesCS7D02G426700	1.03167	0.000208651
TraesCS3D02G359000	1.03168	3.45519e-05
TraesCS5A02G213800	1.03175	3.23494e-14
TraesCS7D02G252400	1.03219	0.0218801
TraesCS5B02G339300	1.03222	0.00114245
TraesCS4A02G247500	1.0325	2.67489e-10
TraesCS5B02G234700	1.03261	8.87997e-13
TraesCS3A02G489100	1.03267	1.54846e-15
TraesCS3B02G202600	1.03273	4.60981e-14
TraesCS5B02G188700	1.03276	2.05595e-11
TraesCS7B02G094700	1.03304	0.0117777
TraesCS7D02G262600	1.03324	9.88326e-26
TraesCS3A02G458100	1.03328	1.55995e-08
TraesCS2A02G209500	1.03345	3.20814e-09
TraesCS4D02G251300	1.03349	0.00327617
TraesCS3A02G206400	1.03363	1.90007e-17
TraesCS4B02G233400	1.03364	3.33139e-31
TraesCS1B02G185600	1.03365	0.0153542
TraesCS1A02G133800	1.0338	4.62484e-11
TraesCS6D02G187000	1.03406	7.79995e-09
TraesCS4D02G338900	1.03418	7.93668e-14
TraesCS6D02G117800	1.03424	0.0248219
TraesCS6D02G246200	1.03429	1.0963e-12
TraesCS6B02G048800	1.03457	5.31472e-15
TraesCS7D02G291700	1.03458	4.32867e-07
TraesCS3B02G595200	1.0346	0.0083595
TraesCS4A02G055900	1.03462	3.30477e-07
TraesCS7B02G199500	1.0347	4.35658e-24
TraesCS4B02G135700	1.03473	3.52751e-06
TraesCS7B02G431500	1.03488	1.29413e-16
TraesCS7D02G430700	1.03516	2.34877e-43
TraesCS2A02G152400	1.03555	3.62114e-10
TraesCS1B02G471900	1.03558	0.000100967
TraesCS1A02G179000	1.0357	6.90221e-41
TraesCS5A02G083600	1.03583	8.15467e-10
TraesCS4B02G124300	1.03591	0.0114076
TraesCS6D02G124200	1.03592	1.48203e-11
TraesCS4D02G228700	1.03598	0.00771261
TraesCS1D02G133900	1.03632	0.000549508
TraesCSU02G114100	1.03649	5.73634e-08
TraesCS5A02G556400	1.03654	4.63027e-29
TraesCS5D02G306300	1.03659	5.07843e-09
TraesCS6A02G310300	1.03671	0.00150948
TraesCS3A02G354600	1.0368	3.97041e-10
TraesCS4D02G173300	1.03693	3.42791e-09
TraesCS2A02G127300	1.037	5.92989e-10
TraesCS6D02G146000	1.03701	2.07857e-45
TraesCS7B02G206400	1.03705	1.62093e-09
TraesCS3A02G228800	1.03714	8.4698e-24
TraesCS1A02G066200	1.03733	0.000150994
TraesCS4B02G003500	1.03743	4.60921e-05
TraesCS5D02G032000	1.03745	3.65232e-13
TraesCS2B02G065300	1.03746	0.00943869
TraesCS6D02G014400	1.03753	1.27313e-18
TraesCS1D02G220100	1.03765	0.000104291
TraesCS4D02G212700	1.03782	1.03751e-15
TraesCS2B02G390900	1.03793	0.000207945
TraesCS6D02G332000	1.03807	3.9685e-24
TraesCS6B02G300000	1.0381	0.0167415
TraesCS3D02G008500	1.03826	6.67288e-12
TraesCS1A02G031200	1.03838	2.77804e-39
TraesCS3B02G600900	1.0385	0.000137417
TraesCS5A02G442900	1.03851	0.00129992
TraesCS4D02G028800	1.0387	0.000165323
TraesCS6B02G333500	1.03881	2.78028e-19
TraesCS2B02G242500	1.03891	0.000215838
TraesCS5A02G147500	1.03916	2.00343e-41
TraesCS6A02G245200	1.03931	0.000125605
TraesCS5A02G189700	1.03951	0.00101769
TraesCS1B02G177500	1.04016	1.34459e-05
TraesCS5B02G322000	1.0402	3.29694e-34
TraesCS3A02G111400	1.04022	8.95906e-21
TraesCS1A02G173400	1.04083	1.14471e-23
TraesCS6B02G472900	1.04102	9.59578e-11
TraesCS6B02G301200	1.04149	0.00310634
TraesCS7D02G466100	1.04169	0.0126204
TraesCS2B02G299300	1.04185	3.09046e-16
TraesCS6B02G297300	1.04193	0.00207911
TraesCS7D02G372800	1.04205	5.91304e-17
TraesCS2D02G017900	1.0422	4.52913e-06
TraesCS1B02G198900	1.04255	1.72842e-06
TraesCS1D02G258800	1.04261	4.80858e-46
TraesCS6D02G160100	1.04265	1.60137e-10
TraesCS7D02G228700	1.04266	5.83729e-09
TraesCS7D02G226300	1.04275	7.97225e-51
TraesCS2A02G374500	1.04275	6.84795e-08
TraesCS4A02G422400	1.04276	7.2522e-14
TraesCS6A02G371100	1.04277	9.17913e-53
TraesCS3A02G282500	1.04279	2.0869e-30
TraesCS1B02G293800	1.0432	4.3915e-06
TraesCS3A02G095400	1.04328	2.73547e-08
TraesCS4A02G498600	1.04383	1.24303e-22
TraesCS1A02G258100	1.04383	2.24277e-11
TraesCS5B02G176500	1.04416	4.58163e-05
TraesCS4B02G216800	1.04425	1.69018e-05
TraesCS4B02G305400	1.04441	1.48498e-12
TraesCS2D02G290800	1.04443	6.80216e-35
TraesCS6D02G195300	1.04466	4.25956e-20
TraesCS7D02G528600	1.04469	3.85809e-31
TraesCS2D02G250200	1.04472	4.59788e-08
TraesCS2D02G517600	1.04474	0.0117031
TraesCS7D02G412400	1.04494	1.1048e-14
TraesCS3D02G287800	1.04501	4.43038e-11
TraesCS7B02G244800	1.04521	4.05422e-15
TraesCS2A02G416400	1.04531	0.00141506
TraesCSU02G007300	1.04532	1.14094e-06
TraesCS4B02G318300	1.04539	6.41753e-06
TraesCS3D02G373500	1.04548	9.44112e-31
TraesCS7B02G133400	1.0459	8.80581e-22
TraesCS1A02G149200	1.04598	1.60893e-13
TraesCS2D02G220200	1.04599	5.21811e-08
TraesCS6A02G133700	1.04607	2.92267e-07
TraesCS4D02G075200	1.04611	0.00198843
TraesCS4D02G201600	1.04611	3.32845e-07
TraesCS4B02G269900	1.04618	5.06216e-12
TraesCS5B02G131600	1.04624	1.4979e-15
TraesCS6D02G302200	1.04635	0.00109414
TraesCS6B02G235800	1.04644	1.16987e-08
TraesCS2D02G094500	1.04645	6.94056e-05
TraesCS1A02G364700	1.04651	0.000634544
TraesCS5A02G204600	1.04654	2.05491e-13
TraesCS5D02G054800	1.04654	3.35674e-10
TraesCS3A02G342800	1.04678	1.0263e-25
TraesCS1B02G231900	1.04685	0.00714775
TraesCS5D02G394400	1.04693	3.17724e-05
TraesCS3D02G183700	1.04699	8.17246e-23
TraesCS1D02G206000	1.04727	4.24274e-07
TraesCSU02G049800	1.04745	0.0121207
TraesCS6A02G207300	1.04753	2.70665e-25
TraesCS4A02G017700	1.04763	1.63523e-29
TraesCS3B02G476000	1.04779	1.60987e-07
TraesCS4B02G126300	1.04786	1.61268e-39
TraesCS2A02G313200	1.04787	1.24639e-05
TraesCS5D02G375900	1.04801	6.11343e-08
TraesCS7D02G485600	1.04811	1.28431e-15
TraesCS6D02G138400	1.04812	9.73599e-28
TraesCS6D02G085300	1.04813	3.63437e-37
TraesCS2B02G579000	1.04878	2.44443e-08
TraesCS5A02G533300	1.04915	3.45734e-13
TraesCS6B02G272000	1.04918	2.422e-13
TraesCS6B02G183000	1.04926	4.73612e-06
TraesCS7B02G073800	1.04929	2.75824e-21
TraesCS6D02G178500	1.0493	9.34457e-15
TraesCS6A02G284400	1.04939	1.4634e-51
TraesCS5B02G516500	1.04941	4.95465e-11
TraesCS4B02G230700	1.04951	1.38346e-05
TraesCS3D02G384000	1.04961	3.142e-41
TraesCS4D02G169600	1.05033	8.35999e-23
TraesCS7B02G213000	1.05034	2.12558e-13
TraesCS4D02G210800	1.05042	8.81488e-38
TraesCS4B02G086300	1.05103	0.010458
TraesCS7D02G291600	1.05108	0.02235
TraesCS7B02G198200	1.0511	8.48195e-29
TraesCS5B02G257900	1.05134	7.54946e-23
TraesCS6B02G344900	1.05139	4.88367e-41
TraesCS7D02G543200	1.05139	4.17362e-07
TraesCS5D02G118300	1.05141	0.00213795
TraesCS1B02G465800	1.05142	5.47671e-05
TraesCS3D02G115900	1.05166	5.07359e-08
TraesCS7D02G009600	1.05169	2.11913e-26
TraesCS1D02G235400	1.05181	2.79783e-06
TraesCS2D02G319800	1.05188	3.26594e-07
TraesCS4D02G291600	1.05193	0.0015783
TraesCS1A02G104500	1.05196	0.00552771
TraesCS6A02G302200	1.05202	2.8007e-18
TraesCS1A02G110000	1.05204	0.000644763
TraesCS4D02G091300	1.05238	1.57918e-15
TraesCS1A02G313900	1.05266	0.00939997
TraesCS3B02G498800	1.05267	1.14477e-18
TraesCS7B02G136000	1.05321	2.32287e-10
TraesCS4D02G193200	1.05327	1.64519e-07
TraesCS3B02G315200	1.05336	3.64506e-06
TraesCS4D02G108200	1.05338	1.13739e-41
TraesCS6B02G020900	1.05347	5.87322e-32
TraesCS3A02G362800	1.05365	3.49645e-30
TraesCS7B02G064900	1.05367	6.28544e-20
TraesCS7A02G386800	1.05368	1.40618e-11
TraesCS1A02G256800	1.05378	1.6976e-05
TraesCS4A02G113400	1.05399	0.0115987
TraesCS5A02G159000	1.05412	2.2446e-16
TraesCS1B02G262000	1.0542	1.94091e-31
TraesCS7A02G245200	1.05422	1.68113e-17
TraesCS6D02G082100	1.05423	3.52581e-05
TraesCS2D02G404700	1.05428	3.18146e-16
TraesCS7D02G249000	1.05429	1.78926e-19
TraesCS2A02G342700	1.05473	6.44613e-12
TraesCS3D02G343900	1.0548	3.41402e-32
TraesCS2A02G287300	1.05486	2.51498e-64
TraesCSU02G178500	1.05507	5.61987e-11
TraesCS7B02G129800	1.0551	1.85822e-19
TraesCS6B02G095300	1.05513	0.000442632
TraesCS2D02G476000	1.05518	2.14865e-10
TraesCS3A02G185300	1.05523	6.88712e-14
TraesCS5B02G281700	1.05524	6.43961e-15
TraesCS2B02G185300	1.05534	2.91486e-13
TraesCS3A02G021800	1.05554	1.06114e-06
TraesCS2B02G263800	1.05557	4.28685e-05
TraesCS3D02G183800	1.05562	2.10773e-21
TraesCS2B02G148700	1.05565	8.23963e-16
TraesCS3A02G104500	1.05582	2.94533e-17
TraesCS4A02G035700	1.05592	2.73586e-50
TraesCS7B02G211800	1.05629	3.97251e-15
TraesCS1D02G166800	1.0564	0.000195862
TraesCS7D02G346500	1.05644	2.39468e-09
TraesCS3B02G608800	1.05645	0.000582435
TraesCS3D02G258500	1.05652	3.82738e-11
TraesCS7A02G250300	1.05656	4.40801e-19
TraesCS4A02G293100	1.05677	0.00343836
TraesCS4D02G049200	1.0569	9.83252e-06
TraesCS7D02G539600	1.0569	4.84289e-31
TraesCS1B02G229500	1.05707	3.08415e-13
TraesCS2A02G005000	1.05715	2.66571e-28
TraesCS5D02G164400	1.0573	1.95527e-16
TraesCS7D02G451800	1.05745	2.66934e-18
TraesCS1B02G363700	1.0576	8.81669e-14
TraesCS5A02G467200	1.05766	2.57873e-06
TraesCS1A02G234200	1.0577	3.2999e-16
TraesCS4B02G202700	1.05792	0.0013825
TraesCS2B02G382600	1.05796	9.05965e-05
TraesCS7B02G163800	1.05796	9.32237e-24
TraesCS2D02G444300	1.05809	0.000448028
TraesCS4D02G125000	1.05821	5.52091e-07
TraesCS4D02G219400	1.05825	2.23671e-06
TraesCS6D02G288400	1.05835	6.53185e-34
TraesCS2B02G592600	1.05846	0.00172292
TraesCS7B02G339300	1.05871	4.9501e-38
TraesCS7A02G458600	1.05883	1.82622e-08
TraesCS2A02G539400	1.05883	1.59397e-08
TraesCS6B02G299700	1.05885	1.63929e-22
TraesCS1D02G421300	1.05895	7.07649e-14
TraesCS2A02G380900	1.05896	5.57048e-27
TraesCS5A02G335500	1.05926	5.02693e-25
TraesCS1A02G255200	1.05933	0.0110006
TraesCS2D02G353100	1.05979	0.00497192
TraesCS6A02G160300	1.0598	8.90855e-12
TraesCS2B02G305900	1.05989	1.31775e-07
TraesCS2A02G142300	1.0599	1.24128e-06
TraesCS5A02G494600	1.06004	1.51223e-15
TraesCS5D02G449400	1.06021	5.08114e-14
TraesCS6D02G198700	1.06022	3.98745e-12
TraesCSU02G068100	1.06027	9.01265e-27
TraesCS3B02G073500	1.06078	1.16268e-08
TraesCS3D02G075700	1.06081	9.32328e-19
TraesCS3B02G383700	1.06094	3.6429e-09
TraesCS2D02G207900	1.06108	2.23428e-14
TraesCS4A02G207900	1.06111	4.12124e-24
TraesCS1A02G251900	1.06114	0.000275271
TraesCS3B02G359400	1.06147	0.000383387
TraesCS7B02G392700	1.06166	2.81401e-19
TraesCS3A02G391600	1.06176	1.68241e-09
TraesCS5A02G015300	1.06191	0.018813
TraesCS6B02G259400	1.062	1.2679e-25
TraesCS1A02G139700	1.06206	5.13213e-05
TraesCS1D02G403400	1.06213	7.87345e-61
TraesCS1A02G184300	1.06222	3.15973e-14
TraesCS5D02G108600	1.06243	4.59412e-07
TraesCS1A02G153600	1.06247	1.05606e-12
TraesCS3B02G385900	1.06267	2.39648e-23
TraesCS6B02G160800	1.06268	4.99075e-14
TraesCS7D02G511100	1.06273	0.00258887
TraesCS1D02G109700	1.06273	2.46951e-23
TraesCS2D02G391600	1.06287	9.72675e-07
TraesCS7B02G071500	1.06293	3.43579e-11
TraesCS2B02G131200	1.06299	0.00981637
TraesCS5B02G045800	1.06312	0.000277458
TraesCS7B02G200200	1.06318	1.14899e-11
TraesCS6B02G383300	1.06319	0.000118318
TraesCS1A02G139400	1.06337	2.50225e-17
TraesCS3B02G141400	1.06339	8.18705e-35
TraesCS5D02G538900	1.06363	0.0123109
TraesCS7B02G392600	1.06382	6.70881e-65
TraesCS1B02G126500	1.06382	2.42684e-49
TraesCS7D02G431100	1.0639	4.43153e-08
TraesCS3B02G255200	1.06393	0.000157463
TraesCS2D02G324800	1.06401	0.00133544
TraesCS6A02G068400	1.06416	5.05756e-05
TraesCS6B02G130600	1.06417	1.97233e-05
TraesCS5D02G403300	1.06435	3.35735e-09
TraesCS3A02G439000	1.06449	3.08813e-12
TraesCS4A02G002600	1.0645	1.38642e-07
TraesCS2B02G508600	1.06463	0.00823347
TraesCS5A02G138000	1.06465	2.07898e-10
TraesCS2B02G267300	1.06518	1.83603e-10
TraesCS3A02G152500	1.0653	3.89611e-12
TraesCS5D02G011700	1.06531	0.00488294
TraesCS7D02G358200	1.06539	2.8544e-54
TraesCS7A02G470300	1.06541	0.0226974
TraesCS2D02G435900	1.06563	3.30936e-06
TraesCS6A02G116700	1.06563	5.72019e-07
TraesCS2D02G551400	1.0657	0.000536911
TraesCS5B02G001100	1.06575	7.43679e-12
TraesCS1D02G184900	1.06576	0.000106107
TraesCS3D02G345500	1.0658	1.14993e-10
TraesCS5B02G160500	1.06584	5.10258e-13
TraesCS1D02G145500	1.06602	3.11441e-11
TraesCS3A02G298800	1.0661	3.68133e-24
TraesCS1A02G194800	1.06626	7.35112e-15
TraesCS5B02G395300	1.06629	0.0139815
TraesCS5D02G378500	1.06635	1.12327e-06
TraesCS5A02G162000	1.06642	2.88261e-30
TraesCS1D02G354900	1.06657	1.08524e-15
TraesCS2B02G499600	1.06663	3.21514e-37
TraesCS4A02G192300	1.06671	0.000494816
TraesCS5B02G147500	1.06677	5.84418e-09
TraesCS5D02G510200	1.06687	7.93795e-05
TraesCS4A02G145300	1.0669	4.81633e-05
TraesCS1B02G326600	1.06694	1.90704e-13
TraesCS1B02G131000	1.06708	2.49398e-20
TraesCS2A02G030200	1.06712	3.13114e-12
TraesCS5D02G246800	1.06726	4.43035e-30
TraesCS2D02G189700	1.06737	2.86339e-08
TraesCS3B02G048400	1.06743	0.0247632
TraesCS2B02G516700	1.06757	6.023e-70
TraesCS6A02G285400	1.06784	4.17961e-18
TraesCS3B02G128100	1.06787	0.00167717
TraesCS5D02G447400	1.06795	9.48816e-14
TraesCSU02G053600	1.06829	2.03261e-42
TraesCS7B02G078700	1.06833	7.0493e-05
TraesCS6D02G297600	1.06834	2.42829e-19
TraesCS5A02G540900	1.06871	0.00227736
TraesCS7D02G376700	1.06879	0.0135325
TraesCS3B02G412300	1.06899	6.47792e-24
TraesCS5B02G222900	1.06911	2.70812e-09
TraesCS5D02G529100	1.06918	1.74998e-08
TraesCS1B02G278200	1.06921	2.29606e-23
TraesCS6D02G203000	1.06932	2.90414e-21
TraesCS3D02G341500	1.06933	1.66082e-06
TraesCS6A02G149000	1.06949	2.45476e-27
TraesCS5A02G204800	1.06976	4.40277e-08
TraesCS5A02G226600	1.06998	1.3822e-13
TraesCS7D02G468900	1.07038	1.4219e-10
TraesCS5A02G374300	1.07039	8.34737e-33
TraesCS2B02G542100	1.07048	0.021857
TraesCS5A02G091500	1.07053	9.09381e-15
TraesCS1A02G198100	1.07068	6.99717e-19
TraesCS2D02G283800	1.07068	0.00948841
TraesCS6A02G321900	1.07088	0.00556688
TraesCSU02G014500	1.07102	1.20065e-05
TraesCS3A02G438900	1.07122	5.20179e-12
TraesCS3B02G434700	1.07123	1.39024e-09
TraesCS5A02G411200	1.07129	1.306e-47
TraesCS5B02G395200	1.07138	1.82205e-22
TraesCS7D02G380900	1.07143	6.98832e-16
TraesCS7A02G561600	1.07149	5.1595e-13
TraesCS1B02G479600	1.07153	1.26977e-17
TraesCS2D02G382600	1.07157	1.26828e-17
TraesCS5D02G078700	1.07199	6.82865e-22
TraesCS6B02G051800	1.07239	5.5359e-06
TraesCS5A02G196100	1.07249	9.30963e-08
TraesCS7A02G424700	1.0726	1.87819e-22
TraesCS1A02G195700	1.07264	3.11513e-15
TraesCS4D02G033700	1.07267	2.62853e-17
TraesCS1A02G164200	1.07268	1.71566e-25
TraesCS2D02G174300	1.07274	8.451e-10
TraesCS1B02G439200	1.07283	1.45757e-06
TraesCS5D02G020000	1.07296	2.25111e-09
TraesCS1B02G205800	1.07302	2.06811e-11
TraesCS3A02G433300	1.07307	6.8198e-14
TraesCS4D02G208700	1.07309	2.57121e-46
TraesCS7D02G160100	1.07312	8.42729e-13
TraesCS6A02G242700	1.07316	1.38342e-10
TraesCS4D02G068400	1.07323	4.66501e-13
TraesCS3A02G150300	1.07338	1.3013e-14
TraesCS5A02G208500	1.07343	0.000219582
TraesCS6D02G343000	1.07359	3.00473e-16
TraesCS4A02G220900	1.07365	0.000314154
TraesCS1D02G211300	1.07367	1.14971e-06
TraesCS3B02G357800	1.07368	2.10946e-17
TraesCS7D02G552700	1.07384	2.69972e-23
TraesCS5D02G379800	1.07414	0.015615
TraesCS1A02G215600	1.07424	8.64029e-09
TraesCS4D02G288800	1.0744	2.77578e-06
TraesCS4D02G152800	1.07463	5.58963e-05
TraesCS2B02G151200	1.07468	1.69585e-06
TraesCS1D02G260900	1.07476	4.0077e-38
TraesCS1A02G105900	1.07505	1.3015e-12
TraesCS1D02G240100	1.07519	6.04101e-09
TraesCS7A02G294500	1.0753	3.94588e-18
TraesCS6B02G239800	1.07534	1.1964e-15
TraesCS2D02G308100	1.07534	2.23486e-57
TraesCS2A02G257000	1.07538	1.25978e-22
TraesCS1B02G250300	1.0754	4.71096e-11
TraesCS2A02G285700	1.07565	2.03083e-19
TraesCS7A02G265800	1.07581	4.48222e-16
TraesCS1D02G428400	1.07582	3.91092e-15
TraesCS7D02G027100	1.07594	6.8187e-19
TraesCS1D02G140300	1.076	6.74217e-05
TraesCS3B02G397800	1.07604	0.0177362
TraesCS4B02G047500	1.07613	0.0002276
TraesCS4A02G299300	1.07621	1.08416e-05
TraesCS1B02G286900	1.07655	1.71814e-06
TraesCS1D02G286000	1.07673	1.3383e-06
TraesCS7A02G286900	1.07678	3.89363e-19
TraesCS3D02G312800	1.07688	4.02213e-13
TraesCS5B02G122000	1.07698	2.75967e-12
TraesCS1A02G137400	1.07704	5.90121e-09
TraesCS2B02G354400	1.07725	8.14273e-39
TraesCS2A02G310500	1.07732	0.000167827
TraesCS5A02G078400	1.07732	1.1999e-26
TraesCS3B02G102800	1.07736	4.24434e-10
TraesCS2B02G501300	1.07737	7.02858e-08
TraesCS3A02G427100	1.07747	4.88488e-12
TraesCS1D02G198000	1.07754	3.95316e-08
TraesCS5A02G126700	1.07758	7.67155e-12
TraesCS7B02G030700	1.0776	2.44159e-08
TraesCS7D02G248000	1.07769	4.06494e-47
TraesCS1A02G293400	1.07804	0.00869786
TraesCS1A02G069700	1.07804	0.00102734
TraesCS7A02G408600	1.07809	5.66326e-16
TraesCS6A02G226100	1.07824	2.6163e-15
TraesCS3A02G208900	1.07837	5.60922e-07
TraesCS2B02G289000	1.0785	1.774e-17
TraesCS1A02G418300	1.07868	9.79631e-29
TraesCS2A02G321000	1.07888	1.86472e-05
TraesCS1A02G153100	1.07891	2.36193e-27
TraesCS3D02G165400	1.07898	0.00353263
TraesCS5B02G314100	1.0791	4.65272e-16
TraesCS6D02G181800	1.07921	8.34345e-08
TraesCS6B02G193100	1.07924	3.67007e-08
TraesCS3D02G065200	1.07944	3.15835e-09
TraesCS3B02G196000	1.07953	3.40674e-06
TraesCS1B02G280500	1.07981	0.000503402
TraesCS7A02G487400	1.08037	1.85463e-06
TraesCS3D02G329500	1.08038	7.41699e-19
TraesCS7B02G140900	1.08039	9.32995e-24
TraesCS4B02G145600	1.08053	2.08844e-13
TraesCS4D02G034600	1.08055	1.69218e-20
TraesCS1B02G256200	1.08071	5.3074e-21
TraesCS5B02G449700	1.08076	1.85936e-05
TraesCS4D02G230200	1.0808	6.55022e-14
TraesCS3A02G098600	1.08088	3.44175e-05
TraesCS5D02G023700	1.08099	0.00165064
TraesCS4A02G235700	1.081	1.2458e-09
TraesCS5A02G445700	1.08102	3.40308e-06
TraesCS7D02G504600	1.08109	2.01898e-11
TraesCS4A02G158100	1.08172	6.70146e-34
TraesCS2B02G363100	1.08194	0.00951131
TraesCS2A02G359700	1.08203	0.00110113
TraesCS6D02G288700	1.08204	2.50575e-10
TraesCS3A02G025700	1.08207	1.12416e-14
TraesCS3A02G209700	1.08214	8.15938e-30
TraesCS4B02G287100	1.08226	0.000371193
TraesCS4D02G054500	1.08227	1.09996e-12
TraesCS6A02G146000	1.08231	0.0062311
TraesCS3D02G541200	1.08235	3.65408e-14
TraesCS1D02G424400	1.08243	5.4827e-26
TraesCS4A02G171800	1.0827	1.45273e-17
TraesCS2A02G220600	1.08289	1.05203e-09
TraesCS1A02G196300	1.08305	2.16629e-23
TraesCS1D02G129900	1.08316	1.8882e-12
TraesCS7D02G297000	1.08328	4.48721e-47
TraesCS2B02G271800	1.08338	5.13128e-22
TraesCS3D02G124000	1.08355	0.0121717
TraesCS2A02G096200	1.08396	2.99921e-06
TraesCS3B02G270300	1.08407	1.57438e-29
TraesCS3B02G488400	1.08409	1.10856e-38
TraesCS3B02G217300	1.08409	7.29208e-45
TraesCS4B02G012100	1.08421	2.9773e-30
TraesCS4D02G149000	1.08433	3.31057e-11
TraesCS3B02G367700	1.08437	2.81293e-06
TraesCS5A02G139300	1.08454	0.0124185
TraesCSU02G173800	1.08483	0.00949134
TraesCS5D02G450800	1.08492	0.0211817
TraesCS3B02G153700	1.08498	1.60026e-06
TraesCS2D02G165900	1.08503	7.02859e-10
TraesCS7A02G394400	1.0852	9.99784e-22
TraesCS5A02G486400	1.08525	4.16384e-12
TraesCS7D02G266100	1.08527	0.00482626
TraesCS7A02G063700	1.0853	9.56831e-17
TraesCS2D02G229100	1.08534	4.46859e-32
TraesCS2B02G345600	1.08547	8.95997e-17
TraesCS5B02G456400	1.08549	0.0162356
TraesCS4B02G148900	1.08553	0.00523849
TraesCS6D02G296000	1.08556	1.25953e-06
TraesCS5D02G407800	1.08556	7.53236e-10
TraesCS5D02G559100	1.08565	2.83167e-07
TraesCS3B02G234000	1.08578	3.16404e-17
TraesCS4D02G030300	1.0862	4.24093e-14
TraesCS7B02G153900	1.08641	0.000310288
TraesCS6A02G405200	1.08647	9.25402e-17
TraesCS4A02G253400	1.08651	2.89307e-07
TraesCS5A02G218000	1.0866	1.19589e-09
TraesCS3A02G252800	1.08677	4.11347e-18
TraesCS5D02G131200	1.08698	5.16886e-17
TraesCS5A02G236200	1.08727	8.17455e-05
TraesCS4A02G167800	1.0874	1.63371e-05
TraesCS7B02G174800	1.08752	1.10863e-13
TraesCS3A02G122200	1.08762	1.1227e-31
TraesCS5D02G494400	1.08768	5.80704e-09
TraesCS4B02G062000	1.08774	5.90645e-08
TraesCS6B02G233400	1.08791	0.000471267
TraesCS1B02G251000	1.08807	4.4847e-36
TraesCS4B02G043000	1.0881	1.38321e-17
TraesCS3A02G305800	1.08829	2.56427e-06
TraesCS5A02G087600	1.08861	0.00029714
TraesCS6D02G249400	1.08867	8.1365e-09
TraesCS3A02G326200	1.08874	1.59207e-12
TraesCS5A02G402700	1.08884	5.39347e-12
TraesCS5B02G165200	1.08922	1.75763e-53
TraesCS7D02G105500	1.08923	1.80691e-28
TraesCS5A02G136100	1.08929	1.91765e-20
TraesCS6B02G303300	1.08948	3.34476e-47
TraesCS5A02G120600	1.08949	1.18762e-27
TraesCS5D02G400100	1.08955	6.63763e-22
TraesCS4B02G085200	1.08962	5.07381e-05
TraesCS1D02G079300	1.08965	3.28505e-29
TraesCS6A02G285900	1.08967	5.65735e-31
TraesCS2B02G299900	1.08994	0.000319894
TraesCS5D02G492200	1.09002	0.00735372
TraesCS5B02G426600	1.0901	3.15156e-16
TraesCS7D02G101500	1.09011	7.3345e-16
TraesCS2A02G187000	1.09016	6.38272e-07
TraesCS5A02G002600	1.09019	2.37685e-20
TraesCS4B02G235700	1.0902	0.00768577
TraesCS5A02G092000	1.09024	2.31424e-27
TraesCS3D02G139300	1.09053	1.73524e-11
TraesCS4A02G143000	1.09056	6.52029e-40
TraesCS4B02G282200	1.09071	2.09866e-07
TraesCS2D02G471900	1.09085	0.000311907
TraesCS4D02G326400	1.09096	1.85752e-26
TraesCS1D02G305300	1.09098	4.14113e-09
TraesCS3A02G204600	1.09099	8.27976e-25
TraesCS3B02G110900	1.09101	2.2169e-12
TraesCS7B02G140700	1.09112	4.02634e-07
TraesCS1B02G182100	1.09112	4.07836e-10
TraesCS6B02G148100	1.09116	0.00952354
TraesCS1A02G192300	1.09123	3.87273e-14
TraesCS1D02G272300	1.09134	0.00256805
TraesCS7A02G213000	1.09141	0.000102292
TraesCS6D02G186900	1.09145	8.51757e-15
TraesCS6A02G362500	1.09159	4.19016e-06
TraesCS3D02G053600	1.09164	5.81975e-32
TraesCS5D02G001200	1.09177	2.44651e-37
TraesCS4B02G038000	1.09198	1.69453e-09
TraesCS2B02G288100	1.09201	8.93934e-49
TraesCS3B02G214000	1.09207	1.35784e-10
TraesCS3A02G442100	1.09213	3.44982e-07
TraesCS1D02G368200	1.09215	0.00166653
TraesCS1A02G427500	1.09222	1.44798e-07
TraesCS4A02G208100	1.09226	2.39385e-09
TraesCS3B02G573400	1.09235	0.00803973
TraesCS6D02G087200	1.09236	0.000263784
TraesCS7A02G497900	1.09237	0.00258075
TraesCS7B02G253400	1.09238	1.03328e-28
TraesCS7A02G364600	1.0924	1.5746e-54
TraesCS4D02G030400	1.09241	2.11141e-12
TraesCS3B02G126700	1.09249	3.17504e-12
TraesCS7B02G088000	1.09283	2.1815e-06
TraesCS1A02G153900	1.09292	8.25083e-35
TraesCS3D02G489600	1.09307	9.70825e-23
TraesCS6B02G220000	1.0931	5.99907e-17
TraesCS7D02G454400	1.09327	0.0227771
TraesCS3A02G325600	1.09329	0.00219959
TraesCS3B02G379800	1.0934	3.44519e-06
TraesCS7B02G411900	1.09341	2.43311e-15
TraesCS3B02G311300	1.0936	4.24722e-05
TraesCS7A02G426800	1.09372	0.00622895
TraesCS2D02G283400	1.09376	4.92195e-42
TraesCS3B02G325800	1.09389	5.00754e-19
TraesCS3A02G314400	1.09395	2.26407e-10
TraesCS3A02G349200	1.094	0.0181373
TraesCS5D02G174400	1.09404	3.90691e-35
TraesCS5B02G493400	1.0943	1.33447e-08
TraesCS3B02G239800	1.09468	0.000273056
TraesCS2A02G323200	1.09475	0.0229161
TraesCS5D02G208100	1.09512	3.93051e-10
TraesCS2A02G160200	1.09517	2.43967e-12
TraesCS5A02G022700	1.09527	2.01331e-09
TraesCS1B02G171400	1.09575	5.06093e-13
TraesCS7D02G249500	1.09579	0.000203443
TraesCS2A02G289300	1.09579	2.5286e-09
TraesCS4D02G084000	1.09591	0.00020341
TraesCS2B02G117800	1.09594	0.00375445
TraesCS2A02G472000	1.09615	5.4036e-06
TraesCS3A02G187400	1.09616	0.00875241
TraesCS1B02G139200	1.0963	7.44676e-05
TraesCS6D02G002000	1.0963	1.16592e-07
TraesCS2B02G076800	1.09645	9.5891e-15
TraesCS1D02G380400	1.09649	0.0126864
TraesCSU02G005100	1.09663	4.9317e-83
TraesCS3B02G142300	1.09666	0.00734306
TraesCS7D02G222000	1.09667	0.000231438
TraesCS2D02G335900	1.09678	1.82324e-26
TraesCS1A02G259900	1.09684	0.0231203
TraesCS5D02G253200	1.09717	0.000152442
TraesCS7B02G064400	1.09727	2.29185e-05
TraesCS4A02G372400	1.09732	5.39277e-10
TraesCS3D02G364100	1.09734	7.12203e-11
TraesCS1A02G352700	1.09735	0.00010527
TraesCS5A02G237600	1.09748	0.000926281
TraesCS6B02G472100	1.09752	0.0082798
TraesCS3D02G113600	1.0976	7.49029e-28
TraesCS2A02G269100	1.09764	7.01536e-10
TraesCS3B02G394100	1.09764	9.78959e-23
TraesCS1A02G038400	1.09791	0.000150166
TraesCS6B02G148200	1.09791	8.7403e-47
TraesCS2A02G286300	1.09794	0.00137413
TraesCS7A02G335400	1.0981	5.35561e-36
TraesCS6B02G316000	1.09818	7.37912e-05
TraesCS1A02G158900	1.09829	5.07057e-19
TraesCS7D02G413700	1.0983	0.000156783
TraesCS1A02G338200	1.09836	1.41847e-16
TraesCS7B02G259700	1.09852	0.00555235
TraesCS4B02G229100	1.09853	6.69309e-19
TraesCS1B02G268500	1.09867	3.71826e-17
TraesCS2A02G386300	1.0987	0.019135
TraesCS3D02G187900	1.09884	2.64094e-43
TraesCS4D02G147400	1.09885	4.73842e-16
TraesCS6D02G151400	1.0989	5.78511e-21
TraesCS3D02G055700	1.09896	0.00423004
TraesCS4B02G151600	1.09919	5.15251e-12
TraesCS5A02G075900	1.0992	3.63285e-24
TraesCS1B02G111300	1.09923	0.000126291
TraesCS2B02G208500	1.09926	8.13167e-09
TraesCS5A02G097100	1.09932	1.88355e-11
TraesCS5A02G188800	1.09937	1.41279e-10
TraesCS7A02G292400	1.09945	7.32064e-34
TraesCS4A02G308300	1.09948	0.000102926
TraesCS6A02G207100	1.09953	3.05573e-23
TraesCS7A02G235700	1.09974	2.52366e-13
TraesCS5A02G297100	1.09975	0.00103885
TraesCS5B02G378600	1.09976	0.00461739
TraesCS2B02G396400	1.09979	0.00175671
TraesCS1D02G105600	1.09996	4.68371e-14
TraesCS5D02G098000	1.10015	0.0184969
TraesCS7B02G393300	1.10019	2.9831e-09
TraesCS4A02G365200	1.10031	1.62747e-09
TraesCS5A02G071200	1.10041	2.94457e-05
TraesCS5B02G082000	1.10051	8.95456e-23
TraesCS6B02G449800	1.10053	3.10946e-23
TraesCS4B02G069500	1.10057	1.22766e-08
TraesCS3B02G287800	1.10087	1.29339e-19
TraesCS7A02G283500	1.101	5.5689e-32
TraesCS1D02G431000	1.10118	0.0231418
TraesCS7B02G485000	1.10136	5.1641e-08
TraesCS2B02G445700	1.10138	0.00011473
TraesCS6B02G363500	1.10147	6.00213e-18
TraesCS2B02G392100	1.10149	1.40416e-06
TraesCS3D02G403300	1.10153	3.01209e-19
TraesCS2A02G198500	1.10154	2.12322e-65
TraesCS2A02G097100	1.10181	2.75745e-07
TraesCS5D02G069700	1.10191	2.53544e-24
TraesCS4B02G068500	1.1021	2.81456e-10
TraesCS7A02G384100	1.10213	2.44748e-06
TraesCSU02G104300	1.10224	3.48151e-24
TraesCS7B02G009300	1.10244	1.59151e-09
TraesCS6D02G123100	1.10258	3.79421e-08
TraesCS6A02G097000	1.1026	3.14246e-18
TraesCS5A02G178900	1.10277	1.05184e-05
TraesCS2D02G525000	1.10278	3.02945e-07
TraesCS3A02G358800	1.10317	2.20072e-14
TraesCS1D02G230100	1.10336	1.11048e-24
TraesCS6B02G253300	1.1037	0.00266031
TraesCS2B02G452900	1.10371	8.14152e-18
TraesCS1B02G224100	1.10435	7.31279e-28
TraesCS3A02G395000	1.10438	7.71967e-13
TraesCS3B02G004700	1.10441	6.16587e-11
TraesCS3D02G159900	1.10466	1.09064e-08
TraesCS7A02G354400	1.10469	2.38835e-15
TraesCS1D02G310400	1.10485	1.13174e-11
TraesCS7D02G390300	1.10492	1.0708e-13
TraesCS4B02G123800	1.10495	2.47191e-15
TraesCS4D02G022700	1.10496	4.47088e-12
TraesCS5D02G145100	1.10512	7.39907e-60
TraesCS6B02G222400	1.10547	4.85029e-22
TraesCS4B02G100100	1.10554	2.09237e-24
TraesCS2B02G359500	1.10559	0.000103078
TraesCS6A02G419200	1.1056	1.43285e-08
TraesCS2D02G297300	1.10571	0.000170695
TraesCS1A02G025600	1.10589	1.85546e-05
TraesCS1A02G365200	1.10592	0.0188737
TraesCS2B02G408500	1.10642	1.19475e-21
TraesCS3A02G167400	1.10643	3.50224e-09
TraesCS3A02G487500	1.10651	8.20404e-13
TraesCS3A02G512600	1.10659	6.07994e-17
TraesCS6A02G223700	1.10663	2.84602e-25
TraesCS6B02G307300	1.10674	1.48196e-06
TraesCS1A02G186700	1.10676	1.21987e-14
TraesCS2B02G357400	1.10679	1.82481e-08
TraesCS6A02G392000	1.10686	2.77299e-24
TraesCS6B02G230900	1.10711	1.03693e-30
TraesCS6B02G234200	1.10713	2.12692e-12
TraesCS2A02G380100	1.10715	8.10722e-09
TraesCS1D02G069800	1.10724	0.0127037
TraesCS7D02G440000	1.10726	0.00490947
TraesCS7B02G221500	1.10732	1.37395e-31
TraesCS7A02G095800	1.1074	5.73567e-06
TraesCS6B02G367400	1.1076	5.55531e-10
TraesCS7B02G245200	1.10762	1.92622e-06
TraesCS2A02G499900	1.10769	0.0147895
TraesCS2A02G304100	1.10793	1.35771e-14
TraesCS7D02G147600	1.10799	0.0236445
TraesCS2A02G399200	1.1081	1.15444e-37
TraesCS3D02G160300	1.10822	0.0207432
TraesCS7A02G204500	1.10823	9.66844e-07
TraesCS5D02G013600	1.10826	2.86614e-12
TraesCS4A02G036000	1.10831	0.00179995
TraesCS5A02G338200	1.10835	0.0107906
TraesCS5A02G164600	1.10842	3.48204e-53
TraesCS3D02G191600	1.10864	5.96555e-39
TraesCS2A02G196100	1.10866	1.65347e-06
TraesCS3B02G405800	1.10871	1.16856e-05
TraesCS5A02G274800	1.10876	1.58927e-21
TraesCS6D02G238100	1.10886	2.5048e-15
TraesCS4A02G059300	1.10886	1.24666e-10
TraesCS1A02G077200	1.10887	1.32005e-30
TraesCS6A02G400000	1.10893	4.10454e-68
TraesCS2B02G466400	1.10894	0.000103646
TraesCS3B02G226300	1.10908	3.23709e-38
TraesCS7A02G502100	1.10941	1.54811e-06
TraesCS2D02G038300	1.10954	4.0441e-09
TraesCS7A02G382900	1.10957	0.000870169
TraesCS5A02G461300	1.10959	1.93859e-06
TraesCS3B02G224400	1.10963	9.73247e-23
TraesCS3A02G064400	1.1097	0.0101525
TraesCS5D02G191500	1.10992	6.79149e-41
TraesCS5A02G469000	1.10997	6.2929e-29
TraesCS6B02G462400	1.11	0.0257463
TraesCS2D02G092600	1.11004	4.90355e-25
TraesCSU02G088100	1.11005	7.70036e-06
TraesCS7A02G312900	1.11017	0.000361519
TraesCS1D02G204200	1.11027	5.46414e-21
TraesCS6B02G029000	1.11035	1.03352e-11
TraesCS2D02G206900	1.11059	7.74695e-12
TraesCS5A02G502600	1.1106	7.49047e-07
TraesCS2A02G406800	1.11061	4.41061e-08
TraesCS6D02G350900	1.11067	0.00799143
TraesCS5B02G414900	1.11084	1.42848e-55
TraesCS3D02G158200	1.11099	4.2164e-25
TraesCS7D02G123000	1.11115	0.008156
TraesCS7A02G204100	1.11121	5.50515e-16
TraesCS5A02G169800	1.11138	0.0098272
TraesCS2A02G026900	1.11143	2.04511e-23
TraesCS6D02G363800	1.11147	3.89266e-22
TraesCS6A02G169300	1.11163	1.2571e-46
TraesCS4A02G315000	1.1117	0.000896691
TraesCS5D02G505900	1.1118	7.62641e-21
TraesCS7D02G469100	1.11224	1.13339e-28
TraesCS6A02G219400	1.11257	1.46204e-16
TraesCS5D02G410700	1.11269	0.00157221
TraesCS3A02G036300	1.11272	0.000573879
TraesCS1D02G089400	1.11283	1.06771e-30
TraesCS3B02G208300	1.11291	9.06041e-21
TraesCS1D02G001600	1.11309	4.43568e-52
TraesCS3B02G232200	1.11324	0.00365194
TraesCS1A02G066900	1.11326	3.28978e-73
TraesCS4D02G120600	1.11327	5.79465e-08
TraesCS1A02G043200	1.11334	2.47185e-24
TraesCS5B02G094900	1.11334	1.3892e-07
TraesCS2D02G263200	1.11336	1.71027e-30
TraesCS7A02G269100	1.11337	5.25917e-25
TraesCS4B02G047700	1.11343	3.37282e-41
TraesCS1A02G262800	1.11365	9.84158e-19
TraesCS4D02G122100	1.11383	5.91177e-23
TraesCS7A02G555700	1.11384	1.92454e-23
TraesCS2A02G303800	1.11394	3.22738e-06
TraesCS4B02G234900	1.11399	1.48797e-14
TraesCS7A02G463200	1.11406	7.85656e-13
TraesCS6D02G143300	1.11424	1.88692e-13
TraesCS7A02G304300	1.11441	0.000468732
TraesCS5D02G179600	1.11441	2.27203e-23
TraesCS7D02G228000	1.11446	3.74109e-18
TraesCS7A02G527000	1.11449	0.000957223
TraesCS2D02G298000	1.1145	3.88253e-19
TraesCS2B02G159500	1.11451	4.91175e-22
TraesCS1B02G269800	1.11461	1.19828e-14
TraesCS5D02G506900	1.11465	1.97433e-12
TraesCS3B02G503800	1.11474	3.15948e-18
TraesCS2D02G078500	1.11479	2.99911e-16
TraesCS2A02G163200	1.11483	1.07114e-07
TraesCS4B02G255400	1.11516	1.46741e-08
TraesCS2A02G299900	1.11516	5.57347e-05
TraesCS7A02G384500	1.11529	6.48171e-17
TraesCS6B02G092400	1.11568	1.77079e-07
TraesCS5D02G502700	1.1157	0.0215487
TraesCS6A02G184400	1.11577	7.2118e-13
TraesCS3A02G041200	1.11607	1.53842e-16
TraesCS4B02G101800	1.11623	1.08369e-43
TraesCS6A02G373200	1.11633	1.08963e-33
TraesCS4B02G014400	1.11634	0.000458605
TraesCS7B02G128300	1.11647	0.000101808
TraesCS1D02G116800	1.11648	4.14062e-07
TraesCS4D02G054300	1.11671	1.35443e-08
TraesCS6A02G035500	1.11679	0.0208768
TraesCS2B02G133200	1.11693	1.34002e-20
TraesCS5D02G549500	1.11709	4.09145e-05
TraesCS3D02G087500	1.11716	1.34167e-12
TraesCS2B02G491200	1.11746	3.95242e-70
TraesCS6D02G232300	1.11746	7.46763e-15
TraesCS3D02G058800	1.11748	2.47806e-09
TraesCS4B02G097000	1.11748	3.83752e-31
TraesCS7D02G318700	1.11763	2.19875e-08
TraesCS3D02G336800	1.11767	7.36972e-27
TraesCS5A02G027200	1.11784	3.59374e-07
TraesCS4B02G255600	1.11785	7.03074e-11
TraesCS6A02G219500	1.11804	2.15338e-32
TraesCS6B02G314300	1.11805	1.71809e-19
TraesCS1D02G409900	1.11807	0.00499811
TraesCS2B02G008900	1.11811	3.55208e-29
TraesCS7D02G336300	1.1184	1.16019e-14
TraesCS7D02G475900	1.11844	1.94167e-67
TraesCS3A02G103000	1.11844	6.01522e-19
TraesCS6A02G332000	1.11875	7.66309e-07
TraesCS2A02G421400	1.11877	1.59192e-36
TraesCS3A02G333200	1.11886	8.78734e-22
TraesCS2B02G302800	1.11945	2.37344e-15
TraesCS5B02G262700	1.11946	0.0030432
TraesCS2B02G261900	1.11949	0.00114217
TraesCS5A02G171900	1.11952	6.88648e-08
TraesCS6A02G357300	1.11955	4.84043e-06
TraesCS3D02G177900	1.11959	0.00169098
TraesCS2B02G180200	1.1197	2.67433e-26
TraesCS5B02G007600	1.12	9.06612e-19
TraesCS1A02G397300	1.12019	2.65904e-27
TraesCS4B02G093200	1.12023	3.90077e-10
TraesCS6D02G352400	1.12032	1.14643e-09
TraesCS2B02G602800	1.12056	3.87867e-31
TraesCS3D02G216200	1.12067	6.82324e-43
TraesCS7D02G502800	1.12068	0.000578512
TraesCS4D02G092500	1.12084	0.00332
TraesCS3A02G308000	1.12101	1.77795e-36
TraesCS5A02G372900	1.12104	8.96446e-46
TraesCS2D02G111900	1.12111	8.01829e-05
TraesCS5D02G535900	1.12117	0.0124449
TraesCS6A02G099700	1.12125	3.00906e-09
TraesCS1B02G322400	1.12127	6.68116e-14
TraesCS7A02G538600	1.12154	1.27691e-32
TraesCS5B02G087600	1.12164	0.00463156
TraesCS1A02G146900	1.12164	9.69845e-07
TraesCS3D02G117800	1.12173	1.40846e-09
TraesCS6A02G184100	1.1218	2.23257e-28
TraesCS7B02G136600	1.12199	1.94574e-09
TraesCS7D02G245500	1.12218	1.06972e-17
TraesCS3B02G396600	1.12222	0.00394178
TraesCS5D02G121900	1.12269	4.63088e-13
TraesCS3A02G325700	1.1227	0.00030228
TraesCS5A02G437900	1.12304	2.97563e-29
TraesCS2D02G189600	1.1231	1.90769e-10
TraesCS5D02G343000	1.1231	4.58823e-46
TraesCS5D02G411800	1.12317	3.21472e-13
TraesCS1B02G173300	1.12317	1.14411e-10
TraesCS1A02G190500	1.12318	4.06142e-12
TraesCS5A02G175600	1.12319	3.06194e-26
TraesCS3D02G430300	1.12328	4.65315e-07
TraesCS5D02G202600	1.12334	2.35081e-07
TraesCS1D02G112500	1.12358	4.8793e-10
TraesCS5A02G054300	1.12373	6.15255e-18
TraesCS7B02G272500	1.12385	2.99952e-05
TraesCS4D02G076400	1.12397	9.83632e-06
TraesCS5D02G529700	1.12436	7.03407e-37
TraesCS2D02G551600	1.12472	6.42172e-11
TraesCS4A02G230600	1.12497	3.49352e-07
TraesCS3D02G541700	1.1251	8.72061e-05
TraesCS3D02G322700	1.12513	0.00264247
TraesCS1D02G195700	1.1252	8.30426e-11
TraesCS6D02G274800	1.12527	1.25547e-15
TraesCS4A02G230800	1.12533	7.2363e-06
TraesCS5A02G105900	1.12554	4.23489e-28
TraesCS7D02G517400	1.12556	1.09722e-05
TraesCS6A02G360100	1.12588	9.35797e-29
TraesCS7A02G179300	1.12597	3.20627e-08
TraesCS1A02G236500	1.12633	2.61865e-12
TraesCS4D02G012600	1.12653	4.05255e-06
TraesCS5B02G095300	1.12654	0.00639467
TraesCS6B02G229000	1.12657	6.23738e-06
TraesCS4D02G345300	1.12693	0.00154704
TraesCS6B02G025700	1.12698	4.14885e-05
TraesCS7A02G157200	1.12704	2.59091e-30
TraesCS6A02G086800	1.12714	1.8392e-10
TraesCS1D02G059700	1.12729	0.000542227
TraesCS2A02G341500	1.12733	4.47253e-17
TraesCS7A02G178100	1.12741	1.30554e-06
TraesCS2A02G542700	1.12749	2.1995e-20
TraesCS7D02G159300	1.12758	1.80454e-34
TraesCS6A02G365100	1.12759	1.48171e-09
TraesCS4B02G315400	1.12776	0.000205252
TraesCS5D02G219300	1.12786	2.53332e-20
TraesCS5B02G087500	1.12824	2.56784e-21
TraesCS4D02G328900	1.12839	4.2938e-11
TraesCS5A02G557500	1.12844	4.89565e-09
TraesCS2A02G011600	1.12894	0.000303632
TraesCS1A02G159200	1.12912	0.0175954
TraesCS6A02G312400	1.12922	2.16534e-13
TraesCS2A02G036500	1.12933	9.61419e-08
TraesCS3A02G277500	1.12935	4.867e-21
TraesCS3B02G262900	1.12955	4.95314e-10
TraesCS2D02G210100	1.12983	1.53941e-22
TraesCS4A02G165700	1.12992	0.0198359
TraesCS4A02G117200	1.13008	0.0249324
TraesCS1A02G288900	1.1302	6.34474e-12
TraesCS4D02G201200	1.13035	3.82001e-35
TraesCS4A02G058600	1.13037	2.0664e-10
TraesCS7D02G225200	1.13068	1.61571e-22
TraesCS2B02G099700	1.13071	1.26295e-15
TraesCS3B02G306800	1.1312	0.0211744
TraesCS7B02G104500	1.13133	1.38248e-43
TraesCS2A02G593000	1.13135	1.00926e-41
TraesCS2D02G540700	1.13136	4.52078e-06
TraesCS2B02G370400	1.13136	6.91095e-43
TraesCS5D02G338000	1.13139	0.00109427
TraesCS1B02G469200	1.13142	5.86914e-07
TraesCS4B02G120900	1.13148	7.81828e-07
TraesCS2D02G050300	1.13151	2.27311e-62
TraesCS1D02G062800	1.13161	1.42735e-21
TraesCS6B02G345800	1.13184	2.61021e-12
TraesCS1D02G334200	1.13211	3.27424e-27
TraesCS1A02G195400	1.13264	5.69831e-58
TraesCS6D02G214300	1.13267	2.62054e-37
TraesCS6B02G382400	1.13282	4.2872e-17
TraesCS7B02G251900	1.13289	2.56741e-05
TraesCS5D02G465500	1.13305	1.86851e-08
TraesCS6A02G325300	1.13318	3.8733e-15
TraesCS7D02G038700	1.13334	7.43691e-09
TraesCS6B02G317100	1.134	6.89739e-13
TraesCSU02G042500	1.13413	0.0183929
TraesCS7A02G569400	1.13415	0.0157654
TraesCS6B02G389200	1.13423	1.20618e-55
TraesCS7D02G258000	1.13433	7.07231e-07
TraesCS5A02G008300	1.13516	5.71812e-07
TraesCS5D02G209900	1.13519	9.82455e-12
TraesCS4A02G010400	1.13532	0.000121264
TraesCS6A02G253200	1.13546	8.54799e-07
TraesCS2B02G302400	1.13561	1.36709e-39
TraesCS4A02G194500	1.13583	4.34064e-17
TraesCS5D02G160300	1.13591	5.78961e-09
TraesCS5D02G302800	1.1362	1.9776e-56
TraesCS4B02G210300	1.13631	1.83312e-37
TraesCS3B02G001500	1.13676	7.29528e-14
TraesCS7B02G194200	1.13685	3.36525e-05
TraesCS3A02G283200	1.13693	0.00105329
TraesCS6D02G229000	1.13704	1.21757e-14
TraesCS2A02G159700	1.13717	7.75835e-27
TraesCS2D02G031900	1.13722	1.03327e-14
TraesCS3B02G375000	1.13728	9.70546e-35
TraesCS4A02G201000	1.13741	4.1329e-15
TraesCS6A02G287800	1.13762	3.73347e-11
TraesCS1A02G439500	1.13781	1.80307e-24
TraesCS5B02G395700	1.1379	0.000645132
TraesCS1D02G340500	1.13822	1.74702e-19
TraesCS4B02G107900	1.13832	1.69103e-19
TraesCS1D02G051900	1.13832	3.96551e-40
TraesCS2A02G352700	1.13833	0.00979142
TraesCS5B02G190400	1.13846	7.84196e-07
TraesCS2A02G341900	1.13848	7.1976e-13
TraesCS5D02G019800	1.1385	4.24814e-72
TraesCS4D02G286100	1.13859	7.83159e-17
TraesCS3B02G300300	1.13864	2.86287e-11
TraesCS4B02G177100	1.13865	4.09553e-06
TraesCS2A02G513200	1.13873	0.000339933
TraesCS3B02G149100	1.13884	5.20353e-66
TraesCS2A02G338800	1.13915	0.000594467
TraesCS1B02G112200	1.13919	0.000120441
TraesCS7B02G003200	1.13929	3.9923e-47
TraesCS1B02G080700	1.13929	0.000294785
TraesCS1B02G382100	1.13934	6.2851e-05
TraesCS3D02G320600	1.13935	3.0484e-40
TraesCS4B02G039300	1.13937	2.08417e-19
TraesCS6B02G244100	1.13953	8.61985e-13
TraesCS3A02G119100	1.13953	9.90978e-18
TraesCS7D02G248300	1.13955	0.0096239
TraesCS5B02G249300	1.13956	7.40869e-37
TraesCS5B02G555800	1.13968	3.41841e-19
TraesCS5D02G392900	1.13975	4.18638e-23
TraesCS6B02G357000	1.13986	1.89083e-17
TraesCS1D02G382400	1.13986	3.68088e-16
TraesCS3A02G075600	1.13993	2.61958e-20
TraesCS7D02G329500	1.14002	2.22559e-26
TraesCS2D02G441300	1.14018	0.00144055
TraesCS7B02G127300	1.14018	0.000242334
TraesCS3B02G557300	1.14028	0.00105446
TraesCS2B02G362000	1.14037	1.31612e-19
TraesCS7A02G319400	1.14054	0.0253264
TraesCS5A02G194000	1.1406	0.00367013
TraesCS6B02G318900	1.1408	1.63531e-17
TraesCS3A02G156300	1.14088	5.16527e-12
TraesCS1A02G217000	1.14151	0.000189809
TraesCS1A02G296300	1.14168	3.57031e-10
TraesCS7B02G101000	1.14175	1.24267e-18
TraesCS6B02G276200	1.14178	3.51626e-17
TraesCS3D02G290100	1.14217	0.0145993
TraesCS6D02G028800	1.14225	0.00589332
TraesCS5D02G392400	1.14225	1.80909e-24
TraesCS1A02G023800	1.14242	1.83886e-29
TraesCS7B02G085300	1.14285	6.50426e-08
TraesCS3D02G118700	1.14348	0.00011812
TraesCS4B02G057100	1.14358	3.51921e-35
TraesCS2A02G338700	1.14369	1.9438e-05
TraesCS1A02G166200	1.14371	3.85025e-06
TraesCS6B02G214600	1.14394	6.74412e-19
TraesCS1D02G126900	1.14399	6.48261e-11
TraesCS1A02G141300	1.1442	3.80267e-05
TraesCS3B02G356600	1.14453	3.93409e-37
TraesCS6D02G142400	1.14508	9.33725e-17
TraesCS7B02G448600	1.1453	5.76708e-11
TraesCS7A02G490200	1.14547	4.45069e-05
TraesCS5B02G124200	1.14551	5.58562e-12
TraesCS3A02G205700	1.14575	4.15747e-09
TraesCS5B02G222200	1.14579	0.00401156
TraesCS5A02G118300	1.14606	9.05121e-11
TraesCS7D02G378700	1.14612	1.18383e-13
TraesCS3D02G004200	1.14614	0.0191332
TraesCS3D02G237500	1.14624	1.43012e-53
TraesCS2A02G182600	1.14677	8.84581e-52
TraesCS2A02G525000	1.14683	5.50646e-20
TraesCS2D02G285000	1.14707	1.06161e-32
TraesCS4A02G195700	1.14713	1.51112e-39
TraesCS3B02G281500	1.14713	2.37952e-24
TraesCS7D02G217900	1.14727	0.0172866
TraesCS7A02G464700	1.14736	8.38876e-06
TraesCS1B02G117900	1.14744	4.55292e-49
TraesCS6A02G369000	1.14744	7.0361e-08
TraesCS6A02G076900	1.14755	9.14365e-06
TraesCS4D02G306000	1.14765	2.97156e-06
TraesCS4D02G217000	1.14765	3.33235e-20
TraesCS3A02G181800	1.14767	2.44269e-07
TraesCS5A02G125200	1.14768	1.36634e-08
TraesCS1A02G431000	1.14809	0.000415696
TraesCS7B02G375300	1.1481	0.00632632
TraesCS2B02G300800	1.14817	8.48232e-15
TraesCS2D02G328900	1.14869	1.08862e-12
TraesCS5B02G519400	1.14894	1.57739e-06
TraesCS6B02G333100	1.14897	0.00511571
TraesCS6B02G223100	1.14906	7.85659e-28
TraesCS3B02G237000	1.14923	2.42586e-41
TraesCS3A02G172200	1.14924	2.13105e-16
TraesCS5D02G304200	1.14937	0.0021289
TraesCS1B02G451600	1.14975	0.00029345
TraesCS1A02G227300	1.14986	7.45217e-20
TraesCS1D02G417300	1.15008	5.26146e-07
TraesCS1D02G378600	1.15024	1.32656e-10
TraesCS6D02G130000	1.15029	0.000222088
TraesCS5B02G526000	1.15052	0.00614064
TraesCS5D02G364100	1.15088	1.13654e-51
TraesCS3B02G356400	1.15096	4.35549e-13
TraesCS3A02G036000	1.15159	0.0118156
TraesCS6B02G227100	1.15167	4.49599e-07
TraesCS5A02G148900	1.15185	1.03323e-10
TraesCS4B02G085400	1.15193	0.0259538
TraesCS1D02G196900	1.15223	1.3507e-29
TraesCS2D02G063200	1.15224	7.01244e-36
TraesCS1B02G289600	1.15225	1.48221e-17
TraesCS7A02G246700	1.15225	1.85905e-14
TraesCS2D02G205700	1.1524	4.28171e-09
TraesCS3A02G419700	1.15245	3.49357e-05
TraesCS1A02G079700	1.15256	1.41399e-35
TraesCS2A02G158900	1.15257	1.04703e-09
TraesCS6B02G177600	1.15262	1.00425e-10
TraesCS4B02G216300	1.15317	3.10266e-14
TraesCS7D02G378400	1.15324	2.94199e-08
TraesCS7D02G362200	1.15332	5.88391e-13
TraesCS7B02G167100	1.15332	0.0158369
TraesCS7D02G458300	1.15336	1.31637e-19
TraesCS3D02G210100	1.15358	1.37314e-24
TraesCS5B02G114500	1.15358	3.11234e-12
TraesCS2B02G361800	1.15387	1.24413e-14
TraesCS1B02G099900	1.15398	0.0206695
TraesCS5D02G195700	1.15402	2.68838e-10
TraesCS1D02G122500	1.15417	7.9428e-18
TraesCS4B02G216400	1.15454	6.49204e-06
TraesCS2D02G220400	1.15459	3.85074e-64
TraesCS6B02G151700	1.15464	7.95312e-16
TraesCS3A02G176500	1.15467	6.08576e-20
TraesCS7D02G149800	1.15484	1.03239e-36
TraesCS6A02G108900	1.15484	4.33864e-12
TraesCS3A02G206100	1.15509	1.69014e-19
TraesCS5A02G447400	1.15532	0.000647049
TraesCS2A02G380700	1.15537	3.45334e-11
TraesCS2A02G163000	1.15544	4.36185e-32
TraesCS6B02G050400	1.15547	0.0170889
TraesCS6B02G338200	1.15557	5.55886e-52
TraesCS4A02G276800	1.15569	2.00527e-12
TraesCS7A02G251100	1.15589	6.45518e-07
TraesCS3B02G203000	1.15605	2.58834e-16
TraesCS4D02G024900	1.15605	1.49429e-08
TraesCS1A02G087900	1.15607	1.13351e-17
TraesCS3A02G147900	1.1561	3.70438e-12
TraesCS5B02G263700	1.15627	2.66821e-23
TraesCS7B02G169500	1.15644	2.3637e-43
TraesCS2A02G401400	1.15659	1.55928e-27
TraesCS2A02G367800	1.1566	0.000293244
TraesCS6A02G167300	1.15683	2.34148e-49
TraesCS1A02G320900	1.15699	2.77234e-12
TraesCS1A02G441800	1.15716	1.25318e-18
TraesCS2D02G039600	1.15738	5.16112e-47
TraesCS2D02G368100	1.15741	4.5682e-09
TraesCS6B02G415900	1.15743	0.00378457
TraesCS3D02G424400	1.15758	6.61058e-15
TraesCS3A02G284800	1.15759	7.85405e-16
TraesCS7D02G203100	1.15771	0.000657093
TraesCS4D02G247100	1.15791	1.33599e-21
TraesCS3B02G144300	1.15819	0.0167369
TraesCS6B02G338100	1.15828	5.8183e-40
TraesCS2D02G250000	1.15833	1.77428e-27
TraesCS4A02G245500	1.15855	1.30782e-11
TraesCS4B02G318200	1.15861	1.17108e-18
TraesCS1D02G055600	1.15862	7.61205e-11
TraesCS3A02G134900	1.15865	0.0183379
TraesCS3D02G219600	1.15886	1.20391e-19
TraesCS3D02G492500	1.1589	4.15765e-13
TraesCS5D02G520200	1.15903	2.60107e-20
TraesCS3B02G368000	1.15907	4.55907e-18
TraesCS1B02G361000	1.15928	0.0175535
TraesCS1A02G236600	1.15938	3.33082e-16
TraesCS7D02G348000	1.1594	1.79995e-19
TraesCS5D02G495900	1.15974	0.00722154
TraesCS6A02G349000	1.15982	1.65948e-24
TraesCS3D02G265100	1.15987	0.00264143
TraesCS7B02G335000	1.1599	0.00045302
TraesCS2B02G123700	1.15996	1.0342e-18
TraesCS3B02G414500	1.16004	9.23864e-19
TraesCS3A02G459100	1.1606	4.50832e-23
TraesCS3B02G311900	1.16073	5.44735e-09
TraesCS5A02G259200	1.16087	6.35681e-12
TraesCS4D02G067600	1.16092	4.27602e-16
TraesCS6B02G406300	1.16153	1.40412e-27
TraesCS3D02G206600	1.16175	2.08306e-56
TraesCS3A02G221700	1.16206	1.47264e-23
TraesCS5B02G492500	1.1621	4.04096e-114
TraesCS2D02G401700	1.16219	0.000134878
TraesCS6A02G362000	1.16229	8.99319e-17
TraesCS7D02G041500	1.16232	1.01021e-32
TraesCS4A02G305400	1.1624	1.80265e-41
TraesCS4D02G304400	1.16244	3.66953e-23
TraesCS5B02G291700	1.16271	0.0136325
TraesCS2A02G518700	1.16287	3.10569e-16
TraesCS5B02G078700	1.16287	0.000105822
TraesCS1A02G115500	1.16296	1.0566e-16
TraesCS5A02G285300	1.16297	1.11292e-23
TraesCS5B02G009200	1.16303	0.00336524
TraesCS3B02G045900	1.16306	0.000312342
TraesCS7A02G107100	1.16309	1.09781e-20
TraesCS1D02G451000	1.16323	0.000923009
TraesCS2B02G382900	1.16327	1.07603e-07
TraesCS2B02G187300	1.16349	2.22424e-49
TraesCS7D02G321100	1.16377	3.85818e-07
TraesCS7A02G440500	1.16384	9.29438e-32
TraesCS1D02G185900	1.16394	0.000272634
TraesCS4B02G175400	1.16401	0.00762055
TraesCS1B02G425600	1.16425	2.63806e-29
TraesCS7A02G054900	1.16429	2.85921e-31
TraesCS7B02G241900	1.16441	3.90433e-19
TraesCS7B02G312200	1.16449	3.55964e-08
TraesCS2B02G337300	1.16459	0.00199642
TraesCS4B02G237500	1.16468	5.66106e-07
TraesCS3B02G253700	1.16478	4.98047e-33
TraesCS7D02G366700	1.16483	7.03302e-19
TraesCS2D02G543900	1.16494	7.98923e-15
TraesCS4B02G251600	1.16514	8.78135e-25
TraesCS1D02G345100	1.16527	2.27169e-12
TraesCS4B02G056600	1.16533	0.000245495
TraesCS1A02G025700	1.1655	0.00114942
TraesCS3D02G510000	1.16555	1.61007e-14
TraesCS3A02G146300	1.1657	1.64284e-08
TraesCS4A02G115100	1.16583	2.21896e-11
TraesCS1A02G105600	1.16589	1.99465e-48
TraesCS7A02G193200	1.16591	1.75087e-13
TraesCS7B02G001500	1.16596	5.72187e-25
TraesCS7D02G266300	1.16652	3.32754e-33
TraesCS6A02G309200	1.16655	3.62311e-47
TraesCS5A02G269200	1.16659	0.000417105
TraesCS7A02G557600	1.16686	4.73117e-11
TraesCS5B02G562100	1.16694	4.39524e-23
TraesCS7A02G301900	1.16732	2.64642e-43
TraesCS5B02G505200	1.16746	3.12769e-10
TraesCS3B02G353000	1.1676	2.19154e-09
TraesCS5D02G280500	1.16771	9.95026e-20
TraesCS7B02G247700	1.16776	8.3009e-05
TraesCS7A02G539800	1.16829	2.1864e-20
TraesCS7B02G131100	1.16841	2.99118e-22
TraesCS2A02G336600	1.1691	1.38741e-08
TraesCS2A02G545100	1.16915	4.29627e-22
TraesCS2B02G462700	1.16921	0.0100987
TraesCS3D02G334200	1.16928	5.34164e-10
TraesCS4B02G201500	1.16967	7.24436e-40
TraesCS5D02G267000	1.16974	1.63991e-28
TraesCS5A02G178400	1.16979	3.44612e-19
TraesCS5B02G156800	1.1698	1.05894e-20
TraesCS1D02G204000	1.16989	0.0188858
TraesCS7A02G070800	1.1701	9.49739e-08
TraesCS5B02G352900	1.1701	1.26787e-11
TraesCS4B02G197600	1.17016	3.02044e-26
TraesCS7B02G272800	1.1702	2.42102e-21
TraesCS3B02G390100	1.17045	1.14038e-14
TraesCS7D02G382100	1.17062	4.35374e-10
TraesCS4A02G209700	1.17071	0.00426708
TraesCS4B02G042400	1.17076	5.43407e-09
TraesCS7B02G092200	1.17121	1.93776e-05
TraesCS5A02G213100	1.17126	5.06177e-11
TraesCS7A02G297200	1.17133	0.00130117
TraesCS3B02G582400	1.17134	1.36509e-45
TraesCS4D02G013100	1.17149	2.47363e-08
TraesCS7B02G458700	1.17152	3.86843e-05
TraesCS7D02G223300	1.17155	4.24102e-08
TraesCS3A02G157200	1.17164	0.000300822
TraesCS2A02G327000	1.17198	5.3967e-23
TraesCS1D02G034600	1.17215	9.18236e-13
TraesCS6B02G001900	1.17235	0.000111583
TraesCS5A02G246800	1.17265	0.00352933
TraesCS5D02G177500	1.17277	5.37465e-44
TraesCS5B02G198000	1.17278	1.05003e-38
TraesCS5D02G413700	1.17299	5.72377e-34
TraesCS7D02G444300	1.17303	0.000415027
TraesCS6A02G336500	1.1731	2.86858e-31
TraesCS5B02G275700	1.17325	1.61013e-10
TraesCS1B02G207100	1.17339	0.000103577
TraesCS6D02G220700	1.17342	6.94877e-06
TraesCS2B02G378700	1.17363	0.00155337
TraesCS6B02G371800	1.17372	1.83455e-27
TraesCS2D02G429400	1.17376	1.02956e-17
TraesCS5D02G493700	1.17391	1.72798e-09
TraesCS2D02G453500	1.17411	0.000664487
TraesCS1A02G194500	1.17426	0.0019614
TraesCS5B02G139300	1.17438	9.84193e-05
TraesCS5D02G456200	1.17439	0.00017773
TraesCS2D02G356500	1.17471	3.27993e-67
TraesCS6D02G144300	1.17486	1.79233e-06
TraesCS1A02G164000	1.17498	3.9205e-31
TraesCS3B02G208100	1.17506	3.36143e-37
TraesCS3D02G322900	1.1755	0.000153291
TraesCS3D02G457400	1.17566	4.03187e-41
TraesCS2A02G389000	1.17583	4.45854e-24
TraesCS3B02G331100	1.17598	1.07595e-45
TraesCS7D02G078700	1.17611	2.27221e-05
TraesCS2A02G229000	1.1763	6.89916e-05
TraesCS5A02G466300	1.17631	0.0019885
TraesCS1D02G251100	1.17636	3.59487e-58
TraesCS1A02G069500	1.17642	0.0247774
TraesCS4D02G301500	1.17644	8.27214e-22
TraesCS7D02G238000	1.17647	4.68459e-13
TraesCS2D02G269800	1.17667	2.27662e-25
TraesCS5D02G400900	1.17694	2.72227e-41
TraesCS4B02G265600	1.177	2.44676e-10
TraesCS7D02G200200	1.17734	0.000343696
TraesCS2D02G359800	1.17734	0.000115661
TraesCS3B02G181000	1.17755	3.6282e-07
TraesCS7B02G416100	1.17762	8.68758e-20
TraesCS3D02G438700	1.17833	0.023238
TraesCS4A02G083200	1.17837	1.20525e-05
TraesCS7D02G071200	1.17839	0.0109409
TraesCS1B02G429400	1.17839	0.00260444
TraesCS6B02G140100	1.17851	1.20824e-06
TraesCS6B02G359700	1.17884	0.00589492
TraesCS4D02G095100	1.17943	6.95261e-25
TraesCS5A02G299300	1.17955	9.99602e-20
TraesCS2D02G327100	1.17959	1.02551e-33
TraesCS1B02G181000	1.17964	1.6617e-26
TraesCS5B02G190200	1.17969	0.0109172
TraesCS1A02G096600	1.17989	5.38149e-16
TraesCS6B02G307800	1.1799	2.12468e-06
TraesCS3B02G213500	1.17997	2.39345e-44
TraesCS4D02G125100	1.17999	1.4336e-58
TraesCS5B02G170600	1.18004	0.00676881
TraesCS2A02G478600	1.1801	4.22083e-10
TraesCS5D02G399200	1.18011	2.31648e-10
TraesCS6A02G298800	1.18021	6.67959e-10
TraesCS2D02G489200	1.18028	6.37936e-97
TraesCS1D02G164500	1.18072	1.36431e-23
TraesCS5B02G160100	1.18095	2.75488e-57
TraesCS4A02G086000	1.18106	1.20698e-06
TraesCS1D02G165400	1.18107	1.97085e-39
TraesCS5D02G141300	1.18109	3.45766e-51
TraesCS7D02G284600	1.18119	1.288e-36
TraesCS2B02G137100	1.18138	8.82019e-16
TraesCS7D02G066600	1.18152	5.70497e-32
TraesCS2A02G388300	1.18187	6.31054e-17
TraesCS5D02G488500	1.18188	0.00604018
TraesCS2A02G161400	1.18196	9.63447e-21
TraesCS6B02G272700	1.18233	1.00712e-32
TraesCS7B02G095100	1.18233	2.76254e-10
TraesCS3D02G388100	1.1825	1.47328e-24
TraesCS1B02G211800	1.18273	3.90572e-26
TraesCS4D02G350300	1.18275	9.1762e-25
TraesCS6B02G332100	1.18278	0.000184042
TraesCS7D02G289200	1.18282	7.06547e-44
TraesCSU02G081200	1.18286	0.000469516
TraesCS6B02G385100	1.18287	4.58456e-06
TraesCS3A02G247400	1.18294	6.66133e-14
TraesCS7A02G321700	1.18316	8.92652e-13
TraesCS3A02G194800	1.1832	5.02936e-11
TraesCS2A02G375200	1.18331	1.0548e-10
TraesCS6A02G157700	1.18336	3.70748e-08
TraesCS7A02G357100	1.18359	2.21321e-48
TraesCS7B02G155800	1.18364	8.49228e-24
TraesCS4A02G355700	1.18364	0.0108993
TraesCS1B02G307500	1.18379	1.13221e-08
TraesCS5D02G182200	1.18388	0.000154388
TraesCSU02G053700	1.18394	1.35213e-36
TraesCS7D02G191100	1.18397	1.44298e-16
TraesCS3B02G497900	1.184	0.000847208
TraesCS6D02G265300	1.18413	1.92422e-07
TraesCS3D02G359700	1.18417	0.00139748
TraesCS2A02G488800	1.18419	0.000248917
TraesCS2B02G363400	1.18434	0.0109942
TraesCS2B02G339200	1.18436	6.80425e-26
TraesCS1D02G352000	1.18459	4.37496e-15
TraesCS2A02G085000	1.18461	1.11856e-19
TraesCS7D02G472700	1.18472	0.00713816
TraesCS6D02G219400	1.18481	3.4301e-08
TraesCS2B02G181100	1.18486	1.57194e-05
TraesCS7B02G357300	1.18487	0.0232745
TraesCS7A02G148600	1.18496	3.87296e-06
TraesCS7A02G453300	1.18499	2.44763e-44
TraesCS2B02G062500	1.18511	2.24329e-09
TraesCS5D02G093800	1.18513	0.00689353
TraesCS4A02G341700	1.18513	5.21648e-35
TraesCS2A02G184400	1.18529	3.44504e-27
TraesCS4B02G102300	1.18529	1.32309e-05
TraesCS6B02G174900	1.18537	1.35251e-22
TraesCS1A02G121000	1.18548	5.12898e-35
TraesCS5B02G559100	1.18553	7.74508e-30
TraesCS4B02G207800	1.18565	4.24533e-62
TraesCS3D02G126500	1.18566	4.3507e-21
TraesCS1A02G193200	1.18572	7.20916e-32
TraesCS3B02G281100	1.18578	2.81954e-55
TraesCS4A02G494100	1.18587	0.00922356
TraesCS6B02G253900	1.18594	3.56943e-05
TraesCS2B02G524100	1.18608	1.20021e-45
TraesCS3B02G168700	1.1863	0.00167886
TraesCS4A02G230700	1.18631	5.697e-16
TraesCS7B02G112500	1.18633	1.56389e-30
TraesCS6A02G373300	1.18658	0.0197978
TraesCS7D02G449300	1.18685	3.05231e-59
TraesCS7A02G303400	1.18722	6.85558e-17
TraesCS5B02G385000	1.18728	8.40349e-08
TraesCS4B02G078400	1.18737	0.000393751
TraesCS5D02G202900	1.18756	2.2873e-05
TraesCS7D02G224800	1.18767	7.36478e-41
TraesCS4B02G213400	1.18767	5.32812e-64
TraesCS6D02G062900	1.18784	1.16041e-10
TraesCS2B02G291300	1.18815	4.53849e-15
TraesCS3B02G226800	1.18819	0.0018256
TraesCS5B02G170400	1.18835	6.41713e-44
TraesCS6A02G237700	1.18844	0.0161934
TraesCS6A02G255700	1.18866	4.72611e-14
TraesCS6B02G230400	1.18871	8.80973e-53
TraesCS7B02G034600	1.18878	4.87502e-21
TraesCS3D02G320300	1.18929	2.49511e-07
TraesCS7B02G436500	1.18966	6.9035e-37
TraesCS5D02G398700	1.18978	0.0113606
TraesCS1A02G116800	1.18979	0.0258448
TraesCS7B02G283800	1.18981	2.14616e-06
TraesCS7D02G328200	1.18998	0.00144243
TraesCS5A02G325400	1.19005	1.9663e-25
TraesCS3B02G610500	1.19006	4.71719e-06
TraesCS5D02G244900	1.19015	5.55746e-13
TraesCS5D02G366000	1.19038	3.11363e-14
TraesCS5A02G272500	1.1904	8.7009e-22
TraesCS3A02G139000	1.19053	2.06747e-14
TraesCS3D02G192600	1.19065	1.92882e-05
TraesCS4A02G169200	1.19093	6.21014e-27
TraesCS7B02G350000	1.19098	0.0061986
TraesCS1D02G405300	1.191	1.60768e-33
TraesCS7B02G423800	1.19117	4.21298e-09
TraesCS6B02G157700	1.19133	0.00168538
TraesCS6A02G394700	1.19155	0.00826025
TraesCS7A02G130600	1.19177	1.81716e-05
TraesCS6B02G248300	1.19181	8.03553e-55
TraesCS1B02G342600	1.19188	4.9418e-24
TraesCS5A02G103000	1.19191	7.26389e-05
TraesCS1D02G123200	1.19202	1.12687e-22
TraesCS2B02G190400	1.19212	9.39535e-15
TraesCS6D02G081700	1.19228	0.000169959
TraesCS7A02G205300	1.19275	3.66836e-32
TraesCS7D02G325900	1.19278	5.49542e-06
TraesCS1B02G357700	1.19283	0.0192965
TraesCS2B02G047200	1.19327	1.79275e-11
TraesCS5D02G346800	1.19341	6.15155e-06
TraesCS3B02G274000	1.19349	3.24715e-26
TraesCS1A02G424800	1.19356	0.00375379
TraesCS1B02G423500	1.19381	2.73367e-71
TraesCS5D02G021600	1.194	3.74203e-50
TraesCS5D02G492900	1.19431	2.18777e-105
TraesCS1A02G355200	1.19436	6.40628e-28
TraesCS3D02G167100	1.19444	2.43389e-11
TraesCS4A02G341600	1.19446	3.53706e-17
TraesCS6A02G102200	1.19451	8.11066e-08
TraesCS5A02G087300	1.19465	3.80896e-15
TraesCS4A02G284600	1.19495	3.93837e-05
TraesCS5A02G167500	1.19503	2.80878e-34
TraesCS4A02G174700	1.19521	5.98666e-28
TraesCS4D02G000900	1.19523	9.19455e-13
TraesCS5B02G239600	1.19529	7.617e-07
TraesCS6A02G326400	1.19538	1.07945e-16
TraesCS7D02G133100	1.19544	1.08394e-05
TraesCS5B02G376200	1.19548	2.55214e-47
TraesCS5D02G564000	1.19558	1.36337e-08
TraesCS1B02G324300	1.1956	1.52092e-28
TraesCS3B02G469000	1.19578	1.73569e-47
TraesCS7B02G061200	1.19609	1.88815e-22
TraesCS4A02G016000	1.19625	0.000509487
TraesCS6B02G115100	1.19629	4.27554e-19
TraesCS1A02G315600	1.19635	5.21682e-09
TraesCS1B02G095200	1.19636	1.68488e-33
TraesCS3A02G148200	1.19653	0.0225049
TraesCS3A02G110300	1.19655	1.43733e-09
TraesCS3A02G073400	1.19668	3.94091e-47
TraesCS2A02G191000	1.197	1.23663e-38
TraesCS6A02G065900	1.19712	0.00253151
TraesCS1B02G323100	1.19724	0.00850377
TraesCS7B02G362900	1.19726	1.84362e-22
TraesCS2D02G289500	1.1974	1.18598e-29
TraesCS4D02G256400	1.19761	0.00162595
TraesCS2A02G564000	1.19762	1.13385e-31
TraesCS6B02G163100	1.19763	6.23403e-20
TraesCS3D02G360400	1.19768	3.78583e-26
TraesCS6A02G013800	1.19787	0.0212401
TraesCS5A02G449600	1.19797	0.000311837
TraesCS4B02G265700	1.19802	9.12794e-30
TraesCS7D02G500000	1.19803	0.000356138
TraesCS5D02G503500	1.19806	6.60218e-38
TraesCS2B02G313800	1.19816	0.0137054
TraesCS3A02G158600	1.19827	1.14309e-18
TraesCS6B02G421700	1.1983	6.66067e-20
TraesCS4B02G223600	1.19863	3.06301e-40
TraesCS3A02G136100	1.19872	3.06501e-48
TraesCS2B02G196300	1.19879	4.02022e-12
TraesCS2A02G317200	1.19888	2.53652e-14
TraesCS6A02G253900	1.19903	4.89681e-22
TraesCS6B02G410900	1.19904	8.84063e-33
TraesCS6D02G165700	1.19914	3.06946e-34
TraesCS1A02G265000	1.19919	1.45128e-17
TraesCS7B02G134600	1.19935	1.0198e-10
TraesCS2B02G035200	1.19935	0.00057741
TraesCS7A02G092300	1.19936	1.34602e-64
TraesCS4B02G058400	1.19947	3.65315e-11
TraesCSU02G067000	1.1995	3.36666e-11
TraesCS7D02G157700	1.19961	6.54032e-26
TraesCS4A02G183100	1.19964	0.000703815
TraesCS7B02G354500	1.19967	2.49252e-10
TraesCS3A02G119000	1.19968	1.73455e-29
TraesCS3B02G415500	1.19969	3.63302e-29
TraesCS6B02G266500	1.1997	5.29519e-05
TraesCS1B02G350600	1.19974	9.12385e-16
TraesCS2A02G001100	1.1999	2.94901e-14
TraesCS3D02G400000	1.20005	1.06982e-14
TraesCS3A02G448800	1.2001	1.676e-17
TraesCS2D02G378200	1.2001	2.3784e-07
TraesCS2D02G192000	1.20018	2.03638e-19
TraesCS7D02G190000	1.20018	4.94611e-11
TraesCS7D02G179700	1.20031	9.11902e-19
TraesCS6B02G450700	1.20048	6.54037e-14
TraesCS6B02G339000	1.20068	6.88481e-15
TraesCS7B02G288400	1.20077	8.51457e-10
TraesCS7A02G205400	1.20086	0.00268586
TraesCS4D02G336500	1.20102	5.03339e-21
TraesCS4A02G109300	1.20108	1.59598e-24
TraesCS5A02G177200	1.2012	0.000484054
TraesCS6B02G425900	1.2017	2.12688e-10
TraesCS1A02G089100	1.20174	2.93492e-20
TraesCS3B02G281000	1.20188	1.35551e-22
TraesCS7B02G443500	1.20222	3.50941e-23
TraesCS1B02G480400	1.20224	2.22351e-13
TraesCS6B02G317200	1.20265	3.44536e-09
TraesCS7A02G436600	1.20285	3.90506e-05
TraesCS5D02G014100	1.20293	9.39248e-06
TraesCS7D02G264600	1.20305	1.06685e-05
TraesCS2A02G397300	1.20308	7.06046e-14
TraesCS4D02G048300	1.2032	0.000291639
TraesCS5D02G039200	1.2032	2.4474e-06
TraesCS3D02G226500	1.20362	2.79187e-32
TraesCS1A02G409900	1.20374	2.3702e-12
TraesCS4A02G193600	1.20395	2.4068e-11
TraesCS2B02G610300	1.20396	1.04624e-11
TraesCS5B02G560600	1.20406	0.0021518
TraesCS5B02G222600	1.20426	0.000250367
TraesCS6D02G180400	1.20436	7.37005e-15
TraesCS3A02G261800	1.20439	0.000426459
TraesCS4B02G037900	1.20446	1.45108e-66
TraesCS6B02G412400	1.20456	9.51736e-19
TraesCS2A02G248500	1.20458	6.7529e-13
TraesCS4A02G401700	1.2046	2.5717e-34
TraesCS5A02G107600	1.20475	2.03032e-16
TraesCS7A02G520400	1.20488	0.0175795
TraesCS1D02G094700	1.20493	5.13582e-06
TraesCS1D02G139100	1.20495	5.88732e-25
TraesCS6A02G342800	1.20501	2.60421e-27
TraesCS1B02G281600	1.20503	0.00149957
TraesCS4A02G085000	1.20514	0.00135689
TraesCS1B02G289700	1.20529	2.53526e-18
TraesCS4B02G186900	1.20561	0.00604517
TraesCS2B02G340400	1.20567	4.69491e-06
TraesCS6D02G153400	1.20619	4.03251e-45
TraesCS3D02G239900	1.20629	0.0248657
TraesCS4D02G068200	1.20636	4.23399e-12
TraesCS6A02G138900	1.20638	0.00629597
TraesCS1A02G441400	1.2064	2.00632e-12
TraesCS7D02G450800	1.20649	0.000154672
TraesCS4B02G162100	1.20667	1.71032e-05
TraesCS1B02G060700	1.20676	1.05535e-31
TraesCS7D02G013900	1.20677	3.47055e-09
TraesCS1B02G366400	1.20715	1.03424e-31
TraesCS5B02G265200	1.20734	0.0155794
TraesCS1B02G148100	1.20755	7.37701e-27
TraesCS1D02G305100	1.20773	6.71871e-11
TraesCS6A02G144800	1.20784	1.85236e-48
TraesCS3D02G442100	1.20795	3.41476e-24
TraesCS1D02G251800	1.20796	0.0233222
TraesCS7B02G137900	1.20799	0.0112585
TraesCS7D02G257900	1.20799	0.000659186
TraesCS7B02G276800	1.20802	0.00873745
TraesCS7D02G391600	1.20822	0.00357003
TraesCS6A02G069500	1.20831	1.64816e-08
TraesCS7D02G342100	1.20833	0.0138211
TraesCS5A02G403300	1.20842	7.34898e-42
TraesCS6A02G373500	1.20859	0.000306166
TraesCS5B02G368500	1.20867	2.47448e-20
TraesCS5D02G404000	1.20873	0.0136824
TraesCS2D02G205800	1.20877	1.4524e-53
TraesCS7A02G184600	1.20898	2.04133e-08
TraesCS3A02G276500	1.20898	1.04312e-35
TraesCS5A02G236400	1.20901	1.34503e-20
TraesCS2D02G001400	1.20907	2.27515e-24
TraesCS3D02G293300	1.20954	2.25138e-07
TraesCS5D02G338500	1.20961	0.00188648
TraesCS4D02G303400	1.20971	9.03525e-14
TraesCS2A02G431400	1.21003	2.61385e-19
TraesCS5B02G449500	1.2101	2.80997e-05
TraesCS1B02G345300	1.21013	5.29028e-26
TraesCS3B02G050300	1.21017	0.000184464
TraesCSU02G131900	1.21019	3.36627e-06
TraesCS5A02G085900	1.21033	1.71704e-40
TraesCS5A02G409100	1.21061	1.69349e-17
TraesCS5B02G495800	1.21063	1.8723e-08
TraesCS5B02G229100	1.21076	0.000412335
TraesCS2D02G525900	1.21111	8.13647e-27
TraesCS3A02G150400	1.21112	0.00648553
TraesCS2D02G496000	1.21119	9.29399e-07
TraesCS3D02G230800	1.21121	3.07238e-27
TraesCS1B02G008000	1.21125	2.72343e-49
TraesCS3B02G599500	1.21128	0.00957074
TraesCS6D02G105000	1.21139	7.63276e-39
TraesCS6A02G121400	1.21151	2.12479e-14
TraesCS3D02G207800	1.21154	0.00925958
TraesCS1A02G194600	1.21174	0.00117656
TraesCS2B02G327500	1.21177	1.50655e-18
TraesCS6D02G365200	1.21182	2.14081e-12
TraesCS4A02G272900	1.21218	2.71541e-49
TraesCS7B02G098200	1.21225	0.00026374
TraesCS2A02G453400	1.21228	4.6466e-26
TraesCS5D02G288100	1.2125	2.15607e-06
TraesCS5D02G565200	1.21255	4.9612e-36
TraesCS7A02G419400	1.21255	7.37593e-77
TraesCS2D02G006200	1.21266	0.000558624
TraesCS2A02G407300	1.21271	0.0255363
TraesCS7D02G428200	1.21276	0.0258669
TraesCS7A02G318200	1.21277	2.06301e-05
TraesCS1A02G262600	1.21278	2.61421e-17
TraesCS5D02G231500	1.21297	7.71933e-13
TraesCS5A02G163300	1.21311	5.1939e-15
TraesCS6B02G379500	1.21314	2.9808e-14
TraesCS6A02G210600	1.21326	1.60525e-20
TraesCS5B02G011400	1.21332	1.22144e-05
TraesCS2B02G257100	1.21338	6.71561e-18
TraesCS1B02G324000	1.21347	0.00672735
TraesCS1D02G126300	1.21354	1.66768e-25
TraesCS6A02G318800	1.21369	0.0182496
TraesCS6A02G229900	1.2137	8.21969e-08
TraesCS5B02G184700	1.21417	9.56799e-42
TraesCS2D02G307500	1.21418	8.0081e-19
TraesCS4D02G145100	1.21425	2.83696e-54
TraesCS3D02G124100	1.21439	1.05541e-37
TraesCS3D02G219500	1.21456	1.71716e-28
TraesCS5B02G297300	1.2146	2.14297e-20
TraesCS4B02G139700	1.21461	3.47477e-46
TraesCS6B02G137500	1.21494	1.08302e-15
TraesCS6A02G151100	1.21494	0.0246195
TraesCS2A02G538500	1.21536	1.02723e-12
TraesCS7D02G304100	1.21568	2.36287e-07
TraesCS1B02G258700	1.21597	4.49677e-09
TraesCS4B02G049100	1.21623	1.14523e-07
TraesCS5A02G538100	1.21629	4.75288e-09
TraesCS5A02G355200	1.21634	0.00305858
TraesCS3A02G310200	1.21642	6.64085e-18
TraesCS7D02G365100	1.21653	3.36532e-08
TraesCS1D02G072800	1.2168	5.90432e-06
TraesCS1B02G089700	1.21703	1.53662e-08
TraesCS4A02G151500	1.21757	9.52973e-17
TraesCS5D02G409900	1.21768	1.11281e-05
TraesCS1D02G273100	1.21775	6.82356e-12
TraesCS2A02G324000	1.21801	0.00765222
TraesCS2B02G013500	1.21815	0.000503569
TraesCS1A02G288600	1.21818	2.16057e-28
TraesCS5D02G062900	1.21833	2.38432e-40
TraesCS5A02G409000	1.21875	0.00364119
TraesCS6A02G298900	1.21914	6.1026e-07
TraesCS7B02G162500	1.21915	1.63556e-18
TraesCS4D02G276400	1.2192	1.25387e-67
TraesCS5B02G240700	1.21925	3.80707e-05
TraesCS1D02G317000	1.21933	1.67941e-11
TraesCS4B02G398400	1.21962	1.32055e-33
TraesCS1B02G411900	1.21973	6.24757e-09
TraesCS3A02G120100	1.21976	1.90366e-05
TraesCS2D02G000500	1.21977	7.57032e-19
TraesCS6D02G407400	1.21986	1.59601e-18
TraesCS7A02G164100	1.21988	0.0102439
TraesCS3A02G338800	1.21999	4.55289e-05
TraesCS3A02G275100	1.22009	1.18979e-27
TraesCS5B02G196300	1.22024	1.15586e-06
TraesCS5B02G437100	1.2205	1.62217e-19
TraesCS3B02G038900	1.22062	0.00223622
TraesCS5B02G313000	1.22064	0.0258093
TraesCS4B02G216700	1.22067	1.37875e-23
TraesCS3A02G109100	1.22071	5.19701e-05
TraesCS2D02G520100	1.22075	1.26305e-14
TraesCS2B02G193500	1.22077	4.77601e-18
TraesCS6A02G301800	1.22097	0.00328113
TraesCS4D02G143400	1.22115	3.85431e-23
TraesCS7B02G323100	1.22124	1.06978e-22
TraesCS6D02G349300	1.22171	0.00738889
TraesCS5B02G464600	1.22172	5.84316e-35
TraesCS3A02G021900	1.22181	6.92001e-08
TraesCS1B02G224500	1.22213	0.00090965
TraesCS7B02G247100	1.2223	3.97334e-22
TraesCS3D02G212800	1.22233	6.83134e-16
TraesCS5D02G032500	1.22252	0.0204633
TraesCS6A02G214100	1.22256	3.34905e-16
TraesCS1A02G296100	1.22257	1.62972e-12
TraesCS5D02G021100	1.22267	0.000223464
TraesCS4B02G317300	1.22282	2.68848e-21
TraesCS7B02G328400	1.22291	1.42145e-29
TraesCS6D02G364100	1.22295	0.00517652
TraesCS6B02G208400	1.22315	1.14838e-07
TraesCS7B02G137000	1.22316	9.39279e-28
TraesCS7B02G006700	1.22322	7.22328e-07
TraesCS4D02G230400	1.22349	4.79439e-13
TraesCS1A02G292000	1.22358	0.000240408
TraesCS3A02G086900	1.22372	9.88694e-12
TraesCS1B02G408600	1.22373	1.52037e-12
TraesCS5B02G022300	1.22374	6.16177e-21
TraesCS7A02G177900	1.22376	4.36633e-21
TraesCS2A02G169300	1.22407	1.49302e-53
TraesCS1B02G258300	1.22431	1.24071e-16
TraesCS6B02G118100	1.22457	2.18273e-07
TraesCS5A02G392800	1.2246	1.01408e-07
TraesCS3B02G292600	1.22463	0.00721361
TraesCS1B02G205400	1.22489	1.1503e-08
TraesCS2B02G390500	1.22491	0.000441876
TraesCS4A02G089800	1.22492	2.95177e-17
TraesCS7B02G218000	1.22499	2.87585e-34
TraesCS4A02G048000	1.22502	9.75155e-13
TraesCS2A02G404600	1.22511	0.00205701
TraesCS7D02G015100	1.22512	0.000112488
TraesCS3A02G307900	1.22513	4.38069e-25
TraesCS6A02G265100	1.22515	2.45295e-07
TraesCS6B02G305400	1.22528	2.22137e-24
TraesCS5B02G383700	1.22531	4.13873e-06
TraesCS6D02G144900	1.22539	3.54598e-06
TraesCS2A02G115400	1.22554	6.82766e-11
TraesCS4B02G170000	1.22562	3.76293e-59
TraesCS6B02G097800	1.22574	0.015889
TraesCS5B02G212100	1.22591	2.27723e-24
TraesCS4A02G039700	1.22594	0.00152141
TraesCS2B02G373600	1.22601	2.09771e-54
TraesCS6B02G376500	1.22604	3.81847e-40
TraesCS5A02G317000	1.22628	0.000456869
TraesCS2A02G411200	1.22632	1.09382e-13
TraesCS3D02G412300	1.22653	1.7359e-18
TraesCS6A02G306400	1.22662	2.10629e-10
TraesCS7D02G307000	1.2267	6.34006e-15
TraesCS1A02G109200	1.22683	1.44939e-17
TraesCS4B02G273000	1.22692	0.00305377
TraesCS4A02G002100	1.22705	8.27708e-17
TraesCS2B02G083900	1.22723	3.61722e-07
TraesCS1D02G185000	1.22748	2.85851e-24
TraesCS6D02G288500	1.22755	1.85498e-49
TraesCS2A02G317700	1.22774	4.31327e-48
TraesCS6A02G087700	1.22786	3.28224e-11
TraesCS7A02G322800	1.22801	8.59021e-16
TraesCS3A02G184300	1.22806	2.44152e-15
TraesCS4B02G367200	1.22859	2.5375e-86
TraesCS7A02G429300	1.22866	0.0132799
TraesCS6B02G387900	1.22868	0.000322558
TraesCS4B02G067800	1.22886	3.34181e-15
TraesCS7D02G419300	1.22901	1.28311e-44
TraesCS6A02G240200	1.22945	8.21911e-07
TraesCS5A02G143600	1.22956	1.15821e-15
TraesCS4B02G356600	1.2296	7.24587e-25
TraesCS7A02G009900	1.22962	5.70551e-30
TraesCS1D02G338300	1.22963	7.5051e-15
TraesCS2A02G437300	1.22986	0.00342485
TraesCS1D02G259300	1.22998	1.83344e-07
TraesCS5D02G275300	1.23001	9.01747e-70
TraesCS2D02G315400	1.23008	2.43686e-46
TraesCS2A02G306400	1.23016	3.85707e-41
TraesCS6A02G050300	1.23031	2.21435e-07
TraesCS2D02G338700	1.23056	2.69124e-16
TraesCS1B02G199100	1.23064	1.2471e-25
TraesCS3B02G126400	1.23094	2.58937e-47
TraesCS2D02G545600	1.23094	0.00176626
TraesCS6A02G217200	1.23115	8.35051e-12
TraesCS3D02G387200	1.23123	3.85933e-05
TraesCS5B02G164500	1.23128	2.3165e-29
TraesCS1A02G350600	1.2313	1.44214e-05
TraesCS6A02G382600	1.23139	4.48308e-69
TraesCS4A02G367500	1.23141	2.18244e-29
TraesCS5D02G385900	1.23142	3.51086e-05
TraesCS2D02G467300	1.23146	2.28507e-36
TraesCS7D02G235000	1.23151	1.16962e-26
TraesCS7B02G115400	1.23154	0.00573608
TraesCS2A02G469300	1.2316	0.0151195
TraesCS1A02G298000	1.23179	4.4581e-08
TraesCS4A02G297700	1.23187	3.03687e-37
TraesCS5D02G320400	1.23199	4.06261e-25
TraesCS5D02G357300	1.232	4.88162e-12
TraesCS4B02G309800	1.23202	3.716e-14
TraesCS1B02G371900	1.23221	5.73002e-09
TraesCS6B02G159700	1.23252	0.00197107
TraesCS6D02G076400	1.23252	5.16575e-05
TraesCS5D02G075300	1.23274	0.000106773
TraesCS4B02G185500	1.23294	1.0632e-13
TraesCS1B02G231300	1.23313	7.37174e-43
TraesCS7D02G084200	1.2333	4.87194e-29
TraesCS3A02G109900	1.23331	1.96816e-48
TraesCS4D02G014400	1.23338	7.65495e-31
TraesCS7D02G396900	1.23349	0.00018056
TraesCS5D02G335200	1.23403	6.7407e-41
TraesCS3D02G020400	1.23405	1.09373e-13
TraesCS6D02G283700	1.23418	0.000516682
TraesCS2B02G241600	1.23438	0.00962328
TraesCS7B02G144300	1.23446	2.65435e-14
TraesCS1D02G115300	1.23461	3.34768e-07
TraesCS1D02G218500	1.23483	2.50178e-10
TraesCS7D02G381300	1.23489	0.0136621
TraesCS4B02G291000	1.23501	0.00104273
TraesCS4D02G096400	1.23508	3.30619e-24
TraesCS1B02G379300	1.23511	5.80682e-19
TraesCS5B02G169000	1.23527	6.35677e-12
TraesCS3D02G537400	1.23536	1.01279e-05
TraesCS6D02G287100	1.23545	2.23579e-15
TraesCS5A02G384700	1.23547	0.000896041
[truncated: 28,180 more rows]

## Sheet: Supplementary Data 4
Supplementary Data 4. 2365 Drought-activeted and TaDT1-response genes were generated from overlapped by Supplementary Data 2 and 3.
Gene ID	Description	Oryza sativa	Arabidopsis thaliana
TraesCS2A02G415300	Ethylene-responsive transcription factor ERF034 [UniProtKB/Swiss-Prot:Q8LBQ7]	Os04g0549700	AT2G44940
TraesCS4A02G267500	Ubiquitin-conjugating enzyme E2 variant 1A [UniProtKB/Swiss-Prot:Q93YP0]	Os03g0712300	AT1G23260
TraesCS1B02G215200	Tobamovirus multiplication protein 3 [UniProtKB/Swiss-Prot:Q9ZUM2]	Os10g0537500	AT2G02180
TraesCSU02G098500	Chaperone protein dnaJ 8, chloroplastic [UniProtKB/Swiss-Prot:Q9SAG8]	NA	NA
TraesCS5D02G445000	Protein LIFEGUARD 2 [UniProtKB/Swiss-Prot:Q9M1V9]	Os03g0795800	AT3G63310
TraesCS4D02G273600	Probable serine/threonine-protein kinase PBL16 [UniProtKB/Swiss-Prot:Q9FM85]	Os03g0159100	AT5G56460
TraesCS5A02G360200	Probable cyclic nucleotide-gated ion channel 14 [UniProtKB/Swiss-Prot:Q9SJA4]	Os09g0558300	AT2G23980
TraesCS4B02G278000	1,2-dihydroxy-3-keto-5-methylthiopentene dioxygenase 2 [UniProtKB/Swiss-Prot:Q10RE5]	Os03g0161800	AT4G14716
TraesCS5B02G147100	NA	Os12g0112200	AT5G01800
TraesCS3A02G352800	V-type proton ATPase subunit a1 [UniProtKB/Swiss-Prot:Q8RWZ7]	Os01g0834200	AT2G28520
TraesCS3B02G388700	P-loop NTPase domain-containing protein LPA1 [UniProtKB/Swiss-Prot:B9F4I8]	Os02g0819400	AT3G45090
TraesCS5A02G468400	Probable methylenetetrahydrofolate reductase [UniProtKB/Swiss-Prot:Q75HE6]	Os03g0815200	AT2G44160
TraesCS6B02G354200	Probable cyclic nucleotide-gated ion channel 20, chloroplastic [UniProtKB/Swiss-Prot:Q9LD37]	Os02g0773400	NA
TraesCS5B02G236500	Abscisic acid 8'-hydroxylase 3 [UniProtKB/Swiss-Prot:Q0J185]	Os09g0457100	AT3G19270
TraesCS1A02G000400	NA	NA	NA
TraesCS3A02G353700	TBC1 domain family member 8B [UniProtKB/Swiss-Prot:A3KGB4]	Os01g0835000	AT3G55020
TraesCS4D02G267800	Cell division cycle protein 48 homolog [UniProtKB/Swiss-Prot:P54774]	Os03g0151800	AT5G03340
TraesCS1D02G036500	Probable clathrin assembly protein At4g32285 [UniProtKB/Swiss-Prot:Q8S9J8]	Os05g0112101	NA
TraesCS6D02G065200	S-(+)-linalool synthase, chloroplastic [UniProtKB/Swiss-Prot:Q6ZH94]	Os02g0121700	NA
TraesCS1D02G208900	Very-long-chain aldehyde decarbonylase GL1-10 [UniProtKB/Swiss-Prot:Q9AV39]	Os10g0545200	AT4G12110
TraesCS4D02G338900	NA	Os03g0142900	AT3G04350
TraesCS2A02G152400	Cytochrome P450 709B2 [UniProtKB/Swiss-Prot:F4IK45]	Os07g0635500	NA
TraesCS6A02G310300	Metalloendoproteinase 3-MMP [UniProtKB/Swiss-Prot:Q5XF51]	Os02g0740700	AT1G59970
TraesCS2A02G127300	UDP-N-acetylglucosamine--dolichyl-phosphate N-acetylglucosaminephosphotransferase [UniProtKB/Swiss-Prot:P0CD61]	Os07g0661100	AT2G41490
TraesCS6D02G146000	Choline-phosphate cytidylyltransferase 1 [UniProtKB/Swiss-Prot:Q9ZV56]	Os02g0173500	AT2G32260
TraesCS4D02G212700	SH3 domain-containing protein 2 [UniProtKB/Swiss-Prot:Q8VWF1]	Os03g0266700	NA
TraesCS1A02G031200	Receptor-like cytoplasmic kinase 176 [UniProtKB/Swiss-Prot:Q65XV8]	Os05g0110900	AT2G28930
TraesCS4D02G028800	1,4-dihydroxy-2-naphthoyl-CoA thioesterase 1 [UniProtKB/Swiss-Prot:Q9SX65]	Os03g0691400	AT1G48320
TraesCS5A02G147500	Probable serine/threonine-protein kinase WNK8 [UniProtKB/Swiss-Prot:Q2QYL8]	Os11g0114600	AT5G01850
TraesCS5B02G322000	Lon protease homolog 2, peroxisomal [UniProtKB/Swiss-Prot:B8BDV1]	Os09g0533400	AT5G47040
TraesCS1D02G258800	Tubulin beta-1 chain [UniProtKB/Swiss-Prot:Q9ZRB2]	Os05g0413200	AT5G12250
TraesCS7D02G226300	Carboxyl-terminal-processing peptidase 3, chloroplastic [UniProtKB/Swiss-Prot:F4J3G5]	Os06g0318600	AT3G57680
TraesCS3A02G282500	NA	Os01g0729900	AT3G14830
TraesCS7D02G528600	NA	Os06g0724400	NA
TraesCS3D02G287800	Serine carboxypeptidase-like 18 [UniProtKB/Swiss-Prot:Q9C7Z9]	Os10g0101200	NA
TraesCS7B02G244800	E3 ubiquitin-protein ligase SINAT3 [UniProtKB/Swiss-Prot:Q84JL3]	Os02g0293400	AT5G53360
TraesCS5B02G131600	Heavy metal-associated isoprenylated plant protein 32 [UniProtKB/Swiss-Prot:Q9M8K5]	Os12g0144600	NA
TraesCS6A02G207300	Probable bifunctional riboflavin biosynthesis protein RIBA 2, chloroplastic [UniProtKB/Swiss-Prot:Q0E079]	Os02g0572400	AT5G64300
TraesCS4A02G017700	Cyclic dof factor 2 [UniProtKB/Swiss-Prot:Q93ZL5]	Os03g0169600	NA
TraesCS3B02G476000	Transcription factor ICE1 [UniProtKB/Swiss-Prot:Q9LSE2]	Os01g0928000	NA
TraesCS4B02G126300	Spastin [UniProtKB/Swiss-Prot:B2RYN7]	Os11g0661400	NA
TraesCS6B02G272000	Protein S-acyltransferase 10 [UniProtKB/Swiss-Prot:Q7XA86]	Os04g0562000	NA
TraesCS4B02G086300	Probably inactive leucine-rich repeat receptor-like protein kinase At5g48380 [UniProtKB/Swiss-Prot:Q9ASS4]	Os11g0249900	AT2G43700
TraesCS6B02G344900	NA	NA	NA
TraesCS7D02G543200	Phosphatidylinositol 4-phosphate 5-kinase 9 [UniProtKB/Swiss-Prot:Q8L850]	Os02g0822500	AT3G09920
TraesCS7D02G249000	Chaperone protein dnaJ 10 [UniProtKB/Swiss-Prot:Q8GYX8]	Os09g0493800	AT1G76700
TraesCS2A02G342700	Short-chain dehydrogenase PC-15 [UniProtKB/Swiss-Prot:A0A0E3D8L9]	Os04g0457200	AT5G65205
TraesCS3D02G343900	Internal alternative NAD(P)H-ubiquinone oxidoreductase A1, mitochondrial [UniProtKB/Swiss-Prot:Q8GWA1]	Os01g0830100	AT1G07180
TraesCS4A02G035700	Cell division cycle protein 48 homolog [UniProtKB/Swiss-Prot:P54774]	Os03g0151800	AT5G03340
TraesCS1A02G234200	Heterogeneous nuclear ribonucleoprotein 1 [UniProtKB/Swiss-Prot:Q8W034]	Os05g0376000	AT4G36960
TraesCS4D02G219400	NA	Os03g0257500	NA
TraesCS1D02G421300	Proteasome subunit beta type-6 [UniProtKB/Swiss-Prot:Q8LD27]	Os06g0139900	AT4G31300
TraesCS2B02G305900	Potassium transporter 1 [UniProtKB/Swiss-Prot:Q6VVA6]	Os04g0401700	AT4G13420
TraesCS1A02G251900	Probable aspartic proteinase GIP2 [UniProtKB/Swiss-Prot:P0DO21]	Os05g0402900	NA
TraesCS6B02G259400	Uncharacterized protein At2g24330 [UniProtKB/Swiss-Prot:Q9ZQ34]	Os02g0631000	NA
TraesCS1A02G153600	Vacuolar protein sorting-associated protein 2 homolog 3 [UniProtKB/Swiss-Prot:Q941D5]	Os10g0476400	AT1G03950
TraesCS6B02G160800	5'-nucleotidase SurE [UniProtKB/Swiss-Prot:B2VA83]	Os07g0204500	NA
TraesCS5B02G001100	Protein NRT1/ PTR FAMILY 2.11 [UniProtKB/Swiss-Prot:Q9LV10]	Os12g0638300	NA
TraesCS2B02G499600	26S proteasome regulatory subunit 6B homolog [UniProtKB/Swiss-Prot:Q9SEI4]	Os02g0325100	AT5G58290
TraesCS2B02G516700	Fructan 6-exohydrolase [UniProtKB/Swiss-Prot:Q2UXF7]	Os04g0664800	NA
TraesCSU02G053600	ABC transporter D family member 1 [UniProtKB/Swiss-Prot:Q94FB9]	Os01g0966100	AT4G39850
TraesCS2D02G382600	Beta-fructofuranosidase 1 [UniProtKB/Swiss-Prot:P49175]	Os04g0535600	AT1G62660
TraesCS6B02G051800	Glycerol-3-phosphate 2-O-acyltransferase 6 [UniProtKB/Swiss-Prot:O80437]	Os02g0114400	AT2G38110
TraesCS1B02G439200	Disease resistance protein RGA5 [UniProtKB/Swiss-Prot:Q2R8L1]	NA	NA
TraesCS2D02G308100	Chloride channel protein CLC-c [UniProtKB/Swiss-Prot:Q96282]	Os02g0558100	AT5G49890
TraesCS7D02G027100	Binding partner of ACD11 1 [UniProtKB/Swiss-Prot:Q9LFD5]	Os06g0112400	AT5G16840
TraesCS2B02G289000	WRKY transcription factor WRKY51 [UniProtKB/Swiss-Prot:Q0JEE2]	Os04g0287400	NA
TraesCS1A02G153100	Long-chain-alcohol oxidase FAO2 [UniProtKB/Swiss-Prot:B5WWZ9]	Os10g0474800	AT3G23410
TraesCS7A02G487400	L-lactate dehydrogenase B (Fragment) [UniProtKB/Swiss-Prot:P22989]	NA	NA
TraesCS4D02G034600	Pescadillo homolog [UniProtKB/Swiss-Prot:Q851S7]	Os03g0699200	AT5G14520
TraesCS5B02G449700	NA	Os11g0528400	AT3G19340
TraesCS5D02G023700	Protein TAR1 [UniProtKB/Swiss-Prot:Q6CQE5]	NA	NA
TraesCS6D02G288700	Nucleobase-ascorbate transporter 6 [UniProtKB/Swiss-Prot:Q27GI3]	Os02g0741800	AT1G60030
TraesCS1D02G424400	Transcription elongation factor 1 homolog [UniProtKB/Swiss-Prot:Q8LHP0]	Os07g0631100	AT5G46030
TraesCS3B02G270300	CTD small phosphatase-like protein 2 [UniProtKB/Swiss-Prot:Q54GB2]	Os01g0665300	AT1G29780
TraesCS4B02G012100	Serine/threonine-protein kinase CTR1 [UniProtKB/Swiss-Prot:Q05609]	Os09g0566550	NA
TraesCSU02G173800	NA	NA	NA
TraesCS4B02G043000	NA	Os03g0707200	NA
TraesCS6A02G285900	KH domain-containing protein At5g56140 [UniProtKB/Swiss-Prot:Q9FKT4]	Os02g0722700	AT5G56140
TraesCS5A02G092000	NA	Os12g0552500	AT2G47710
TraesCS5D02G001200	Sucrose transport protein SUT2 [UniProtKB/Swiss-Prot:Q0ILJ3]	Os12g0641400	AT1G09960
TraesCS1A02G427500	NA	Os05g0587400	NA
TraesCS6D02G087200	BRCT domain-containing protein At4g02110 [UniProtKB/Swiss-Prot:O04251]	NA	NA
TraesCS3B02G311300	Glucan endo-1,3-beta-glucosidase 13 [UniProtKB/Swiss-Prot:Q9FJU9]	Os01g0739700	AT4G29360
TraesCS2A02G323200	BTB/POZ and TAZ domain-containing protein 2 [UniProtKB/Swiss-Prot:Q94BN0]	Os04g0482300	NA
TraesCSU02G005100	DIMBOA UDP-glucosyltransferase BX9 [UniProtKB/Swiss-Prot:B4G072]	NA	NA
TraesCS1A02G352700	CLP protease regulatory subunit CLPX1, mitochondrial [UniProtKB/Swiss-Prot:Q9FK07]	Os05g0533900	NA
TraesCS1A02G038400	Poly [ADP-ribose] polymerase 1 [UniProtKB/Swiss-Prot:Q7EYV7]	Os07g0413700	AT2G31320
TraesCS6B02G148200	Probable protein phosphatase 2C 10 [UniProtKB/Swiss-Prot:Q67UX7]	Os02g0149800	AT4G31750
TraesCS1A02G338200	Probable alpha,alpha-trehalose-phosphate synthase [UDP-forming] 7 [UniProtKB/Swiss-Prot:Q9LMI0]	Os05g0517200	AT1G06410
TraesCS3D02G187900	26S proteasome non-ATPase regulatory subunit 14 homolog [UniProtKB/Swiss-Prot:Q9LT08]	Os01g0267200	AT5G23540
TraesCS6B02G449800	Protein neuralized [UniProtKB/Swiss-Prot:Q24746]	Os02g0823300	AT5G04460
TraesCS5D02G069700	Pyridoxal kinase [UniProtKB/Swiss-Prot:Q8W1X2]	Os12g0600400	AT5G37850
TraesCS2B02G452900	NA	Os04g0606700	NA
TraesCS1B02G224100	Altered inheritance of mitochondria protein 32 [UniProtKB/Swiss-Prot:A5DK49]	Os02g0725100	AT4G26620
TraesCS7D02G390300	NA	Os06g0624900	AT1G76590
TraesCS4B02G123800	Probable serine/threonine-protein kinase PBL8 [UniProtKB/Swiss-Prot:Q8GXZ3]	Os11g0121400	AT5G01020
TraesCS5D02G145100	Probable serine/threonine-protein kinase WNK8 [UniProtKB/Swiss-Prot:Q2QYL8]	Os11g0114600	AT3G51630
TraesCS1A02G186700	Probable glutathione S-transferase GSTU6 [UniProtKB/Swiss-Prot:Q06398]	Os10g0528900	NA
TraesCS2A02G380100	NA	Os04g0520700	NA
TraesCS2A02G399200	SPX domain-containing membrane protein Os04g0573000 [UniProtKB/Swiss-Prot:Q0JAW2]	Os04g0573000	AT1G63010
TraesCS2A02G196100	NA	Os07g0572400	NA
TraesCS6A02G400000	Putative aconitate hydratase, cytoplasmic [UniProtKB/Swiss-Prot:Q6YZX6]	Os08g0191100	AT4G35830
TraesCS2B02G466400	Myb-related protein Zm1 [UniProtKB/Swiss-Prot:P20024]	Os04g0594100	AT4G17785
TraesCS7D02G123000	Disease resistance protein RGA2 [UniProtKB/Swiss-Prot:Q7XBQ9]	Os08g0542200	NA
TraesCS1D02G089400	Probable E3 ubiquitin-protein ligase XBOS34 [UniProtKB/Swiss-Prot:Q7XI08]	Os07g0446100	NA
TraesCS3B02G208300	NAC domain-containing protein 74 [UniProtKB/Swiss-Prot:Q7GCL7]	Os01g0261200	NA
TraesCS1D02G001600	L-gulonolactone oxidase 2 [UniProtKB/Swiss-Prot:Q6NQ66]	Os08g0114300	AT5G56470
TraesCS1A02G066900	Protein SEEDLING PLASTID DEVELOPMENT 1 [UniProtKB/Swiss-Prot:F4J3R7]	Os07g0187400	AT3G10420
TraesCS7A02G269100	Hydroxymethylglutaryl-CoA synthase [UniProtKB/Swiss-Prot:P54873]	Os08g0544900	AT4G11820
TraesCS6D02G143300	NA	Os02g0175900	AT2G19270
TraesCS2D02G078500	Protein NETWORKED 2D [UniProtKB/Swiss-Prot:F4IJK1]	Os07g0695400	NA
TraesCS4D02G054300	Iron-sulfur assembly protein IscA-like 1, mitochondrial [UniProtKB/Swiss-Prot:Q8LBM4]	Os12g0485500	AT2G36260
TraesCS2B02G491200	Autophagy-related protein 8C [UniProtKB/Swiss-Prot:Q6Z1D5]	Os04g0624000	AT1G62040
TraesCS6D02G232300	NA	Os02g0657700	NA
TraesCS1D02G409900	Beta-adaptin-like protein A [UniProtKB/Swiss-Prot:Q9LDK9]	Os01g0626200	NA
TraesCS2A02G421400	Gamma-aminobutyrate transaminase 1, mitochondrial [UniProtKB/Swiss-Prot:Q01K11]	Os04g0614600	AT3G22200
TraesCS6A02G184100	Histone deacetylase 1 [UniProtKB/Swiss-Prot:Q7Y0Y8]	Os02g0214900	AT4G38130
TraesCS5A02G437900	Heat stress transcription factor A-2e [UniProtKB/Swiss-Prot:Q6F388]	Os03g0795900	AT3G22830
TraesCS5D02G343000	Serine/threonine-protein kinase STY17 [UniProtKB/Swiss-Prot:Q8RWL6]	Os09g0544300	AT4G35780
TraesCS5A02G054300	Protein NETWORKED 1A [UniProtKB/Swiss-Prot:Q9LUI2]	Os12g0605200	NA
TraesCS6A02G360100	Serine/threonine-protein kinase VPS15 [UniProtKB/Swiss-Prot:Q9M0E5]	Os02g0796700	AT4G29380
TraesCS4D02G012600	Protein VAPYRIN [UniProtKB/Swiss-Prot:D3J162]	Os03g0655500	NA
TraesCS7A02G157200	Ubiquitin-conjugating enzyme E2 34 [UniProtKB/Swiss-Prot:Q9SHI7]	Os06g0193000	AT5G50430
TraesCS4B02G315400	Calmodulin-binding receptor-like cytoplasmic kinase 2 [UniProtKB/Swiss-Prot:Q8VZJ9]	Os03g0148700	NA
TraesCS5D02G219300	Protein TIFY 10c [UniProtKB/Swiss-Prot:A2Z1N3]	Os09g0439200	AT1G72450
TraesCS7B02G104500	Dynamin-2B [UniProtKB/Swiss-Prot:Q9LQ55]	Os06g0247800	AT1G10290
TraesCS2B02G370400	Protein NLP2 [UniProtKB/Swiss-Prot:Q0JC27]	Os04g0495800	AT2G43500
TraesCS1D02G334200	TLC domain-containing protein 4 [UniProtKB/Swiss-Prot:Q8CGF5]	Os05g0511000	AT4G19645
TraesCS6D02G214300	Probable metal-nicotianamine transporter YSL14 [UniProtKB/Swiss-Prot:Q6H7J6]	Os02g0633300	AT1G65730
TraesCS6B02G389200	Leucine aminopeptidase 2, chloroplastic [UniProtKB/Swiss-Prot:Q6K669]	Os02g0794700	AT4G30920
TraesCS5A02G008300	NA	NA	NA
TraesCS2B02G302400	ACT domain-containing protein ACR4 [UniProtKB/Swiss-Prot:Q8LJW3]	Os04g0391500	AT3G01990
TraesCS5D02G302800	Beta-glucosidase 31 [UniProtKB/Swiss-Prot:B7F7K7]	Os09g0511600	NA
TraesCS4B02G210300	Probable mannose-1-phosphate guanylyltransferase 1 [UniProtKB/Swiss-Prot:Q84JH5]	Os03g0268400	AT3G55590
TraesCS2D02G031900	NA	Os04g0110600	NA
TraesCS3B02G300300	O-acyltransferase WSD1 [UniProtKB/Swiss-Prot:Q93ZR6]	Os01g0681000	NA
TraesCS3B02G149100	Phospholipase D alpha 1 [UniProtKB/Swiss-Prot:Q43007]	Os01g0172400	AT1G52570
TraesCS1D02G382400	NA	Os08g0410500	AT1G78130
TraesCS2D02G441300	TPR and ankyrin repeat-containing protein 1 [UniProtKB/Swiss-Prot:O15050]	Os04g0599650	NA
TraesCS1A02G296300	Protein MALE DISCOVERER 2 [UniProtKB/Swiss-Prot:C0LGQ4]	Os05g0471000	AT2G40270
TraesCS4B02G057100	NA	Os03g0726400	AT2G22795
TraesCS1A02G166200	Basic secretory protease (Fragments) [UniProtKB/Swiss-Prot:C0HJG8]	Os10g0491000	NA
TraesCS6B02G214600	CASP-like protein 2D1 [UniProtKB/Swiss-Prot:Q6YW53]	Os02g0219900	NA
TraesCS2A02G182600	Eukaryotic translation initiation factor 5A [UniProtKB/Swiss-Prot:P80639]	Os07g0597000	AT1G26630
TraesCS2D02G285000	Transport inhibitor response 1-like protein Os04g0395600 [UniProtKB/Swiss-Prot:Q7XVM8]	Os04g0395600	AT3G26810
TraesCS4A02G195700	NA	Os12g0112200	AT5G01800
TraesCS5A02G125200	Transcription factor LHW [UniProtKB/Swiss-Prot:Q9XIN0]	Os12g0160400	NA
TraesCS3B02G237000	Protein ROOT HAIR DEFECTIVE 3 [UniProtKB/Swiss-Prot:Q0JLS6]	Os01g0575000	AT3G13870
TraesCS1D02G378600	Threonine synthase 1, chloroplastic [UniProtKB/Swiss-Prot:Q9S7B5]	Os05g0549700	AT4G29840
TraesCS5B02G526000	Wall-associated receptor kinase 5 [UniProtKB/Swiss-Prot:Q9LMN7]	Os03g0841100	NA
TraesCS5D02G364100	Chlorophyllase-2 [UniProtKB/Swiss-Prot:Q9M7I7]	Os02g0286700	NA
TraesCS2D02G063200	mRNA-capping enzyme [UniProtKB/Swiss-Prot:O55236]	Os12g0193200	AT3G09100
TraesCS1B02G289600	Guanylyl cyclase 1 [UniProtKB/Swiss-Prot:Q8L870]	Os05g0453500	AT5G05930
TraesCS1B02G099900	NA	Os01g0288200	AT3G17580
TraesCS1A02G087900	Probable ATP-dependent DNA helicase CHR12 [UniProtKB/Swiss-Prot:F4J9M5]	Os05g0144300	AT3G06010
TraesCS3A02G147900	NA	Os01g0221500	AT2G46220
TraesCS7B02G169500	Flavonoid 3'-monooxygenase CYP75B137 [UniProtKB/Swiss-Prot:A0A4D6Q415]	Os08g0547900	NA
TraesCS2A02G367800	Cytochrome P450 87A3 [UniProtKB/Swiss-Prot:Q7XU38]	Os03g0658800	AT4G13310
TraesCS1A02G441800	NA	NA	NA
TraesCS2D02G039600	Fatty acid amide hydrolase [UniProtKB/Swiss-Prot:Q7XJJ7]	Os04g0102700	AT5G64440
TraesCS6B02G338100	NA	Os02g0742000	NA
TraesCS5D02G520200	Receptor-like cytosolic serine/threonine-protein kinase RBK1 [UniProtKB/Swiss-Prot:Q8H1D6]	Os03g0839700	NA
[truncated: 2,202 more rows]

## Sheet: Supplementary Data 5
Supplementary Data 5. The GO analysis of DEGs in Supplementary Data 4.
[truncated: 94 more rows]
